# Supplementary material for: Systemic Blood Proteome Patterns Reflect Disease Phenotypes in Neovascular Age-Related Macular Degeneration
Source: MDPI journal article supplement (doi:10.3390/ijms241210327), 2023-06-19
Supplement: s1 [file s1]

| Patient_No: | Patient_ID:  | CNV cntrl. Division | sex:   | enrollment: |
|-------------|--------------|---------------------|--------|-------------|
| 1           | Pat_76608963 | ECC                 | Male   | 58          |
| 2           | Pat_54492928 | ECC                 | Male   | 77          |
| 3           | Pat_70941820 | CAC                 | Male   | 82          |
| 4           | Pat_40845226 | CAC                 | Male   | 66          |
| 5           | Pat_27633233 | CAC                 | Female | 85          |
| 6           | Pat_89310130 | ECC                 | Female | 78          |
| 7           | Pat_31612294 | CAC                 | Male   | 80          |
| 8           | Pat_83949912 | ECC                 | Male   | 84          |
| 9           | Pat_67500132 | ECC                 | Male   | 90          |
| 10          | Pat_67252221 | CAC                 | Male   | 76          |
| 11          | Pat_73875872 | ECC                 | Female | 85          |
| 12          | Pat_65778210 | ECC                 | Female | 82          |
| 13          | Pat_31326153 | ECC                 | Female | 82          |
| 14          | Pat_46283813 | CAC                 | Male   | 80          |
| 15          | Pat_17245203 | CAC                 | Male   | 81          |
| 16          | Pat_68241366 | CAC                 | Male   | 77          |
| 17          | Pat_48132856 | CAC                 | Male   | 82          |
| 18          | Pat_12571947 | CAC                 | Male   | 90          |
| 19          | Pat_45133814 | CAC                 | Male   | 67          |
| 20          | Pat_26221381 | CAC                 | Male   | 71          |
| 21          | Pat_34733734 | ECC                 | Male   | 76          |
| 22          | Pat_38461865 | ECC                 | Female | 86          |
| 23          | Pat_52058796 | CAC                 | Female | 91          |
| 24          | Pat_22604786 | CAC                 | Male   | 63          |
| 25          | Pat_42695399 | ECC                 | Male   | 83          |
| 26          | Pat_40421987 | CAC                 | Male   | 94          |
| 27          | Pat_84309715 | CAC                 | Female | 90          |
| 28          | Pat_86310779 | CAC                 | Female | 77          |
| 29          | Pat_46451988 | ECC                 | Male   | 82          |
| 30          | Pat_28774629 | ECC                 | Female | 87          |
| 31          | Pat_86585288 | ECC                 | Female | 75          |
| 32          | Pat_41898454 | ECC                 | Female | 79          |
| 33          | Pat_65733877 | ECC                 | Female | 86          |
| 34          | Pat_47725149 | CAC                 | Female | 68          |
| 35          | Pat_76989158 | CCA                 | Female | 68          |
| 36          | Pat_30673586 | CAC                 | Female | 78          |
| 37          | Pat_57985953 | ECC                 | Female | 77          |
| 38          | Pat_52571904 | ECC                 | Female | 71          |
| 39          | Pat_63089210 | ECC                 | Male   | 74          |
| 40          | Pat_28457742 | CAC                 | Female | 81          |
| 41          | Pat_80222324 | CAC                 | Male   | 82          |
| 42          | Pat_55380571 | ECC                 | Female | 85          |
| 43          | Pat_58291154 | CAC                 | Male   | 75          |
| 44          | Pat_79891072 | CAC                 | Female | 76          |
| 45          | Pat_11846861 | ECC                 | Female | 77          |
| 46          | Pat_25263012 | CAC                 | Female | 79          |
|             |              |                     |        |             |

A full page of blank graph paper. The grid consists of small squares formed by horizontal and vertical dashed lines. There are approximately 20 columns and 25 rows of squares. The margins are consistent on all sides.

| Diabetes: | arterial hypertension: | Smoking, current: | pack years: |
|-----------|------------------------|-------------------|-------------|
| yes       | yes                    | no                | no          |
| no        | yes                    | no                | no          |
| no        | yes                    | no                | 80          |
| no        | no                     | no                | 40          |
| no        | no                     | no                | 15          |
| yes       | yes                    | no                | no          |
| no        | no                     | no                | 30          |
| no        | no                     | yes               | 60          |
| yes       | yes                    | no                | 20          |
| no        | yes                    | no                | no          |
| yes       | yes                    | no                | no          |
| yes       | yes                    | yes               | 40          |
| no        | yes                    | no                | no          |
| no        | yes                    | no                | no          |
| yes       | yes                    | no                | 30          |
| no        | no                     | no                | no          |
| no        | yes                    | no                | 50          |
| no        | yes                    | no                | 50          |
| no        | no                     | yes               | 50          |
| yes       | yes                    | no                | no          |
| no        | yes                    | no                | no          |
| no        | no                     | no                | no          |
| no        | yes                    | no                | 30          |
| no        | yes                    | yes               | 15          |
| no        | no                     | yes               | 30          |
| no        | no                     | no                | 20          |
| no        | no                     | no                | no          |
| no        | yes                    | no                | no          |
| no        | yes                    | no                | no          |
| no        | no                     | no                | no          |
| no        | yes                    | no                | 30          |
| no        | yes                    | no                | no          |
| no        | yes                    | yes               | 60          |
| no        | no                     | no                | 10          |
| no        | yes                    | no                | no          |
| no        | yes                    | yes               | 30          |
| no        | no                     | no                | no          |
| no        | no                     | no                | no          |
| no        | yes                    | no                | no          |
| no        | no                     | no                | 10          |
| yes       | yes                    | no                | 12          |
| no        | yes                    | no                | no          |
| no        | yes                    | yes               | 30          |
| no        | yes                    | no                | 20          |
| no        | yes                    | no                | no          |
| no        | no                     | no                | no          |

[illegible]

| Pulmonary dysfunction and cause:      | Baseline BCVA LogMAR: | Baseline CRT in $\mu\text{m}$ : |
|---------------------------------------|-----------------------|---------------------------------|
| none specified                        | 0,16                  | 305                             |
| none specified                        | 0,26                  | 325                             |
| yes, multiple causes                  | 0,76                  | 510                             |
| none specified                        | 1,02                  | 381                             |
| none specified                        | 0,60                  | 371                             |
| none specified                        | 0,16                  | 293                             |
| none specified                        | 0,98                  | 421                             |
| COPD (Smoking)                        | 0,24                  | 251                             |
| Respiratory distress of unknown cause | 0,46                  | 271                             |
| none specified                        | 0,72                  | 318                             |
| multiple causes, passive smoker       | 0,60                  | 235                             |
| yes, a.e. Smoking                     | 0,62                  | 266                             |
| none specified                        |                       | 222                             |
| yes, Asthma bronchiale                | 0,28                  | 188                             |
| none specified                        | 1,22                  | 523                             |
| none specified                        | 0,24                  | 266                             |
| none specified                        | 0,50                  | 297                             |
| yes, due to smoking                   | 0,28                  | 325                             |
| yes, state after Tuberculosis         | 0,16                  | 253                             |
| none specified                        | 0,52                  | 574                             |
| none specified                        | 0,96                  | 340                             |
| none specified                        | 0,48                  | 369                             |
| none specified                        | 0,82                  | 228                             |
| none specified                        | -0,18                 | 267                             |
| COPD (Smoking)                        | 0,74                  | 301                             |
| yes, a.e. due to smoking              | 0,20                  | 392                             |
| none specified                        | 0,64                  | 383                             |
| none specified                        | 0,44                  | 279                             |
| none specified                        | 0,52                  | 243                             |
| none specified                        | 0,20                  | 227                             |
| none specified                        | 0,46                  | 230                             |
| none specified                        | 0,14                  | 275                             |
| COPD (Smoking)                        | 0,62                  | 293                             |
| none specified                        | 0,38                  | 352                             |
| none specified                        | 0,18                  | 373                             |
| yes, due to smoking                   | 0,48                  | 524                             |
| none specified                        | 0,16                  | 295                             |
| none specified                        | 0,02                  | 276                             |
| none specified                        | 0,52                  | 167                             |
| none specified                        | 0,56                  | 311                             |
| none specified                        | 0,28                  | 291                             |
| none specified                        | 0,54                  | 273                             |
| to smoking, already as a young woman  | 0,32                  | 338                             |
| COPD (Smoking)                        | 0,24                  | 357                             |
| none specified                        | 0,12                  | 313                             |
| yes, passive smoker, Bronchitis       | 0,48                  | 284                             |
|                                       |                       |                                 |

[illegible]

| Baseline IRC present: | Baseline SRF present: | Baseline SHRM present: |
|-----------------------|-----------------------|------------------------|
| not present           | present               | not present            |
| present               | present               | not present            |
| not present           | present               | present                |
| present               | present               | present                |
| present               | present               | present                |
| not present           | present               | not present            |
| not present           | not present           | present                |
| not applicable        | present               | not present            |
| present               | not present           | present                |
| present               | present               | present                |
| not present           | present               | not present            |
| present               | present               | present                |
| not present           | present               | not present            |
| not present           | not present           | not present            |
| present               | present               | present                |
| not present           | present               | present                |
| present               | present               | present                |
| not present           | present               | present                |
| not present           | present               | present                |
| not present           | present               | not present            |
| present               | not present           | not present            |
| present               | not present           | not present            |
| present               | not present           | present                |
| not present           | present               | present                |
| present               | not present           | present                |
| not present           | present               | present                |
| present               | present               | present                |
| present               | present               | present                |
| present               | not present           | present                |
| not present           | present               | not present            |
| not present           | not present           | not present            |
| not present           | present               | not present            |
| not present           | present               | not present            |
| present               | not present           | present                |
| present               | present               | present                |
| present               | present               | present                |
| not present           | not present           | not present            |
| not present           | present               | not present            |
| present               | not present           | present                |
| present               | present               | present                |
| not present           | present               | present                |
| not present           | not present           | not present            |
| present               | present               | not present            |
| not present           | present               | present                |
| not present           | present               | not present            |
| present               | present               | present                |
