# Supplementary material for: Systemic Blood Proteome Patterns Reflect Disease Phenotypes in Neovascular Age-Related Macular Degeneration
Source: MDPI journal article supplement (doi:10.3390/ijms241210327), 2023-06-19
Supplement: s1 [file s1]

Suppl. Table. S8\_CorrelationCoeffSignifSVM

|                                            | Pearson R                    | Adj. p-val. (2 sided test, Benjamini-H. cor.) |
|--------------------------------------------|------------------------------|-----------------------------------------------|
| HBB-HUMAN                                  | c(cor = 0.387156375830354)   | 0.99904062373978                              |
| HBA-HUMAN                                  | c(cor = 0.0469912356350863)  | 0.99904062373978                              |
| HBG1-HUMAN                                 | c(cor = 0.157955745493422)   | 0.99904062373978                              |
| ALBU-HUMAN                                 | c(cor = -0.40235252416678)   | 0.99904062373978                              |
| HBD-HUMAN                                  | c(cor = 0.267551569590014)   | 0.99904062373978                              |
| IGG1-HUMAN                                 | c(cor = -0.394268802683467)  | 0.99904062373978                              |
| CAH1-HUMAN                                 | c(cor = -0.237273238661242)  | 0.99904062373978                              |
| PRDX2-HUMAN                                | c(cor = 0.121546868784057)   | 0.99904062373978                              |
| IGLL1-HUMAN                                | c(cor = 0.0129123477995402)  | 0.99904062373978                              |
| IGKC-HUMAN                                 | c(cor = -0.164093167364994)  | 0.99904062373978                              |
| APOA1-HUMAN                                | c(cor = -0.301053365436796)  | 0.99904062373978                              |
| TRFE-HUMAN                                 | c(cor = -0.438650346372733)  | 0.99904062373978                              |
| FIBB-HUMAN                                 | c(cor = -0.199307254234097)  | 0.99904062373978                              |
| FIBG-HUMAN                                 | c(cor = -0.40998195445516)   | 0.99904062373978                              |
| A1AT-HUMAN                                 | c(cor = -0.283846851544192)  | 0.99904062373978                              |
| IGL1-HUMAN                                 | c(cor = -0.503901821226149)  | 0.99904062373978                              |
| IGHG2-HUMAN                                | c(cor = -0.423049996318855)  | 0.99904062373978                              |
| BLVRB-HUMAN                                | c(cor = -0.0194061778419403) | 0.99904062373978                              |
| IGK-HUMAN                                  | c(cor = -0.301099823234324)  | 0.99904062373978                              |
| CD2AP-HUMAN                                | c(cor = 0.155976316007266)   | 0.99904062373978                              |
| CAH2-HUMAN                                 | c(cor = 0.164650384502133)   | 0.99904062373978                              |
| FIBA-HUMAN                                 | c(cor = -0.452353532610202)  | 0.99904062373978                              |
| B3AT-HUMAN                                 | c(cor = 0.334405126137004)   | 0.99904062373978                              |
| IGHA1-HUMAN                                | c(cor = -0.179781222098731)  | 0.99904062373978                              |
| RL11-HUMAN                                 | c(cor = 0.00710440909770293) | 0.99904062373978                              |
| IGLC7-HUMAN                                | c(cor = -0.334540622894896)  | 0.99904062373978                              |
| A2MG-HUMAN                                 | c(cor = -0.0872485178789517) | 0.99904062373978                              |
| CATA-HUMAN                                 | c(cor = -0.408661469155341)  | 0.99904062373978                              |
| PLF4-HUMAN                                 | c(cor = -0.283723963309929)  | 0.99904062373978                              |
| DEF3-HUMAN                                 | c(cor = -0.122588043477338)  | 0.99904062373978                              |
| HPT-HUMAN                                  | c(cor = -0.399301349611062)  | 0.99904062373978                              |
| IGLC2-HUMAN;IGLC3-HUMAN                    | c(cor = 0.00218459917939126) | 0.99904062373978                              |
| APOB-HUMAN                                 | c(cor = 0.0875957570598987)  | 0.99904062373978                              |
| CO3-HUMAN                                  | c(cor = -0.321770256265665)  | 0.99904062373978                              |
| APOA2-HUMAN                                | c(cor = -0.27754457676826)   | 0.99904062373978                              |
| A1AG1-HUMAN                                | c(cor = -0.277189573950929)  | 0.99904062373978                              |
| ACTB-HUMAN                                 | c(cor = -0.399607294811159)  | 0.99904062373978                              |
| PRDX6-HUMAN                                | c(cor = -0.211954646049482)  | 0.99904062373978                              |
| MINP1-HUMAN                                | c(cor = -0.112516988615088)  | 0.99904062373978                              |
| IGM-HUMAN                                  | c(cor = -0.179078104498959)  | 0.99904062373978                              |
| TRY1-HUMAN                                 | c(cor = -0.290739718124264)  | 0.99904062373978                              |
| G3P-HUMAN                                  | c(cor = -0.312998719565031)  | 0.99904062373978                              |
| S10A6-HUMAN                                | c(cor = -0.45894750631433)   | 0.99904062373978                              |
| ACTA-HUMAN;ACTH-HUMAN                      | c(cor = -0.264579816578492)  | 0.99904062373978                              |
| FETUA-HUMAN                                | c(cor = -0.343045757192561)  | 0.99904062373978                              |
| UBB-HUMAN;UBC-HUMAN;RS27A-HUMAN;RL40-HUMAN | c(cor = -0.42809732230434)   | 0.99904062373978                              |
| IGA2-HUMAN                                 | c(cor = -0.296058914779771)  | 0.99904062373978                              |

|                                |                                |                  |
|--------------------------------|--------------------------------|------------------|
| <b>APOA4-HUMAN</b>             | c(cor = -0.30708111360025)     | 0.99904062373978 |
| <b>ANK1-HUMAN</b>              | c(cor = 0.0971364252171818)    | 0.99904062373978 |
| <b>SPTB1-HUMAN</b>             | c(cor = -0.0499609546330647)   | 0.99904062373978 |
| <b>IGHG3-HUMAN</b>             | c(cor = -0.213515160101679)    | 0.99904062373978 |
| <b>HEMO-HUMAN</b>              | c(cor = -0.0484127668137968)   | 0.99904062373978 |
| <b>PMGE-HUMAN</b>              | c(cor = -0.256595483566693)    | 0.99904062373978 |
| <b>APOC3-HUMAN</b>             | c(cor = -0.510523109116954)    | 0.99904062373978 |
| <b>EPB42-HUMAN</b>             | c(cor = 0.0193094503318195)    | 0.99904062373978 |
| <b>SBP1-HUMAN</b>              | c(cor = 0.306785863164802)     | 0.99904062373978 |
| <b>PFD2-HUMAN</b>              | c(cor = 0.024246565165018)     | 0.99904062373978 |
| <b>A1AG2-HUMAN</b>             | c(cor = -0.337717412927966)    | 0.99904062373978 |
| <b>SPTA1-HUMAN</b>             | c(cor = -0.137283149072925)    | 0.99904062373978 |
| <b>HEM2-HUMAN</b>              | c(cor = -0.216732015588859)    | 0.99904062373978 |
| <b>VTDB-HUMAN</b>              | c(cor = -0.404952185590639)    | 0.99904062373978 |
| <b>ITIH4-HUMAN</b>             | c(cor = -0.28757847566588)     | 0.99904062373978 |
| <b>KV228-HUMAN;KVD28-HUMAN</b> | c(cor = -0.254035646392488)    | 0.99904062373978 |
| <b>PRDX1-HUMAN</b>             | c(cor = -0.302413852325867)    | 0.99904062373978 |
| <b>RARR2-HUMAN</b>             | c(cor = -0.363654506766461)    | 0.99904062373978 |
| <b>KV315-HUMAN</b>             | c(cor = -0.402059102467419)    | 0.99904062373978 |
| <b>CO4A-HUMAN</b>              | c(cor = -0.261159037490995)    | 0.99904062373978 |
| <b>KVD20-HUMAN</b>             | c(cor = -0.394644405338852)    | 0.99904062373978 |
| <b>AACT-HUMAN</b>              | c(cor = -0.227576426640783)    | 0.99904062373978 |
| <b>A1BG-HUMAN</b>              | c(cor = -0.0187609204145218)   | 0.99904062373978 |
| <b>FINC-HUMAN</b>              | c(cor = -0.259675618736297)    | 0.99904062373978 |
| <b>RAN-HUMAN</b>               | c(cor = 0.411221455645501)     | 0.99904062373978 |
| <b>KNK1-HUMAN</b>              | c(cor = -0.443135857839535)    | 0.99904062373978 |
| <b>C4BPA-HUMAN</b>             | c(cor = -0.216815597753718)    | 0.99904062373978 |
| <b>PNPH-HUMAN</b>              | c(cor = -0.153355387827646)    | 0.99904062373978 |
| <b>IC1-HUMAN</b>               | c(cor = -0.266994281323197)    | 0.99904062373978 |
| <b>VTNC-HUMAN</b>              | c(cor = -0.46804305387849)     | 0.99904062373978 |
| <b>GSTO1-HUMAN</b>             | c(cor = -0.00813420036862601)  | 0.99904062373978 |
| <b>ANT3-HUMAN</b>              | c(cor = -0.322164359777951)    | 0.99904062373978 |
| <b>UB2V1-HUMAN</b>             | c(cor = -0.00310081261054906)  | 0.99904062373978 |
| <b>KV320-HUMAN</b>             | c(cor = -0.380163208726325)    | 0.99904062373978 |
| <b>MDHC-HUMAN</b>              | c(cor = 0.100185950794702)     | 0.99904062373978 |
| <b>NDKB-HUMAN</b>              | c(cor = -0.218468370277447)    | 0.99904062373978 |
| <b>PARK7-HUMAN</b>             | c(cor = -0.368098479449817)    | 0.99904062373978 |
| <b>HBG2-HUMAN</b>              | c(cor = -0.000537283163822594) | 0.99904062373978 |
| <b>ALDOA-HUMAN</b>             | c(cor = 0.156496091327956)     | 0.99904062373978 |
| <b>ITIH2-HUMAN</b>             | c(cor = -0.218136468556333)    | 0.99904062373978 |
| <b>FCG3A-HUMAN</b>             | c(cor = -0.294033006636289)    | 0.99904062373978 |
| <b>AL1A1-HUMAN</b>             | c(cor = -0.402562928783654)    | 0.99904062373978 |
| <b>SYUA-HUMAN</b>              | c(cor = -0.018742826505428)    | 0.99904062373978 |
| <b>PLMN-HUMAN</b>              | c(cor = -0.435462600349777)    | 0.99904062373978 |
| <b>CSN5-HUMAN</b>              | c(cor = -0.236943300023423)    | 0.99904062373978 |
| <b>TERA-HUMAN</b>              | c(cor = -0.243163945773213)    | 0.99904062373978 |
| <b>GDIB-HUMAN</b>              | c(cor = -0.320491300713591)    | 0.99904062373978 |
| <b>LDHA-HUMAN</b>              | c(cor = -0.235916099974491)    | 0.99904062373978 |
| <b>LDHB-HUMAN</b>              | c(cor = -0.173397380081993)    | 0.99904062373978 |

|                                                       |                              |                  |
|-------------------------------------------------------|------------------------------|------------------|
| <b>S10A4-HUMAN</b>                                    | c(cor = -0.0918894779462478) | 0.99904062373978 |
| <b>CFAH-HUMAN</b>                                     | c(cor = -0.38238350374661)   | 0.99904062373978 |
| <b>1433B-HUMAN</b>                                    | c(cor = -0.0831114331448882) | 0.99904062373978 |
| <b>KVD11-HUMAN;KV311-HUMAN</b>                        | c(cor = 0.00209510683165828) | 0.99904062373978 |
| <b>KV401-HUMAN</b>                                    | c(cor = -0.510288276449414)  | 0.99904062373978 |
| <b>CFAB-HUMAN</b>                                     | c(cor = -0.424634299374084)  | 0.99904062373978 |
| <b>PPIA-HUMAN</b>                                     | c(cor = -0.363760920751828)  | 0.99904062373978 |
| <b>C1QC-HUMAN</b>                                     | c(cor = -0.331370113730943)  | 0.99904062373978 |
| <b>KAD1-HUMAN</b>                                     | c(cor = 0.182749343873619)   | 0.99904062373978 |
| <b>C1QB-HUMAN</b>                                     | c(cor = -0.408764543056319)  | 0.99904062373978 |
| <b>LV861-HUMAN</b>                                    | c(cor = -0.14545106191726)   | 0.99904062373978 |
| <b>HV118-HUMAN</b>                                    | c(cor = 0.214659318666929)   | 0.99904062373978 |
| <b>TPIS-HUMAN</b>                                     | c(cor = -0.421663930677376)  | 0.99904062373978 |
| <b>HRG-HUMAN</b>                                      | c(cor = -0.289219787082709)  | 0.99904062373978 |
| <b>DEMA-HUMAN</b>                                     | c(cor = -0.163184654013789)  | 0.99904062373978 |
| <b>DOPD-HUMAN</b>                                     | c(cor = -0.162934995099528)  | 0.99904062373978 |
| <b>PGK1-HUMAN</b>                                     | c(cor = -0.162988204127667)  | 0.99904062373978 |
| <b>HV335-HUMAN</b>                                    | c(cor = -0.24985333363357)   | 0.99904062373978 |
| <b>CERU-HUMAN</b>                                     | c(cor = -0.316724951664106)  | 0.99904062373978 |
| <b>UB2Q2-HUMAN</b>                                    | c(cor = -0.139791640732757)  | 0.99904062373978 |
| <b>H2A1-HUMAN;H2A2C-HUMAN;H2A2A-HUMAN;H2A1C-HUMAN</b> | c(cor = -0.142621295609009)  | 0.99904062373978 |
| <b>APOH-HUMAN</b>                                     | c(cor = -0.0656437945181799) | 0.99904062373978 |
| <b>S10A8-HUMAN</b>                                    | c(cor = -0.186856456217331)  | 0.99904062373978 |
| <b>PRPS1-HUMAN</b>                                    | c(cor = -0.324260751889262)  | 0.99904062373978 |
| <b>41-HUMAN</b>                                       | c(cor = -0.179112059321501)  | 0.99904062373978 |
| <b>IMB1-HUMAN</b>                                     | c(cor = -0.0583895378648863) | 0.99904062373978 |
| <b>RINI-HUMAN</b>                                     | c(cor = -0.0116084176366536) | 0.99904062373978 |
| <b>6PGD-HUMAN</b>                                     | c(cor = -0.2073177416024)    | 0.99904062373978 |
| <b>APOE-HUMAN</b>                                     | c(cor = -0.279770442901811)  | 0.99904062373978 |
| <b>AXA2L-HUMAN;ANXA2-HUMAN</b>                        | c(cor = 0.116826374455725)   | 0.99904062373978 |
| <b>BIEA-HUMAN</b>                                     | c(cor = 0.171980180582123)   | 0.99904062373978 |
| <b>MIF-HUMAN</b>                                      | c(cor = 0.185909762618638)   | 0.99904062373978 |
| <b>HPRT-HUMAN</b>                                     | c(cor = -0.0888373059383634) | 0.99904062373978 |
| <b>THRB-HUMAN</b>                                     | c(cor = -0.461040559993192)  | 0.99904062373978 |
| <b>TGM2-HUMAN</b>                                     | c(cor = 0.0814173245101096)  | 0.99904062373978 |
| <b>RD23A-HUMAN</b>                                    | c(cor = -0.041839232366224)  | 0.99904062373978 |
| <b>HV373-HUMAN</b>                                    | c(cor = -0.374962509742549)  | 0.99904062373978 |
| <b>PPAC-HUMAN</b>                                     | c(cor = 0.00956263634632115) | 0.99904062373978 |
| <b>AFAM-HUMAN</b>                                     | c(cor = -0.373716582061178)  | 0.99904062373978 |
| <b>TPM4-HUMAN</b>                                     | c(cor = -0.361875698017814)  | 0.99904062373978 |
| <b>KVD24-HUMAN;KV224-HUMAN</b>                        | c(cor = -0.153273642247007)  | 0.99904062373978 |
| <b>UBE2N-HUMAN</b>                                    | c(cor = -0.214087350032735)  | 0.99904062373978 |
| <b>F10A1-HUMAN</b>                                    | c(cor = -0.0129146780400964) | 0.99904062373978 |
| <b>LGUL-HUMAN</b>                                     | c(cor = -0.449378998283956)  | 0.99904062373978 |
| <b>STOM-HUMAN</b>                                     | c(cor = 0.2779940957407)     | 0.99904062373978 |
| <b>S10A9-HUMAN</b>                                    | c(cor = -0.102257143938635)  | 0.99904062373978 |
| <b>CXCL7-HUMAN</b>                                    | c(cor = -0.174845164996362)  | 0.99904062373978 |
| <b>KV230-HUMAN</b>                                    | c(cor = -0.0608801917537324) | 0.99904062373978 |
| <b>AIDA-HUMAN</b>                                     | c(cor = 0.119268615056845)   | 0.99904062373978 |

|                                |                              |                   |
|--------------------------------|------------------------------|-------------------|
| <b>LV147-HUMAN</b>             | c(cor = -0.348934664441663)  | 0.99904062373978  |
| <b>CD5L-HUMAN</b>              | c(cor = -0.247390319782454)  | 0.99904062373978  |
| <b>GLO2-HUMAN</b>              | c(cor = -0.224372911997561)  | 0.99904062373978  |
| <b>HBAT-HUMAN</b>              | c(cor = -0.399555821802796)  | 0.99904062373978  |
| <b>APOC2-HUMAN</b>             | c(cor = -0.541039774572481)  | 0.770751712688323 |
| <b>COF1-HUMAN</b>              | c(cor = 0.268149075051628)   | 0.99904062373978  |
| <b>SAA4-HUMAN</b>              | c(cor = -0.398409507441332)  | 0.99904062373978  |
| <b>GLRX1-HUMAN</b>             | c(cor = 0.266782936347368)   | 0.99904062373978  |
| <b>TALDO-HUMAN</b>             | c(cor = -0.113182152351298)  | 0.99904062373978  |
| <b>CAN1-HUMAN</b>              | c(cor = -0.0767340821533609) | 0.99904062373978  |
| <b>APOM-HUMAN</b>              | c(cor = -0.254284218934433)  | 0.99904062373978  |
| <b>CAH3-HUMAN</b>              | c(cor = 0.164923000427582)   | 0.99904062373978  |
| <b>APOD-HUMAN</b>              | c(cor = -0.262651962871881)  | 0.99904062373978  |
| <b>C1S-HUMAN</b>               | c(cor = -0.381600328105887)  | 0.99904062373978  |
| <b>RS26-HUMAN;RS26L-HUMAN</b>  | c(cor = -0.293124301477235)  | 0.99904062373978  |
| <b>HV307-HUMAN</b>             | c(cor = -0.578967750097819)  | 0.254565471583673 |
| <b>GPX1-HUMAN</b>              | c(cor = 0.109102433419511)   | 0.99904062373978  |
| <b>HV169-HUMAN</b>             | c(cor = -0.190821321611385)  | 0.99904062373978  |
| <b>KLKB1-HUMAN</b>             | c(cor = -0.432330760503061)  | 0.99904062373978  |
| <b>ARF3-HUMAN;ARF1-HUMAN</b>   | c(cor = -0.359203544795479)  | 0.99904062373978  |
| <b>HSP7C-HUMAN</b>             | c(cor = 0.0800026284807712)  | 0.99904062373978  |
| <b>HV374-HUMAN</b>             | c(cor = -0.393423110566547)  | 0.99904062373978  |
| <b>1433Z-HUMAN</b>             | c(cor = -0.0639963604085912) | 0.99904062373978  |
| <b>PIMT-HUMAN</b>              | c(cor = -0.402449290589518)  | 0.99904062373978  |
| <b>ACPH-HUMAN</b>              | c(cor = 0.249451263820902)   | 0.99904062373978  |
| <b>IGHG4-HUMAN</b>             | c(cor = -0.318342877819393)  | 0.99904062373978  |
| <b>HV309-HUMAN</b>             | c(cor = -0.0871924432554222) | 0.99904062373978  |
| <b>NTF2-HUMAN</b>              | c(cor = 0.0613395138197615)  | 0.99904062373978  |
| <b>DDI2-HUMAN</b>              | c(cor = 0.282374404676814)   | 0.99904062373978  |
| <b>PGM2-HUMAN</b>              | c(cor = -0.216265719884488)  | 0.99904062373978  |
| <b>UBP5-HUMAN</b>              | c(cor = -0.047432542902448)  | 0.99904062373978  |
| <b>PSA4-HUMAN</b>              | c(cor = -0.191864678784296)  | 0.99904062373978  |
| <b>KVD13-HUMAN;KV113-HUMAN</b> | c(cor = 0.0645391630295674)  | 0.99904062373978  |
| <b>EM55-HUMAN</b>              | c(cor = -0.018183044216059)  | 0.99904062373978  |
| <b>ADDB-HUMAN</b>              | c(cor = -0.33293921437672)   | 0.99904062373978  |
| <b>GELS-HUMAN</b>              | c(cor = -0.320552765690063)  | 0.99904062373978  |
| <b>APOC1-HUMAN</b>             | c(cor = -0.450118371285276)  | 0.99904062373978  |
| <b>LV319-HUMAN</b>             | c(cor = -0.0700963930018632) | 0.99904062373978  |
| <b>PROS-HUMAN</b>              | c(cor = -0.470681968492168)  | 0.99904062373978  |
| <b>CFAI-HUMAN</b>              | c(cor = -0.349178670460636)  | 0.99904062373978  |
| <b>THIO-HUMAN</b>              | c(cor = -0.239888704125278)  | 0.99904062373978  |
| <b>CCS-HUMAN</b>               | c(cor = -0.0833428710651788) | 0.99904062373978  |
| <b>ITIH1-HUMAN</b>             | c(cor = -0.359698540683298)  | 0.99904062373978  |
| <b>NCEH1-HUMAN</b>             | c(cor = 0.114713737019647)   | 0.99904062373978  |
| <b>KV112-HUMAN;KVD12-HUMAN</b> | c(cor = -0.168687486611416)  | 0.99904062373978  |
| <b>HV434-HUMAN</b>             | c(cor = -0.141684966561163)  | 0.99904062373978  |
| <b>PEBP1-HUMAN</b>             | c(cor = -0.403753147071288)  | 0.99904062373978  |
| <b>TCPQ-HUMAN</b>              | c(cor = -0.343121490093448)  | 0.99904062373978  |
| <b>CAND1-HUMAN</b>             | c(cor = -0.363286702958541)  | 0.99904062373978  |

|                                            |                               |                  |
|--------------------------------------------|-------------------------------|------------------|
| <b>1433E-HUMAN</b>                         | c(cor = -0.0104376132842813)  | 0.99904062373978 |
| <b>A2AP-HUMAN</b>                          | c(cor = -0.483823714281916)   | 0.99904062373978 |
| <b>SORCN-HUMAN</b>                         | c(cor = 0.0205983587491761)   | 0.99904062373978 |
| <b>SAHH-HUMAN</b>                          | c(cor = 0.0894291575595227)   | 0.99904062373978 |
| <b>SODC-HUMAN</b>                          | c(cor = -0.231996610534816)   | 0.99904062373978 |
| <b>HARS1-HUMAN</b>                         | c(cor = -0.100836068393577)   | 0.99904062373978 |
| <b>CPNS1-HUMAN</b>                         | c(cor = -0.226085242115978)   | 0.99904062373978 |
| <b>HEP2-HUMAN</b>                          | c(cor = -0.428042981634609)   | 0.99904062373978 |
| <b>TYB4-HUMAN</b>                          | c(cor = -0.120655469260637)   | 0.99904062373978 |
| <b>LUM-HUMAN</b>                           | c(cor = -0.325202771697278)   | 0.99904062373978 |
| <b>CALM1-HUMAN;CALM2-HUMAN;CALM3-HUMAN</b> | c(cor = -0.318074409817839)   | 0.99904062373978 |
| <b>PTPRJ-HUMAN</b>                         | c(cor = -0.390426526192669)   | 0.99904062373978 |
| <b>HEM3-HUMAN</b>                          | c(cor = -0.0999344358211752)  | 0.99904062373978 |
| <b>IGHM-HUMAN</b>                          | c(cor = -0.237168334054245)   | 0.99904062373978 |
| <b>ANGT-HUMAN</b>                          | c(cor = -0.0500242146503892)  | 0.99904062373978 |
| <b>ICAL-HUMAN</b>                          | c(cor = 0.000207731534602111) | 0.99904062373978 |
| <b>TRFL-HUMAN</b>                          | c(cor = -0.0490314204991952)  | 0.99904062373978 |
| <b>FKB1A-HUMAN</b>                         | c(cor = -0.175347082118163)   | 0.99904062373978 |
| <b>PSMF1-HUMAN</b>                         | c(cor = 0.00267240378528711)  | 0.99904062373978 |
| <b>HYAS1-HUMAN</b>                         | c(cor = -0.181328511929474)   | 0.99904062373978 |
| <b>CO5-HUMAN</b>                           | c(cor = -0.349048642986455)   | 0.99904062373978 |
| <b>PTPA-HUMAN</b>                          | c(cor = -0.168460627144703)   | 0.99904062373978 |
| <b>HS71A-HUMAN;HS71B-HUMAN</b>             | c(cor = -0.297924572966214)   | 0.99904062373978 |
| <b>FHR3-HUMAN</b>                          | c(cor = -0.256996234312156)   | 0.99904062373978 |
| <b>APOA-HUMAN</b>                          | c(cor = -0.302574303232259)   | 0.99904062373978 |
| <b>CO4B-HUMAN</b>                          | c(cor = -0.45921253716142)    | 0.99904062373978 |
| <b>KPYR-HUMAN</b>                          | c(cor = -0.0287701668534052)  | 0.99904062373978 |
| <b>PSME1-HUMAN</b>                         | c(cor = -0.487631214824571)   | 0.99904062373978 |
| <b>C1QA-HUMAN</b>                          | c(cor = -0.287993170990251)   | 0.99904062373978 |
| <b>TSP1-HUMAN</b>                          | c(cor = -0.0930095931755415)  | 0.99904062373978 |
| <b>FBX7-HUMAN</b>                          | c(cor = -0.165829654153964)   | 0.99904062373978 |
| <b>HPTR-HUMAN</b>                          | c(cor = 0.0780307375597918)   | 0.99904062373978 |
| <b>ADDA-HUMAN</b>                          | c(cor = -0.336497575203709)   | 0.99904062373978 |
| <b>PITH1-HUMAN</b>                         | c(cor = -0.202160546732296)   | 0.99904062373978 |
| <b>LV144-HUMAN</b>                         | c(cor = -0.0706996676818565)  | 0.99904062373978 |
| <b>TCPG-HUMAN</b>                          | c(cor = 0.0688373780412744)   | 0.99904062373978 |
| <b>STIP1-HUMAN</b>                         | c(cor = 0.00842445312211781)  | 0.99904062373978 |
| <b>DCUP-HUMAN</b>                          | c(cor = -0.066825396937526)   | 0.99904062373978 |
| <b>AHSP-HUMAN</b>                          | c(cor = -0.181459310178098)   | 0.99904062373978 |
| <b>PSA1-HUMAN</b>                          | c(cor = -0.23252778521397)    | 0.99904062373978 |
| <b>FHR1-HUMAN</b>                          | c(cor = -0.322559257841844)   | 0.99904062373978 |
| <b>ENOA-HUMAN</b>                          | c(cor = -0.273496229724067)   | 0.99904062373978 |
| <b>CLIC1-HUMAN</b>                         | c(cor = -0.316062167042301)   | 0.99904062373978 |
| <b>IGJ-HUMAN</b>                           | c(cor = -0.238144166383918)   | 0.99904062373978 |
| <b>BMP1-HUMAN;TLL2-HUMAN</b>               | c(cor = 0.104198653904855)    | 0.99904062373978 |
| <b>APOL1-HUMAN</b>                         | c(cor = -0.511693281706841)   | 0.99904062373978 |
| <b>QCR7-HUMAN</b>                          | c(cor = -0.0905667044148587)  | 0.99904062373978 |
| <b>TCPZ-HUMAN</b>                          | c(cor = 0.00412991093548457)  | 0.99904062373978 |
| <b>UBP14-HUMAN</b>                         | c(cor = -0.174736362951607)   | 0.99904062373978 |

|                                                        |                              |                  |
|--------------------------------------------------------|------------------------------|------------------|
| <b>FCL-HUMAN</b>                                       | c(cor = -0.320445254945975)  | 0.99904062373978 |
| <b>2AAA-HUMAN</b>                                      | c(cor = -0.387459596355859)  | 0.99904062373978 |
| <b>CLUS-HUMAN</b>                                      | c(cor = -0.483462913081415)  | 0.99904062373978 |
| <b>GSHR-HUMAN</b>                                      | c(cor = 0.253042419172245)   | 0.99904062373978 |
| <b>IF5A1-HUMAN</b>                                     | c(cor = -0.145678152485257)  | 0.99904062373978 |
| <b>TCPE-HUMAN</b>                                      | c(cor = -0.334018539834914)  | 0.99904062373978 |
| <b>FLNA-HUMAN</b>                                      | c(cor = -0.264483669886454)  | 0.99904062373978 |
| <b>HEBP1-HUMAN</b>                                     | c(cor = -0.413148258561319)  | 0.99904062373978 |
| <b>PSA7-HUMAN</b>                                      | c(cor = -0.107738132418281)  | 0.99904062373978 |
| <b>PA1B3-HUMAN</b>                                     | c(cor = -0.183214889104441)  | 0.99904062373978 |
| <b>TCPB-HUMAN</b>                                      | c(cor = -0.146929156917145)  | 0.99904062373978 |
| <b>SKP1-HUMAN</b>                                      | c(cor = -0.0312359536431004) | 0.99904062373978 |
| <b>LV39-HUMAN</b>                                      | c(cor = -0.438170696263912)  | 0.99904062373978 |
| <b>NDKA-HUMAN</b>                                      | c(cor = -0.191579232056095)  | 0.99904062373978 |
| <b>TCPH-HUMAN</b>                                      | c(cor = -0.169980763238045)  | 0.99904062373978 |
| <b>TXNL1-HUMAN</b>                                     | c(cor = 0.261841933412438)   | 0.99904062373978 |
| <b>GSTP1-HUMAN</b>                                     | c(cor = -0.150770746530722)  | 0.99904062373978 |
| <b>HS90B-HUMAN</b>                                     | c(cor = -0.289229126918585)  | 0.99904062373978 |
| <b>HV5X1-HUMAN</b>                                     | c(cor = -0.212531521458288)  | 0.99904062373978 |
| <b>RPIA-HUMAN</b>                                      | c(cor = -0.338875146224814)  | 0.99904062373978 |
| <b>RET4-HUMAN</b>                                      | c(cor = -0.495493153559297)  | 0.99904062373978 |
| <b>BOLA2-HUMAN</b>                                     | c(cor = -0.0255501115998549) | 0.99904062373978 |
| <b>H2B1K-HUMAN;H2B1J-HUMAN;H2B1O-HUMAN;H2B1B-HUMAN</b> | c(cor = 0.104699181823662)   | 0.99904062373978 |
| <b>FA12-HUMAN</b>                                      | c(cor = -0.120588759738806)  | 0.99904062373978 |
| <b>IF4A1-HUMAN</b>                                     | c(cor = 0.18433068938471)    | 0.99904062373978 |
| <b>SHPS1-HUMAN;SIRBL-HUMAN;SIRPG-HUMAN</b>             | c(cor = -0.277368195917318)  | 0.99904062373978 |
| <b>UBA1-HUMAN</b>                                      | c(cor = -0.242959408557873)  | 0.99904062373978 |
| <b>SH3L3-HUMAN</b>                                     | c(cor = -0.126754828778694)  | 0.99904062373978 |
| <b>PNCB-HUMAN</b>                                      | c(cor = -0.246590458933576)  | 0.99904062373978 |
| <b>GTR1-HUMAN</b>                                      | c(cor = -0.0206490957534335) | 0.99904062373978 |
| <b>PSB2-HUMAN</b>                                      | c(cor = -0.212071617737876)  | 0.99904062373978 |
| <b>RAC1-HUMAN</b>                                      | c(cor = -0.365838641930562)  | 0.99904062373978 |
| <b>CO7-HUMAN</b>                                       | c(cor = -0.140447503034074)  | 0.99904062373978 |
| <b>PUR6-HUMAN</b>                                      | c(cor = -0.258132953227639)  | 0.99904062373978 |
| <b>ACLY-HUMAN</b>                                      | c(cor = -0.186118220678333)  | 0.99904062373978 |
| <b>WDR1-HUMAN</b>                                      | c(cor = -0.310198028919002)  | 0.99904062373978 |
| <b>HS90A-HUMAN</b>                                     | c(cor = -0.207880287180586)  | 0.99904062373978 |
| <b>CO9-HUMAN</b>                                       | c(cor = -0.385697174756609)  | 0.99904062373978 |
| <b>LV310-HUMAN</b>                                     | c(cor = -0.0855101881702172) | 0.99904062373978 |
| <b>TPM3-HUMAN</b>                                      | c(cor = -0.192628837578008)  | 0.99904062373978 |
| <b>PSA5-HUMAN</b>                                      | c(cor = -0.306208680957417)  | 0.99904062373978 |
| <b>RPE-HUMAN</b>                                       | c(cor = -0.466313818237304)  | 0.99904062373978 |
| <b>PLSL-HUMAN</b>                                      | c(cor = -0.12279871537045)   | 0.99904062373978 |
| <b>DAZP1-HUMAN</b>                                     | c(cor = -0.329653494176232)  | 0.99904062373978 |
| <b>THTM-HUMAN</b>                                      | c(cor = -0.297191117808386)  | 0.99904062373978 |
| <b>OLA1-HUMAN</b>                                      | c(cor = -0.161040849530169)  | 0.99904062373978 |
| <b>TAGL2-HUMAN</b>                                     | c(cor = -0.271912761381624)  | 0.99904062373978 |
| <b>TBCA-HUMAN</b>                                      | c(cor = -0.493849814206698)  | 0.99904062373978 |
| <b>PSB1-HUMAN</b>                                      | c(cor = -0.18390973485708)   | 0.99904062373978 |

|                                            |                               |                  |
|--------------------------------------------|-------------------------------|------------------|
| <b>CO2-HUMAN</b>                           | c(cor = -0.460019119491325)   | 0.99904062373978 |
| <b>SUMO3-HUMAN;SUMO2-HUMAN;SUMO4-HUMAN</b> | c(cor = -0.10261158139321)    | 0.99904062373978 |
| <b>HV551-HUMAN</b>                         | c(cor = -0.247822464299069)   | 0.99904062373978 |
| <b>PSMD9-HUMAN</b>                         | c(cor = 0.181827387862851)    | 0.99904062373978 |
| <b>PGRP2-HUMAN</b>                         | c(cor = -0.354551926792814)   | 0.99904062373978 |
| <b>AMBP-HUMAN</b>                          | c(cor = -0.152244569883228)   | 0.99904062373978 |
| <b>ESTD-HUMAN</b>                          | c(cor = -0.0201694215230899)  | 0.99904062373978 |
| <b>TCPD-HUMAN</b>                          | c(cor = -0.256767165950372)   | 0.99904062373978 |
| <b>ELNE-HUMAN</b>                          | c(cor = 0.0749445791752602)   | 0.99904062373978 |
| <b>NSF1C-HUMAN</b>                         | c(cor = -0.215510474617908)   | 0.99904062373978 |
| <b>TTHY-HUMAN</b>                          | c(cor = -0.439131928402155)   | 0.99904062373978 |
| <b>PUR9-HUMAN</b>                          | c(cor = 0.0608712666515361)   | 0.99904062373978 |
| <b>GLOD4-HUMAN</b>                         | c(cor = 0.0718769027101117)   | 0.99904062373978 |
| <b>AL1L1-HUMAN</b>                         | c(cor = -0.0823782906248872)  | 0.99904062373978 |
| <b>IGD-HUMAN</b>                           | c(cor = -0.161374421264072)   | 0.99904062373978 |
| <b>TKT-HUMAN</b>                           | c(cor = -0.00736791963357074) | 0.99904062373978 |
| <b>TLN1-HUMAN</b>                          | c(cor = -0.27473082481559)    | 0.99904062373978 |
| <b>CYTB-HUMAN</b>                          | c(cor = 0.183219504320643)    | 0.99904062373978 |
| <b>LIMS1-HUMAN</b>                         | c(cor = -0.248399438963908)   | 0.99904062373978 |
| <b>ENOG-HUMAN</b>                          | c(cor = -0.0641923537918932)  | 0.99904062373978 |
| <b>PRTN3-HUMAN</b>                         | c(cor = 0.101400585912253)    | 0.99904062373978 |
| <b>A2GL-HUMAN</b>                          | c(cor = -0.176966651760694)   | 0.99904062373978 |
| <b>AATC-HUMAN</b>                          | c(cor = -0.0642993253450529)  | 0.99904062373978 |
| <b>GSH1-HUMAN</b>                          | c(cor = -0.367587582936034)   | 0.99904062373978 |
| <b>HBE-HUMAN</b>                           | c(cor = 0.151274997875797)    | 0.99904062373978 |
| <b>LV325-HUMAN</b>                         | c(cor = -0.306636154511568)   | 0.99904062373978 |
| <b>HINT1-HUMAN</b>                         | c(cor = 0.00658548168756516)  | 0.99904062373978 |
| <b>KVD15-HUMAN</b>                         | c(cor = -0.0896535134357702)  | 0.99904062373978 |
| <b>CO6-HUMAN</b>                           | c(cor = -0.052463650279389)   | 0.99904062373978 |
| <b>SH3L1-HUMAN</b>                         | c(cor = -0.1773379319543)     | 0.99904062373978 |
| <b>HV330-HUMAN;HVC05-HUMAN</b>             | c(cor = -0.403585310762128)   | 0.99904062373978 |
| <b>CO8A-HUMAN</b>                          | c(cor = -0.412667109258756)   | 0.99904062373978 |
| <b>URP2-HUMAN</b>                          | c(cor = -0.273839933720047)   | 0.99904062373978 |
| <b>HV601-HUMAN</b>                         | c(cor = -0.235845328644741)   | 0.99904062373978 |
| <b>UBAC1-HUMAN</b>                         | c(cor = -0.199140221474445)   | 0.99904062373978 |
| <b>LV151-HUMAN</b>                         | c(cor = -0.133700179199573)   | 0.99904062373978 |
| <b>HEM4-HUMAN</b>                          | c(cor = -0.318870289846193)   | 0.99904062373978 |
| <b>PSB4-HUMAN</b>                          | c(cor = -0.0655710571246436)  | 0.99904062373978 |
| <b>TEBP-HUMAN</b>                          | c(cor = -0.0320853159073206)  | 0.99904062373978 |
| <b>PRS4-HUMAN</b>                          | c(cor = -0.0544133214602397)  | 0.99904062373978 |
| <b>ZA2G-HUMAN</b>                          | c(cor = -0.39036926887284)    | 0.99904062373978 |
| <b>HV70D-HUMAN</b>                         | c(cor = -0.141667406553275)   | 0.99904062373978 |
| <b>MOES-HUMAN</b>                          | c(cor = -0.205605528528735)   | 0.99904062373978 |
| <b>APMAP-HUMAN</b>                         | c(cor = -0.00640159151112996) | 0.99904062373978 |
| <b>SNAA-HUMAN</b>                          | c(cor = -0.52816280240322)    | 0.99904062373978 |
| <b>FLOT1-HUMAN</b>                         | c(cor = 0.0256001546486644)   | 0.99904062373978 |
| <b>PSA6-HUMAN</b>                          | c(cor = -0.407679072103545)   | 0.99904062373978 |
| <b>CUTA-HUMAN</b>                          | c(cor = 0.237301657827889)    | 0.99904062373978 |
| <b>PSA3-HUMAN</b>                          | c(cor = -0.324422283391102)   | 0.99904062373978 |

|                                |                              |                  |
|--------------------------------|------------------------------|------------------|
| <b>UB2D3-HUMAN;UB2D2-HUMAN</b> | c(cor = -0.329659748090452)  | 0.99904062373978 |
| <b>ANM5-HUMAN</b>              | c(cor = -0.354065015002484)  | 0.99904062373978 |
| <b>LV743-HUMAN</b>             | c(cor = -0.268957524005868)  | 0.99904062373978 |
| <b>ITA2B-HUMAN</b>             | c(cor = -0.033326808494776)  | 0.99904062373978 |
| <b>SEPP1-HUMAN</b>             | c(cor = -0.466321008647134)  | 0.99904062373978 |
| <b>CATG-HUMAN</b>              | c(cor = 0.077901401011126)   | 0.99904062373978 |
| <b>UB2L3-HUMAN</b>             | c(cor = -0.178637232753913)  | 0.99904062373978 |
| <b>LKHA4-HUMAN</b>             | c(cor = -0.0220756852960116) | 0.99904062373978 |
| <b>CO8G-HUMAN</b>              | c(cor = -0.180348484937147)  | 0.99904062373978 |
| <b>LXN-HUMAN</b>               | c(cor = 0.308247896744752)   | 0.99904062373978 |
| <b>H4-HUMAN</b>                | c(cor = -0.0420830263020282) | 0.99904062373978 |
| <b>TCPA-HUMAN</b>              | c(cor = -0.280206301077964)  | 0.99904062373978 |
| <b>PERM-HUMAN</b>              | c(cor = -0.0859446186929751) | 0.99904062373978 |
| <b>DPP3-HUMAN</b>              | c(cor = 0.0242353955041995)  | 0.99904062373978 |
| <b>IDHC-HUMAN</b>              | c(cor = -0.144141338346935)  | 0.99904062373978 |
| <b>MCTS1-HUMAN</b>             | c(cor = 0.0167438701910554)  | 0.99904062373978 |
| <b>RAP1A-HUMAN</b>             | c(cor = 0.105537512163604)   | 0.99904062373978 |
| <b>HV432-HUMAN</b>             | c(cor = 0.138653262461609)   | 0.99904062373978 |
| <b>CHSP1-HUMAN</b>             | c(cor = -0.239271723224266)  | 0.99904062373978 |
| <b>HBM-HUMAN</b>               | c(cor = 0.0679184360528276)  | 0.99904062373978 |
| <b>K2C6A-HUMAN</b>             | c(cor = 0.0624399692513013)  | 0.99904062373978 |
| <b>CAZA1-HUMAN</b>             | c(cor = 0.00777392003848261) | 0.99904062373978 |
| <b>ANXA7-HUMAN</b>             | c(cor = -0.186635407488119)  | 0.99904062373978 |
| <b>HV338-HUMAN</b>             | c(cor = -0.27945121319602)   | 0.99904062373978 |
| <b>G6PD-HUMAN</b>              | c(cor = -0.14661615526887)   | 0.99904062373978 |
| <b>G6PI-HUMAN</b>              | c(cor = 0.26578802860576)    | 0.99904062373978 |
| <b>OTU1-HUMAN</b>              | c(cor = 0.0931491236752187)  | 0.99904062373978 |
| <b>DNP1-HUMAN</b>              | c(cor = -0.0320732204243913) | 0.99904062373978 |
| <b>OXSR1-HUMAN</b>             | c(cor = -0.10284748200097)   | 0.99904062373978 |
| <b>PSME2-HUMAN</b>             | c(cor = -0.278432895895658)  | 0.99904062373978 |
| <b>KV139-HUMAN;KVD39-HUMAN</b> | c(cor = -0.268425202541189)  | 0.99904062373978 |
| <b>RHOA-HUMAN</b>              | c(cor = -0.308577452645864)  | 0.99904062373978 |
| <b>MYL6-HUMAN</b>              | c(cor = -0.190861498622489)  | 0.99904062373978 |
| <b>CPN2-HUMAN</b>              | c(cor = -0.180796327169804)  | 0.99904062373978 |
| <b>PSB6-HUMAN</b>              | c(cor = -0.232367457853223)  | 0.99904062373978 |
| <b>GSHB-HUMAN</b>              | c(cor = -0.354946201130595)  | 0.99904062373978 |
| <b>FAAA-HUMAN</b>              | c(cor = 0.103679620293189)   | 0.99904062373978 |
| <b>UBE2K-HUMAN</b>             | c(cor = 0.0791403633690516)  | 0.99904062373978 |
| <b>MYH9-HUMAN</b>              | c(cor = -0.424350756550681)  | 0.99904062373978 |
| <b>PI42A-HUMAN</b>             | c(cor = -0.161231395130417)  | 0.99904062373978 |
| <b>C1RL-HUMAN</b>              | c(cor = -0.378598235952472)  | 0.99904062373978 |
| <b>RANG-HUMAN</b>              | c(cor = -0.400317237549196)  | 0.99904062373978 |
| <b>THIC-HUMAN</b>              | c(cor = -0.0947179718836678) | 0.99904062373978 |
| <b>DCXR-HUMAN</b>              | c(cor = -0.4213575270303)    | 0.99904062373978 |
| <b>PA1B2-HUMAN</b>             | c(cor = 0.0300994154764218)  | 0.99904062373978 |
| <b>KPYM-HUMAN</b>              | c(cor = -0.258806434873098)  | 0.99904062373978 |
| <b>HABP2-HUMAN</b>             | c(cor = -0.376729254186649)  | 0.99904062373978 |
| <b>UBE2O-HUMAN</b>             | c(cor = -0.0858973479107974) | 0.99904062373978 |
| <b>VINC-HUMAN</b>              | c(cor = -0.208952575416141)  | 0.99904062373978 |



|                                       |                              |                    |
|---------------------------------------|------------------------------|--------------------|
| <b>PP2AA-HUMAN</b>                    | c(cor = 0.0163262866998799)  | 0.99904062373978   |
| <b>ALDOC-HUMAN</b>                    | c(cor = 0.656739843829011)   | 0.0160853389685454 |
| <b>PRPS2-HUMAN</b>                    | c(cor = -0.0265081202863347) | 0.99904062373978   |
| <b>PON1-HUMAN</b>                     | c(cor = -0.100928539107027)  | 0.99904062373978   |
| <b>HGFL-HUMAN</b>                     | c(cor = -0.2519189444962)    | 0.99904062373978   |
| <b>GPX3-HUMAN</b>                     | c(cor = -0.0262182607771088) | 0.99904062373978   |
| <b>RLA2-HUMAN</b>                     | c(cor = -0.196400548582742)  | 0.99904062373978   |
| <b>PSB5-HUMAN</b>                     | c(cor = -0.192007563474267)  | 0.99904062373978   |
| <b>H14-HUMAN</b>                      | c(cor = 0.122897596466173)   | 0.99904062373978   |
| <b>CO8B-HUMAN</b>                     | c(cor = -0.467922993379384)  | 0.99904062373978   |
| <b>6PGL-HUMAN</b>                     | c(cor = 0.0655930739180926)  | 0.99904062373978   |
| <b>CBPB2-HUMAN</b>                    | c(cor = -0.236926409639231)  | 0.99904062373978   |
| <b>HV64D-HUMAN</b>                    | c(cor = -0.381289216807031)  | 0.99904062373978   |
| <b>TETN-HUMAN</b>                     | c(cor = -0.294791101662748)  | 0.99904062373978   |
| <b>GLPC-HUMAN</b>                     | c(cor = 0.127786063436981)   | 0.99904062373978   |
| <b>PEDF-HUMAN</b>                     | c(cor = -0.486000647173624)  | 0.99904062373978   |
| <b>H31-HUMAN;H31T-HUMAN;H32-HUMAN</b> | c(cor = -0.252519010782087)  | 0.99904062373978   |
| <b>UBP15-HUMAN</b>                    | c(cor = -0.217584346030441)  | 0.99904062373978   |
| <b>GSH0-HUMAN</b>                     | c(cor = 0.139762508389916)   | 0.99904062373978   |
| <b>PRS7-HUMAN</b>                     | c(cor = -0.0281305382187784) | 0.99904062373978   |
| <b>PGBM-HUMAN</b>                     | c(cor = 0.155254029417778)   | 0.99904062373978   |
| <b>PGAM1-HUMAN</b>                    | c(cor = -0.365973152876155)  | 0.99904062373978   |
| <b>CSN4-HUMAN</b>                     | c(cor = -0.208302549100994)  | 0.99904062373978   |
| <b>PSB7-HUMAN</b>                     | c(cor = -0.345158990093087)  | 0.99904062373978   |
| <b>NP1L4-HUMAN</b>                    | c(cor = -0.203900016977945)  | 0.99904062373978   |
| <b>KV108-HUMAN</b>                    | c(cor = -0.428381068844003)  | 0.99904062373978   |
| <b>FN3K-HUMAN</b>                     | c(cor = -0.0750088405748896) | 0.99904062373978   |
| <b>HV313-HUMAN</b>                    | c(cor = -0.21499828565829)   | 0.99904062373978   |
| <b>ACTN1-HUMAN</b>                    | c(cor = -0.282294649379241)  | 0.99904062373978   |
| <b>HV404-HUMAN</b>                    | c(cor = -0.234348123133739)  | 0.99904062373978   |
| <b>RAB1B-HUMAN</b>                    | c(cor = 0.00791401960845732) | 0.99904062373978   |
| <b>ANXA3-HUMAN</b>                    | c(cor = 0.0109968544534973)  | 0.99904062373978   |
| <b>AP2S1-HUMAN</b>                    | c(cor = -0.107664561823162)  | 0.99904062373978   |
| <b>LYSC-HUMAN</b>                     | c(cor = -0.402465930426318)  | 0.99904062373978   |
| <b>CAP1-HUMAN</b>                     | c(cor = -0.0196946224095917) | 0.99904062373978   |
| <b>XPO7-HUMAN</b>                     | c(cor = 0.250978715907788)   | 0.99904062373978   |
| <b>GMPR1-HUMAN</b>                    | c(cor = 0.184521556675074)   | 0.99904062373978   |
| <b>THBG-HUMAN</b>                     | c(cor = -0.364797300449616)  | 0.99904062373978   |
| <b>NLTP-HUMAN</b>                     | c(cor = -0.0785759545369538) | 0.99904062373978   |
| <b>PEPD-HUMAN</b>                     | c(cor = 0.134728558060981)   | 0.99904062373978   |
| <b>RN123-HUMAN</b>                    | c(cor = -0.16987773334787)   | 0.99904062373978   |
| <b>RAB5B-HUMAN</b>                    | c(cor = -0.488927849268104)  | 0.99904062373978   |
| <b>KCY-HUMAN</b>                      | c(cor = 0.0563416822097104)  | 0.99904062373978   |
| <b>CBPN-HUMAN</b>                     | c(cor = -0.0699969180067188) | 0.99904062373978   |
| <b>PRDX5-HUMAN</b>                    | c(cor = -0.0927283766756957) | 0.99904062373978   |
| <b>TNG2-HUMAN</b>                     | c(cor = -0.216319518946266)  | 0.99904062373978   |
| <b>ABHEB-HUMAN</b>                    | c(cor = -0.494722153906044)  | 0.99904062373978   |
| <b>PA2G4-HUMAN</b>                    | c(cor = 0.169666645420311)   | 0.99904062373978   |
| <b>CD47-HUMAN</b>                     | c(cor = -0.153543913623171)  | 0.99904062373978   |

|                                |                              |                   |
|--------------------------------|------------------------------|-------------------|
| <b>TMOD1-HUMAN</b>             | c(cor = -0.225555046802238)  | 0.99904062373978  |
| <b>TBA1B-HUMAN</b>             | c(cor = -0.0545557731931362) | 0.99904062373978  |
| <b>C1R-HUMAN</b>               | c(cor = -0.355032602904887)  | 0.99904062373978  |
| <b>KVD33-HUMAN;KV133-HUMAN</b> | c(cor = -0.211091140419182)  | 0.99904062373978  |
| <b>TBB4B-HUMAN</b>             | c(cor = -0.206111396113542)  | 0.99904062373978  |
| <b>PRS6A-HUMAN</b>             | c(cor = -0.0927631776572972) | 0.99904062373978  |
| <b>ARPC5-HUMAN</b>             | c(cor = -0.0790680671393907) | 0.99904062373978  |
| <b>ETFA-HUMAN</b>              | c(cor = 0.015721055365686)   | 0.99904062373978  |
| <b>UHL3-HUMAN</b>              | c(cor = -0.029388204200723)  | 0.99904062373978  |
| <b>APT-HUMAN</b>               | c(cor = -0.229103202274426)  | 0.99904062373978  |
| <b>FA10-HUMAN</b>              | c(cor = -0.513396197908733)  | 0.99904062373978  |
| <b>PCBP1-HUMAN</b>             | c(cor = -0.0459484976727032) | 0.99904062373978  |
| <b>F13A-HUMAN</b>              | c(cor = -0.391206825491533)  | 0.99904062373978  |
| <b>DHPR-HUMAN</b>              | c(cor = -0.373641458620894)  | 0.99904062373978  |
| <b>ITIH3-HUMAN</b>             | c(cor = -0.0627288426784536) | 0.99904062373978  |
| <b>WBP2-HUMAN</b>              | c(cor = -0.384092907896701)  | 0.99904062373978  |
| <b>ARGI1-HUMAN</b>             | c(cor = 0.0499757185699023)  | 0.99904062373978  |
| <b>IF6-HUMAN</b>               | c(cor = -0.030507345585213)  | 0.99904062373978  |
| <b>TPP2-HUMAN</b>              | c(cor = -0.268242782228425)  | 0.99904062373978  |
| <b>PSMD5-HUMAN</b>             | c(cor = -0.0805336705765636) | 0.99904062373978  |
| <b>ARK72-HUMAN</b>             | c(cor = -0.490142798576198)  | 0.99904062373978  |
| <b>ML12B-HUMAN;ML12A-HUMAN</b> | c(cor = -0.186038833833653)  | 0.99904062373978  |
| <b>GGCT-HUMAN</b>              | c(cor = -0.396359014409015)  | 0.99904062373978  |
| <b>GET3-HUMAN</b>              | c(cor = -0.334320918010683)  | 0.99904062373978  |
| <b>CBR1-HUMAN</b>              | c(cor = -0.0754856246713125) | 0.99904062373978  |
| <b>PUR4-HUMAN</b>              | c(cor = -0.188640975252133)  | 0.99904062373978  |
| <b>SAMP-HUMAN</b>              | c(cor = -0.575117065894326)  | 0.286502559342318 |
| <b>HV372-HUMAN</b>             | c(cor = -0.206901895638674)  | 0.99904062373978  |
| <b>CSN1-HUMAN</b>              | c(cor = -0.0763436387937446) | 0.99904062373978  |
| <b>FHR2-HUMAN</b>              | c(cor = -0.341547761295677)  | 0.99904062373978  |
| <b>TPM1-HUMAN</b>              | c(cor = -0.0683209031085074) | 0.99904062373978  |
| <b>PFKAL-HUMAN</b>             | c(cor = -0.369611739712701)  | 0.99904062373978  |
| <b>HSP74-HUMAN</b>             | c(cor = -0.369800783854117)  | 0.99904062373978  |
| <b>KPRB-HUMAN</b>              | c(cor = -0.312065340449041)  | 0.99904062373978  |
| <b>FA9-HUMAN</b>               | c(cor = -0.325543557577788)  | 0.99904062373978  |
| <b>PGP-HUMAN</b>               | c(cor = 0.136992751178258)   | 0.99904062373978  |
| <b>KRT83-HUMAN</b>             | c(cor = -0.248152304999965)  | 0.99904062373978  |
| <b>TENA-HUMAN</b>              | c(cor = -0.092193317895074)  | 0.99904062373978  |
| <b>PUR8-HUMAN</b>              | c(cor = -0.17083993166062)   | 0.99904062373978  |
| <b>CT027-HUMAN</b>             | c(cor = -0.350939722363401)  | 0.99904062373978  |
| <b>S14L4-HUMAN</b>             | c(cor = 0.0668697718752585)  | 0.99904062373978  |
| <b>CBG-HUMAN</b>               | c(cor = -0.503395971679801)  | 0.99904062373978  |
| <b>CYBR1-HUMAN</b>             | c(cor = -0.276567694906565)  | 0.99904062373978  |
| <b>LEG3-HUMAN</b>              | c(cor = 0.151447345191993)   | 0.99904062373978  |
| <b>DCNL1-HUMAN</b>             | c(cor = 0.143467511474356)   | 0.99904062373978  |
| <b>ICLN-HUMAN</b>              | c(cor = 0.0684875627290644)  | 0.99904062373978  |
| <b>1433G-HUMAN</b>             | c(cor = 0.149062502321077)   | 0.99904062373978  |
| <b>RD23B-HUMAN</b>             | c(cor = -0.138632414577717)  | 0.99904062373978  |
| <b>FHR4-HUMAN</b>              | c(cor = -0.111002985025463)  | 0.99904062373978  |

|                                |                               |                  |
|--------------------------------|-------------------------------|------------------|
| <b>FLOT2-HUMAN</b>             | c(cor = -0.117240762311611)   | 0.99904062373978 |
| <b>KV137-HUMAN;KVD37-HUMAN</b> | c(cor = -0.405151118117525)   | 0.99904062373978 |
| <b>FCN3-HUMAN</b>              | c(cor = -0.407388211755151)   | 0.99904062373978 |
| <b>UB2V2-HUMAN</b>             | c(cor = -0.0148362914783214)  | 0.99904062373978 |
| <b>1433T-HUMAN</b>             | c(cor = -0.366520137317794)   | 0.99904062373978 |
| <b>RB11A-HUMAN;RB11B-HUMAN</b> | c(cor = 0.0619140720708263)   | 0.99904062373978 |
| <b>TBA1A-HUMAN</b>             | c(cor = -0.199438559447092)   | 0.99904062373978 |
| <b>LIS1-HUMAN</b>              | c(cor = -0.0271057608251226)  | 0.99904062373978 |
| <b>AL9A1-HUMAN</b>             | c(cor = -0.104949739823729)   | 0.99904062373978 |
| <b>RUVB2-HUMAN</b>             | c(cor = -0.266493410644738)   | 0.99904062373978 |
| <b>TTL12-HUMAN</b>             | c(cor = -0.150507547323489)   | 0.99904062373978 |
| <b>PPME1-HUMAN</b>             | c(cor = -0.166164103579505)   | 0.99904062373978 |
| <b>SIA10-HUMAN</b>             | c(cor = -0.252161581395082)   | 0.99904062373978 |
| <b>CLH1-HUMAN</b>              | c(cor = -0.196173899421863)   | 0.99904062373978 |
| <b>PCBP2-HUMAN</b>             | c(cor = -0.029881763274798)   | 0.99904062373978 |
| <b>ACTZ-HUMAN</b>              | c(cor = -0.0621661172369772)  | 0.99904062373978 |
| <b>MTAP-HUMAN</b>              | c(cor = -0.187227417244101)   | 0.99904062373978 |
| <b>PP1R7-HUMAN</b>             | c(cor = 0.185705704314268)    | 0.99904062373978 |
| <b>HV102-HUMAN</b>             | c(cor = -0.101613457948729)   | 0.99904062373978 |
| <b>NSF-HUMAN</b>               | c(cor = -0.282710518978502)   | 0.99904062373978 |
| <b>DESP-HUMAN</b>              | c(cor = -0.302953644671378)   | 0.99904062373978 |
| <b>KAIN-HUMAN</b>              | c(cor = -0.343810955869735)   | 0.99904062373978 |
| <b>FETUB-HUMAN</b>             | c(cor = -0.427470048293603)   | 0.99904062373978 |
| <b>TBA4A-HUMAN</b>             | c(cor = -0.0529283273406734)  | 0.99904062373978 |
| <b>PERE-HUMAN</b>              | c(cor = 0.0483807559973571)   | 0.99904062373978 |
| <b>H15-HUMAN</b>               | c(cor = -0.15168622250146)    | 0.99904062373978 |
| <b>VATA-HUMAN</b>              | c(cor = -0.149420989107704)   | 0.99904062373978 |
| <b>GDIR2-HUMAN</b>             | c(cor = -0.372330196162407)   | 0.99904062373978 |
| <b>VCAM1-HUMAN</b>             | c(cor = -0.372840961445654)   | 0.99904062373978 |
| <b>A16A1-HUMAN</b>             | c(cor = -0.268616416960995)   | 0.99904062373978 |
| <b>PTGDS-HUMAN</b>             | c(cor = -0.0871851095959352)  | 0.99904062373978 |
| <b>PSB3-HUMAN</b>              | c(cor = -0.333351933607403)   | 0.99904062373978 |
| <b>UGPA-HUMAN</b>              | c(cor = 0.000891213461395714) | 0.99904062373978 |
| <b>PLEK-HUMAN</b>              | c(cor = -0.235664467246484)   | 0.99904062373978 |
| <b>PSA2-HUMAN</b>              | c(cor = 0.0354924877916789)   | 0.99904062373978 |
| <b>HV428-HUMAN</b>             | c(cor = -0.280823655105225)   | 0.99904062373978 |
| <b>IPO9-HUMAN</b>              | c(cor = -0.169793960492186)   | 0.99904062373978 |
| <b>GLRX3-HUMAN</b>             | c(cor = -0.0162374673071272)  | 0.99904062373978 |
| <b>TXD17-HUMAN</b>             | c(cor = -0.20190722101253)    | 0.99904062373978 |
| <b>CD59-HUMAN</b>              | c(cor = -0.381331236768029)   | 0.99904062373978 |
| <b>FSCN1-HUMAN</b>             | c(cor = -0.16573504791785)    | 0.99904062373978 |
| <b>RIDA-HUMAN</b>              | c(cor = -0.15513833652679)    | 0.99904062373978 |
| <b>LANC1-HUMAN</b>             | c(cor = -0.190888421174082)   | 0.99904062373978 |
| <b>RHCE-HUMAN</b>              | c(cor = -0.0206642685800708)  | 0.99904062373978 |
| <b>PDC6I-HUMAN</b>             | c(cor = -0.110674415322267)   | 0.99904062373978 |
| <b>KJ01-HUMAN</b>              | c(cor = -0.255588448956059)   | 0.99904062373978 |
| <b>FBLN1-HUMAN</b>             | c(cor = -0.236778722033336)   | 0.99904062373978 |
| <b>HV364-HUMAN</b>             | c(cor = -0.331044691160793)   | 0.99904062373978 |
| <b>PSDE-HUMAN</b>              | c(cor = -0.186984477213872)   | 0.99904062373978 |

|                                                    |                               |                   |
|----------------------------------------------------|-------------------------------|-------------------|
| <b>VWF-HUMAN</b>                                   | c(cor = -0.338581288052595)   | 0.99904062373978  |
| <b>CAPZB-HUMAN</b>                                 | c(cor = -0.110597099284913)   | 0.99904062373978  |
| <b>PHLD-HUMAN</b>                                  | c(cor = -0.35943048086855)    | 0.99904062373978  |
| <b>PPIL3-HUMAN</b>                                 | c(cor = -0.320956482789605)   | 0.99904062373978  |
| <b>KV117-HUMAN</b>                                 | c(cor = -0.301624348006138)   | 0.99904062373978  |
| <b>RASK-HUMAN</b>                                  | c(cor = -0.225466521901195)   | 0.99904062373978  |
| <b>LV208-HUMAN</b>                                 | c(cor = -0.388684614761983)   | 0.99904062373978  |
| <b>IF4B-HUMAN</b>                                  | c(cor = -0.0255050643043265)  | 0.99904062373978  |
| <b>PGM2L-HUMAN</b>                                 | c(cor = 0.0689653669922147)   | 0.99904062373978  |
| <b>2AAB-HUMAN</b>                                  | c(cor = -0.277067812690912)   | 0.99904062373978  |
| <b>PRS10-HUMAN</b>                                 | c(cor = -0.132859295602032)   | 0.99904062373978  |
| <b>DYN2-HUMAN</b>                                  | c(cor = -0.190217436727349)   | 0.99904062373978  |
| <b>CYB5-HUMAN</b>                                  | c(cor = -0.0605608031344107)  | 0.99904062373978  |
| <b>GSTM3-HUMAN</b>                                 | c(cor = -0.373273039981271)   | 0.99904062373978  |
| <b>NB5R3-HUMAN</b>                                 | c(cor = 0.0864187808624429)   | 0.99904062373978  |
| <b>PROF1-HUMAN</b>                                 | c(cor = -0.238320776695924)   | 0.99904062373978  |
| <b>HV124-HUMAN</b>                                 | c(cor = -0.250812838871242)   | 0.99904062373978  |
| <b>ADT2-HUMAN;ADT1-HUMAN;ADT3-HUMAN;ADT4-HUMAN</b> | c(cor = -0.320814175464798)   | 0.99904062373978  |
| <b>LV949-HUMAN</b>                                 | c(cor = -0.00604602404301392) | 0.99904062373978  |
| <b>ANXA1-HUMAN</b>                                 | c(cor = 0.0136573497892362)   | 0.99904062373978  |
| <b>IF2G-HUMAN</b>                                  | c(cor = -0.152077204511186)   | 0.99904062373978  |
| <b>BROX-HUMAN</b>                                  | c(cor = -0.560648718652129)   | 0.441596537440559 |
| <b>CNRP1-HUMAN</b>                                 | c(cor = -0.198515271886752)   | 0.99904062373978  |
| <b>MGST2-HUMAN</b>                                 | c(cor = 0.374269522506171)    | 0.99904062373978  |
| <b>PRG2-HUMAN</b>                                  | c(cor = -0.185939045103309)   | 0.99904062373978  |
| <b>FABP5-HUMAN</b>                                 | c(cor = -0.368443641349382)   | 0.99904062373978  |
| <b>IPYR-HUMAN</b>                                  | c(cor = -0.0217123228600787)  | 0.99904062373978  |
| <b>KVD16-HUMAN</b>                                 | c(cor = -0.122714157797461)   | 0.99904062373978  |
| <b>MISSL-HUMAN</b>                                 | c(cor = 0.365961260803399)    | 0.99904062373978  |
| <b>CUL3-HUMAN</b>                                  | c(cor = -0.0543729329678761)  | 0.99904062373978  |
| <b>DDB1-HUMAN</b>                                  | c(cor = -0.135819227482431)   | 0.99904062373978  |
| <b>NGAL-HUMAN</b>                                  | c(cor = -0.293381595670384)   | 0.99904062373978  |
| <b>RAB10-HUMAN</b>                                 | c(cor = 0.035289308996156)    | 0.99904062373978  |
| <b>IMA4-HUMAN</b>                                  | c(cor = 0.106109689048119)    | 0.99904062373978  |
| <b>LV211-HUMAN</b>                                 | c(cor = -0.39077991807372)    | 0.99904062373978  |
| <b>IGF2-HUMAN</b>                                  | c(cor = -0.422571442434818)   | 0.99904062373978  |
| <b>RAP2B-HUMAN</b>                                 | c(cor = 0.0309732940527564)   | 0.99904062373978  |
| <b>PSMD6-HUMAN</b>                                 | c(cor = -0.130902175688503)   | 0.99904062373978  |
| <b>TBB5-HUMAN</b>                                  | c(cor = -0.0706577189829394)  | 0.99904062373978  |
| <b>RAB35-HUMAN</b>                                 | c(cor = 0.20921420165119)     | 0.99904062373978  |
| <b>KV240-HUMAN;KVD40-HUMAN</b>                     | c(cor = -0.310443748352252)   | 0.99904062373978  |
| <b>LASP1-HUMAN</b>                                 | c(cor = -0.414628867546656)   | 0.99904062373978  |
| <b>PSMD1-HUMAN</b>                                 | c(cor = -0.171984426726147)   | 0.99904062373978  |
| <b>CI040-HUMAN</b>                                 | c(cor = -0.00302244508440233) | 0.99904062373978  |
| <b>MIEN1-HUMAN</b>                                 | c(cor = -0.199536017279869)   | 0.99904062373978  |
| <b>KVD08-HUMAN</b>                                 | c(cor = -0.111192954086717)   | 0.99904062373978  |
| <b>TBB1-HUMAN</b>                                  | c(cor = 0.0547927592794664)   | 0.99904062373978  |
| <b>EHD1-HUMAN</b>                                  | c(cor = -0.246598069294115)   | 0.99904062373978  |
| <b>MEP50-HUMAN</b>                                 | c(cor = 0.0820088091448433)   | 0.99904062373978  |

|                                |                               |                   |
|--------------------------------|-------------------------------|-------------------|
| <b>PRS8-HUMAN</b>              | c(cor = -0.213009871308445)   | 0.99904062373978  |
| <b>HV343-HUMAN</b>             | c(cor = -0.0706477778574204)  | 0.99904062373978  |
| <b>COR1A-HUMAN</b>             | c(cor = -0.0582112509226437)  | 0.99904062373978  |
| <b>GBB1-HUMAN</b>              | c(cor = -0.34170682252684)    | 0.99904062373978  |
| <b>RSU1-HUMAN</b>              | c(cor = -0.154340979573033)   | 0.99904062373978  |
| <b>UFC1-HUMAN</b>              | c(cor = -0.219707372813658)   | 0.99904062373978  |
| <b>FA5-HUMAN</b>               | c(cor = -0.418560696893934)   | 0.99904062373978  |
| <b>SRXN1-HUMAN</b>             | c(cor = -0.158827185003157)   | 0.99904062373978  |
| <b>ABRAL-HUMAN</b>             | c(cor = 0.279495174662866)    | 0.99904062373978  |
| <b>FPPS-HUMAN</b>              | c(cor = -0.129027840030783)   | 0.99904062373978  |
| <b>PDCD6-HUMAN</b>             | c(cor = 0.0522934628956228)   | 0.99904062373978  |
| <b>STAM1-HUMAN</b>             | c(cor = -0.00923233923781499) | 0.99904062373978  |
| <b>C1TC-HUMAN</b>              | c(cor = -0.0417340456544081)  | 0.99904062373978  |
| <b>PSD10-HUMAN</b>             | c(cor = -0.166642437620705)   | 0.99904062373978  |
| <b>GRHPR-HUMAN</b>             | c(cor = 0.00104871279307838)  | 0.99904062373978  |
| <b>PSMD4-HUMAN</b>             | c(cor = -0.0186103037868055)  | 0.99904062373978  |
| <b>MK01-HUMAN</b>              | c(cor = -0.571033136184557)   | 0.324259162812141 |
| <b>SYDC-HUMAN</b>              | c(cor = -0.469141313385984)   | 0.99904062373978  |
| <b>C4BPB-HUMAN</b>             | c(cor = -0.495400218984325)   | 0.99904062373978  |
| <b>MASP1-HUMAN</b>             | c(cor = -0.0570500707529785)  | 0.99904062373978  |
| <b>CRKL-HUMAN</b>              | c(cor = -0.254442780625722)   | 0.99904062373978  |
| <b>GDIR1-HUMAN</b>             | c(cor = -0.347951271664719)   | 0.99904062373978  |
| <b>LV140-HUMAN</b>             | c(cor = -0.267638577041156)   | 0.99904062373978  |
| <b>CDC42-HUMAN</b>             | c(cor = 0.134850546323068)    | 0.99904062373978  |
| <b>HNRPD-HUMAN</b>             | c(cor = -0.202804742406754)   | 0.99904062373978  |
| <b>ATRN-HUMAN</b>              | c(cor = -0.421607723572018)   | 0.99904062373978  |
| <b>UBA5-HUMAN</b>              | c(cor = 0.126428253242597)    | 0.99904062373978  |
| <b>GAPD1-HUMAN</b>             | c(cor = -0.0462187162303017)  | 0.99904062373978  |
| <b>PFKAM-HUMAN</b>             | c(cor = -0.304295808373548)   | 0.99904062373978  |
| <b>RLA0-HUMAN;RLA0L-HUMAN</b>  | c(cor = -0.242148514892409)   | 0.99904062373978  |
| <b>CMBL-HUMAN</b>              | c(cor = -0.131315500641232)   | 0.99904062373978  |
| <b>OTUB1-HUMAN</b>             | c(cor = -0.154385816294714)   | 0.99904062373978  |
| <b>NUDC2-HUMAN</b>             | c(cor = -0.110310035519457)   | 0.99904062373978  |
| <b>CSN7B-HUMAN</b>             | c(cor = -0.072292436568921)   | 0.99904062373978  |
| <b>PROP-HUMAN</b>              | c(cor = -0.149793647606876)   | 0.99904062373978  |
| <b>KV105-HUMAN</b>             | c(cor = -0.0936647975952449)  | 0.99904062373978  |
| <b>MYL4-HUMAN</b>              | c(cor = -0.252140165876858)   | 0.99904062373978  |
| <b>GDIA-HUMAN</b>              | c(cor = -0.351151238642897)   | 0.99904062373978  |
| <b>HV349-HUMAN</b>             | c(cor = -0.410450679227864)   | 0.99904062373978  |
| <b>ADHX-HUMAN</b>              | c(cor = -0.0476239782405219)  | 0.99904062373978  |
| <b>CZIB-HUMAN</b>              | c(cor = -0.141729043136604)   | 0.99904062373978  |
| <b>CISD2-HUMAN</b>             | c(cor = -0.136053526722087)   | 0.99904062373978  |
| <b>KAP0-HUMAN</b>              | c(cor = -0.136949690513221)   | 0.99904062373978  |
| <b>FUMH-HUMAN</b>              | c(cor = -0.307112031809788)   | 0.99904062373978  |
| <b>F13B-HUMAN</b>              | c(cor = -0.479589257939032)   | 0.99904062373978  |
| <b>AP1B1-HUMAN</b>             | c(cor = 0.0680296098326184)   | 0.99904062373978  |
| <b>LBP-HUMAN</b>               | c(cor = -0.169783465380978)   | 0.99904062373978  |
| <b>EF1A1-HUMAN;EF1A3-HUMAN</b> | c(cor = 0.11404195388818)     | 0.99904062373978  |
| <b>RAB6A-HUMAN</b>             | c(cor = -0.446796088336602)   | 0.99904062373978  |

|                    |                              |                  |
|--------------------|------------------------------|------------------|
| <b>FBLN3-HUMAN</b> | c(cor = -0.292840224990033)  | 0.99904062373978 |
| <b>CD14-HUMAN</b>  | c(cor = -0.234577835738831)  | 0.99904062373978 |
| <b>VIME-HUMAN</b>  | c(cor = 0.240470126048467)   | 0.99904062373978 |
| <b>AGO2-HUMAN</b>  | c(cor = -0.529450273064582)  | 0.99904062373978 |
| <b>S10AC-HUMAN</b> | c(cor = -0.163480892646771)  | 0.99904062373978 |
| <b>PLPP-HUMAN</b>  | c(cor = -0.350988188018344)  | 0.99904062373978 |
| <b>PSMD7-HUMAN</b> | c(cor = -0.131852596529833)  | 0.99904062373978 |
| <b>IPO7-HUMAN</b>  | c(cor = -0.0539604699383976) | 0.99904062373978 |
| <b>HNRPK-HUMAN</b> | c(cor = -0.345109041111026)  | 0.99904062373978 |
| <b>VATB2-HUMAN</b> | c(cor = -0.466397161281164)  | 0.99904062373978 |
| <b>RFESD-HUMAN</b> | c(cor = -0.186883364327635)  | 0.99904062373978 |
| <b>NIF3L-HUMAN</b> | c(cor = 0.0819988210431465)  | 0.99904062373978 |
| <b>KT3K-HUMAN</b>  | c(cor = -0.0546306596937184) | 0.99904062373978 |
| <b>NEDD8-HUMAN</b> | c(cor = -0.0489563202697285) | 0.99904062373978 |
| <b>ERMAP-HUMAN</b> | c(cor = -0.0618919043416171) | 0.99904062373978 |
| <b>TKFC-HUMAN</b>  | c(cor = -0.178767327794766)  | 0.99904062373978 |
| <b>DYL2-HUMAN</b>  | c(cor = -0.265241675695938)  | 0.99904062373978 |
| <b>ATG3-HUMAN</b>  | c(cor = -0.0361400325505994) | 0.99904062373978 |
| <b>ACYP1-HUMAN</b> | c(cor = -0.271802260912697)  | 0.99904062373978 |
| <b>AMPL-HUMAN</b>  | c(cor = -0.283630342095819)  | 0.99904062373978 |
| <b>LV218-HUMAN</b> | c(cor = 0.180138249020993)   | 0.99904062373978 |
| <b>PSD13-HUMAN</b> | c(cor = 0.0268972369678774)  | 0.99904062373978 |
| <b>GP1BB-HUMAN</b> | c(cor = -0.335064830961595)  | 0.99904062373978 |
| <b>HGFA-HUMAN</b>  | c(cor = -0.126462011212632)  | 0.99904062373978 |
| <b>AT2B4-HUMAN</b> | c(cor = -0.12822790680745)   | 0.99904062373978 |
| <b>GP1BA-HUMAN</b> | c(cor = -0.177660918506108)  | 0.99904062373978 |
| <b>SMIM1-HUMAN</b> | c(cor = -0.473377586705732)  | 0.99904062373978 |
| <b>THOP1-HUMAN</b> | c(cor = -0.0305408247944788) | 0.99904062373978 |
| <b>GSTT1-HUMAN</b> | c(cor = -0.0202866973459412) | 0.99904062373978 |
| <b>ANXA5-HUMAN</b> | c(cor = -0.0734684979955012) | 0.99904062373978 |
| <b>QSOX1-HUMAN</b> | c(cor = -0.229944687638912)  | 0.99904062373978 |
| <b>ITB3-HUMAN</b>  | c(cor = -0.278375277458276)  | 0.99904062373978 |
| <b>CARM1-HUMAN</b> | c(cor = -0.164694336596187)  | 0.99904062373978 |
| <b>LV214-HUMAN</b> | c(cor = -0.451639615894883)  | 0.99904062373978 |
| <b>RAB18-HUMAN</b> | c(cor = -0.0378356388865249) | 0.99904062373978 |
| <b>CSN3-HUMAN</b>  | c(cor = -0.502043816888245)  | 0.99904062373978 |
| <b>CD9-HUMAN</b>   | c(cor = -0.260146379201053)  | 0.99904062373978 |
| <b>LV136-HUMAN</b> | c(cor = 0.159533761699745)   | 0.99904062373978 |
| <b>DNJB2-HUMAN</b> | c(cor = -0.15956123448802)   | 0.99904062373978 |
| <b>ECM1-HUMAN</b>  | c(cor = -0.354649902817001)  | 0.99904062373978 |
| <b>OSCAR-HUMAN</b> | c(cor = -0.21116241959352)   | 0.99904062373978 |
| <b>PDIA6-HUMAN</b> | c(cor = -0.182779193150548)  | 0.99904062373978 |
| <b>HV146-HUMAN</b> | c(cor = 0.169426949044417)   | 0.99904062373978 |
| <b>PPCS-HUMAN</b>  | c(cor = 0.194604736808879)   | 0.99904062373978 |
| <b>ALS-HUMAN</b>   | c(cor = -0.230805392791293)  | 0.99904062373978 |
| <b>SHBG-HUMAN</b>  | c(cor = 0.00372824547267688) | 0.99904062373978 |
| <b>PLTP-HUMAN</b>  | c(cor = -0.284604973354285)  | 0.99904062373978 |
| <b>SYWC-HUMAN</b>  | c(cor = -0.199136951288353)  | 0.99904062373978 |
| <b>GAPR1-HUMAN</b> | c(cor = -0.162952721653007)  | 0.99904062373978 |

|             |                              |                    |
|-------------|------------------------------|--------------------|
| ARPC2-HUMAN | c(cor = -0.0736976632675768) | 0.99904062373978   |
| KTHY-HUMAN  | c(cor = -0.0634605081562639) | 0.99904062373978   |
| DNJB1-HUMAN | c(cor = -0.0304148820035215) | 0.99904062373978   |
| CD44-HUMAN  | c(cor = -0.409122018052504)  | 0.99904062373978   |
| LV657-HUMAN | c(cor = -0.103443674279225)  | 0.99904062373978   |
| CAMP-HUMAN  | c(cor = 0.0334326273087099)  | 0.99904062373978   |
| CDK2-HUMAN  | c(cor = 0.0941270190617255)  | 0.99904062373978   |
| AMPN-HUMAN  | c(cor = 0.396649028394583)   | 0.99904062373978   |
| HV205-HUMAN | c(cor = -0.0161487228437355) | 0.99904062373978   |
| CSN6-HUMAN  | c(cor = -0.338683550492488)  | 0.99904062373978   |
| GNPI1-HUMAN | c(cor = 0.171795444909544)   | 0.99904062373978   |
| IF2A-HUMAN  | c(cor = -0.19494313104647)   | 0.99904062373978   |
| UBR4-HUMAN  | c(cor = 0.0674674019792199)  | 0.99904062373978   |
| IPO5-HUMAN  | c(cor = -0.0930904980514972) | 0.99904062373978   |
| H13-HUMAN   | c(cor = -0.104310361268837)  | 0.99904062373978   |
| BPI-HUMAN   | c(cor = 0.0448737253259691)  | 0.99904062373978   |
| ILEU-HUMAN  | c(cor = -0.406970647184905)  | 0.99904062373978   |
| PSMD2-HUMAN | c(cor = -0.31275299226397)   | 0.99904062373978   |
| HV145-HUMAN | c(cor = -0.0669375120155266) | 0.99904062373978   |
| MET7A-HUMAN | c(cor = 0.0612854883905372)  | 0.99904062373978   |
| AP2M1-HUMAN | c(cor = -0.246408990656067)  | 0.99904062373978   |
| AP2A1-HUMAN | c(cor = -0.293595074181074)  | 0.99904062373978   |
| TYB10-HUMAN | c(cor = -0.0739873629957261) | 0.99904062373978   |
| LYPA1-HUMAN | c(cor = 0.200014713887421)   | 0.99904062373978   |
| PSD11-HUMAN | c(cor = 0.00143425705015495) | 0.99904062373978   |
| RUVB1-HUMAN | c(cor = -0.192047669848914)  | 0.99904062373978   |
| GMFG-HUMAN  | c(cor = -0.148470330658164)  | 0.99904062373978   |
| IDE-HUMAN   | c(cor = -0.502093398090903)  | 0.99904062373978   |
| RS10-HUMAN  | c(cor = 0.61415797437656)    | 0.0799653730866883 |
| AK1A1-HUMAN | c(cor = -0.178874099835554)  | 0.99904062373978   |
| RAP1B-HUMAN | c(cor = -0.341387325686054)  | 0.99904062373978   |
| CYTC-HUMAN  | c(cor = -0.223975281306754)  | 0.99904062373978   |
| CRLF3-HUMAN | c(cor = -0.2170560159591)    | 0.99904062373978   |
| CRP-HUMAN   | c(cor = -0.113534865246666)  | 0.99904062373978   |
| PPIB-HUMAN  | c(cor = -0.351659206300787)  | 0.99904062373978   |
| IF4E-HUMAN  | c(cor = -0.014407315670737)  | 0.99904062373978   |
| ARP2-HUMAN  | c(cor = -0.232300568945068)  | 0.99904062373978   |
| MARE1-HUMAN | c(cor = -0.262425714130637)  | 0.99904062373978   |
| APOC4-HUMAN | c(cor = -0.364753110907303)  | 0.99904062373978   |
| APOF-HUMAN  | c(cor = -0.237311917452957)  | 0.99904062373978   |
| KV116-HUMAN | c(cor = -0.421445549585872)  | 0.99904062373978   |
| PYRG1-HUMAN | c(cor = -0.104197530503352)  | 0.99904062373978   |
| EIF3J-HUMAN | c(cor = 0.166224707152903)   | 0.99904062373978   |
| EF2-HUMAN   | c(cor = -0.196250812812097)  | 0.99904062373978   |
| ZYX-HUMAN   | c(cor = -0.242679188683135)  | 0.99904062373978   |
| CSN8-HUMAN  | c(cor = -0.116161152611783)  | 0.99904062373978   |
| HBAZ-HUMAN  | c(cor = 0.126994183915562)   | 0.99904062373978   |
| AP2B1-HUMAN | c(cor = -0.0759091197243033) | 0.99904062373978   |
| RTN3-HUMAN  | c(cor = -0.586031091805659)  | 0.204179530916438  |

|                                            |                              |                  |
|--------------------------------------------|------------------------------|------------------|
| <b>PDE12-HUMAN</b>                         | c(cor = -0.286431448369015)  | 0.99904062373978 |
| <b>LV469-HUMAN</b>                         | c(cor = 0.109282798676973)   | 0.99904062373978 |
| <b>NUDT5-HUMAN</b>                         | c(cor = -0.196038657523286)  | 0.99904062373978 |
| <b>1433F-HUMAN</b>                         | c(cor = -0.206747234801126)  | 0.99904062373978 |
| <b>PSD12-HUMAN</b>                         | c(cor = 0.0627463607033483)  | 0.99904062373978 |
| <b>GMPR2-HUMAN</b>                         | c(cor = -0.311276565245723)  | 0.99904062373978 |
| <b>XPO1-HUMAN</b>                          | c(cor = -0.302007828690854)  | 0.99904062373978 |
| <b>PSMG3-HUMAN</b>                         | c(cor = 0.0104823100972063)  | 0.99904062373978 |
| <b>PZP-HUMAN</b>                           | c(cor = -0.138375148141019)  | 0.99904062373978 |
| <b>LV321-HUMAN</b>                         | c(cor = -0.437121747254317)  | 0.99904062373978 |
| <b>DCTN2-HUMAN</b>                         | c(cor = -0.164467922657368)  | 0.99904062373978 |
| <b>ANFY1-HUMAN</b>                         | c(cor = -0.333246813491704)  | 0.99904062373978 |
| <b>BID-HUMAN</b>                           | c(cor = -0.44926628638293)   | 0.99904062373978 |
| <b>PDIA3-HUMAN</b>                         | c(cor = -0.0924270209788488) | 0.99904062373978 |
| <b>TRML1-HUMAN</b>                         | c(cor = 0.00619657267988326) | 0.99904062373978 |
| <b>ENPL-HUMAN</b>                          | c(cor = 0.0530390706471619)  | 0.99904062373978 |
| <b>BGH3-HUMAN</b>                          | c(cor = -0.270300599210592)  | 0.99904062373978 |
| <b>CNDP2-HUMAN</b>                         | c(cor = -0.010258131545234)  | 0.99904062373978 |
| <b>PSA-HUMAN</b>                           | c(cor = -0.089576239814887)  | 0.99904062373978 |
| <b>CLCA-HUMAN</b>                          | c(cor = -0.271849150822892)  | 0.99904062373978 |
| <b>ADIPO-HUMAN</b>                         | c(cor = -0.162969958577435)  | 0.99904062373978 |
| <b>LV223-HUMAN</b>                         | c(cor = 0.156694927476086)   | 0.99904062373978 |
| <b>P5CR3-HUMAN</b>                         | c(cor = -0.0432187950432143) | 0.99904062373978 |
| <b>PIPNA-HUMAN</b>                         | c(cor = -0.284111899583591)  | 0.99904062373978 |
| <b>DBNL-HUMAN</b>                          | c(cor = -0.352388828886507)  | 0.99904062373978 |
| <b>RTCA-HUMAN</b>                          | c(cor = -0.131977695862604)  | 0.99904062373978 |
| <b>CFAD-HUMAN</b>                          | c(cor = -0.264686664078454)  | 0.99904062373978 |
| <b>UBXN1-HUMAN</b>                         | c(cor = -0.211195446399388)  | 0.99904062373978 |
| <b>DNJC9-HUMAN</b>                         | c(cor = 0.0155927621603454)  | 0.99904062373978 |
| <b>PP1G-HUMAN;PP1A-HUMAN;PP1B-HUMAN</b>    | c(cor = 0.11705442362648)    | 0.99904062373978 |
| <b>MNDA-HUMAN</b>                          | c(cor = -0.127267369396074)  | 0.99904062373978 |
| <b>HSPB1-HUMAN</b>                         | c(cor = -0.175713635275618)  | 0.99904062373978 |
| <b>CUL1-HUMAN</b>                          | c(cor = -0.471773600046115)  | 0.99904062373978 |
| <b>AK1C3-HUMAN</b>                         | c(cor = -0.14156833817907)   | 0.99904062373978 |
| <b>CHLE-HUMAN</b>                          | c(cor = -0.146739502834318)  | 0.99904062373978 |
| <b>GRAN-HUMAN</b>                          | c(cor = 0.133786584923926)   | 0.99904062373978 |
| <b>GMPPB-HUMAN</b>                         | c(cor = -0.408991732522538)  | 0.99904062373978 |
| <b>VPS4B-HUMAN;FIGL1-HUMAN;VPS4A-HUMAN</b> | c(cor = -0.242895847296832)  | 0.99904062373978 |
| <b>RHG01-HUMAN</b>                         | c(cor = 0.0209824275860511)  | 0.99904062373978 |
| <b>KELL-HUMAN</b>                          | c(cor = -0.129338071854856)  | 0.99904062373978 |
| <b>ACES-HUMAN</b>                          | c(cor = -0.323291514718855)  | 0.99904062373978 |
| <b>PHP14-HUMAN</b>                         | c(cor = -0.0602229956914522) | 0.99904062373978 |
| <b>CAZA2-HUMAN</b>                         | c(cor = 0.234578841572922)   | 0.99904062373978 |
| <b>CAVN2-HUMAN</b>                         | c(cor = -0.361420642009034)  | 0.99904062373978 |
| <b>ORN-HUMAN</b>                           | c(cor = -0.359542768099462)  | 0.99904062373978 |
| <b>CAP7-HUMAN</b>                          | c(cor = -0.236728095583892)  | 0.99904062373978 |
| <b>IAH1-HUMAN</b>                          | c(cor = -0.136062913129932)  | 0.99904062373978 |
| <b>UT1-HUMAN</b>                           | c(cor = -0.216930758151104)  | 0.99904062373978 |
| <b>KGUA-HUMAN</b>                          | c(cor = -0.0958618351797572) | 0.99904062373978 |



|             |                              |                   |
|-------------|------------------------------|-------------------|
| ICAM2-HUMAN | c(cor = -0.0858070154012816) | 0.99904062373978  |
| PHS2-HUMAN  | c(cor = -0.182530601769144)  | 0.99904062373978  |
| PRG3-HUMAN  | c(cor = 0.0672073325262783)  | 0.99904062373978  |
| CPIN1-HUMAN | c(cor = -0.199899727767361)  | 0.99904062373978  |
| SGTA-HUMAN  | c(cor = 0.0471444275197282)  | 0.99904062373978  |
| SGT1-HUMAN  | c(cor = -0.182379008557277)  | 0.99904062373978  |
| ARPC3-HUMAN | c(cor = -0.235595659338825)  | 0.99904062373978  |
| ATPB-HUMAN  | c(cor = 0.0511436749213904)  | 0.99904062373978  |
| LRC20-HUMAN | c(cor = 0.0793419477525326)  | 0.99904062373978  |
| IF4A2-HUMAN | c(cor = -0.123186666463726)  | 0.99904062373978  |
| STX7-HUMAN  | c(cor = -0.147429467801969)  | 0.99904062373978  |
| DSG2-HUMAN  | c(cor = -0.0802320506036843) | 0.99904062373978  |
| RAGP1-HUMAN | c(cor = -0.200515562845445)  | 0.99904062373978  |
| IBP6-HUMAN  | c(cor = -0.073098418155487)  | 0.99904062373978  |
| IPSP-HUMAN  | c(cor = -0.407148246691331)  | 0.99904062373978  |
| KV621-HUMAN | c(cor = -0.203157579676695)  | 0.99904062373978  |
| CDC37-HUMAN | c(cor = -0.11419976022858)   | 0.99904062373978  |
| PRS6B-HUMAN | c(cor = -0.243957083515254)  | 0.99904062373978  |
| BLMH-HUMAN  | c(cor = -0.398266772262945)  | 0.99904062373978  |
| PLIN3-HUMAN | c(cor = -0.168158819886358)  | 0.99904062373978  |
| ARPC4-HUMAN | c(cor = -0.1706710154186)    | 0.99904062373978  |
| NIT1-HUMAN  | c(cor = -0.20484887450726)   | 0.99904062373978  |
| FA11-HUMAN  | c(cor = -0.375327416600594)  | 0.99904062373978  |
| NQO2-HUMAN  | c(cor = -0.0255659897223495) | 0.99904062373978  |
| PIN1-HUMAN  | c(cor = -0.207257539138737)  | 0.99904062373978  |
| ENDD1-HUMAN | c(cor = 0.314811660941595)   | 0.99904062373978  |
| XPO2-HUMAN  | c(cor = 0.0382221357709919)  | 0.99904062373978  |
| VATG1-HUMAN | c(cor = -0.583542367484909)  | 0.220753210401455 |
| GMDS-HUMAN  | c(cor = -0.461657366140213)  | 0.99904062373978  |
| RBX1-HUMAN  | c(cor = -0.222381804933483)  | 0.99904062373978  |
| TSN-HUMAN   | c(cor = -0.359844927962908)  | 0.99904062373978  |
| KAPCA-HUMAN | c(cor = -0.215849717775158)  | 0.99904062373978  |
| PSMD3-HUMAN | c(cor = -0.144112587685323)  | 0.99904062373978  |
| MTPN-HUMAN  | c(cor = -0.118747388678162)  | 0.99904062373978  |
| PNPO-HUMAN  | c(cor = -0.0317738342510607) | 0.99904062373978  |
| CRAC1-HUMAN | c(cor = 0.195792368675792)   | 0.99904062373978  |
| TMX1-HUMAN  | c(cor = 0.314126610191496)   | 0.99904062373978  |
| IMA3-HUMAN  | c(cor = -0.255897193594492)  | 0.99904062373978  |
| CSN2-HUMAN  | c(cor = -0.376516155917526)  | 0.99904062373978  |
| RAC2-HUMAN  | c(cor = -0.273727080440899)  | 0.99904062373978  |
| DHSO-HUMAN  | c(cor = -0.160091399926557)  | 0.99904062373978  |
| STMN1-HUMAN | c(cor = -0.137128217222263)  | 0.99904062373978  |
| MMP9-HUMAN  | c(cor = -0.122957232719846)  | 0.99904062373978  |
| DYL1-HUMAN  | c(cor = -0.235453315209716)  | 0.99904062373978  |
| FHR5-HUMAN  | c(cor = -0.432083567707482)  | 0.99904062373978  |
| PTN11-HUMAN | c(cor = -0.0263463963421301) | 0.99904062373978  |
| LHPP-HUMAN  | c(cor = 0.112641566475999)   | 0.99904062373978  |
| CETP-HUMAN  | c(cor = 0.0978742963889491)  | 0.99904062373978  |
| ULA1-HUMAN  | c(cor = -0.27890397244804)   | 0.99904062373978  |

|                    |                               |                  |
|--------------------|-------------------------------|------------------|
| <b>SYYC-HUMAN</b>  | c(cor = -0.00300317466453643) | 0.99904062373978 |
| <b>THG1-HUMAN</b>  | c(cor = -0.0936351352465562)  | 0.99904062373978 |
| <b>RGS10-HUMAN</b> | c(cor = -0.297213717980054)   | 0.99904062373978 |
| <b>S14L2-HUMAN</b> | c(cor = 0.0328740235110598)   | 0.99904062373978 |
| <b>PROC-HUMAN</b>  | c(cor = -0.002100942856115)   | 0.99904062373978 |
| <b>RBBP9-HUMAN</b> | c(cor = -0.385702164881956)   | 0.99904062373978 |
| <b>PDIA1-HUMAN</b> | c(cor = -0.189247217727315)   | 0.99904062373978 |
| <b>VASN-HUMAN</b>  | c(cor = 0.0457044015181284)   | 0.99904062373978 |
| <b>TBCEL-HUMAN</b> | c(cor = -0.0818753452601729)  | 0.99904062373978 |
| <b>BASI-HUMAN</b>  | c(cor = -0.0301369008191886)  | 0.99904062373978 |
| <b>IF5-HUMAN</b>   | c(cor = -0.0911990245148422)  | 0.99904062373978 |
| <b>BPNT1-HUMAN</b> | c(cor = -0.320131787408205)   | 0.99904062373978 |
| <b>GMFB-HUMAN</b>  | c(cor = 0.0893636064023773)   | 0.99904062373978 |
| <b>ATPA-HUMAN</b>  | c(cor = -0.349802020165379)   | 0.99904062373978 |
| <b>KC1A-HUMAN</b>  | c(cor = 0.144142649443762)    | 0.99904062373978 |
| <b>DHR11-HUMAN</b> | c(cor = -0.259193228873166)   | 0.99904062373978 |
| <b>IF1AX-HUMAN</b> | c(cor = -0.321787545924475)   | 0.99904062373978 |
| <b>HV315-HUMAN</b> | c(cor = -0.272783311390955)   | 0.99904062373978 |
| <b>MOT1-HUMAN</b>  | c(cor = -0.139098245743348)   | 0.99904062373978 |
| <b>ALDR-HUMAN</b>  | c(cor = -0.151907190784969)   | 0.99904062373978 |
| <b>RILP-HUMAN</b>  | c(cor = 0.125527412256603)    | 0.99904062373978 |
| <b>B2MG-HUMAN</b>  | c(cor = -0.226990421246944)   | 0.99904062373978 |
| <b>MVD1-HUMAN</b>  | c(cor = -0.47175572643403)    | 0.99904062373978 |
| <b>OSBP2-HUMAN</b> | c(cor = -0.233105511239858)   | 0.99904062373978 |
| <b>DHX9-HUMAN</b>  | c(cor = 0.330759997709047)    | 0.99904062373978 |
| <b>LFA3-HUMAN</b>  | c(cor = 0.0818385795416702)   | 0.99904062373978 |
| <b>IBP2-HUMAN</b>  | c(cor = -0.206724600040145)   | 0.99904062373978 |
| <b>NCHL1-HUMAN</b> | c(cor = -0.431855443501488)   | 0.99904062373978 |
| <b>RAB1A-HUMAN</b> | c(cor = -0.064187150644549)   | 0.99904062373978 |
| <b>BACH-HUMAN</b>  | c(cor = -0.173052473352508)   | 0.99904062373978 |
| <b>KPRA-HUMAN</b>  | c(cor = -0.287217733083362)   | 0.99904062373978 |
| <b>VATE1-HUMAN</b> | c(cor = -0.157484711905763)   | 0.99904062373978 |
| <b>IBP3-HUMAN</b>  | c(cor = -0.252661116508515)   | 0.99904062373978 |
| <b>MTNA-HUMAN</b>  | c(cor = -0.175210747585078)   | 0.99904062373978 |
| <b>FKBP4-HUMAN</b> | c(cor = 0.0144116113560853)   | 0.99904062373978 |
| <b>MP2K1-HUMAN</b> | c(cor = -0.410331641694332)   | 0.99904062373978 |
| <b>PPM1A-HUMAN</b> | c(cor = 0.0698250183299178)   | 0.99904062373978 |
| <b>LANC2-HUMAN</b> | c(cor = -0.472145787323169)   | 0.99904062373978 |
| <b>S100P-HUMAN</b> | c(cor = -0.00397363263255792) | 0.99904062373978 |
| <b>TIMP1-HUMAN</b> | c(cor = -0.250462144474707)   | 0.99904062373978 |
| <b>RAB2A-HUMAN</b> | c(cor = -0.288739310428228)   | 0.99904062373978 |
| <b>2A5D-HUMAN</b>  | c(cor = -0.0255546900943185)  | 0.99904062373978 |
| <b>ICAM4-HUMAN</b> | c(cor = 0.0541623663730435)   | 0.99904062373978 |
| <b>PDLI1-HUMAN</b> | c(cor = -0.299820146718517)   | 0.99904062373978 |
| <b>CRK-HUMAN</b>   | c(cor = -0.0780607186332038)  | 0.99904062373978 |
| <b>LSM3-HUMAN</b>  | c(cor = -0.129540931855074)   | 0.99904062373978 |
| <b>TCTP-HUMAN</b>  | c(cor = -0.160866241101958)   | 0.99904062373978 |
| <b>PP6R1-HUMAN</b> | c(cor = -0.520092689156856)   | 0.99904062373978 |
| <b>DNPEP-HUMAN</b> | c(cor = -0.514660012467533)   | 0.99904062373978 |

|                    |                              |                  |
|--------------------|------------------------------|------------------|
| <b>F1142-HUMAN</b> | c(cor = 0.0127035819208408)  | 0.99904062373978 |
| <b>ACTN4-HUMAN</b> | c(cor = -0.137472550601083)  | 0.99904062373978 |
| <b>RTN4-HUMAN</b>  | c(cor = 0.0447266026303565)  | 0.99904062373978 |
| <b>RSSA-HUMAN</b>  | c(cor = 0.136465617137824)   | 0.99904062373978 |
| <b>BIN2-HUMAN</b>  | c(cor = -0.146023338289796)  | 0.99904062373978 |
| <b>4EBP1-HUMAN</b> | c(cor = 0.0364767878961805)  | 0.99904062373978 |
| <b>BTD-HUMAN</b>   | c(cor = -0.33839487885957)   | 0.99904062373978 |
| <b>PFD5-HUMAN</b>  | c(cor = 0.163733347242194)   | 0.99904062373978 |
| <b>PIPNB-HUMAN</b> | c(cor = -0.220576585696654)  | 0.99904062373978 |
| <b>SPP24-HUMAN</b> | c(cor = -0.0921717601656354) | 0.99904062373978 |
| <b>SAA1-HUMAN</b>  | c(cor = -0.0090284551283231) | 0.99904062373978 |
| <b>METK2-HUMAN</b> | c(cor = -0.113084010421779)  | 0.99904062373978 |
| <b>ARP3-HUMAN</b>  | c(cor = -0.0795261257149486) | 0.99904062373978 |
| <b>COTL1-HUMAN</b> | c(cor = -0.040043242303039)  | 0.99904062373978 |
| <b>WNK1-HUMAN</b>  | c(cor = -0.352441874538682)  | 0.99904062373978 |
| <b>PCOC1-HUMAN</b> | c(cor = 0.0272865597303456)  | 0.99904062373978 |
| <b>NR2CA-HUMAN</b> | c(cor = 0.255260610328402)   | 0.99904062373978 |
| <b>GPIX-HUMAN</b>  | c(cor = -0.19536227815538)   | 0.99904062373978 |
| <b>FKBP3-HUMAN</b> | c(cor = -0.0860621900536646) | 0.99904062373978 |
| <b>RAB6B-HUMAN</b> | c(cor = -0.209077860977686)  | 0.99904062373978 |
| <b>ENOPH-HUMAN</b> | c(cor = -0.262845539481194)  | 0.99904062373978 |
| <b>ZPI-HUMAN</b>   | c(cor = -0.367929988845848)  | 0.99904062373978 |
| <b>UBC12-HUMAN</b> | c(cor = -0.141018984122664)  | 0.99904062373978 |
| <b>AQP1-HUMAN</b>  | c(cor = -0.0610540374614495) | 0.99904062373978 |
| <b>QSPP-HUMAN</b>  | c(cor = 0.0266595710100712)  | 0.99904062373978 |
| <b>HV226-HUMAN</b> | c(cor = -0.322509451952662)  | 0.99904062373978 |
| <b>AT2B1-HUMAN</b> | c(cor = -0.193036294763031)  | 0.99904062373978 |
| <b>HXK1-HUMAN</b>  | c(cor = -0.332878344944486)  | 0.99904062373978 |
| <b>CUL2-HUMAN</b>  | c(cor = -0.342020205982264)  | 0.99904062373978 |
| <b>DAF-HUMAN</b>   | c(cor = -0.29836163089173)   | 0.99904062373978 |
| <b>DEOC-HUMAN</b>  | c(cor = -0.24479572646814)   | 0.99904062373978 |
| <b>PTBP1-HUMAN</b> | c(cor = -0.0185860907795497) | 0.99904062373978 |
| <b>LCAT-HUMAN</b>  | c(cor = -0.197153924919937)  | 0.99904062373978 |
| <b>PLP2-HUMAN</b>  | c(cor = 0.355163924901178)   | 0.99904062373978 |
| <b>DIAP1-HUMAN</b> | c(cor = -0.0115897543257508) | 0.99904062373978 |
| <b>VAC14-HUMAN</b> | c(cor = 0.0953407746177485)  | 0.99904062373978 |
| <b>SHLB2-HUMAN</b> | c(cor = -0.100996957857493)  | 0.99904062373978 |
| <b>AT1A1-HUMAN</b> | c(cor = -0.31905982961775)   | 0.99904062373978 |
| <b>RAB7A-HUMAN</b> | c(cor = -0.483641318194721)  | 0.99904062373978 |
| <b>MDHM-HUMAN</b>  | c(cor = 0.222645084108652)   | 0.99904062373978 |
| <b>DNJA4-HUMAN</b> | c(cor = -0.0937148257968996) | 0.99904062373978 |
| <b>RAB21-HUMAN</b> | c(cor = 0.271790758296157)   | 0.99904062373978 |
| <b>SC22B-HUMAN</b> | c(cor = -0.439655465321095)  | 0.99904062373978 |
| <b>ENOF1-HUMAN</b> | c(cor = -0.12247953517923)   | 0.99904062373978 |
| <b>XPP1-HUMAN</b>  | c(cor = 0.250637194262539)   | 0.99904062373978 |
| <b>VASP-HUMAN</b>  | c(cor = -0.305948325603503)  | 0.99904062373978 |
| <b>CNDP1-HUMAN</b> | c(cor = -0.123569680299129)  | 0.99904062373978 |
| <b>ERF1-HUMAN</b>  | c(cor = -0.250113956398749)  | 0.99904062373978 |
| <b>ARLY-HUMAN</b>  | c(cor = -0.0992094935604971) | 0.99904062373978 |

|                    |                              |                  |
|--------------------|------------------------------|------------------|
| <b>COR1C-HUMAN</b> | c(cor = -0.0451634527041809) | 0.99904062373978 |
| <b>RAB5C-HUMAN</b> | c(cor = 0.0358742883616808)  | 0.99904062373978 |
| <b>TRXR1-HUMAN</b> | c(cor = 0.294323870280321)   | 0.99904062373978 |
| <b>IF1AY-HUMAN</b> | c(cor = -0.164507422843967)  | 0.99904062373978 |
| <b>FCGBP-HUMAN</b> | c(cor = -0.116396093959031)  | 0.99904062373978 |
| <b>NUDC1-HUMAN</b> | c(cor = 0.182648021190459)   | 0.99904062373978 |
| <b>AMPD3-HUMAN</b> | c(cor = -0.141352313610592)  | 0.99904062373978 |
| <b>RIC8A-HUMAN</b> | c(cor = 0.102953116023738)   | 0.99904062373978 |
| <b>AN32A-HUMAN</b> | c(cor = 0.210052100169089)   | 0.99904062373978 |
| <b>GNL1-HUMAN</b>  | c(cor = -0.229225481175972)  | 0.99904062373978 |
| <b>ARC1B-HUMAN</b> | c(cor = -0.0557677446200148) | 0.99904062373978 |
| <b>CHM4B-HUMAN</b> | c(cor = -0.0769991639896906) | 0.99904062373978 |
| <b>AP4A-HUMAN</b>  | c(cor = 0.0124697677238576)  | 0.99904062373978 |
| <b>KRT82-HUMAN</b> | c(cor = -0.425142506359337)  | 0.99904062373978 |
| <b>GANAB-HUMAN</b> | c(cor = 0.199831472842336)   | 0.99904062373978 |
| <b>HEBP2-HUMAN</b> | c(cor = -0.27093856330475)   | 0.99904062373978 |
| <b>HNRPF-HUMAN</b> | c(cor = -0.172273405469828)  | 0.99904062373978 |
| <b>AAMDC-HUMAN</b> | c(cor = 0.0220320020136003)  | 0.99904062373978 |
| <b>UBP7-HUMAN</b>  | c(cor = -0.0385600335529468) | 0.99904062373978 |
| <b>LG3BP-HUMAN</b> | c(cor = -0.350506380371619)  | 0.99904062373978 |
| <b>GPV-HUMAN</b>   | c(cor = -0.180218915179994)  | 0.99904062373978 |
| <b>CYRIB-HUMAN</b> | c(cor = -0.120260747296452)  | 0.99904062373978 |
| <b>GMPPA-HUMAN</b> | c(cor = -0.205528720305889)  | 0.99904062373978 |
| <b>FCN2-HUMAN</b>  | c(cor = -0.0152496080372353) | 0.99904062373978 |
| <b>USP9X-HUMAN</b> | c(cor = -0.418501393891335)  | 0.99904062373978 |
| <b>CN37-HUMAN</b>  | c(cor = 0.0722396368612661)  | 0.99904062373978 |
| <b>PYGL-HUMAN</b>  | c(cor = -0.212984675929031)  | 0.99904062373978 |
| <b>ILK-HUMAN</b>   | c(cor = -0.200345103233258)  | 0.99904062373978 |
| <b>PSMG1-HUMAN</b> | c(cor = 0.0603617133651021)  | 0.99904062373978 |
| <b>SRC8-HUMAN</b>  | c(cor = -0.143067587005615)  | 0.99904062373978 |
| <b>HDHD2-HUMAN</b> | c(cor = -0.040425735004661)  | 0.99904062373978 |
| <b>CHM4A-HUMAN</b> | c(cor = -0.114712891579891)  | 0.99904062373978 |
| <b>ABCB6-HUMAN</b> | c(cor = 0.0245105205963869)  | 0.99904062373978 |
| <b>TBC24-HUMAN</b> | c(cor = -0.215452803741722)  | 0.99904062373978 |
| <b>PARVB-HUMAN</b> | c(cor = 0.117123736929957)   | 0.99904062373978 |
| <b>CPPED-HUMAN</b> | c(cor = -0.331782609611409)  | 0.99904062373978 |
| <b>TMED2-HUMAN</b> | c(cor = -0.0186497908931921) | 0.99904062373978 |
| <b>FAS-HUMAN</b>   | c(cor = -0.148158562368994)  | 0.99904062373978 |
| <b>BIP-HUMAN</b>   | c(cor = -0.261165193525458)  | 0.99904062373978 |
| <b>ELOB-HUMAN</b>  | c(cor = -0.420394223620752)  | 0.99904062373978 |
| <b>YKT6-HUMAN</b>  | c(cor = 0.0637401223136498)  | 0.99904062373978 |
| <b>LV460-HUMAN</b> | c(cor = 0.163406423759157)   | 0.99904062373978 |
| <b>ITB2-HUMAN</b>  | c(cor = -0.15652620713893)   | 0.99904062373978 |
| <b>RADI-HUMAN</b>  | c(cor = 0.0983027332827556)  | 0.99904062373978 |
| <b>HNRPQ-HUMAN</b> | c(cor = -0.0965264736128903) | 0.99904062373978 |
| <b>COASY-HUMAN</b> | c(cor = -0.339016955343516)  | 0.99904062373978 |
| <b>PI16-HUMAN</b>  | c(cor = -0.0424625286034255) | 0.99904062373978 |
| <b>S10AB-HUMAN</b> | c(cor = -0.284010008160065)  | 0.99904062373978 |
| <b>UCHL5-HUMAN</b> | c(cor = -0.415813801049047)  | 0.99904062373978 |

|                                |                              |                  |
|--------------------------------|------------------------------|------------------|
| <b>LZIC-HUMAN</b>              | c(cor = 0.276475112965211)   | 0.99904062373978 |
| <b>HGS-HUMAN</b>               | c(cor = -0.212490214949246)  | 0.99904062373978 |
| <b>RS12-HUMAN</b>              | c(cor = -0.28511779171262)   | 0.99904062373978 |
| <b>TFR1-HUMAN</b>              | c(cor = -0.465979076347377)  | 0.99904062373978 |
| <b>IF2B-HUMAN</b>              | c(cor = 0.246730693760669)   | 0.99904062373978 |
| <b>ECP-HUMAN</b>               | c(cor = 0.084306907877349)   | 0.99904062373978 |
| <b>PUR2-HUMAN</b>              | c(cor = -0.0241573184126706) | 0.99904062373978 |
| <b>MASP2-HUMAN</b>             | c(cor = -0.23145277685864)   | 0.99904062373978 |
| <b>LYAM1-HUMAN</b>             | c(cor = -0.182250744113665)  | 0.99904062373978 |
| <b>MOB1B-HUMAN;MOB1A-HUMAN</b> | c(cor = -0.101686220792885)  | 0.99904062373978 |
| <b>CLIC2-HUMAN</b>             | c(cor = 0.23638557151329)    | 0.99904062373978 |
| <b>SIAS-HUMAN</b>              | c(cor = 0.12194931395781)    | 0.99904062373978 |
| <b>PRG4-HUMAN</b>              | c(cor = -0.251862296408487)  | 0.99904062373978 |
| <b>ADK-HUMAN</b>               | c(cor = -0.0419048440451103) | 0.99904062373978 |
| <b>TNPO1-HUMAN</b>             | c(cor = 0.0258600069677993)  | 0.99904062373978 |
| <b>ADPRS-HUMAN</b>             | c(cor = -0.23775899449562)   | 0.99904062373978 |
| <b>CADH5-HUMAN</b>             | c(cor = -0.411568134994034)  | 0.99904062373978 |
| <b>COMP-HUMAN</b>              | c(cor = -0.305323332306927)  | 0.99904062373978 |
| <b>KVD29-HUMAN;KV229-HUMAN</b> | c(cor = 0.179950758311563)   | 0.99904062373978 |
| <b>ACOC-HUMAN</b>              | c(cor = -0.0610511278608139) | 0.99904062373978 |
| <b>CRIS3-HUMAN</b>             | c(cor = -0.323890653508693)  | 0.99904062373978 |
| <b>LEG10-HUMAN</b>             | c(cor = -0.112193541361)     | 0.99904062373978 |
| <b>GPX4-HUMAN</b>              | c(cor = 0.00861458817134458) | 0.99904062373978 |
| <b>UBP47-HUMAN</b>             | c(cor = -0.359602323985925)  | 0.99904062373978 |
| <b>DCTN1-HUMAN</b>             | c(cor = 0.199917834291891)   | 0.99904062373978 |
| <b>CPNE1-HUMAN</b>             | c(cor = 0.0715664269798992)  | 0.99904062373978 |
| <b>PCYOX-HUMAN</b>             | c(cor = -0.146582901007112)  | 0.99904062373978 |
| <b>IBP5-HUMAN</b>              | c(cor = 0.185493864984665)   | 0.99904062373978 |
| <b>RAB14-HUMAN</b>             | c(cor = -0.157992407106697)  | 0.99904062373978 |
| <b>JAM1-HUMAN</b>              | c(cor = -0.115402401914259)  | 0.99904062373978 |
| <b>TBCB-HUMAN</b>              | c(cor = -0.275193987969293)  | 0.99904062373978 |
| <b>ERP44-HUMAN</b>             | c(cor = -0.290568279954593)  | 0.99904062373978 |
| <b>SRGN-HUMAN</b>              | c(cor = -0.197570856422072)  | 0.99904062373978 |
| <b>CALD1-HUMAN</b>             | c(cor = -0.162689729929205)  | 0.99904062373978 |
| <b>PLS1-HUMAN</b>              | c(cor = -0.482677648326528)  | 0.99904062373978 |
| <b>KS6A3-HUMAN</b>             | c(cor = -0.0881635795869825) | 0.99904062373978 |
| <b>EZRI-HUMAN</b>              | c(cor = 0.0253519683070457)  | 0.99904062373978 |
| <b>LV746-HUMAN</b>             | c(cor = -0.247137550710093)  | 0.99904062373978 |
| <b>KCMF1-HUMAN</b>             | c(cor = -0.200573190555303)  | 0.99904062373978 |
| <b>QORX-HUMAN</b>              | c(cor = -0.150397983583344)  | 0.99904062373978 |
| <b>PTRD1-HUMAN</b>             | c(cor = -0.309437438336456)  | 0.99904062373978 |
| <b>AT2A3-HUMAN</b>             | c(cor = -0.300209849452113)  | 0.99904062373978 |
| <b>LAT4-HUMAN</b>              | c(cor = -0.116048208334051)  | 0.99904062373978 |
| <b>SYCC-HUMAN</b>              | c(cor = -0.282174033122168)  | 0.99904062373978 |
| <b>LV316-HUMAN</b>             | c(cor = -0.258323105318076)  | 0.99904062373978 |
| <b>GTR3-HUMAN;GTR14-HUMAN</b>  | c(cor = -0.0899153432357494) | 0.99904062373978 |
| <b>KVD21-HUMAN</b>             | c(cor = 0.0981567060691078)  | 0.99904062373978 |
| <b>ELOC-HUMAN</b>              | c(cor = -0.395585163792658)  | 0.99904062373978 |
| <b>PEF1-HUMAN</b>              | c(cor = -0.0347849378120183) | 0.99904062373978 |

|                                |                               |                  |
|--------------------------------|-------------------------------|------------------|
| <b>RNAS1-HUMAN</b>             | c(cor = -0.34222530623255)    | 0.99904062373978 |
| <b>ATG4A-HUMAN</b>             | c(cor = 0.0160760298616153)   | 0.99904062373978 |
| <b>LYVE1-HUMAN</b>             | c(cor = -0.195594716246034)   | 0.99904062373978 |
| <b>MPCP-HUMAN</b>              | c(cor = -0.127942202218832)   | 0.99904062373978 |
| <b>IGE-HUMAN</b>               | c(cor = -0.0802532448905675)  | 0.99904062373978 |
| <b>ASAP1-HUMAN</b>             | c(cor = 0.000519616974193046) | 0.99904062373978 |
| <b>GNAI2-HUMAN</b>             | c(cor = -0.18404259182113)    | 0.99904062373978 |
| <b>SCFD1-HUMAN</b>             | c(cor = 0.0813336116334611)   | 0.99904062373978 |
| <b>CLIC4-HUMAN</b>             | c(cor = -0.00443969776727321) | 0.99904062373978 |
| <b>TSNAX-HUMAN</b>             | c(cor = -0.196880457587184)   | 0.99904062373978 |
| <b>GGEE3-HUMAN;PAGE2-HUMAN</b> | c(cor = 0.232472769163206)    | 0.99904062373978 |
| <b>GLGB-HUMAN</b>              | c(cor = -0.291055234480255)   | 0.99904062373978 |
| <b>DENR-HUMAN</b>              | c(cor = 0.327216474764447)    | 0.99904062373978 |
| <b>PGRP1-HUMAN</b>             | c(cor = -0.145781280027657)   | 0.99904062373978 |
| <b>SELO-HUMAN</b>              | c(cor = -0.163947295415641)   | 0.99904062373978 |
| <b>CD99-HUMAN</b>              | c(cor = -0.130641578505008)   | 0.99904062373978 |
| <b>VAMP2-HUMAN;VAMP3-HUMAN</b> | c(cor = -0.0938258808622186)  | 0.99904062373978 |
| <b>PSMD8-HUMAN</b>             | c(cor = 0.00960246789544205)  | 0.99904062373978 |
| <b>CH10-HUMAN</b>              | c(cor = -0.305011391699473)   | 0.99904062373978 |
| <b>WIPI1-HUMAN</b>             | c(cor = -0.36365525722282)    | 0.99904062373978 |
| <b>ANXA4-HUMAN</b>             | c(cor = 0.0377555821371823)   | 0.99904062373978 |
| <b>HMGN2-HUMAN</b>             | c(cor = -0.0668478490979389)  | 0.99904062373978 |
| <b>AMPB-HUMAN</b>              | c(cor = -0.277744329329266)   | 0.99904062373978 |
| <b>LTBP1-HUMAN</b>             | c(cor = -0.395861427058091)   | 0.99904062373978 |
| <b>EF1G-HUMAN</b>              | c(cor = -0.152660628158788)   | 0.99904062373978 |
| <b>GLU2B-HUMAN</b>             | c(cor = -0.358183932342269)   | 0.99904062373978 |
| <b>HMGB2-HUMAN</b>             | c(cor = -0.0740921210219794)  | 0.99904062373978 |
| <b>EF1D-HUMAN</b>              | c(cor = -0.262080332906342)   | 0.99904062373978 |
| <b>CALR-HUMAN</b>              | c(cor = -0.252393430653059)   | 0.99904062373978 |
| <b>CATD-HUMAN</b>              | c(cor = -0.28245859621647)    | 0.99904062373978 |
| <b>MMRN1-HUMAN</b>             | c(cor = -0.303957018693508)   | 0.99904062373978 |
| <b>CSRP1-HUMAN</b>             | c(cor = -0.421492807770962)   | 0.99904062373978 |
| <b>ERF3A-HUMAN</b>             | c(cor = -0.187247104946938)   | 0.99904062373978 |
| <b>PEBP4-HUMAN</b>             | c(cor = -0.220259330522154)   | 0.99904062373978 |
| <b>GNAI3-HUMAN</b>             | c(cor = -0.254811737242055)   | 0.99904062373978 |
| <b>UBA3-HUMAN</b>              | c(cor = -0.128487784399993)   | 0.99904062373978 |
| <b>TBG1-HUMAN;TBG2-HUMAN</b>   | c(cor = -0.36729373078086)    | 0.99904062373978 |
| <b>VTA1-HUMAN</b>              | c(cor = -0.183749305507748)   | 0.99904062373978 |
| <b>K1H1-HUMAN</b>              | c(cor = -0.0219446279348677)  | 0.99904062373978 |
| <b>RS17-HUMAN</b>              | c(cor = 0.184335166764568)    | 0.99904062373978 |
| <b>BCAM-HUMAN</b>              | c(cor = -0.0893182967862054)  | 0.99904062373978 |
| <b>YBOX3-HUMAN</b>             | c(cor = 0.165782100714467)    | 0.99904062373978 |
| <b>ISG15-HUMAN</b>             | c(cor = -0.400581853568038)   | 0.99904062373978 |
| <b>LV548-HUMAN</b>             | c(cor = -0.162208991501577)   | 0.99904062373978 |
| <b>NNRE-HUMAN</b>              | c(cor = 0.0602570549128655)   | 0.99904062373978 |
| <b>DPYL2-HUMAN</b>             | c(cor = -0.496403968050215)   | 0.99904062373978 |
| <b>BASP1-HUMAN</b>             | c(cor = -0.179540383323109)   | 0.99904062373978 |
| <b>XRP2-HUMAN</b>              | c(cor = -0.0187236994247065)  | 0.99904062373978 |
| <b>DOPO-HUMAN</b>              | c(cor = -0.129722134915934)   | 0.99904062373978 |

|             |                               |                  |
|-------------|-------------------------------|------------------|
| MBL2-HUMAN  | c(cor = -0.206846811697857)   | 0.99904062373978 |
| PURA-HUMAN  | c(cor = 0.0755511719370262)   | 0.99904062373978 |
| RHAG-HUMAN  | c(cor = 0.126871815166079)    | 0.99904062373978 |
| PSMG2-HUMAN | c(cor = -0.419927259041576)   | 0.99904062373978 |
| VP26B-HUMAN | c(cor = -0.142983706811634)   | 0.99904062373978 |
| SAA2-HUMAN  | c(cor = 0.00241272140576969)  | 0.99904062373978 |
| DNJA2-HUMAN | c(cor = -0.376344219726504)   | 0.99904062373978 |
| GLPA-HUMAN  | c(cor = -0.0257805535699884)  | 0.99904062373978 |
| PIGR-HUMAN  | c(cor = -0.0820186935031516)  | 0.99904062373978 |
| LMAN2-HUMAN | c(cor = -0.160953144606888)   | 0.99904062373978 |
| HCLS1-HUMAN | c(cor = -0.267367122997828)   | 0.99904062373978 |
| ANGI-HUMAN  | c(cor = -0.14024670634721)    | 0.99904062373978 |
| SPRC-HUMAN  | c(cor = -0.412013116204169)   | 0.99904062373978 |
| RAB2B-HUMAN | c(cor = -0.332595435310612)   | 0.99904062373978 |
| MP2K3-HUMAN | c(cor = -0.138498478641819)   | 0.99904062373978 |
| MP2K2-HUMAN | c(cor = -0.23814480071795)    | 0.99904062373978 |
| LA-HUMAN    | c(cor = -0.305813758456647)   | 0.99904062373978 |
| CSN7A-HUMAN | c(cor = -0.244581193624743)   | 0.99904062373978 |
| NRBP-HUMAN  | c(cor = 0.0620267247340258)   | 0.99904062373978 |
| HLAA-HUMAN  | c(cor = -0.15585582914222)    | 0.99904062373978 |
| PDCD5-HUMAN | c(cor = 0.169202395259065)    | 0.99904062373978 |
| CY24B-HUMAN | c(cor = -0.215495287092099)   | 0.99904062373978 |
| CD36-HUMAN  | c(cor = -0.144881841117867)   | 0.99904062373978 |
| SERC-HUMAN  | c(cor = 0.287354754156802)    | 0.99904062373978 |
| AHNK-HUMAN  | c(cor = -0.211639451056284)   | 0.99904062373978 |
| LAMP2-HUMAN | c(cor = -0.30447151911646)    | 0.99904062373978 |
| IDHP-HUMAN  | c(cor = -0.358408669278353)   | 0.99904062373978 |
| FCN1-HUMAN  | c(cor = -0.0903140643664067)  | 0.99904062373978 |
| PDIA4-HUMAN | c(cor = -0.306230612230064)   | 0.99904062373978 |
| FHL1-HUMAN  | c(cor = -0.149532607325298)   | 0.99904062373978 |
| CALX-HUMAN  | c(cor = -0.285372206044022)   | 0.99904062373978 |
| NEUG-HUMAN  | c(cor = -0.136019712065953)   | 0.99904062373978 |
| ITAM-HUMAN  | c(cor = 0.175034205303667)    | 0.99904062373978 |
| VNN1-HUMAN  | c(cor = -0.019625481022752)   | 0.99904062373978 |
| THAS-HUMAN  | c(cor = 0.087507194751175)    | 0.99904062373978 |
| ROA1-HUMAN  | c(cor = -0.321607256796336)   | 0.99904062373978 |
| HUWE1-HUMAN | c(cor = -0.151786532763859)   | 0.99904062373978 |
| PGTB2-HUMAN | c(cor = -0.291898119748009)   | 0.99904062373978 |
| YBOX1-HUMAN | c(cor = 0.106114267923658)    | 0.99904062373978 |
| PIEZ1-HUMAN | c(cor = -0.0578913863056333)  | 0.99904062373978 |
| SEM7A-HUMAN | c(cor = -0.13883441405894)    | 0.99904062373978 |
| RIR1-HUMAN  | c(cor = -0.146675049811889)   | 0.99904062373978 |
| SAC1-HUMAN  | c(cor = -0.334246461338007)   | 0.99904062373978 |
| LVX54-HUMAN | c(cor = -0.0293570521471055)  | 0.99904062373978 |
| PPP5-HUMAN  | c(cor = -0.0816953313387025)  | 0.99904062373978 |
| ADRM1-HUMAN | c(cor = 0.259075910711302)    | 0.99904062373978 |
| PLPL6-HUMAN | c(cor = 0.0260410943512949)   | 0.99904062373978 |
| SNP23-HUMAN | c(cor = -0.117384091779461)   | 0.99904062373978 |
| CH60-HUMAN  | c(cor = -0.00820122430071313) | 0.99904062373978 |

|                                |                              |                  |
|--------------------------------|------------------------------|------------------|
| <b>IGBP1-HUMAN</b>             | c(cor = 0.111035313270508)   | 0.99904062373978 |
| <b>DCA11-HUMAN</b>             | c(cor = -0.297986491860647)  | 0.99904062373978 |
| <b>GGH-HUMAN</b>               | c(cor = -0.109123249587567)  | 0.99904062373978 |
| <b>HV320-HUMAN</b>             | c(cor = -0.215166137980006)  | 0.99904062373978 |
| <b>PCNP-HUMAN</b>              | c(cor = 0.168228583254485)   | 0.99904062373978 |
| <b>H2AZ-HUMAN;H2AV-HUMAN</b>   | c(cor = -0.0587972603875595) | 0.99904062373978 |
| <b>TXND5-HUMAN</b>             | c(cor = -0.167485956798239)  | 0.99904062373978 |
| <b>AL5AP-HUMAN</b>             | c(cor = -0.231694179744765)  | 0.99904062373978 |
| <b>GNAS2-HUMAN;GNAS1-HUMAN</b> | c(cor = -0.0165359475014286) | 0.99904062373978 |
| <b>COIA1-HUMAN</b>             | c(cor = -0.340887067320104)  | 0.99904062373978 |
| <b>ROA2-HUMAN</b>              | c(cor = -0.031405993494187)  | 0.99904062373978 |
| <b>TTC38-HUMAN</b>             | c(cor = -0.0217211348462091) | 0.99904062373978 |
| <b>COL11-HUMAN</b>             | c(cor = -0.344822148175097)  | 0.99904062373978 |
| <b>ACSL3-HUMAN</b>             | c(cor = -0.399085124611188)  | 0.99904062373978 |
| <b>PROZ-HUMAN</b>              | c(cor = -0.123374307591958)  | 0.99904062373978 |
| <b>CAN5-HUMAN</b>              | c(cor = 0.0165449601650309)  | 0.99904062373978 |
| <b>PPP6-HUMAN</b>              | c(cor = -0.486194665814468)  | 0.99904062373978 |
| <b>LV545-HUMAN;LV539-HUMAN</b> | c(cor = -0.207787779078091)  | 0.99904062373978 |
| <b>S29A1-HUMAN</b>             | c(cor = -0.165998244406645)  | 0.99904062373978 |
| <b>KT33A-HUMAN</b>             | c(cor = 0.0320493805797334)  | 0.99904062373978 |
| <b>LAMP1-HUMAN</b>             | c(cor = -0.268344710609193)  | 0.99904062373978 |
| <b>VAPA-HUMAN</b>              | c(cor = -0.155822069096)     | 0.99904062373978 |
| <b>CAD13-HUMAN</b>             | c(cor = -0.189308189637914)  | 0.99904062373978 |
| <b>FCERG-HUMAN</b>             | c(cor = -0.439897295282151)  | 0.99904062373978 |
| <b>PTMA-HUMAN</b>              | c(cor = 0.117028466698353)   | 0.99904062373978 |
| <b>PLBL1-HUMAN</b>             | c(cor = -0.111259085376643)  | 0.99904062373978 |
| <b>S43A3-HUMAN</b>             | c(cor = -0.161359610528418)  | 0.99904062373978 |
| <b>CR1-HUMAN</b>               | c(cor = 0.0650344342940954)  | 0.99904062373978 |
| <b>S40A1-HUMAN</b>             | c(cor = -0.202453279055798)  | 0.99904062373978 |
| <b>MYG-HUMAN</b>               | c(cor = 0.257995082024513)   | 0.99904062373978 |
| <b>MRP4-HUMAN</b>              | c(cor = -0.151397999522882)  | 0.99904062373978 |
| <b>ARI2-HUMAN</b>              | c(cor = -0.361373601664358)  | 0.99904062373978 |
| <b>SNX3-HUMAN</b>              | c(cor = -0.285827863994142)  | 0.99904062373978 |
| <b>CIAO1-HUMAN</b>             | c(cor = -0.22697316503749)   | 0.99904062373978 |
| <b>EFHD2-HUMAN;EFHD1-HUMAN</b> | c(cor = -0.0115925240751714) | 0.99904062373978 |
| <b>RL7-HUMAN</b>               | c(cor = 0.0337578099778495)  | 0.99904062373978 |
| <b>MYH10-HUMAN</b>             | c(cor = -0.29383357906321)   | 0.99904062373978 |
| <b>REEP5-HUMAN</b>             | c(cor = -0.0844526246642403) | 0.99904062373978 |
| <b>K1C9-HUMAN</b>              | c(cor = -0.0834631744311981) | 0.99904062373978 |
| <b>COX41-HUMAN</b>             | c(cor = -0.271043639600525)  | 0.99904062373978 |
| <b>KRT35-HUMAN</b>             | c(cor = 0.0428468411757835)  | 0.99904062373978 |
| <b>ISK5-HUMAN</b>              | c(cor = -0.219045389053453)  | 0.99904062373978 |
| <b>C2C2L-HUMAN</b>             | c(cor = 0.064333597443607)   | 0.99904062373978 |
| <b>TPM2-HUMAN</b>              | c(cor = -0.0598397599536449) | 0.99904062373978 |
| <b>K22E-HUMAN</b>              | c(cor = -0.112151097475135)  | 0.99904062373978 |
| <b>ITB1-HUMAN</b>              | c(cor = -0.0811069108844359) | 0.99904062373978 |
| <b>KR111-HUMAN</b>             | c(cor = -0.235990305981181)  | 0.99904062373978 |
| <b>MPU1-HUMAN</b>              | c(cor = -0.167109015728211)  | 0.99904062373978 |
| <b>COX2-HUMAN</b>              | c(cor = -0.173022386508497)  | 0.99904062373978 |



|                    |                             |                  |
|--------------------|-----------------------------|------------------|
| <b>IGHD-HUMAN</b>  | c(cor = 0.0537139401382002) | 0.99904062373978 |
| <b>UTER-HUMAN</b>  | c(cor = -0.177038505871611) | 0.99904062373978 |
| <b>GUAA-HUMAN</b>  | c(cor = 0.0360526323087688) | 0.99904062373978 |
| <b>WFDC2-HUMAN</b> | c(cor = -0.359637288963737) | 0.99904062373978 |
| <b>AR6P1-HUMAN</b> | c(cor = 0.02156743851591)   | 0.99904062373978 |
| <b>SBSN-HUMAN</b>  | c(cor = 0.0666923029669058) | 0.99904062373978 |
| <b>CD177-HUMAN</b> | c(cor = -0.106539923288167) | 0.99904062373978 |
| <b>RDH11-HUMAN</b> | c(cor = -0.128962810211886) | 0.99904062373978 |
