# Supplementary material for: Systemic Blood Proteome Patterns Reflect Disease Phenotypes in Neovascular Age-Related Macular Degeneration
Source: MDPI journal article supplement (doi:10.3390/ijms241210327), 2023-06-19
Supplement: s1 [file s1]

4 Suppl. Table S7\_AllProtNumericFeatures

|                                            | Age           | Age                            | BCVAllogmar   | BCVAllogmar                    | CRT           | CRT                            |
|--------------------------------------------|---------------|--------------------------------|---------------|--------------------------------|---------------|--------------------------------|
| .                                          | Pearson R     | Adj. p-val (Benjamini-H. cor.) | Pearson R     | Adj. p-val (Benjamini-H. cor.) | Pearson R     | Adj. p-val (Benjamini-H. cor.) |
| HBB-HUMAN                                  | -0.0094747507 | 0.9989736                      | -1.132545e-01 | 0.999995089                    | 1.025305e-01  | 0.9996259                      |
| HBA-HUMAN                                  | -0.2524118991 | 0.9989736                      | -8.129292e-02 | 0.999995089                    | -9.518872e-02 | 0.9996259                      |
| HBG1-HUMAN                                 | 0.2226029774  | 0.9989736                      | 1.280711e-01  | 0.999995089                    | 2.625570e-02  | 0.9996259                      |
| ALBU-HUMAN                                 | -0.1507857994 | 0.9989736                      | 2.406242e-02  | 0.999995089                    | 2.325082e-01  | 0.9996259                      |
| HBD-HUMAN                                  | -0.1365847156 | 0.9989736                      | -1.296714e-02 | 0.999995089                    | -8.144655e-02 | 0.9996259                      |
| IGG1-HUMAN                                 | 0.1879431784  | 0.9989736                      | 1.426181e-01  | 0.999995089                    | -1.372544e-01 | 0.9996259                      |
| CAH1-HUMAN                                 | -0.1001769750 | 0.9989736                      | 8.192268e-02  | 0.999995089                    | -5.382155e-02 | 0.9996259                      |
| PRDX2-HUMAN                                | 0.1385683080  | 0.9989736                      | -6.896846e-02 | 0.999995089                    | -3.337711e-02 | 0.9996259                      |
| IGLL1-HUMAN                                | 0.0273209346  | 0.9989736                      | 3.457592e-02  | 0.999995089                    | -8.364049e-02 | 0.9996259                      |
| IGKC-HUMAN                                 | 0.2844264556  | 0.9989736                      | 1.470249e-02  | 0.999995089                    | -1.574230e-01 | 0.9996259                      |
| APOA1-HUMAN                                | 0.0981835589  | 0.9989736                      | -1.322333e-01 | 0.999995089                    | 1.295967e-01  | 0.9996259                      |
| TRFE-HUMAN                                 | -0.0900151846 | 0.9989736                      | 5.276310e-02  | 0.999995089                    | 2.216107e-01  | 0.9996259                      |
| FIBB-HUMAN                                 | 0.0255274006  | 0.9989736                      | -2.973093e-01 | 0.999995089                    | -1.360823e-01 | 0.9996259                      |
| FIBG-HUMAN                                 | 0.0867500087  | 0.9989736                      | -1.651768e-01 | 0.999995089                    | -1.295869e-01 | 0.9996259                      |
| A1AT-HUMAN                                 | 0.1107520220  | 0.9989736                      | -1.526973e-01 | 0.999995089                    | 6.642712e-02  | 0.9996259                      |
| IGL1-HUMAN                                 | 0.0311613581  | 0.9989736                      | 1.526464e-01  | 0.999995089                    | -7.114064e-02 | 0.9996259                      |
| IGHG2-HUMAN                                | -0.0147820690 | 0.9989736                      | -4.510608e-02 | 0.999995089                    | 2.257594e-01  | 0.9996259                      |
| BLVRB-HUMAN                                | 0.0263927877  | 0.9989736                      | -6.901870e-02 | 0.999995089                    | -5.443670e-02 | 0.9996259                      |
| IGK-HUMAN                                  | 0.2626556894  | 0.9989736                      | 1.431021e-01  | 0.999995089                    | -1.524098e-02 | 0.9996259                      |
| CD2AP-HUMAN                                | -0.0027995248 | 0.9989736                      | -1.103446e-01 | 0.999995089                    | -7.228017e-02 | 0.9996259                      |
| CAH2-HUMAN                                 | 0.1063319954  | 0.9989736                      | 3.552441e-02  | 0.999995089                    | -3.948630e-02 | 0.9996259                      |
| FIBA-HUMAN                                 | 0.0862491007  | 0.9989736                      | -1.296168e-01 | 0.999995089                    | -1.662204e-02 | 0.9996259                      |
| B3AT-HUMAN                                 | 0.2291645101  | 0.9989736                      | 8.486740e-02  | 0.999995089                    | -3.269296e-02 | 0.9996259                      |
| IGHA1-HUMAN                                | 0.2980048678  | 0.9989736                      | 2.660745e-01  | 0.999995089                    | -7.741874e-02 | 0.9996259                      |
| RL11-HUMAN                                 | -0.1315238210 | 0.9989736                      | -5.133354e-02 | 0.999995089                    | -7.745822e-02 | 0.9996259                      |
| IGLC7-HUMAN                                | 0.1258883754  | 0.9989736                      | 1.538208e-01  | 0.999995089                    | -1.609290e-01 | 0.9996259                      |
| A2MG-HUMAN                                 | 0.3430264338  | 0.9989736                      | 9.182834e-02  | 0.999995089                    | -1.226215e-01 | 0.9996259                      |
| CATA-HUMAN                                 | -0.0579507898 | 0.9989736                      | 1.226700e-01  | 0.999995089                    | -4.503422e-02 | 0.9996259                      |
| PLF4-HUMAN                                 | -0.1472029138 | 0.9989736                      | -5.119846e-02 | 0.999995089                    | 8.155337e-02  | 0.9996259                      |
| DEF3-HUMAN                                 | 0.2102108627  | 0.9989736                      | -3.321043e-02 | 0.999995089                    | 2.369613e-01  | 0.9996259                      |
| HPT-HUMAN                                  | 0.0082059850  | 0.9989736                      | -4.134052e-02 | 0.999995089                    | -9.548382e-02 | 0.9996259                      |
| IGLC2-HUMAN;IGLC3-HUMAN                    | -0.1366688555 | 0.9989736                      | 2.887275e-02  | 0.999995089                    | -1.736008e-01 | 0.9996259                      |
| APOB-HUMAN                                 | 0.2455709681  | 0.9989736                      | -1.111385e-01 | 0.999995089                    | -2.942724e-02 | 0.9996259                      |
| CO3-HUMAN                                  | -0.0848837616 | 0.9989736                      | 2.833569e-03  | 0.999995089                    | 9.997077e-02  | 0.9996259                      |
| APOA2-HUMAN                                | -0.2143323858 | 0.9989736                      | -1.959415e-01 | 0.999995089                    | 9.977885e-02  | 0.9996259                      |
| A1AG1-HUMAN                                | -0.0287283891 | 0.9989736                      | -4.083543e-02 | 0.999995089                    | -2.375006e-01 | 0.9996259                      |
| ACTB-HUMAN                                 | -0.0222338919 | 0.9989736                      | -4.716090e-02 | 0.999995089                    | 1.078308e-01  | 0.9996259                      |
| PRDX6-HUMAN                                | 0.1890053908  | 0.9989736                      | 8.439363e-03  | 0.999995089                    | 9.018326e-02  | 0.9996259                      |
| MINP1-HUMAN                                | -0.1843097948 | 0.9989736                      | 1.001554e-02  | 0.999995089                    | -2.331534e-01 | 0.9996259                      |
| IGM-HUMAN                                  | -0.1991984642 | 0.9989736                      | -3.967645e-02 | 0.999995089                    | 3.231271e-01  | 0.9996259                      |
| TRY1-HUMAN                                 | -0.0785847729 | 0.9989736                      | 6.724557e-04  | 0.999995089                    | 4.770085e-03  | 0.9996259                      |
| G3P-HUMAN                                  | -0.1639693230 | 0.9989736                      | -1.315195e-01 | 0.999995089                    | -1.017513e-02 | 0.9996259                      |
| S10A6-HUMAN                                | -0.1878397162 | 0.9989736                      | -2.312244e-02 | 0.999995089                    | -1.382038e-01 | 0.9996259                      |
| ACTA-HUMAN;ACTH-HUMAN                      | 0.0034559405  | 0.9989736                      | -5.823069e-02 | 0.999995089                    | 1.365077e-01  | 0.9996259                      |
| FETUA-HUMAN                                | 0.0107638414  | 0.9989736                      | -1.221247e-01 | 0.999995089                    | 2.250591e-02  | 0.9996259                      |
| UBB-HUMAN;UBC-HUMAN;RS27A-HUMAN;RL40-HUMAN | -0.0599673389 | 0.9989736                      | 4.142764e-02  | 0.999995089                    | 3.487862e-02  | 0.9996259                      |
| IGA2-HUMAN                                 | 0.1730712761  | 0.9989736                      | 2.382867e-01  | 0.999995089                    | -2.006378e-02 | 0.9996259                      |
| APOA4-HUMAN                                | 0.0752050119  | 0.9989736                      | -1.377486e-01 | 0.999995089                    | -3.695902e-02 | 0.9996259                      |
| ANK1-HUMAN                                 | -0.1059293762 | 0.9989736                      | -1.797187e-01 | 0.999995089                    | 6.575143e-02  | 0.9996259                      |
| SPTB1-HUMAN                                | 0.1478063487  | 0.9989736                      | -1.122896e-01 | 0.999995089                    | -1.850929e-01 | 0.9996259                      |
| IGHG3-HUMAN                                | 0.0675431104  | 0.9989736                      | -1.173897e-01 | 0.999995089                    | -2.613125e-01 | 0.9996259                      |
| HEMO-HUMAN                                 | -0.0121964911 | 0.9989736                      | -1.754047e-01 | 0.999995089                    | 2.551521e-01  | 0.9996259                      |
| PMGE-HUMAN                                 | -0.0424810452 | 0.9989736                      | 2.670387e-02  | 0.999995089                    | -5.122575e-02 | 0.9996259                      |
| APOC3-HUMAN                                | -0.3282899935 | 0.9989736                      | -1.256748e-01 | 0.999995089                    | 4.571085e-02  | 0.9996259                      |
| EPB42-HUMAN                                | 0.0937247954  | 0.9989736                      | 7.054944e-02  | 0.999995089                    | -1.860398e-02 | 0.9996259                      |
| SBP1-HUMAN                                 | -0.0386962579 | 0.9989736                      | -3.772170e-02 | 0.999995089                    | -2.232810e-01 | 0.9996259                      |
| PFD2-HUMAN                                 | -0.0786903132 | 0.9989736                      | -1.692650e-01 | 0.999995089                    | 3.883127e-02  | 0.9996259                      |
| A1AG2-HUMAN                                | -0.0480204818 | 0.9989736                      | -3.044017e-02 | 0.999995089                    | 4.937619e-03  | 0.9996259                      |
| SPTA1-HUMAN                                | 0.0112087025  | 0.9989736                      | 9.303369e-02  | 0.999995089                    | -1.648866e-02 | 0.9996259                      |
| HEM2-HUMAN                                 | -0.0695119600 | 0.9989736                      | 5.241783e-02  | 0.999995089                    | -1.499500e-01 | 0.9996259                      |
| VTDB-HUMAN                                 | -0.0399855222 | 0.9989736                      | -1.093890e-01 | 0.999995089                    | 8.494070e-02  | 0.9996259                      |
| ITIH4-HUMAN                                | -0.0542390726 | 0.9989736                      | -9.856462e-02 | 0.999995089                    | 1.072151e-02  | 0.9996259                      |
| KV228-HUMAN;KVD28-HUMAN                    | -0.0841110758 | 0.9989736                      | 2.718649e-01  | 0.999995089                    | 2.923523e-01  | 0.9996259                      |
| PRDX1-HUMAN                                | -0.0514880183 | 0.9989736                      | 2.191758e-01  | 0.999995089                    | 4.217880e-02  | 0.9996259                      |
| RARR2-HUMAN                                | -0.0198801228 | 0.9989736                      | -4.579771e-02 | 0.999995089                    | 9.885206e-02  | 0.9996259                      |
| KV315-HUMAN                                | 0.0529940532  | 0.9989736                      | 1.361835e-01  | 0.999995089                    | 3.241009e-02  | 0.9996259                      |
| CO4A-HUMAN                                 | 0.1484128791  | 0.9989736                      | -2.414746e-01 | 0.999995089                    | -2.188607e-01 | 0.9996259                      |
| KVD20-HUMAN                                | 0.1602110015  | 0.9989736                      | 1.118842e-01  | 0.999995089                    | 2.963319e-01  | 0.9996259                      |
| AACT-HUMAN                                 | 0.1020944660  | 0.9989736                      | -1.088984e-01 | 0.999995089                    | 7.812739e-03  | 0.9996259                      |

|                                                |               |           |               |             |               |           |
|------------------------------------------------|---------------|-----------|---------------|-------------|---------------|-----------|
| A1BG-HUMAN                                     | -0.0013684860 | 0.9989736 | -1.621034e-01 | 0.999995089 | -7.051880e-02 | 0.9996259 |
| FINC-HUMAN                                     | -0.1714269974 | 0.9989736 | -2.489976e-01 | 0.999995089 | 1.237711e-01  | 0.9996259 |
| RAN-HUMAN                                      | -0.0637983465 | 0.9989736 | -2.207141e-01 | 0.999995089 | -1.087625e-01 | 0.9996259 |
| KNG1-HUMAN                                     | 0.0825807136  | 0.9989736 | 2.902992e-02  | 0.999995089 | -1.365044e-01 | 0.9996259 |
| C4BPA-HUMAN                                    | -0.0173020103 | 0.9989736 | -9.085677e-02 | 0.999995089 | -1.218628e-01 | 0.9996259 |
| PNPH-HUMAN                                     | -0.0824303263 | 0.9989736 | 1.562048e-01  | 0.999995089 | 5.307557e-04  | 0.9996259 |
| IC1-HUMAN                                      | 0.1165955736  | 0.9989736 | -6.902439e-03 | 0.999995089 | -1.232932e-01 | 0.9996259 |
| VTNC-HUMAN                                     | -0.0189833433 | 0.9989736 | 8.199065e-02  | 0.999995089 | 1.416948e-01  | 0.9996259 |
| GSTO1-HUMAN                                    | -0.1840385038 | 0.9989736 | -4.570042e-02 | 0.999995089 | -1.411473e-01 | 0.9996259 |
| ANT3-HUMAN                                     | 0.0397431130  | 0.9989736 | -9.728562e-02 | 0.999995089 | 3.511257e-03  | 0.9996259 |
| UB2V1-HUMAN                                    | -0.0893921209 | 0.9989736 | 6.678570e-02  | 0.999995089 | -5.405692e-02 | 0.9996259 |
| KV320-HUMAN                                    | -0.0869490119 | 0.9989736 | 7.147099e-02  | 0.999995089 | -5.207086e-02 | 0.9996259 |
| MDHC-HUMAN                                     | 0.1360577475  | 0.9989736 | -3.784280e-02 | 0.999995089 | -2.363459e-01 | 0.9996259 |
| NDKB-HUMAN                                     | -0.1769253156 | 0.9989736 | -1.801290e-02 | 0.999995089 | 1.571046e-01  | 0.9996259 |
| PARK7-HUMAN                                    | -0.1360051227 | 0.9989736 | 3.775277e-02  | 0.999995089 | 5.498032e-02  | 0.9996259 |
| HBG2-HUMAN                                     | -0.2314903534 | 0.9989736 | 1.128268e-01  | 0.999995089 | -3.312514e-02 | 0.9996259 |
| ALDOA-HUMAN                                    | 0.0988163008  | 0.9989736 | 2.144225e-02  | 0.999995089 | -3.520728e-02 | 0.9996259 |
| ITIH2-HUMAN                                    | 0.0176872615  | 0.9989736 | 5.044747e-03  | 0.999995089 | 1.394576e-01  | 0.9996259 |
| FCG3A-HUMAN                                    | -0.0985333692 | 0.9989736 | 2.142370e-01  | 0.999995089 | 8.602853e-02  | 0.9996259 |
| AL1A1-HUMAN                                    | 0.0193320509  | 0.9989736 | 1.080418e-01  | 0.999995089 | -2.202604e-01 | 0.9996259 |
| SYUA-HUMAN                                     | 0.0710385338  | 0.9989736 | -1.203446e-01 | 0.999995089 | 1.166551e-01  | 0.9996259 |
| PLMN-HUMAN                                     | -0.1604107811 | 0.9989736 | 9.625698e-02  | 0.999995089 | 1.157532e-01  | 0.9996259 |
| CSN5-HUMAN                                     | -0.1623792073 | 0.9989736 | 1.182512e-01  | 0.999995089 | 8.328411e-02  | 0.9996259 |
| TERA-HUMAN                                     | -0.2011442121 | 0.9989736 | 1.097759e-01  | 0.999995089 | -4.957896e-02 | 0.9996259 |
| GDIB-HUMAN                                     | -0.1182617991 | 0.9989736 | -1.036763e-01 | 0.999995089 | -4.874906e-02 | 0.9996259 |
| LDHA-HUMAN                                     | -0.0929712061 | 0.9989736 | -4.258636e-03 | 0.999995089 | 8.682824e-02  | 0.9996259 |
| LDHB-HUMAN                                     | 0.1978603913  | 0.9989736 | 4.890326e-02  | 0.999995089 | -2.584479e-01 | 0.9996259 |
| S10A4-HUMAN                                    | 0.0010575295  | 0.9989736 | -4.230648e-02 | 0.999995089 | -3.109163e-01 | 0.9996259 |
| CFAH-HUMAN                                     | -0.0231096255 | 0.9989736 | -2.667530e-02 | 0.999995089 | 2.085269e-02  | 0.9996259 |
| 1433B-HUMAN                                    | 0.2703082754  | 0.9989736 | 1.154455e-01  | 0.999995089 | -1.508731e-01 | 0.9996259 |
| KVD11-HUMAN;KV311-HUMAN                        | 0.0728747399  | 0.9989736 | -3.429461e-02 | 0.999995089 | 1.080595e-01  | 0.9996259 |
| KV401-HUMAN                                    | 0.0426350471  | 0.9989736 | 1.137564e-01  | 0.999995089 | 5.616868e-02  | 0.9996259 |
| CFAB-HUMAN                                     | -0.1362195744 | 0.9989736 | -5.869694e-02 | 0.999995089 | -2.019863e-02 | 0.9996259 |
| PPIA-HUMAN                                     | -0.0188964081 | 0.9989736 | 8.436790e-02  | 0.999995089 | 1.282114e-01  | 0.9996259 |
| C1QC-HUMAN                                     | -0.0422216906 | 0.9989736 | -8.720201e-02 | 0.999995089 | -1.200393e-01 | 0.9996259 |
| KAD1-HUMAN                                     | -0.0646199671 | 0.9989736 | -5.540832e-02 | 0.999995089 | -1.969628e-01 | 0.9996259 |
| C1QB-HUMAN                                     | 0.1455666199  | 0.9989736 | 1.394468e-01  | 0.999995089 | 1.708475e-01  | 0.9996259 |
| LV861-HUMAN                                    | -0.1014964427 | 0.9989736 | -2.042139e-02 | 0.999995089 | -1.042306e-01 | 0.9996259 |
| HV118-HUMAN                                    | 0.0633408843  | 0.9989736 | -1.742586e-01 | 0.999995089 | -4.899490e-02 | 0.9996259 |
| TPIS-HUMAN                                     | -0.0207938003 | 0.9989736 | 7.563657e-02  | 0.999995089 | -8.842008e-02 | 0.9996259 |
| HRG-HUMAN                                      | 0.1675703210  | 0.9989736 | -8.126611e-02 | 0.999995089 | 1.479105e-01  | 0.9996259 |
| DEMA-HUMAN                                     | -0.1528923929 | 0.9989736 | 1.452500e-02  | 0.999995089 | -7.044767e-03 | 0.9996259 |
| DOPD-HUMAN                                     | -0.2152417044 | 0.9989736 | 3.894527e-02  | 0.999995089 | -2.144156e-01 | 0.9996259 |
| PGK1-HUMAN                                     | 0.0296371199  | 0.9989736 | 1.055654e-01  | 0.999995089 | -4.147435e-02 | 0.9996259 |
| HV335-HUMAN                                    | 0.1097486486  | 0.9989736 | 8.208320e-02  | 0.999995089 | 5.253100e-02  | 0.9996259 |
| CERU-HUMAN                                     | 0.1458524654  | 0.9989736 | -2.927111e-02 | 0.999995089 | -1.498133e-02 | 0.9996259 |
| UB2Q2-HUMAN                                    | -0.0962888026 | 0.9989736 | -1.572991e-01 | 0.999995089 | 7.439145e-02  | 0.9996259 |
| H2A1-HUMAN;H2A2C-HUMAN;H2A2A-HUMAN;H2A1C-HUMAN | 0.2114594473  | 0.9989736 | -4.325975e-03 | 0.999995089 | 5.483808e-02  | 0.9996259 |
| APOH-HUMAN                                     | 0.1167699368  | 0.9989736 | 1.195874e-02  | 0.999995089 | -1.147236e-01 | 0.9996259 |
| S10A8-HUMAN                                    | 0.1946190642  | 0.9989736 | 1.949784e-02  | 0.999995089 | 1.414712e-01  | 0.9996259 |
| PRPS1-HUMAN                                    | -0.0978444889 | 0.9989736 | 1.513393e-01  | 0.999995089 | -4.343656e-02 | 0.9996259 |
| 41-HUMAN                                       | 0.1150376464  | 0.9989736 | -7.352677e-02 | 0.999995089 | 4.073608e-02  | 0.9996259 |
| IMB1-HUMAN                                     | 0.1297826930  | 0.9989736 | -2.268611e-02 | 0.999995089 | -2.285635e-02 | 0.9996259 |
| RINI-HUMAN                                     | -0.0691716488 | 0.9989736 | -3.846273e-02 | 0.999995089 | -6.777749e-02 | 0.9996259 |
| 6PGD-HUMAN                                     | -0.0205874112 | 0.9989736 | 1.308134e-01  | 0.999995089 | -1.658346e-02 | 0.9996259 |
| APOE-HUMAN                                     | -0.0351051525 | 0.9989736 | -1.148011e-01 | 0.999995089 | -2.835372e-01 | 0.9996259 |
| AXA2L-HUMAN;ANXA2-HUMAN                        | -0.0422952228 | 0.9989736 | -1.114311e-01 | 0.999995089 | 3.293656e-02  | 0.9996259 |
| BIEA-HUMAN                                     | -0.1110590517 | 0.9989736 | -3.481020e-02 | 0.999995089 | -1.110132e-01 | 0.9996259 |
| MIF-HUMAN                                      | -0.0296550363 | 0.9989736 | -2.339011e-01 | 0.999995089 | 4.916649e-03  | 0.9996259 |
| HPRT-HUMAN                                     | -0.1408074146 | 0.9989736 | -3.374936e-02 | 0.999995089 | -2.750742e-01 | 0.9996259 |
| THRB-HUMAN                                     | -0.1155098154 | 0.9989736 | 1.183372e-02  | 0.999995089 | 1.758664e-01  | 0.9996259 |
| TGM2-HUMAN                                     | 0.0364855810  | 0.9989736 | -1.812876e-01 | 0.999995089 | -1.734031e-01 | 0.9996259 |
| RD23A-HUMAN                                    | -0.0640995543 | 0.9989736 | 7.427906e-03  | 0.999995089 | -4.223559e-02 | 0.9996259 |
| HV373-HUMAN                                    | -0.1372220552 | 0.9989736 | 4.422843e-02  | 0.999995089 | 3.446642e-02  | 0.9996259 |
| PPAC-HUMAN                                     | 0.2479213475  | 0.9989736 | 4.832112e-02  | 0.999995089 | 4.617590e-02  | 0.9996259 |
| AFAM-HUMAN                                     | -0.1322883623 | 0.9989736 | 7.465464e-02  | 0.999995089 | 3.473894e-01  | 0.9996259 |
| TPM4-HUMAN                                     | -0.0837605498 | 0.9989736 | 1.429711e-02  | 0.999995089 | 2.817498e-02  | 0.9996259 |
| KVD24-HUMAN;KV224-HUMAN                        | -0.0318711792 | 0.9989736 | 1.999404e-02  | 0.999995089 | -5.370693e-03 | 0.9996259 |
| UBE2N-HUMAN                                    | -0.1344323369 | 0.9989736 | -7.879542e-02 | 0.999995089 | -8.616327e-02 | 0.9996259 |
| F10A1-HUMAN                                    | 0.0279709901  | 0.9989736 | -5.670236e-02 | 0.999995089 | -1.741697e-01 | 0.9996259 |
| LGUL-HUMAN                                     | -0.4117511181 | 0.9989736 | 7.985251e-02  | 0.999995089 | -4.433465e-02 | 0.9996259 |
| STOM-HUMAN                                     | 0.1989968644  | 0.9989736 | 9.131282e-02  | 0.999995089 | -4.479086e-02 | 0.9996259 |

|                                     |               |           |               |             |               |           |
|-------------------------------------|---------------|-----------|---------------|-------------|---------------|-----------|
| S10A9-HUMAN                         | 0.1786085157  | 0.9989736 | 4.647567e-02  | 0.999995089 | 4.243184e-02  | 0.9996259 |
| CXCL7-HUMAN                         | -0.0885836833 | 0.9989736 | -1.168799e-01 | 0.999995089 | 1.492524e-01  | 0.9996259 |
| KV230-HUMAN                         | -0.1595067489 | 0.9989736 | 4.767374e-02  | 0.999995089 | 4.184703e-02  | 0.9996259 |
| AIDA-HUMAN                          | 0.1989011593  | 0.9989736 | 9.623641e-04  | 0.999995089 | -4.084669e-02 | 0.9996259 |
| LV147-HUMAN                         | -0.1243813191 | 0.9989736 | 5.359273e-03  | 0.999995089 | 9.021883e-04  | 0.9996259 |
| CD5L-HUMAN                          | -0.1411384299 | 0.9989736 | 1.979592e-02  | 0.999995089 | 3.130898e-01  | 0.9996259 |
| GLO2-HUMAN                          | -0.3021274358 | 0.9989736 | -2.684474e-02 | 0.999995089 | 4.208596e-02  | 0.9996259 |
| HBAT-HUMAN                          | -0.2439356470 | 0.9989736 | -3.744704e-02 | 0.999995089 | 2.052404e-01  | 0.9996259 |
| APOC2-HUMAN                         | -0.2482191664 | 0.9989736 | -2.663285e-03 | 0.999995089 | 2.191907e-02  | 0.9996259 |
| COF1-HUMAN                          | 0.0100770287  | 0.9989736 | -1.094364e-01 | 0.999995089 | -5.677435e-02 | 0.9996259 |
| SAA4-HUMAN                          | 0.0909875286  | 0.9989736 | -8.302921e-02 | 0.999995089 | 2.981002e-02  | 0.9996259 |
| GLRX1-HUMAN                         | -0.0786792975 | 0.9989736 | 7.513418e-02  | 0.999995089 | 1.021366e-02  | 0.9996259 |
| TALDO-HUMAN                         | -0.0917404063 | 0.9989736 | 6.247906e-02  | 0.999995089 | -5.993712e-02 | 0.9996259 |
| CAN1-HUMAN                          | -0.1212934576 | 0.9989736 | 6.494025e-02  | 0.999995089 | -1.185815e-01 | 0.9996259 |
| APOM-HUMAN                          | -0.0276815367 | 0.9989736 | -1.345181e-01 | 0.999995089 | 2.500282e-01  | 0.9996259 |
| CAH3-HUMAN                          | 0.0903028735  | 0.9989736 | 8.544432e-02  | 0.999995089 | -6.325933e-02 | 0.9996259 |
| APOD-HUMAN                          | 0.0515065694  | 0.9989736 | -1.522972e-01 | 0.999995089 | 2.635354e-02  | 0.9996259 |
| C1S-HUMAN                           | -0.0001950440 | 0.9989736 | -9.052763e-02 | 0.999995089 | -3.556692e-02 | 0.9996259 |
| RS26-HUMAN;RS26L-HUMAN              | -0.0907947100 | 0.9989736 | 1.156034e-02  | 0.999995089 | 1.052825e-01  | 0.9996259 |
| HV307-HUMAN                         | -0.0883322612 | 0.9989736 | 1.085599e-01  | 0.999995089 | 2.235871e-01  | 0.9996259 |
| GPX1-HUMAN                          | -0.0027756487 | 0.9989736 | -4.741209e-03 | 0.999995089 | -1.540716e-01 | 0.9996259 |
| HV169-HUMAN                         | 0.1252284084  | 0.9989736 | 6.125420e-02  | 0.999995089 | -1.245227e-01 | 0.9996259 |
| KLKB1-HUMAN                         | -0.1712937031 | 0.9989736 | -6.639841e-02 | 0.999995089 | -3.084178e-02 | 0.9996259 |
| ARF3-HUMAN;ARF1-HUMAN               | 0.0335521047  | 0.9989736 | 1.190029e-02  | 0.999995089 | -1.122135e-01 | 0.9996259 |
| HSP7C-HUMAN                         | -0.1500684221 | 0.9989736 | 8.288920e-02  | 0.999995089 | -4.778364e-02 | 0.9996259 |
| HV374-HUMAN                         | -0.0887513535 | 0.9989736 | 1.077873e-01  | 0.999995089 | 3.196998e-01  | 0.9996259 |
| 1433Z-HUMAN                         | -0.0577154639 | 0.9989736 | -4.576466e-02 | 0.999995089 | -1.184867e-01 | 0.9996259 |
| PIMT-HUMAN                          | -0.1853565427 | 0.9989736 | 9.420628e-02  | 0.999995089 | 1.073096e-01  | 0.9996259 |
| ACPH-HUMAN                          | -0.2171947669 | 0.9989736 | -4.620987e-02 | 0.999995089 | -1.931803e-01 | 0.9996259 |
| IGHG4-HUMAN                         | -0.0814774698 | 0.9989736 | 1.834405e-01  | 0.999995089 | 2.390303e-01  | 0.9996259 |
| HV309-HUMAN                         | 0.0482711570  | 0.9989736 | -6.297360e-02 | 0.999995089 | -8.343139e-02 | 0.9996259 |
| NTF2-HUMAN                          | 0.0740491223  | 0.9989736 | -1.351959e-01 | 0.999995089 | -1.219211e-02 | 0.9996259 |
| DDI2-HUMAN                          | -0.1641079112 | 0.9989736 | -1.568782e-01 | 0.999995089 | -9.156537e-02 | 0.9996259 |
| PGM2-HUMAN                          | -0.1277767836 | 0.9989736 | 3.983030e-02  | 0.999995089 | -3.511230e-02 | 0.9996259 |
| UBP5-HUMAN                          | 0.0817027406  | 0.9989736 | 7.882780e-04  | 0.999995089 | -7.577101e-02 | 0.9996259 |
| PSA4-HUMAN                          | -0.2239041605 | 0.9989736 | 2.268987e-01  | 0.999995089 | 6.823594e-03  | 0.9996259 |
| KVD13-HUMAN;KV113-HUMAN             | -0.1121082672 | 0.9989736 | -1.117891e-01 | 0.999995089 | -9.531692e-02 | 0.9996259 |
| EM55-HUMAN                          | 0.1805609095  | 0.9989736 | 1.130493e-01  | 0.999995089 | -8.838476e-02 | 0.9996259 |
| ADDB-HUMAN                          | 0.0441344482  | 0.9989736 | 3.741630e-02  | 0.999995089 | 1.251840e-01  | 0.9996259 |
| GELS-HUMAN                          | 0.1393834665  | 0.9989736 | -2.077051e-01 | 0.999995089 | -2.967697e-02 | 0.9996259 |
| APOC1-HUMAN                         | -0.0023019601 | 0.9989736 | -1.281137e-01 | 0.999995089 | 1.231201e-01  | 0.9996259 |
| LV319-HUMAN                         | 0.1280506687  | 0.9989736 | 9.107876e-02  | 0.999995089 | -2.880230e-01 | 0.9996259 |
| PROS-HUMAN                          | -0.1005552042 | 0.9989736 | -4.431419e-02 | 0.999995089 | 1.172384e-01  | 0.9996259 |
| CFAI-HUMAN                          | 0.0426333218  | 0.9989736 | -6.499877e-02 | 0.999995089 | -1.822232e-02 | 0.9996259 |
| THIO-HUMAN                          | -0.1958148316 | 0.9989736 | -8.930773e-02 | 0.999995089 | -1.039418e-01 | 0.9996259 |
| CCS-HUMAN                           | -0.3471491773 | 0.9989736 | 7.761532e-02  | 0.999995089 | -1.224500e-01 | 0.9996259 |
| ITIH1-HUMAN                         | -0.0298573785 | 0.9989736 | 6.264941e-02  | 0.999995089 | 5.784975e-02  | 0.9996259 |
| NCEH1-HUMAN                         | 0.0647089873  | 0.9989736 | 1.003342e-01  | 0.999995089 | -4.436504e-02 | 0.9996259 |
| KV112-HUMAN;KVD12-HUMAN             | 0.2347703201  | 0.9989736 | -1.352077e-01 | 0.999995089 | -1.632072e-01 | 0.9996259 |
| HV434-HUMAN                         | 0.2730789083  | 0.9989736 | 7.364894e-02  | 0.999995089 | -1.695200e-01 | 0.9996259 |
| PEBP1-HUMAN                         | -0.1893636242 | 0.9989736 | 1.444231e-01  | 0.999995089 | -9.530434e-02 | 0.9996259 |
| TCPQ-HUMAN                          | -0.0010908858 | 0.9989736 | 2.694410e-01  | 0.999995089 | 2.074623e-01  | 0.9996259 |
| CAND1-HUMAN                         | 0.1003567721  | 0.9989736 | 1.555273e-01  | 0.999995089 | -3.039345e-02 | 0.9996259 |
| 1433E-HUMAN                         | 0.0753517868  | 0.9989736 | -5.553479e-02 | 0.999995089 | -1.075901e-01 | 0.9996259 |
| A2AP-HUMAN                          | -0.0660847356 | 0.9989736 | 4.693738e-02  | 0.999995089 | 8.048487e-02  | 0.9996259 |
| SORCN-HUMAN                         | -0.0610441289 | 0.9989736 | -1.774657e-01 | 0.999995089 | -1.350390e-01 | 0.9996259 |
| SAHH-HUMAN                          | -0.0464445084 | 0.9989736 | -3.273703e-02 | 0.999995089 | -4.233963e-02 | 0.9996259 |
| SODC-HUMAN                          | 0.1421611121  | 0.9989736 | 7.143195e-02  | 0.999995089 | -5.736284e-02 | 0.9996259 |
| HARS1-HUMAN                         | -0.0249840462 | 0.9989736 | 2.136649e-01  | 0.999995089 | -9.766080e-02 | 0.9996259 |
| CPNS1-HUMAN                         | -0.1287985467 | 0.9989736 | -3.847889e-02 | 0.999995089 | -8.524133e-02 | 0.9996259 |
| HEP2-HUMAN                          | -0.1223128733 | 0.9989736 | -5.507865e-03 | 0.999995089 | -9.868935e-02 | 0.9996259 |
| TYB4-HUMAN                          | 0.0358609939  | 0.9989736 | -8.063614e-02 | 0.999995089 | 6.597747e-02  | 0.9996259 |
| LUM-HUMAN                           | 0.1073225235  | 0.9989736 | -8.991847e-02 | 0.999995089 | -7.169896e-02 | 0.9996259 |
| CALM1-HUMAN;CALM2-HUMAN;CALM3-HUMAN | -0.0902306307 | 0.9989736 | 1.239313e-01  | 0.999995089 | 5.722621e-02  | 0.9996259 |
| PTPRJ-HUMAN                         | -0.0360921315 | 0.9989736 | 1.540004e-01  | 0.999995089 | 8.691904e-02  | 0.9996259 |
| HEM3-HUMAN                          | -0.2046652391 | 0.9989736 | -9.559893e-02 | 0.999995089 | 1.703461e-01  | 0.9996259 |
| IGHM-HUMAN                          | -0.1646239528 | 0.9989736 | 4.595898e-02  | 0.999995089 | 2.706583e-01  | 0.9996259 |
| ANGT-HUMAN                          | -0.0148588525 | 0.9989736 | -1.402698e-01 | 0.999995089 | -3.904551e-03 | 0.9996259 |
| ICAL-HUMAN                          | -0.1675706038 | 0.9989736 | -2.344154e-02 | 0.999995089 | 3.298423e-02  | 0.9996259 |
| TRFL-HUMAN                          | 0.2100974502  | 0.9989736 | -5.206327e-02 | 0.999995089 | 1.718471e-01  | 0.9996259 |
| FKB1A-HUMAN                         | 0.0421511094  | 0.9989736 | -2.894310e-02 | 0.999995089 | -9.811025e-02 | 0.9996259 |
| PSMF1-HUMAN                         | 0.0139216613  | 0.9989736 | 3.304488e-02  | 0.999995089 | -9.454760e-02 | 0.9996259 |

|                                                 |               |           |               |             |               |           |
|-------------------------------------------------|---------------|-----------|---------------|-------------|---------------|-----------|
| HYAS1-HUMAN                                     | -0.0595473038 | 0.9989736 | 1.522878e-01  | 0.999995089 | 1.665446e-01  | 0.9996259 |
| CO5-HUMAN                                       | 0.1680173093  | 0.9989736 | 1.624493e-02  | 0.999995089 | 5.639741e-02  | 0.9996259 |
| PTPA-HUMAN                                      | -0.1946796792 | 0.9989736 | -3.954482e-02 | 0.999995089 | -1.350885e-01 | 0.9996259 |
| HS71A-HUMAN;HS71B-HUMAN                         | -0.1728178041 | 0.9989736 | 1.573072e-01  | 0.999995089 | -1.937063e-01 | 0.9996259 |
| FHR3-HUMAN                                      | -0.0245678727 | 0.9989736 | -9.747157e-02 | 0.999995089 | -4.721561e-02 | 0.9996259 |
| APOA-HUMAN                                      | -0.0420222828 | 0.9989736 | 5.439553e-02  | 0.999995089 | -2.245863e-02 | 0.9996259 |
| CO4B-HUMAN                                      | 0.0868745324  | 0.9989736 | 5.968546e-02  | 0.999995089 | -1.588600e-01 | 0.9996259 |
| KPYR-HUMAN                                      | 0.2529007310  | 0.9989736 | -1.118951e-01 | 0.999995089 | -8.537062e-02 | 0.9996259 |
| PSME1-HUMAN                                     | -0.1665956740 | 0.9989736 | 1.380054e-01  | 0.999995089 | 1.819052e-03  | 0.9996259 |
| C1QA-HUMAN                                      | -0.0066185562 | 0.9989736 | -7.427744e-02 | 0.999995089 | -1.096605e-01 | 0.9996259 |
| TSP1-HUMAN                                      | 0.0014985494  | 0.9989736 | -1.534033e-01 | 0.999995089 | -6.408056e-02 | 0.9996259 |
| FBX7-HUMAN                                      | 0.0457250351  | 0.9989736 | 1.438374e-01  | 0.999995089 | -3.728350e-03 | 0.9996259 |
| HPTR-HUMAN                                      | 0.1651565191  | 0.9989736 | 5.139339e-02  | 0.999995089 | -9.696921e-02 | 0.9996259 |
| ADDA-HUMAN                                      | -0.0565799782 | 0.9989736 | 8.616422e-02  | 0.999995089 | -6.380468e-02 | 0.9996259 |
| PITH1-HUMAN                                     | 0.0686120068  | 0.9989736 | -2.708902e-02 | 0.999995089 | -1.141602e-01 | 0.9996259 |
| LV144-HUMAN                                     | 0.1647306860  | 0.9989736 | -2.590991e-02 | 0.999995089 | -3.056552e-01 | 0.9996259 |
| TCPG-HUMAN                                      | 0.1210457114  | 0.9989736 | 2.944272e-01  | 0.999995089 | -1.018878e-01 | 0.9996259 |
| STIP1-HUMAN                                     | 0.0194113932  | 0.9989736 | 9.084739e-02  | 0.999995089 | -3.027083e-01 | 0.9996259 |
| DCUP-HUMAN                                      | -0.4406025854 | 0.9989736 | 1.425857e-01  | 0.999995089 | 2.337726e-02  | 0.9996259 |
| AHSP-HUMAN                                      | -0.1591592672 | 0.9989736 | 5.870120e-02  | 0.999995089 | 1.827081e-01  | 0.9996259 |
| PSA1-HUMAN                                      | -0.2579680222 | 0.9989736 | 5.404502e-02  | 0.999995089 | 5.147756e-03  | 0.9996259 |
| FHR1-HUMAN                                      | 0.0239135922  | 0.9989736 | -5.903164e-02 | 0.999995089 | -1.491798e-02 | 0.9996259 |
| ENOA-HUMAN                                      | -0.0751147982 | 0.9989736 | 3.405949e-02  | 0.999995089 | 4.878411e-02  | 0.9996259 |
| CLIC1-HUMAN                                     | -0.0966825326 | 0.9989736 | 3.949712e-02  | 0.999995089 | -1.437940e-01 | 0.9996259 |
| IGJ-HUMAN                                       | 0.1498649693  | 0.9989736 | 1.605269e-01  | 0.999995089 | 1.541806e-01  | 0.9996259 |
| BMP1-HUMAN;TLL2-HUMAN                           | 0.1852597667  | 0.9989736 | -3.243174e-02 | 0.999995089 | 5.765826e-02  | 0.9996259 |
| APOL1-HUMAN                                     | -0.1698062215 | 0.9989736 | -1.433744e-01 | 0.999995089 | 3.656175e-02  | 0.9996259 |
| QCR7-HUMAN                                      | 0.1341500874  | 0.9989736 | -9.208595e-02 | 0.999995089 | -6.531799e-02 | 0.9996259 |
| TCPZ-HUMAN                                      | 0.0500829918  | 0.9989736 | 1.630485e-01  | 0.999995089 | 3.120621e-02  | 0.9996259 |
| UBP14-HUMAN                                     | -0.2178223483 | 0.9989736 | 2.220972e-02  | 0.999995089 | -1.414079e-01 | 0.9996259 |
| FCL-HUMAN                                       | -0.0838674072 | 0.9989736 | 1.408645e-01  | 0.999995089 | -4.667219e-02 | 0.9996259 |
| 2AAA-HUMAN                                      | 0.0109417813  | 0.9989736 | 1.442863e-01  | 0.999995089 | -5.008865e-02 | 0.9996259 |
| CLUS-HUMAN                                      | -0.0660116407 | 0.9989736 | -1.460572e-01 | 0.999995089 | 9.967900e-02  | 0.9996259 |
| GSHR-HUMAN                                      | -0.1159156119 | 0.9989736 | 5.006272e-02  | 0.999995089 | -2.056381e-01 | 0.9996259 |
| IF5A1-HUMAN                                     | 0.2184808482  | 0.9989736 | 2.530275e-02  | 0.999995089 | -1.355570e-01 | 0.9996259 |
| TCPE-HUMAN                                      | 0.0304612425  | 0.9989736 | 1.073435e-01  | 0.999995089 | 8.033348e-02  | 0.9996259 |
| FLNA-HUMAN                                      | 0.0153020399  | 0.9989736 | -4.933535e-02 | 0.999995089 | 6.306951e-02  | 0.9996259 |
| HEBP1-HUMAN                                     | -0.3491159815 | 0.9989736 | -2.392880e-02 | 0.999995089 | 7.051499e-02  | 0.9996259 |
| PSA7-HUMAN                                      | -0.1492267699 | 0.9989736 | 2.158705e-03  | 0.999995089 | -4.740648e-03 | 0.9996259 |
| PA1B3-HUMAN                                     | 0.0956663960  | 0.9989736 | -4.983955e-02 | 0.999995089 | -2.487889e-01 | 0.9996259 |
| TCPB-HUMAN                                      | 0.0141574509  | 0.9989736 | 1.909822e-01  | 0.999995089 | 1.773130e-01  | 0.9996259 |
| SKP1-HUMAN                                      | -0.0285711363 | 0.9989736 | 9.977982e-02  | 0.999995089 | -2.664629e-01 | 0.9996259 |
| LV39-HUMAN                                      | -0.1394855664 | 0.9989736 | 1.187238e-01  | 0.999995089 | -2.845807e-01 | 0.9996259 |
| NDKA-HUMAN                                      | 0.0154136509  | 0.9989736 | 1.208887e-01  | 0.999995089 | 2.936127e-03  | 0.9996259 |
| TCPH-HUMAN                                      | 0.0377761931  | 0.9989736 | 1.913275e-01  | 0.999995089 | 1.108814e-01  | 0.9996259 |
| TXNL1-HUMAN                                     | -0.1800972819 | 0.9989736 | 4.812635e-02  | 0.999995089 | 2.316968e-02  | 0.9996259 |
| GSTP1-HUMAN                                     | -0.0836622263 | 0.9989736 | 7.760860e-02  | 0.999995089 | -2.027205e-01 | 0.9996259 |
| HS90B-HUMAN                                     | -0.0226778732 | 0.9989736 | -1.924778e-03 | 0.999995089 | -3.623881e-02 | 0.9996259 |
| HV5X1-HUMAN                                     | 0.0042935609  | 0.9989736 | 7.644162e-02  | 0.999995089 | 5.618437e-02  | 0.9996259 |
| RPIA-HUMAN                                      | -0.1031132726 | 0.9989736 | 2.499407e-02  | 0.999995089 | 2.749102e-02  | 0.9996259 |
| RET4-HUMAN                                      | 0.0154412821  | 0.9989736 | 3.683176e-02  | 0.999995089 | 3.802006e-03  | 0.9996259 |
| BOLA2-HUMAN                                     | -0.2120560765 | 0.9989736 | -1.231432e-01 | 0.999995089 | -1.104998e-01 | 0.9996259 |
| H2B1K-HUMAN;H2B1J-HUMAN;H2B1O-HUMAN;H2B1B-HUMAN | 0.1717973753  | 0.9989736 | -7.674870e-02 | 0.999995089 | 5.424166e-02  | 0.9996259 |
| FA12-HUMAN                                      | -0.0730918027 | 0.9989736 | -1.411414e-01 | 0.999995089 | 7.935112e-02  | 0.9996259 |
| IF4A1-HUMAN                                     | 0.0253682941  | 0.9989736 | 2.657734e-02  | 0.999995089 | 1.801032e-01  | 0.9996259 |
| SHPS1-HUMAN;SIRBL-HUMAN;SIRPG-HUMAN             | 0.1768558785  | 0.9989736 | -8.760667e-02 | 0.999995089 | 1.759633e-01  | 0.9996259 |
| UBA1-HUMAN                                      | -0.0768419117 | 0.9989736 | 1.834359e-02  | 0.999995089 | -1.149577e-01 | 0.9996259 |
| SH3L3-HUMAN                                     | -0.0301509019 | 0.9989736 | -4.979790e-02 | 0.999995089 | 1.173137e-01  | 0.9996259 |
| PNCB-HUMAN                                      | -0.0379387035 | 0.9989736 | -6.824006e-02 | 0.999995089 | 5.741040e-02  | 0.9996259 |
| GTR1-HUMAN                                      | 0.2611084169  | 0.9989736 | 1.071427e-01  | 0.999995089 | -3.257682e-02 | 0.9996259 |
| PSB2-HUMAN                                      | 0.1890062208  | 0.9989736 | 1.277673e-01  | 0.999995089 | -2.293854e-02 | 0.9996259 |
| RAC1-HUMAN                                      | 0.2129810905  | 0.9989736 | 1.024761e-01  | 0.999995089 | -2.387499e-02 | 0.9996259 |
| CO7-HUMAN                                       | 0.2916433587  | 0.9989736 | 4.411081e-02  | 0.999995089 | -1.433282e-01 | 0.9996259 |
| PUR6-HUMAN                                      | -0.1514432726 | 0.9989736 | -4.532981e-02 | 0.999995089 | 1.474521e-01  | 0.9996259 |
| ACLY-HUMAN                                      | -0.1471229664 | 0.9989736 | 1.361118e-01  | 0.999995089 | -1.131905e-01 | 0.9996259 |
| WDR1-HUMAN                                      | -0.0970277279 | 0.9989736 | -2.590333e-02 | 0.999995089 | 2.780154e-02  | 0.9996259 |
| HS90A-HUMAN                                     | -0.1059899525 | 0.9989736 | 3.654323e-02  | 0.999995089 | 6.090765e-02  | 0.9996259 |
| CO9-HUMAN                                       | -0.0259378106 | 0.9989736 | 3.555754e-03  | 0.999995089 | 4.864641e-02  | 0.9996259 |
| LV310-HUMAN                                     | -0.0204625592 | 0.9989736 | 6.146126e-02  | 0.999995089 | -5.860490e-02 | 0.9996259 |
| TPM3-HUMAN                                      | -0.0349588344 | 0.9989736 | 1.312223e-02  | 0.999995089 | 3.450717e-02  | 0.9996259 |
| PSA5-HUMAN                                      | -0.1548823462 | 0.9989736 | 1.289584e-01  | 0.999995089 | 3.399919e-02  | 0.9996259 |
| RPE-HUMAN                                       | 0.1284787600  | 0.9989736 | 4.788415e-02  | 0.999995089 | 2.290310e-01  | 0.9996259 |

|                                     |               |           |               |             |               |           |
|-------------------------------------|---------------|-----------|---------------|-------------|---------------|-----------|
| PLSL-HUMAN                          | 0.2374966254  | 0.9989736 | 1.018736e-01  | 0.999995089 | -1.536361e-01 | 0.9996259 |
| DAZP1-HUMAN                         | 0.0876916997  | 0.9989736 | -4.364465e-02 | 0.999995089 | 2.676626e-01  | 0.9996259 |
| THTM-HUMAN                          | -0.0526503604 | 0.9989736 | 1.004927e-01  | 0.999995089 | -2.923985e-02 | 0.9996259 |
| OLA1-HUMAN                          | -0.0076941876 | 0.9989736 | 5.060033e-03  | 0.999995089 | 1.156481e-02  | 0.9996259 |
| TAGL2-HUMAN                         | -0.0030562160 | 0.9989736 | 4.929939e-03  | 0.999995089 | 4.899240e-03  | 0.9996259 |
| TBCA-HUMAN                          | -0.0330529862 | 0.9989736 | 6.285821e-02  | 0.999995089 | 6.193704e-02  | 0.9996259 |
| PSB1-HUMAN                          | -0.0682534625 | 0.9989736 | 2.553937e-01  | 0.999995089 | -1.115853e-01 | 0.9996259 |
| CO2-HUMAN                           | -0.1558513964 | 0.9989736 | 4.066860e-02  | 0.999995089 | -5.455127e-02 | 0.9996259 |
| SUMO3-HUMAN;SUMO2-HUMAN;SUMO4-HUMAN | 0.1121862939  | 0.9989736 | -1.348740e-01 | 0.999995089 | 1.387942e-01  | 0.9996259 |
| HV551-HUMAN                         | 0.0822270949  | 0.9989736 | 7.289986e-02  | 0.999995089 | 2.191466e-02  | 0.9996259 |
| PSMD9-HUMAN                         | -0.0031991410 | 0.9989736 | -1.725175e-02 | 0.999995089 | -8.508293e-02 | 0.9996259 |
| PGRP2-HUMAN                         | -0.0270446239 | 0.9989736 | -1.329931e-01 | 0.999995089 | 7.565741e-02  | 0.9996259 |
| AMBP-HUMAN                          | 0.0558803568  | 0.9989736 | 3.029310e-02  | 0.999995089 | -1.827525e-01 | 0.9996259 |
| ESTD-HUMAN                          | 0.1493938465  | 0.9989736 | 3.524836e-02  | 0.999995089 | -1.276690e-01 | 0.9996259 |
| TCPD-HUMAN                          | 0.1975523378  | 0.9989736 | 2.495124e-01  | 0.999995089 | -1.971501e-02 | 0.9996259 |
| ELNE-HUMAN                          | 0.2453612385  | 0.9989736 | -2.800889e-03 | 0.999995089 | 9.315044e-02  | 0.9996259 |
| NSF1C-HUMAN                         | -0.0775602284 | 0.9989736 | 1.597683e-01  | 0.999995089 | -2.881049e-02 | 0.9996259 |
| TTHY-HUMAN                          | -0.0240581133 | 0.9989736 | 7.609069e-02  | 0.999995089 | 3.287758e-01  | 0.9996259 |
| PUR9-HUMAN                          | 0.0655478325  | 0.9989736 | 2.100704e-02  | 0.999995089 | -2.732924e-01 | 0.9996259 |
| GLOD4-HUMAN                         | -0.1830138760 | 0.9989736 | -1.829152e-01 | 0.999995089 | 4.086946e-03  | 0.9996259 |
| AL1L1-HUMAN                         | -0.1122633552 | 0.9989736 | -1.482203e-01 | 0.999995089 | -1.544005e-01 | 0.9996259 |
| IGD-HUMAN                           | 0.1337661602  | 0.9989736 | 1.159477e-01  | 0.999995089 | 1.848567e-01  | 0.9996259 |
| TKT-HUMAN                           | 0.0056018992  | 0.9989736 | -1.434915e-02 | 0.999995089 | 2.557621e-01  | 0.9996259 |
| TLN1-HUMAN                          | 0.0276651856  | 0.9989736 | -5.383856e-02 | 0.999995089 | -3.711469e-02 | 0.9996259 |
| CYTB-HUMAN                          | -0.1417040460 | 0.9989736 | -2.314802e-01 | 0.999995089 | -1.147205e-01 | 0.9996259 |
| LIMS1-HUMAN                         | -0.0865465755 | 0.9989736 | 7.571790e-03  | 0.999995089 | 8.524864e-02  | 0.9996259 |
| ENOG-HUMAN                          | -0.1181730116 | 0.9989736 | 1.810906e-01  | 0.999995089 | 1.640604e-01  | 0.9996259 |
| PRTN3-HUMAN                         | 0.2838633052  | 0.9989736 | 6.614653e-02  | 0.999995089 | 1.283401e-02  | 0.9996259 |
| A2GL-HUMAN                          | 0.1883028974  | 0.9989736 | -2.180438e-01 | 0.999995089 | -1.340850e-01 | 0.9996259 |
| AATC-HUMAN                          | -0.1242866969 | 0.9989736 | 2.985420e-02  | 0.999995089 | 9.113583e-02  | 0.9996259 |
| GSH1-HUMAN                          | 0.1621228793  | 0.9989736 | 2.965137e-02  | 0.999995089 | 5.342014e-02  | 0.9996259 |
| HBE-HUMAN                           | -0.0286127661 | 0.9989736 | 3.211235e-02  | 0.999995089 | -3.021109e-01 | 0.9996259 |
| LV325-HUMAN                         | 0.0286156940  | 0.9989736 | -8.307928e-02 | 0.999995089 | 5.879386e-02  | 0.9996259 |
| HINT1-HUMAN                         | -0.1726047512 | 0.9989736 | 1.530233e-02  | 0.999995089 | 9.470141e-02  | 0.9996259 |
| KVD15-HUMAN                         | 0.2409730643  | 0.9989736 | -3.012501e-01 | 0.999995089 | -9.169863e-03 | 0.9996259 |
| CO6-HUMAN                           | 0.0835224329  | 0.9989736 | -9.477601e-02 | 0.999995089 | -1.142768e-01 | 0.9996259 |
| SH3L1-HUMAN                         | 0.0288785078  | 0.9989736 | 7.096783e-02  | 0.999995089 | 2.025547e-01  | 0.9996259 |
| HV330-HUMAN;HVC05-HUMAN             | -0.0160410976 | 0.9989736 | 3.173421e-02  | 0.999995089 | -6.543230e-03 | 0.9996259 |
| CO8A-HUMAN                          | 0.0480315539  | 0.9989736 | 2.703132e-03  | 0.999995089 | -2.787335e-02 | 0.9996259 |
| URP2-HUMAN                          | -0.0042720386 | 0.9989736 | 5.534958e-02  | 0.999995089 | -2.997527e-01 | 0.9996259 |
| HV601-HUMAN                         | -0.0153490271 | 0.9989736 | 8.195907e-02  | 0.999995089 | -5.275768e-02 | 0.9996259 |
| UBAC1-HUMAN                         | 0.0953119836  | 0.9989736 | 5.045459e-02  | 0.999995089 | 8.181486e-02  | 0.9996259 |
| LV151-HUMAN                         | -0.0944819260 | 0.9989736 | 2.653462e-02  | 0.999995089 | -1.443390e-01 | 0.9996259 |
| HEM4-HUMAN                          | 0.2257062837  | 0.9989736 | -6.339408e-02 | 0.999995089 | 1.206252e-01  | 0.9996259 |
| PSB4-HUMAN                          | -0.1408310069 | 0.9989736 | 2.066947e-01  | 0.999995089 | -8.437583e-02 | 0.9996259 |
| TEBP-HUMAN                          | 0.0719384564  | 0.9989736 | -7.408473e-02 | 0.999995089 | 1.297008e-01  | 0.9996259 |
| PRS4-HUMAN                          | 0.0822010479  | 0.9989736 | 1.519789e-01  | 0.999995089 | -6.510415e-02 | 0.9996259 |
| ZA2G-HUMAN                          | -0.0277943086 | 0.9989736 | -8.497793e-03 | 0.999995089 | -1.048541e-01 | 0.9996259 |
| HV70D-HUMAN                         | -0.0626627437 | 0.9989736 | 5.705999e-02  | 0.999995089 | 6.726064e-03  | 0.9996259 |
| MOES-HUMAN                          | 0.1470644577  | 0.9989736 | -1.286042e-02 | 0.999995089 | -6.877914e-02 | 0.9996259 |
| APMAP-HUMAN                         | 0.1853609697  | 0.9989736 | -6.844881e-02 | 0.999995089 | 8.796264e-02  | 0.9996259 |
| SNAA-HUMAN                          | -0.1040676726 | 0.9989736 | 1.883160e-01  | 0.999995089 | 2.837233e-01  | 0.9996259 |
| FLOT1-HUMAN                         | 0.2607427078  | 0.9989736 | 1.159596e-01  | 0.999995089 | -1.920814e-01 | 0.9996259 |
| PSA6-HUMAN                          | -0.1396074413 | 0.9989736 | 1.082544e-01  | 0.999995089 | 3.407194e-02  | 0.9996259 |
| CUTA-HUMAN                          | 0.1175270677  | 0.9989736 | -1.283247e-02 | 0.999995089 | -3.977099e-01 | 0.9996259 |
| PSA3-HUMAN                          | -0.0085802816 | 0.9989736 | 1.521598e-01  | 0.999995089 | 5.968732e-02  | 0.9996259 |
| UB2D3-HUMAN;UB2D2-HUMAN             | -0.0190268938 | 0.9989736 | 1.117787e-01  | 0.999995089 | -2.305305e-02 | 0.9996259 |
| ANM5-HUMAN                          | 0.1606777339  | 0.9989736 | 1.532580e-01  | 0.999995089 | 9.774918e-02  | 0.9996259 |
| LV743-HUMAN                         | -0.1640623898 | 0.9989736 | 3.899878e-02  | 0.999995089 | 1.020829e-01  | 0.9996259 |
| ITA2B-HUMAN                         | 0.0055504763  | 0.9989736 | -2.612769e-02 | 0.999995089 | -4.600325e-02 | 0.9996259 |
| SEPP1-HUMAN                         | -0.0031004055 | 0.9989736 | -2.685898e-02 | 0.999995089 | 7.463677e-02  | 0.9996259 |
| CATG-HUMAN                          | 0.3272526903  | 0.9989736 | 7.878421e-03  | 0.999995089 | 1.087451e-01  | 0.9996259 |
| UB2L3-HUMAN                         | 0.0652878527  | 0.9989736 | 1.392779e-01  | 0.999995089 | -1.141793e-01 | 0.9996259 |
| LKHA4-HUMAN                         | -0.0828741760 | 0.9989736 | -1.175587e-02 | 0.999995089 | -2.329460e-01 | 0.9996259 |
| CO8G-HUMAN                          | -0.0712050196 | 0.9989736 | -3.990610e-02 | 0.999995089 | 1.204814e-02  | 0.9996259 |
| LXN-HUMAN                           | 0.0237883953  | 0.9989736 | -1.303919e-01 | 0.999995089 | -6.709243e-02 | 0.9996259 |
| H4-HUMAN                            | 0.2330914978  | 0.9989736 | 7.173199e-02  | 0.999995089 | 4.356304e-02  | 0.9996259 |
| TCPA-HUMAN                          | 0.1881634990  | 0.9989736 | 2.149525e-01  | 0.999995089 | 1.061002e-01  | 0.9996259 |
| PERM-HUMAN                          | 0.3014309670  | 0.9989736 | -2.531049e-02 | 0.999995089 | 7.272681e-02  | 0.9996259 |
| DPP3-HUMAN                          | -0.1024455255 | 0.9989736 | 1.002003e-01  | 0.999995089 | -4.832814e-02 | 0.9996259 |
| IDHC-HUMAN                          | -0.0336207906 | 0.9989736 | -1.167458e-01 | 0.999995089 | 4.785929e-02  | 0.9996259 |
| MCTS1-HUMAN                         | 0.1786710958  | 0.9989736 | 3.777740e-02  | 0.999995089 | -6.416742e-02 | 0.9996259 |



|                                |               |           |               |             |               |           |
|--------------------------------|---------------|-----------|---------------|-------------|---------------|-----------|
| RAP1A-HUMAN                    | 0.1564265322  | 0.9989736 | 4.331219e-02  | 0.999995089 | -8.603267e-02 | 0.9996259 |
| HV432-HUMAN                    | -0.1200000429 | 0.9989736 | 5.373199e-02  | 0.999995089 | -1.482644e-01 | 0.9996259 |
| CHSP1-HUMAN                    | 0.0268766231  | 0.9989736 | 1.451840e-01  | 0.999995089 | -6.877311e-03 | 0.9996259 |
| HBM-HUMAN                      | -0.1842163978 | 0.9989736 | 1.442428e-01  | 0.999995089 | -1.037654e-01 | 0.9996259 |
| K2C6A-HUMAN                    | 0.2067602024  | 0.9989736 | -7.376095e-02 | 0.999995089 | 2.022118e-02  | 0.9996259 |
| CAZA1-HUMAN                    | 0.0279468101  | 0.9989736 | 3.728372e-02  | 0.999995089 | 1.205488e-01  | 0.9996259 |
| ANXA7-HUMAN                    | 0.0373693207  | 0.9989736 | 1.110783e-01  | 0.999995089 | 2.048690e-01  | 0.9996259 |
| HV338-HUMAN                    | -0.0289594373 | 0.9989736 | 6.661655e-02  | 0.999995089 | 2.494338e-01  | 0.9996259 |
| G6PD-HUMAN                     | -0.0547485879 | 0.9989736 | 3.247562e-01  | 0.999995089 | 7.015683e-02  | 0.9996259 |
| G6PI-HUMAN                     | 0.0830780817  | 0.9989736 | -1.427241e-01 | 0.999995089 | -1.861913e-01 | 0.9996259 |
| OTU1-HUMAN                     | -0.3280873285 | 0.9989736 | 3.587377e-02  | 0.999995089 | 1.055274e-01  | 0.9996259 |
| DNP1-HUMAN                     | -0.1111879959 | 0.9989736 | -9.739214e-02 | 0.999995089 | 6.378859e-02  | 0.9996259 |
| OXR1-HUMAN                     | 0.0577304257  | 0.9989736 | 1.490898e-01  | 0.999995089 | -1.140866e-03 | 0.9996259 |
| PSME2-HUMAN                    | -0.2180056213 | 0.9989736 | -9.716729e-02 | 0.999995089 | -1.013453e-01 | 0.9996259 |
| KV139-HUMAN;KVD39-HUMAN        | 0.1489879978  | 0.9989736 | 1.321980e-02  | 0.999995089 | -5.353267e-02 | 0.9996259 |
| RHOA-HUMAN                     | 0.2018944876  | 0.9989736 | 6.486694e-02  | 0.999995089 | -3.143817e-02 | 0.9996259 |
| MYL6-HUMAN                     | 0.0589996607  | 0.9989736 | -6.000381e-02 | 0.999995089 | 8.277452e-02  | 0.9996259 |
| CPN2-HUMAN                     | -0.1287282705 | 0.9989736 | -2.114099e-01 | 0.999995089 | -1.260707e-02 | 0.9996259 |
| PSB6-HUMAN                     | -0.1582330682 | 0.9989736 | 5.445963e-02  | 0.999995089 | -2.467312e-03 | 0.9996259 |
| GSHB-HUMAN                     | -0.2196614829 | 0.9989736 | -1.721591e-01 | 0.999995089 | -4.565092e-02 | 0.9996259 |
| FAAA-HUMAN                     | 0.0056756482  | 0.9989736 | -2.416070e-01 | 0.999995089 | -3.960250e-01 | 0.9996259 |
| UBE2K-HUMAN                    | -0.0762476602 | 0.9989736 | -8.340797e-02 | 0.999995089 | 1.117722e-01  | 0.9996259 |
| MYH9-HUMAN                     | -0.1052756562 | 0.9989736 | 4.377510e-02  | 0.999995089 | 1.334360e-01  | 0.9996259 |
| PI42A-HUMAN                    | 0.0588134813  | 0.9989736 | 5.032248e-02  | 0.999995089 | 3.840171e-03  | 0.9996259 |
| C1RL-HUMAN                     | -0.0283618607 | 0.9989736 | -1.529498e-01 | 0.999995089 | -3.167327e-03 | 0.9996259 |
| RANG-HUMAN                     | -0.1641254278 | 0.9989736 | 1.629525e-01  | 0.999995089 | -5.386674e-02 | 0.9996259 |
| THIC-HUMAN                     | -0.0837303268 | 0.9989736 | -7.430724e-02 | 0.999995089 | -4.140389e-02 | 0.9996259 |
| DCXR-HUMAN                     | -0.2117723814 | 0.9989736 | 8.761485e-02  | 0.999995089 | 1.737370e-01  | 0.9996259 |
| PA1B2-HUMAN                    | 0.0250425636  | 0.9989736 | 4.144032e-02  | 0.999995089 | -1.893544e-01 | 0.9996259 |
| KPYM-HUMAN                     | 0.0951904457  | 0.9989736 | -4.556500e-02 | 0.999995089 | 1.080784e-01  | 0.9996259 |
| HABP2-HUMAN                    | -0.0575862039 | 0.9989736 | -2.674184e-02 | 0.999995089 | 1.095082e-01  | 0.9996259 |
| UBE2O-HUMAN                    | -0.3101326851 | 0.9989736 | 3.674385e-02  | 0.999995089 | 2.022050e-03  | 0.9996259 |
| VINC-HUMAN                     | -0.0055603241 | 0.9989736 | -1.238145e-01 | 0.999995089 | 1.842903e-02  | 0.9996259 |
| PP2AA-HUMAN                    | 0.1054903022  | 0.9989736 | 2.024372e-01  | 0.999995089 | -2.517171e-01 | 0.9996259 |
| ALDOC-HUMAN                    | -0.0542391533 | 0.9989736 | -1.318844e-02 | 0.999995089 | -1.750619e-01 | 0.9996259 |
| PRPS2-HUMAN                    | 0.2288625265  | 0.9989736 | -9.620632e-02 | 0.999995089 | 1.882228e-01  | 0.9996259 |
| PON1-HUMAN                     | -0.1370465736 | 0.9989736 | 6.892441e-03  | 0.999995089 | -1.394635e-01 | 0.9996259 |
| HGFL-HUMAN                     | 0.1686344217  | 0.9989736 | 6.420036e-02  | 0.999995089 | 1.556248e-01  | 0.9996259 |
| GPX3-HUMAN                     | -0.0346036459 | 0.9989736 | 5.616494e-02  | 0.999995089 | 1.651511e-01  | 0.9996259 |
| RLA2-HUMAN                     | 0.2164174085  | 0.9989736 | 4.736243e-02  | 0.999995089 | 6.479790e-02  | 0.9996259 |
| PSB5-HUMAN                     | 0.0382345636  | 0.9989736 | 1.997962e-01  | 0.999995089 | -3.222410e-02 | 0.9996259 |
| H14-HUMAN                      | 0.1066304478  | 0.9989736 | -1.508445e-01 | 0.999995089 | 1.016932e-01  | 0.9996259 |
| CO8B-HUMAN                     | 0.0536380630  | 0.9989736 | 8.071922e-02  | 0.999995089 | 7.403919e-02  | 0.9996259 |
| 6PGL-HUMAN                     | 0.0022212232  | 0.9989736 | -6.664369e-02 | 0.999995089 | -6.304315e-02 | 0.9996259 |
| CBPB2-HUMAN                    | 0.0496393620  | 0.9989736 | -4.660887e-02 | 0.999995089 | -4.978617e-02 | 0.9996259 |
| HV64D-HUMAN                    | 0.1561213750  | 0.9989736 | 1.327730e-02  | 0.999995089 | 2.700555e-02  | 0.9996259 |
| TETN-HUMAN                     | 0.0066098497  | 0.9989736 | -1.620075e-01 | 0.999995089 | -8.278336e-02 | 0.9996259 |
| GLPC-HUMAN                     | 0.2293134264  | 0.9989736 | 2.510598e-02  | 0.999995089 | -6.106291e-02 | 0.9996259 |
| PEDF-HUMAN                     | -0.0880256793 | 0.9989736 | 3.348310e-02  | 0.999995089 | -1.243160e-01 | 0.9996259 |
| H31-HUMAN;H31T-HUMAN;H32-HUMAN | 0.2258643160  | 0.9989736 | 5.502747e-02  | 0.999995089 | 6.539575e-02  | 0.9996259 |
| UBP15-HUMAN                    | -0.2800189032 | 0.9989736 | 2.003430e-02  | 0.999995089 | 2.521719e-02  | 0.9996259 |
| GSH0-HUMAN                     | -0.0739046023 | 0.9989736 | -5.583440e-02 | 0.999995089 | 3.132129e-02  | 0.9996259 |
| PRS7-HUMAN                     | 0.0026690152  | 0.9989736 | 1.634561e-01  | 0.999995089 | -2.799488e-01 | 0.9996259 |
| PGBM-HUMAN                     | -0.0726366009 | 0.9989736 | 2.796281e-01  | 0.999995089 | -6.096231e-02 | 0.9996259 |
| PGAM1-HUMAN                    | -0.1056035890 | 0.9989736 | 6.775007e-02  | 0.999995089 | -7.681297e-02 | 0.9996259 |
| CSN4-HUMAN                     | -0.2032293208 | 0.9989736 | 2.068515e-01  | 0.999995089 | 1.637979e-01  | 0.9996259 |
| PSB7-HUMAN                     | -0.1554084629 | 0.9989736 | 1.639869e-01  | 0.999995089 | 1.065752e-01  | 0.9996259 |
| NP1L4-HUMAN                    | 0.2458340556  | 0.9989736 | 8.247800e-02  | 0.999995089 | 2.580735e-02  | 0.9996259 |
| KV108-HUMAN                    | 0.1612732142  | 0.9989736 | 1.779759e-01  | 0.999995089 | 8.351769e-03  | 0.9996259 |
| FN3K-HUMAN                     | 0.1422217132  | 0.9989736 | -1.370182e-01 | 0.999995089 | -1.745525e-01 | 0.9996259 |
| HV313-HUMAN                    | -0.0898787171 | 0.9989736 | 1.259705e-01  | 0.999995089 | -8.405117e-02 | 0.9996259 |
| ACTN1-HUMAN                    | 0.0757765915  | 0.9989736 | -7.514820e-04 | 0.999995089 | 3.314880e-02  | 0.9996259 |
| HV404-HUMAN                    | 0.1818048414  | 0.9989736 | 1.053904e-01  | 0.999995089 | 1.285459e-01  | 0.9996259 |
| RAB1B-HUMAN                    | 0.0596881304  | 0.9989736 | 1.661418e-01  | 0.999995089 | 1.071066e-02  | 0.9996259 |
| ANXA3-HUMAN                    | -0.1890111542 | 0.9989736 | -2.062885e-02 | 0.999995089 | 3.836690e-02  | 0.9996259 |
| AP2S1-HUMAN                    | 0.0246063926  | 0.9989736 | -2.009103e-01 | 0.999995089 | 1.004785e-01  | 0.9996259 |
| LYSC-HUMAN                     | 0.1804679579  | 0.9989736 | -6.989333e-02 | 0.999995089 | -3.466828e-02 | 0.9996259 |
| CAP1-HUMAN                     | 0.0801506297  | 0.9989736 | -5.457438e-02 | 0.999995089 | -1.305854e-01 | 0.9996259 |
| XPO7-HUMAN                     | -0.0113475140 | 0.9989736 | -9.899885e-02 | 0.999995089 | 1.117133e-01  | 0.9996259 |
| GMPR1-HUMAN                    | -0.2512790154 | 0.9989736 | -1.142972e-01 | 0.999995089 | -9.498699e-02 | 0.9996259 |
| THBG-HUMAN                     | 0.0320073299  | 0.9989736 | -1.496759e-01 | 0.999995089 | -6.294836e-02 | 0.9996259 |
| NLTP-HUMAN                     | 0.0648596227  | 0.9989736 | 1.227140e-01  | 0.999995089 | 1.877507e-01  | 0.9996259 |

|                         |               |           |               |             |               |           |
|-------------------------|---------------|-----------|---------------|-------------|---------------|-----------|
| PEPD-HUMAN              | -0.0847113269 | 0.9989736 | -2.804423e-01 | 0.999995089 | 9.631975e-02  | 0.9996259 |
| RN123-HUMAN             | 0.0773891067  | 0.9989736 | 1.172505e-01  | 0.999995089 | 9.074804e-02  | 0.9996259 |
| RAB5B-HUMAN             | 0.0209944713  | 0.9989736 | 9.830456e-02  | 0.999995089 | 1.572277e-01  | 0.9996259 |
| KCY-HUMAN               | 0.2842311075  | 0.9989736 | 1.526153e-01  | 0.999995089 | -4.858618e-02 | 0.9996259 |
| CBPN-HUMAN              | -0.1193677803 | 0.9989736 | -2.396967e-01 | 0.999995089 | -6.516739e-02 | 0.9996259 |
| PRDX5-HUMAN             | 0.0662408789  | 0.9989736 | 7.199227e-03  | 0.999995089 | -8.102464e-02 | 0.9996259 |
| TNG2-HUMAN              | -0.0507771942 | 0.9989736 | 1.412653e-01  | 0.999995089 | 1.693693e-02  | 0.9996259 |
| ABHEB-HUMAN             | -0.0513004283 | 0.9989736 | -4.624140e-02 | 0.999995089 | -1.858239e-01 | 0.9996259 |
| PA2G4-HUMAN             | -0.0166752316 | 0.9989736 | -1.744223e-02 | 0.999995089 | -2.589825e-02 | 0.9996259 |
| CD47-HUMAN              | 0.2238369363  | 0.9989736 | 9.643545e-02  | 0.999995089 | -3.949584e-03 | 0.9996259 |
| TMOD1-HUMAN             | -0.1166922386 | 0.9989736 | 1.124002e-01  | 0.999995089 | -1.426656e-01 | 0.9996259 |
| TBA1B-HUMAN             | -0.0806050377 | 0.9989736 | 2.439899e-02  | 0.999995089 | -1.151305e-01 | 0.9996259 |
| C1R-HUMAN               | 0.0211998756  | 0.9989736 | -1.367970e-01 | 0.999995089 | 1.185578e-02  | 0.9996259 |
| KVD33-HUMAN;KV133-HUMAN | 0.0057213430  | 0.9989736 | 1.389250e-01  | 0.999995089 | -8.049787e-02 | 0.9996259 |
| TBB4B-HUMAN             | -0.0813309887 | 0.9989736 | -5.024638e-02 | 0.999995089 | -5.302430e-02 | 0.9996259 |
| PRS6A-HUMAN             | -0.0532306879 | 0.9989736 | 7.659611e-02  | 0.999995089 | -9.932038e-03 | 0.9996259 |
| ARPC5-HUMAN             | 0.0280197660  | 0.9989736 | -1.093861e-01 | 0.999995089 | 8.332051e-02  | 0.9996259 |
| ETFA-HUMAN              | -0.1664709931 | 0.9989736 | 3.868004e-02  | 0.999995089 | -5.017691e-02 | 0.9996259 |
| UCHL3-HUMAN             | -0.0988381900 | 0.9989736 | 3.238188e-02  | 0.999995089 | -2.439171e-01 | 0.9996259 |
| APT-HUMAN               | -0.0091931676 | 0.9989736 | 1.012755e-01  | 0.999995089 | 1.997858e-01  | 0.9996259 |
| FA10-HUMAN              | -0.2447574134 | 0.9989736 | -6.069616e-02 | 0.999995089 | 8.677989e-02  | 0.9996259 |
| PCBP1-HUMAN             | 0.0324565957  | 0.9989736 | 9.782394e-03  | 0.999995089 | 1.646859e-01  | 0.9996259 |
| F13A-HUMAN              | 0.0265638038  | 0.9989736 | -1.739593e-01 | 0.999995089 | 3.815745e-02  | 0.9996259 |
| DHPR-HUMAN              | 0.1585359722  | 0.9989736 | 1.182169e-01  | 0.999995089 | 4.491360e-02  | 0.9996259 |
| ITIH3-HUMAN             | 0.2143813484  | 0.9989736 | -4.789589e-02 | 0.999995089 | -6.166178e-02 | 0.9996259 |
| WBP2-HUMAN              | 0.0724303197  | 0.9989736 | 1.739718e-01  | 0.999995089 | 2.138827e-01  | 0.9996259 |
| ARG11-HUMAN             | -0.2567327300 | 0.9989736 | 5.162354e-02  | 0.999995089 | -3.316855e-01 | 0.9996259 |
| IF6-HUMAN               | -0.0942003568 | 0.9989736 | -1.565080e-02 | 0.999995089 | -1.271380e-01 | 0.9996259 |
| TPP2-HUMAN              | -0.1214092490 | 0.9989736 | 4.150768e-02  | 0.999995089 | 8.184750e-03  | 0.9996259 |
| PSMD5-HUMAN             | 0.1615466284  | 0.9989736 | 1.298648e-01  | 0.999995089 | -1.817771e-01 | 0.9996259 |
| ARK72-HUMAN             | -0.2709077151 | 0.9989736 | 1.420675e-01  | 0.999995089 | -1.349163e-01 | 0.9996259 |
| ML12B-HUMAN;ML12A-HUMAN | -0.0795559411 | 0.9989736 | -2.220863e-02 | 0.999995089 | -8.264628e-03 | 0.9996259 |
| GGCT-HUMAN              | -0.2407758345 | 0.9989736 | -6.136757e-02 | 0.999995089 | 1.733306e-01  | 0.9996259 |
| GET3-HUMAN              | -0.1357312065 | 0.9989736 | 2.697675e-02  | 0.999995089 | 9.146261e-02  | 0.9996259 |
| CBR1-HUMAN              | 0.1118384207  | 0.9989736 | 2.142489e-01  | 0.999995089 | 1.600306e-02  | 0.9996259 |
| PUR4-HUMAN              | -0.0529020723 | 0.9989736 | 2.696068e-01  | 0.999995089 | 6.395353e-02  | 0.9996259 |
| SAMP-HUMAN              | -0.1949896303 | 0.9989736 | -1.036585e-01 | 0.999995089 | -8.235078e-02 | 0.9996259 |
| HV372-HUMAN             | 0.2251275378  | 0.9989736 | 1.049617e-01  | 0.999995089 | -2.106028e-02 | 0.9996259 |
| CSN1-HUMAN              | 0.0013549470  | 0.9989736 | -9.971884e-02 | 0.999995089 | 1.036944e-02  | 0.9996259 |
| FHR2-HUMAN              | 0.1278036776  | 0.9989736 | -7.102872e-02 | 0.999995089 | -5.172914e-02 | 0.9996259 |
| TPM1-HUMAN              | -0.0294863778 | 0.9989736 | -9.309992e-02 | 0.999995089 | 3.918488e-02  | 0.9996259 |
| PFKAL-HUMAN             | -0.3468028315 | 0.9989736 | -4.356021e-02 | 0.999995089 | 4.112162e-02  | 0.9996259 |
| HSP74-HUMAN             | -0.1496275667 | 0.9989736 | 2.066705e-01  | 0.999995089 | -3.067622e-02 | 0.9996259 |
| KPRB-HUMAN              | 0.0366597876  | 0.9989736 | 1.043119e-01  | 0.999995089 | -1.727076e-02 | 0.9996259 |
| FA9-HUMAN               | -0.0671444859 | 0.9989736 | -3.843507e-02 | 0.999995089 | 3.630026e-01  | 0.9996259 |
| PGP-HUMAN               | -0.2088367521 | 0.9989736 | -9.083133e-03 | 0.999995089 | 3.868248e-02  | 0.9996259 |
| KRT83-HUMAN             | 0.0648504989  | 0.9989736 | 5.047509e-02  | 0.999995089 | 8.937080e-02  | 0.9996259 |
| TENA-HUMAN              | 0.0968902809  | 0.9989736 | 1.567359e-01  | 0.999995089 | -1.161172e-02 | 0.9996259 |
| PUR8-HUMAN              | -0.0319832815 | 0.9989736 | 1.971825e-02  | 0.999995089 | 3.283927e-03  | 0.9996259 |
| CT027-HUMAN             | 0.0230109614  | 0.9989736 | 1.655709e-02  | 0.999995089 | -6.431194e-02 | 0.9996259 |
| S14L4-HUMAN             | 0.0739428674  | 0.9989736 | -1.031032e-01 | 0.999995089 | 2.981087e-02  | 0.9996259 |
| CBG-HUMAN               | 0.0353124151  | 0.9989736 | -7.862551e-02 | 0.999995089 | 2.084026e-02  | 0.9996259 |
| CYBR1-HUMAN             | 0.2357992985  | 0.9989736 | 7.573342e-02  | 0.999995089 | -2.426226e-03 | 0.9996259 |
| LEG3-HUMAN              | -0.0359048889 | 0.9989736 | 3.837066e-02  | 0.999995089 | -1.506144e-01 | 0.9996259 |
| DCNL1-HUMAN             | 0.2676048289  | 0.9989736 | -6.496259e-02 | 0.999995089 | -2.561467e-01 | 0.9996259 |
| ICLN-HUMAN              | 0.1280431665  | 0.9989736 | -1.290711e-01 | 0.999995089 | -1.124725e-01 | 0.9996259 |
| 1433G-HUMAN             | -0.0059753552 | 0.9989736 | -6.990145e-02 | 0.999995089 | -1.100858e-01 | 0.9996259 |
| RD23B-HUMAN             | -0.1895882486 | 0.9989736 | 7.720707e-02  | 0.999995089 | -3.139259e-02 | 0.9996259 |
| FHR4-HUMAN              | -0.1090020492 | 0.9989736 | -2.662241e-01 | 0.999995089 | -7.738182e-02 | 0.9996259 |
| FLOT2-HUMAN             | 0.2064843671  | 0.9989736 | 8.814227e-02  | 0.999995089 | -4.585033e-02 | 0.9996259 |
| KV137-HUMAN;KVD37-HUMAN | -0.1118783757 | 0.9989736 | 4.914676e-02  | 0.999995089 | 6.547899e-04  | 0.9996259 |
| FCN3-HUMAN              | -0.1572646604 | 0.9989736 | -4.276339e-02 | 0.999995089 | -1.464333e-01 | 0.9996259 |
| UB2V2-HUMAN             | 0.0932353091  | 0.9989736 | 4.610397e-02  | 0.999995089 | -1.107024e-01 | 0.9996259 |
| 1433T-HUMAN             | 0.0243011604  | 0.9989736 | -7.060350e-02 | 0.999995089 | 1.560077e-02  | 0.9996259 |
| RB11A-HUMAN;RB11B-HUMAN | 0.0313481685  | 0.9989736 | 9.129746e-03  | 0.999995089 | 2.806395e-02  | 0.9996259 |
| TBA1A-HUMAN             | 0.1409306677  | 0.9989736 | 1.915330e-01  | 0.999995089 | -2.255083e-01 | 0.9996259 |
| LIS1-HUMAN              | -0.1603674148 | 0.9989736 | -1.545750e-01 | 0.999995089 | -1.115237e-01 | 0.9996259 |
| AL9A1-HUMAN             | 0.0544699724  | 0.9989736 | 2.595798e-02  | 0.999995089 | -8.980643e-02 | 0.9996259 |
| RUVB2-HUMAN             | -0.0507549552 | 0.9989736 | -9.535338e-02 | 0.999995089 | 3.521735e-02  | 0.9996259 |
| TTL12-HUMAN             | 0.0617276661  | 0.9989736 | 9.057661e-02  | 0.999995089 | 5.199820e-03  | 0.9996259 |
| PPME1-HUMAN             | -0.1863675141 | 0.9989736 | 1.497171e-01  | 0.999995089 | -7.852247e-02 | 0.9996259 |
| SIA10-HUMAN             | 0.1279748636  | 0.9989736 | 1.080449e-01  | 0.999995089 | 9.546079e-02  | 0.9996259 |

|                                             |               |           |               |             |               |           |
|---------------------------------------------|---------------|-----------|---------------|-------------|---------------|-----------|
| CLH1-HUMAN                                  | 0.0171863322  | 0.9989736 | -7.307841e-02 | 0.999995089 | 8.392375e-02  | 0.9996259 |
| PCBP2-HUMAN                                 | 0.0202040721  | 0.9989736 | -1.011815e-01 | 0.999995089 | 1.323370e-01  | 0.9996259 |
| ACTZ-HUMAN                                  | 0.0941404373  | 0.9989736 | 2.095172e-01  | 0.999995089 | -3.507178e-01 | 0.9996259 |
| MTAP-HUMAN                                  | 0.1666903903  | 0.9989736 | -1.060381e-01 | 0.999995089 | -6.667148e-02 | 0.9996259 |
| PP1R7-HUMAN                                 | 0.2577163611  | 0.9989736 | -1.329303e-02 | 0.999995089 | -1.653817e-01 | 0.9996259 |
| HV102-HUMAN                                 | 0.0295023858  | 0.9989736 | 1.083346e-01  | 0.999995089 | -1.050081e-01 | 0.9996259 |
| NSF-HUMAN                                   | 0.1722616608  | 0.9989736 | 1.229027e-01  | 0.999995089 | 3.428807e-01  | 0.9996259 |
| DESP-HUMAN                                  | 0.0922574387  | 0.9989736 | 2.495247e-03  | 0.999995089 | 1.901145e-01  | 0.9996259 |
| KAIN-HUMAN                                  | 0.0267779192  | 0.9989736 | -1.141690e-01 | 0.999995089 | 2.389321e-01  | 0.9996259 |
| FETUB-HUMAN                                 | -0.0189708155 | 0.9989736 | -1.121265e-01 | 0.999995089 | -3.861922e-02 | 0.9996259 |
| TBA4A-HUMAN                                 | 0.0348819876  | 0.9989736 | -1.533044e-01 | 0.999995089 | 2.263036e-02  | 0.9996259 |
| PERE-HUMAN                                  | 0.3608306208  | 0.9989736 | 4.404411e-02  | 0.999995089 | 1.429364e-01  | 0.9996259 |
| H15-HUMAN                                   | 0.1040898279  | 0.9989736 | 1.406843e-02  | 0.999995089 | 1.105456e-01  | 0.9996259 |
| VATA-HUMAN                                  | -0.1670834333 | 0.9989736 | 9.730948e-02  | 0.999995089 | -7.873373e-02 | 0.9996259 |
| GDIR2-HUMAN                                 | 0.0793634543  | 0.9989736 | 1.174533e-01  | 0.999995089 | 1.153091e-01  | 0.9996259 |
| VCAM1-HUMAN                                 | -0.1700541314 | 0.9989736 | 1.153482e-01  | 0.999995089 | -1.211765e-01 | 0.9996259 |
| A16A1-HUMAN                                 | -0.2333186644 | 0.9989736 | 4.489455e-02  | 0.999995089 | 1.170685e-01  | 0.9996259 |
| PTGDS-HUMAN                                 | -0.0529817177 | 0.9989736 | 1.710225e-01  | 0.999995089 | -6.330986e-02 | 0.9996259 |
| PSB3-HUMAN                                  | -0.0699658867 | 0.9989736 | 2.578666e-01  | 0.999995089 | 3.159607e-02  | 0.9996259 |
| UGPA-HUMAN                                  | -0.1568890711 | 0.9989736 | -8.624844e-02 | 0.999995089 | -9.757000e-02 | 0.9996259 |
| PLEK-HUMAN                                  | 0.0440501612  | 0.9989736 | -2.713720e-02 | 0.999995089 | -1.379052e-01 | 0.9996259 |
| PSA2-HUMAN                                  | -0.0141333752 | 0.9989736 | 2.753098e-01  | 0.999995089 | -1.569965e-01 | 0.9996259 |
| HV428-HUMAN                                 | 0.2682999225  | 0.9989736 | 1.725871e-01  | 0.999995089 | -1.424900e-01 | 0.9996259 |
| IPO9-HUMAN                                  | 0.0443844452  | 0.9989736 | 1.351284e-01  | 0.999995089 | -1.879754e-01 | 0.9996259 |
| GLRX3-HUMAN                                 | 0.0704580448  | 0.9989736 | 1.463751e-01  | 0.999995089 | 2.620164e-02  | 0.9996259 |
| TXD17-HUMAN                                 | -0.0516377742 | 0.9989736 | 5.656692e-02  | 0.999995089 | -1.456962e-01 | 0.9996259 |
| CD59-HUMAN                                  | 0.1960835351  | 0.9989736 | 1.206391e-01  | 0.999995089 | -1.210315e-02 | 0.9996259 |
| FSCN1-HUMAN                                 | -0.0689371243 | 0.9989736 | -1.970536e-01 | 0.999995089 | -2.757626e-02 | 0.9996259 |
| RIDA-HUMAN                                  | -0.1519441821 | 0.9989736 | -2.783765e-02 | 0.999995089 | -1.425504e-01 | 0.9996259 |
| LANC1-HUMAN                                 | 0.1247943905  | 0.9989736 | 1.794043e-01  | 0.999995089 | -2.641347e-01 | 0.9996259 |
| RHCE-HUMAN                                  | 0.2934625308  | 0.9989736 | 1.043303e-01  | 0.999995089 | -7.744899e-02 | 0.9996259 |
| PDC6I-HUMAN                                 | -0.1356412061 | 0.9989736 | -5.692939e-02 | 0.999995089 | 1.402054e-02  | 0.9996259 |
| KJ01-HUMAN                                  | 0.2606283735  | 0.9989736 | 3.750527e-02  | 0.999995089 | 2.133006e-01  | 0.9996259 |
| FBLN1-HUMAN                                 | 0.3356833943  | 0.9989736 | -1.269967e-01 | 0.999995089 | -1.141144e-01 | 0.9996259 |
| HV364-HUMAN                                 | 0.0051155450  | 0.9989736 | 1.210815e-01  | 0.999995089 | -1.864761e-01 | 0.9996259 |
| PSDE-HUMAN                                  | -0.3165590664 | 0.9989736 | 1.476201e-01  | 0.999995089 | 5.841329e-02  | 0.9996259 |
| VWF-HUMAN                                   | 0.0339259566  | 0.9989736 | -6.764031e-03 | 0.999995089 | -2.323409e-02 | 0.9996259 |
| CAPZB-HUMAN                                 | 0.0033497165  | 0.9989736 | -2.779976e-02 | 0.999995089 | -2.021693e-01 | 0.9996259 |
| PHLD-HUMAN                                  | -0.1613233404 | 0.9989736 | 9.869079e-02  | 0.999995089 | 1.996869e-01  | 0.9996259 |
| PPIL3-HUMAN                                 | 0.1326847301  | 0.9989736 | 6.087972e-02  | 0.999995089 | 2.238742e-02  | 0.9996259 |
| KV117-HUMAN                                 | 0.0118546614  | 0.9989736 | 2.538775e-02  | 0.999995089 | 6.930438e-02  | 0.9996259 |
| RASK-HUMAN                                  | 0.1161589937  | 0.9989736 | 1.049424e-01  | 0.999995089 | -1.037842e-01 | 0.9996259 |
| LV208-HUMAN                                 | -0.1718321683 | 0.9989736 | 1.680931e-01  | 0.999995089 | -4.159976e-02 | 0.9996259 |
| IF4B-HUMAN                                  | -0.0893325353 | 0.9989736 | -2.305626e-02 | 0.999995089 | 1.368622e-02  | 0.9996259 |
| PGM2L-HUMAN                                 | 0.1837947801  | 0.9989736 | 8.306156e-02  | 0.999995089 | -2.663226e-01 | 0.9996259 |
| 2AAB-HUMAN                                  | -0.0335760274 | 0.9989736 | -5.024370e-02 | 0.999995089 | -7.831035e-02 | 0.9996259 |
| PRS10-HUMAN                                 | -0.0647960279 | 0.9989736 | 1.499820e-01  | 0.999995089 | 4.643968e-02  | 0.9996259 |
| DYN2-HUMAN                                  | -0.0933228504 | 0.9989736 | -8.509629e-02 | 0.999995089 | 1.046477e-01  | 0.9996259 |
| CYB5-HUMAN                                  | 0.0278370051  | 0.9989736 | -1.392042e-02 | 0.999995089 | -1.428699e-01 | 0.9996259 |
| GSTM3-HUMAN                                 | -0.2463347638 | 0.9989736 | 9.248734e-02  | 0.999995089 | -7.133599e-02 | 0.9996259 |
| NB5R3-HUMAN                                 | -0.0418174761 | 0.9989736 | -1.544588e-02 | 0.999995089 | -1.883687e-02 | 0.9996259 |
| PROF1-HUMAN                                 | 0.0530414433  | 0.9989736 | -3.311146e-03 | 0.999995089 | 4.029488e-02  | 0.9996259 |
| HV124-HUMAN                                 | 0.1550539157  | 0.9989736 | -2.814262e-01 | 0.999995089 | 3.641722e-02  | 0.9996259 |
| ADT2-HUMAN;ADT1-HUMAN;ADT3-HUMAN;ADT4-HUMAN | 0.1026992191  | 0.9989736 | 1.189177e-01  | 0.999995089 | -3.826283e-02 | 0.9996259 |
| LV949-HUMAN                                 | -0.1326154776 | 0.9989736 | 1.027504e-01  | 0.999995089 | 1.467710e-01  | 0.9996259 |
| ANXA1-HUMAN                                 | 0.0954078112  | 0.9989736 | -8.778482e-02 | 0.999995089 | 5.298148e-02  | 0.9996259 |
| IF2G-HUMAN                                  | 0.0421428771  | 0.9989736 | 7.441181e-02  | 0.999995089 | 2.096334e-01  | 0.9996259 |
| BROX-HUMAN                                  | -0.0693045164 | 0.9989736 | 2.015901e-01  | 0.999995089 | 1.504840e-01  | 0.9996259 |
| CNRP1-HUMAN                                 | 0.1329379973  | 0.9989736 | -6.250702e-06 | 0.999995089 | -3.131195e-02 | 0.9996259 |
| MGST2-HUMAN                                 | 0.0316761093  | 0.9989736 | 5.020312e-02  | 0.999995089 | 5.150375e-02  | 0.9996259 |
| PRG2-HUMAN                                  | 0.0563079994  | 0.9989736 | 4.942136e-02  | 0.999995089 | 2.620453e-01  | 0.9996259 |
| FABP5-HUMAN                                 | 0.0156059144  | 0.9989736 | 9.935462e-02  | 0.999995089 | 5.499774e-02  | 0.9996259 |
| IPYR-HUMAN                                  | -0.0947249263 | 0.9989736 | 1.460469e-01  | 0.999995089 | -2.220534e-02 | 0.9996259 |
| KVD16-HUMAN                                 | 0.2114159942  | 0.9989736 | 1.012881e-01  | 0.999995089 | 2.241919e-01  | 0.9996259 |
| MISSL-HUMAN                                 | 0.2106133255  | 0.9989736 | -1.959743e-02 | 0.999995089 | -1.152457e-01 | 0.9996259 |
| CUL3-HUMAN                                  | -0.1799169782 | 0.9989736 | -4.171184e-02 | 0.999995089 | -2.383274e-01 | 0.9996259 |
| DDB1-HUMAN                                  | -0.0176800947 | 0.9989736 | 6.468928e-02  | 0.999995089 | -1.636943e-01 | 0.9996259 |
| NGAL-HUMAN                                  | 0.2023150548  | 0.9989736 | 2.071420e-02  | 0.999995089 | -4.726717e-02 | 0.9996259 |
| RAB10-HUMAN                                 | 0.2356631657  | 0.9989736 | 9.417607e-02  | 0.999995089 | -8.414614e-02 | 0.9996259 |
| IMA4-HUMAN                                  | -0.1528358599 | 0.9989736 | -1.716778e-01 | 0.999995089 | 1.149023e-01  | 0.9996259 |
| LV211-HUMAN                                 | -0.0622499269 | 0.9989736 | 4.600051e-02  | 0.999995089 | -1.244172e-01 | 0.9996259 |
| IGF2-HUMAN                                  | -0.0424444751 | 0.9989736 | 4.376322e-02  | 0.999995089 | 1.427544e-01  | 0.9996259 |



|                         |               |           |               |             |               |           |
|-------------------------|---------------|-----------|---------------|-------------|---------------|-----------|
| RAP2B-HUMAN             | 0.2250157793  | 0.9989736 | 5.942097e-02  | 0.999995089 | -6.707804e-02 | 0.9996259 |
| PSMD6-HUMAN             | -0.0047118079 | 0.9989736 | 5.234965e-02  | 0.999995089 | 4.944526e-02  | 0.9996259 |
| TBB5-HUMAN              | 0.0300349651  | 0.9989736 | -2.526206e-02 | 0.999995089 | -2.122021e-01 | 0.9996259 |
| RAB35-HUMAN             | 0.2837245568  | 0.9989736 | -2.350447e-01 | 0.999995089 | -1.661692e-01 | 0.9996259 |
| KV240-HUMAN;KVD40-HUMAN | 0.1874090607  | 0.9989736 | 1.358651e-01  | 0.999995089 | 7.336187e-02  | 0.9996259 |
| LASP1-HUMAN             | 0.0691665988  | 0.9989736 | 1.098074e-01  | 0.999995089 | 1.504171e-01  | 0.9996259 |
| PSMD1-HUMAN             | -0.0475621494 | 0.9989736 | 6.095476e-02  | 0.999995089 | 4.398108e-03  | 0.9996259 |
| CI040-HUMAN             | 0.0997293423  | 0.9989736 | 3.924642e-02  | 0.999995089 | -3.560898e-02 | 0.9996259 |
| MIEN1-HUMAN             | -0.2129609846 | 0.9989736 | 2.058189e-01  | 0.999995089 | -1.680028e-01 | 0.9996259 |
| KVD08-HUMAN             | 0.3040257218  | 0.9989736 | 7.783574e-02  | 0.999995089 | 1.263689e-01  | 0.9996259 |
| TBB1-HUMAN              | -0.0216344977 | 0.9989736 | -4.100705e-02 | 0.999995089 | -3.533256e-02 | 0.9996259 |
| EHD1-HUMAN              | 0.0108773086  | 0.9989736 | 2.153272e-03  | 0.999995089 | 9.617951e-02  | 0.9996259 |
| MEP50-HUMAN             | 0.0862988388  | 0.9989736 | -3.269808e-02 | 0.999995089 | -1.219958e-02 | 0.9996259 |
| PRS8-HUMAN              | -0.1251383601 | 0.9989736 | 1.444115e-01  | 0.999995089 | -4.265768e-02 | 0.9996259 |
| HV343-HUMAN             | 0.2999865182  | 0.9989736 | 4.759073e-02  | 0.999995089 | -1.462128e-01 | 0.9996259 |
| COR1A-HUMAN             | 0.1984460034  | 0.9989736 | -8.135744e-02 | 0.999995089 | 3.116230e-02  | 0.9996259 |
| GBB1-HUMAN              | 0.0287316233  | 0.9989736 | 1.603416e-02  | 0.999995089 | 7.198577e-03  | 0.9996259 |
| RSU1-HUMAN              | 0.0588530717  | 0.9989736 | -1.800331e-02 | 0.999995089 | 1.740642e-01  | 0.9996259 |
| UFC1-HUMAN              | -0.0808817511 | 0.9989736 | -2.479931e-02 | 0.999995089 | -2.072557e-01 | 0.9996259 |
| FA5-HUMAN               | 0.1059795831  | 0.9989736 | -4.915219e-02 | 0.999995089 | 1.397093e-03  | 0.9996259 |
| SRXN1-HUMAN             | -0.0851233839 | 0.9989736 | 2.606773e-01  | 0.999995089 | 8.056378e-02  | 0.9996259 |
| ABRAL-HUMAN             | 0.0664354269  | 0.9989736 | 2.968680e-02  | 0.999995089 | -2.380627e-01 | 0.9996259 |
| FPPS-HUMAN              | -0.2805097840 | 0.9989736 | 1.805744e-01  | 0.999995089 | 1.323699e-01  | 0.9996259 |
| PDCD6-HUMAN             | 0.1075106581  | 0.9989736 | -2.282605e-01 | 0.999995089 | 1.960610e-01  | 0.9996259 |
| STAM1-HUMAN             | 0.1363813444  | 0.9989736 | 1.326543e-01  | 0.999995089 | -2.478978e-01 | 0.9996259 |
| C1TC-HUMAN              | 0.0296184070  | 0.9989736 | 4.684401e-02  | 0.999995089 | -7.047622e-02 | 0.9996259 |
| PSD10-HUMAN             | -0.1267438083 | 0.9989736 | -9.971844e-02 | 0.999995089 | -1.199574e-01 | 0.9996259 |
| GRHPR-HUMAN             | -0.0875770770 | 0.9989736 | -1.325566e-01 | 0.999995089 | 2.333423e-02  | 0.9996259 |
| PSMD4-HUMAN             | -0.1198272165 | 0.9989736 | 1.390168e-01  | 0.999995089 | -1.652300e-01 | 0.9996259 |
| MK01-HUMAN              | -0.1625741520 | 0.9989736 | 7.514102e-02  | 0.999995089 | 3.466994e-01  | 0.9996259 |
| SYDC-HUMAN              | 0.1034829887  | 0.9989736 | 9.728317e-02  | 0.999995089 | 1.897350e-01  | 0.9996259 |
| C4BPB-HUMAN             | -0.0537188313 | 0.9989736 | -3.244015e-02 | 0.999995089 | -1.508277e-02 | 0.9996259 |
| MASP1-HUMAN             | -0.1451024438 | 0.9989736 | -1.027420e-01 | 0.999995089 | -1.304335e-01 | 0.9996259 |
| CRKL-HUMAN              | 0.1169569296  | 0.9989736 | 2.069202e-01  | 0.999995089 | 2.863517e-02  | 0.9996259 |
| GDIR1-HUMAN             | -0.0091306413 | 0.9989736 | 9.797537e-02  | 0.999995089 | 1.119630e-01  | 0.9996259 |
| LV140-HUMAN             | 0.0163499294  | 0.9989736 | 2.303423e-01  | 0.999995089 | -1.545082e-01 | 0.9996259 |
| CDC42-HUMAN             | 0.2675034352  | 0.9989736 | 1.037522e-01  | 0.999995089 | -1.199003e-01 | 0.9996259 |
| HNRPD-HUMAN             | -0.2396845849 | 0.9989736 | 4.046216e-02  | 0.999995089 | -1.401428e-01 | 0.9996259 |
| ATRN-HUMAN              | 0.0846092701  | 0.9989736 | -1.800498e-01 | 0.999995089 | 1.094065e-01  | 0.9996259 |
| UBA5-HUMAN              | -0.0461612992 | 0.9989736 | 7.998597e-02  | 0.999995089 | -9.543138e-02 | 0.9996259 |
| GAPD1-HUMAN             | -0.1009448400 | 0.9989736 | 9.029860e-02  | 0.999995089 | -3.944544e-03 | 0.9996259 |
| PFKAM-HUMAN             | -0.3293980099 | 0.9989736 | 7.627322e-02  | 0.999995089 | -1.874583e-01 | 0.9996259 |
| RLA0-HUMAN;RLA0L-HUMAN  | 0.2089872785  | 0.9989736 | 1.666386e-01  | 0.999995089 | 1.701055e-01  | 0.9996259 |
| CMBL-HUMAN              | -0.0717564139 | 0.9989736 | 9.806553e-02  | 0.999995089 | 2.814639e-01  | 0.9996259 |
| OTUB1-HUMAN             | 0.1014202397  | 0.9989736 | 1.036072e-01  | 0.999995089 | -3.116428e-02 | 0.9996259 |
| NUDC2-HUMAN             | -0.0388550356 | 0.9989736 | 2.505282e-02  | 0.999995089 | 1.939922e-01  | 0.9996259 |
| CSN7B-HUMAN             | -0.0794362392 | 0.9989736 | -2.359800e-01 | 0.999995089 | -1.032570e-02 | 0.9996259 |
| PROP-HUMAN              | -0.0823968484 | 0.9989736 | 9.441760e-07  | 0.999995089 | 7.068765e-02  | 0.9996259 |
| KV105-HUMAN             | 0.1301073978  | 0.9989736 | 9.647788e-02  | 0.999995089 | -8.725502e-02 | 0.9996259 |
| MYL4-HUMAN              | -0.2167686084 | 0.9989736 | 1.360789e-01  | 0.999995089 | 3.671835e-02  | 0.9996259 |
| GDIA-HUMAN              | -0.0316787306 | 0.9989736 | 1.532815e-01  | 0.999995089 | -3.531216e-02 | 0.9996259 |
| HV349-HUMAN             | -0.1060292517 | 0.9989736 | 5.151457e-02  | 0.999995089 | 8.193658e-02  | 0.9996259 |
| ADHX-HUMAN              | 0.0578824340  | 0.9989736 | 1.509613e-01  | 0.999995089 | -3.159269e-01 | 0.9996259 |
| CZIB-HUMAN              | -0.4533108165 | 0.9989736 | 1.049583e-01  | 0.999995089 | -1.151695e-01 | 0.9996259 |
| CISD2-HUMAN             | 0.0902650181  | 0.9989736 | 3.807242e-02  | 0.999995089 | -1.567997e-01 | 0.9996259 |
| KAP0-HUMAN              | 0.0242328091  | 0.9989736 | 2.778130e-02  | 0.999995089 | 4.966824e-02  | 0.9996259 |
| FUMH-HUMAN              | -0.0233001924 | 0.9989736 | 2.090266e-01  | 0.999995089 | 2.398634e-02  | 0.9996259 |
| F13B-HUMAN              | 0.0099640602  | 0.9989736 | -4.538898e-02 | 0.999995089 | 1.027055e-01  | 0.9996259 |
| AP1B1-HUMAN             | -0.2154599399 | 0.9989736 | -2.661351e-01 | 0.999995089 | -6.223178e-02 | 0.9996259 |
| LBP-HUMAN               | 0.2144951211  | 0.9989736 | -9.390878e-02 | 0.999995089 | -1.145999e-01 | 0.9996259 |
| EF1A1-HUMAN;EF1A3-HUMAN | -0.0181468276 | 0.9989736 | -9.108696e-02 | 0.999995089 | 8.904777e-03  | 0.9996259 |
| RAB6A-HUMAN             | -0.1174448794 | 0.9989736 | 7.747257e-02  | 0.999995089 | 3.786486e-02  | 0.9996259 |
| FBLN3-HUMAN             | 0.2690527853  | 0.9989736 | -1.720783e-01 | 0.999995089 | -7.532749e-02 | 0.9996259 |
| CD14-HUMAN              | 0.0447244771  | 0.9989736 | -1.986680e-01 | 0.999995089 | -1.937058e-01 | 0.9996259 |
| VIME-HUMAN              | 0.0434279468  | 0.9989736 | 9.414155e-03  | 0.999995089 | -2.618814e-02 | 0.9996259 |
| AGO2-HUMAN              | -0.0237446796 | 0.9989736 | 1.295836e-03  | 0.999995089 | 1.270155e-01  | 0.9996259 |
| S10AC-HUMAN             | 0.2579411675  | 0.9989736 | 1.097743e-01  | 0.999995089 | 4.739673e-02  | 0.9996259 |
| PLPP-HUMAN              | -0.1157324677 | 0.9989736 | 4.407291e-02  | 0.999995089 | 1.295822e-01  | 0.9996259 |
| PSMD7-HUMAN             | 0.1062290690  | 0.9989736 | 1.657992e-01  | 0.999995089 | -1.986507e-01 | 0.9996259 |
| IPO7-HUMAN              | -0.2330441302 | 0.9989736 | 5.972208e-02  | 0.999995089 | 1.260898e-01  | 0.9996259 |
| HNRPK-HUMAN             | 0.0606898497  | 0.9989736 | 2.621470e-02  | 0.999995089 | -7.359861e-02 | 0.9996259 |
| VATB2-HUMAN             | -0.0548199629 | 0.9989736 | 1.289451e-01  | 0.999995089 | 4.670681e-02  | 0.9996259 |

|             |               |           |               |             |               |           |
|-------------|---------------|-----------|---------------|-------------|---------------|-----------|
| RFESD-HUMAN | 0.0635702033  | 0.9989736 | 6.462410e-02  | 0.999995089 | 1.331741e-01  | 0.9996259 |
| NIF3L-HUMAN | -0.0305456007 | 0.9989736 | -1.521792e-01 | 0.999995089 | -1.421448e-01 | 0.9996259 |
| KT3K-HUMAN  | -0.0655798905 | 0.9989736 | -2.356760e-01 | 0.999995089 | -8.431500e-02 | 0.9996259 |
| NEDD8-HUMAN | -0.0704606122 | 0.9989736 | 6.513055e-02  | 0.999995089 | 1.148243e-01  | 0.9996259 |
| ERMAP-HUMAN | 0.2207425834  | 0.9989736 | 8.735132e-02  | 0.999995089 | -1.793767e-02 | 0.9996259 |
| TKFC-HUMAN  | -0.2236394022 | 0.9989736 | 1.895391e-02  | 0.999995089 | 1.362012e-01  | 0.9996259 |
| DYL2-HUMAN  | -0.0248910967 | 0.9989736 | 2.794982e-02  | 0.999995089 | -1.225110e-01 | 0.9996259 |
| ATG3-HUMAN  | 0.0446617493  | 0.9989736 | 1.156759e-01  | 0.999995089 | 2.515930e-02  | 0.9996259 |
| ACYP1-HUMAN | -0.2017277168 | 0.9989736 | 4.089433e-02  | 0.999995089 | 5.329699e-02  | 0.9996259 |
| AMPL-HUMAN  | -0.0155540088 | 0.9989736 | 1.314480e-01  | 0.999995089 | 1.400717e-01  | 0.9996259 |
| LV218-HUMAN | 0.0203096551  | 0.9989736 | -2.629295e-04 | 0.999995089 | -3.627194e-02 | 0.9996259 |
| PSD13-HUMAN | -0.2129410609 | 0.9989736 | 6.192040e-02  | 0.999995089 | -1.082248e-01 | 0.9996259 |
| GP1BB-HUMAN | 0.1154804812  | 0.9989736 | 8.722265e-02  | 0.999995089 | 1.208245e-02  | 0.9996259 |
| HGFA-HUMAN  | 0.3423676651  | 0.9989736 | 1.614202e-02  | 0.999995089 | 9.583842e-02  | 0.9996259 |
| AT2B4-HUMAN | 0.2312104548  | 0.9989736 | 9.197634e-02  | 0.999995089 | -3.251365e-02 | 0.9996259 |
| GP1BA-HUMAN | 0.1217104494  | 0.9989736 | 2.624962e-03  | 0.999995089 | -2.094926e-01 | 0.9996259 |
| SMIM1-HUMAN | 0.2402044275  | 0.9989736 | 9.530614e-02  | 0.999995089 | -3.910563e-02 | 0.9996259 |
| THOP1-HUMAN | -0.1398479266 | 0.9989736 | -1.697956e-01 | 0.999995089 | 4.791708e-02  | 0.9996259 |
| GSTT1-HUMAN | -0.2327991080 | 0.9989736 | 9.888938e-02  | 0.999995089 | -1.158241e-01 | 0.9996259 |
| ANXA5-HUMAN | 0.1538977876  | 0.9989736 | -1.697022e-01 | 0.999995089 | -2.623664e-02 | 0.9996259 |
| QSOX1-HUMAN | 0.1171290206  | 0.9989736 | -3.230131e-03 | 0.999995089 | 7.109419e-05  | 0.9996259 |
| ITB3-HUMAN  | 0.1572276444  | 0.9989736 | 7.609936e-02  | 0.999995089 | -3.287620e-02 | 0.9996259 |
| CARM1-HUMAN | -0.0866129220 | 0.9989736 | 7.618638e-02  | 0.999995089 | -8.587646e-02 | 0.9996259 |
| LV214-HUMAN | -0.2854613638 | 0.9989736 | 1.037210e-01  | 0.999995089 | -7.180798e-02 | 0.9996259 |
| RAB18-HUMAN | -0.1011616212 | 0.9989736 | 3.758196e-02  | 0.999995089 | -1.515528e-01 | 0.9996259 |
| CSN3-HUMAN  | -0.1533834660 | 0.9989736 | 9.590960e-02  | 0.999995089 | 1.247236e-01  | 0.9996259 |
| CD9-HUMAN   | 0.1298545263  | 0.9989736 | 8.678173e-02  | 0.999995089 | -7.637233e-03 | 0.9996259 |
| LV136-HUMAN | 0.3091331606  | 0.9989736 | -5.666069e-02 | 0.999995089 | -8.269445e-02 | 0.9996259 |
| DNJB2-HUMAN | 0.0592518159  | 0.9989736 | 9.889714e-02  | 0.999995089 | 1.702884e-01  | 0.9996259 |
| ECM1-HUMAN  | -0.0281464850 | 0.9989736 | -9.299772e-02 | 0.999995089 | -7.238174e-02 | 0.9996259 |
| OSCAR-HUMAN | -0.2671947480 | 0.9989736 | 1.500874e-01  | 0.999995089 | -3.327210e-02 | 0.9996259 |
| PDIA6-HUMAN | 0.2078353011  | 0.9989736 | -4.703259e-02 | 0.999995089 | 5.944431e-02  | 0.9996259 |
| HV146-HUMAN | 0.2344118135  | 0.9989736 | 9.288182e-02  | 0.999995089 | -1.724898e-01 | 0.9996259 |
| PPCS-HUMAN  | 0.0189663444  | 0.9989736 | -9.290736e-02 | 0.999995089 | 2.862797e-02  | 0.9996259 |
| ALS-HUMAN   | -0.1921853883 | 0.9989736 | -6.164703e-02 | 0.999995089 | 3.187296e-01  | 0.9996259 |
| SHBG-HUMAN  | 0.2584577455  | 0.9989736 | 8.520353e-03  | 0.999995089 | -1.075588e-01 | 0.9996259 |
| PLTP-HUMAN  | 0.1375751373  | 0.9989736 | 6.455898e-03  | 0.999995089 | 9.350556e-02  | 0.9996259 |
| SYWC-HUMAN  | -0.1407980883 | 0.9989736 | 1.719251e-02  | 0.999995089 | 1.152316e-01  | 0.9996259 |
| GAPR1-HUMAN | 0.2527893874  | 0.9989736 | 1.187723e-01  | 0.999995089 | -4.121074e-02 | 0.9996259 |
| ARPC2-HUMAN | 0.0481922253  | 0.9989736 | -1.541696e-01 | 0.999995089 | 1.461844e-01  | 0.9996259 |
| KTHY-HUMAN  | -0.1013989724 | 0.9989736 | -2.672700e-02 | 0.999995089 | 1.606219e-01  | 0.9996259 |
| DNJB1-HUMAN | -0.1827199881 | 0.9989736 | -3.228163e-02 | 0.999995089 | -2.019068e-01 | 0.9996259 |
| CD44-HUMAN  | 0.2618643895  | 0.9989736 | 5.052834e-02  | 0.999995089 | -7.194153e-02 | 0.9996259 |
| LV657-HUMAN | -0.1259358766 | 0.9989736 | 3.055656e-03  | 0.999995089 | -6.695351e-02 | 0.9996259 |
| CAMP-HUMAN  | 0.1987667554  | 0.9989736 | -6.960201e-02 | 0.999995089 | 1.037854e-01  | 0.9996259 |
| CDK2-HUMAN  | 0.0331616717  | 0.9989736 | 4.227079e-02  | 0.999995089 | -2.146929e-02 | 0.9996259 |
| AMPN-HUMAN  | 0.2309187260  | 0.9989736 | 6.486616e-02  | 0.999995089 | -1.428826e-01 | 0.9996259 |
| HV205-HUMAN | -0.0501440442 | 0.9989736 | 6.088110e-02  | 0.999995089 | 8.846403e-03  | 0.9996259 |
| CSN6-HUMAN  | -0.0840996355 | 0.9989736 | 6.854475e-02  | 0.999995089 | 6.497944e-02  | 0.9996259 |
| GNPI1-HUMAN | -0.1272356681 | 0.9989736 | -2.157575e-01 | 0.999995089 | 2.628970e-02  | 0.9996259 |
| IF2A-HUMAN  | -0.0421246988 | 0.9989736 | 1.117792e-01  | 0.999995089 | 2.336436e-01  | 0.9996259 |
| UBR4-HUMAN  | -0.1338913567 | 0.9989736 | 1.681207e-01  | 0.999995089 | -3.673893e-02 | 0.9996259 |
| IPO5-HUMAN  | 0.1031346840  | 0.9989736 | 8.358223e-02  | 0.999995089 | 7.973135e-02  | 0.9996259 |
| H13-HUMAN   | 0.1516546616  | 0.9989736 | 1.785199e-02  | 0.999995089 | -9.830155e-03 | 0.9996259 |
| BPI-HUMAN   | 0.1863145897  | 0.9989736 | 9.620961e-02  | 0.999995089 | 1.619934e-01  | 0.9996259 |
| ILEU-HUMAN  | 0.0333345652  | 0.9989736 | 2.735213e-02  | 0.999995089 | -2.772379e-02 | 0.9996259 |
| PSMD2-HUMAN | 0.0079840957  | 0.9989736 | 1.059920e-01  | 0.999995089 | 1.018443e-01  | 0.9996259 |
| HV145-HUMAN | -0.1316480623 | 0.9989736 | 7.950684e-02  | 0.999995089 | 2.791980e-02  | 0.9996259 |
| MET7A-HUMAN | 0.1969383794  | 0.9989736 | 1.105447e-01  | 0.999995089 | -6.930987e-02 | 0.9996259 |
| AP2M1-HUMAN | 0.0088928438  | 0.9989736 | -1.158532e-01 | 0.999995089 | 2.539296e-02  | 0.9996259 |
| AP2A1-HUMAN | -0.0970710883 | 0.9989736 | -1.167836e-01 | 0.999995089 | -2.034725e-02 | 0.9996259 |
| TYB10-HUMAN | 0.0891897041  | 0.9989736 | -2.303136e-02 | 0.999995089 | -4.786465e-02 | 0.9996259 |
| LYPA1-HUMAN | 0.0013365464  | 0.9989736 | -1.116861e-01 | 0.999995089 | -1.186442e-01 | 0.9996259 |
| PSD11-HUMAN | -0.1887278959 | 0.9989736 | 4.747523e-02  | 0.999995089 | 2.966515e-02  | 0.9996259 |
| RUVB1-HUMAN | 0.0591104269  | 0.9989736 | -1.027995e-01 | 0.999995089 | -9.537392e-02 | 0.9996259 |
| GMFG-HUMAN  | 0.0313664302  | 0.9989736 | -9.692526e-02 | 0.999995089 | -2.161763e-01 | 0.9996259 |
| IDE-HUMAN   | -0.0372918207 | 0.9989736 | 1.271248e-01  | 0.999995089 | 9.458103e-02  | 0.9996259 |
| RS10-HUMAN  | 0.1529229215  | 0.9989736 | 5.599871e-02  | 0.999995089 | -1.248136e-01 | 0.9996259 |
| AK1A1-HUMAN | -0.0114699977 | 0.9989736 | 3.275045e-02  | 0.999995089 | -7.052621e-02 | 0.9996259 |
| RAP1B-HUMAN | 0.1784075473  | 0.9989736 | 4.444940e-02  | 0.999995089 | 1.606480e-02  | 0.9996259 |
| CYTC-HUMAN  | 0.0651256757  | 0.9989736 | 5.211282e-02  | 0.999995089 | -2.367072e-01 | 0.9996259 |
| CRLF3-HUMAN | -0.2125245950 | 0.9989736 | 3.180325e-02  | 0.999995089 | 1.119229e-01  | 0.9996259 |

|                                     |               |           |               |             |               |           |
|-------------------------------------|---------------|-----------|---------------|-------------|---------------|-----------|
| CRP-HUMAN                           | 0.1728177770  | 0.9989736 | -5.475664e-02 | 0.999995089 | -2.222121e-01 | 0.9996259 |
| PPIB-HUMAN                          | 0.2035157533  | 0.9989736 | 3.814593e-02  | 0.999995089 | 8.491847e-02  | 0.9996259 |
| IF4E-HUMAN                          | -0.0403671129 | 0.9989736 | 1.760360e-01  | 0.999995089 | -3.932223e-02 | 0.9996259 |
| ARP2-HUMAN                          | 0.0375112085  | 0.9989736 | 8.603849e-02  | 0.999995089 | 6.638122e-02  | 0.9996259 |
| MARE1-HUMAN                         | 0.1801657189  | 0.9989736 | -5.502693e-02 | 0.999995089 | 2.341544e-02  | 0.9996259 |
| APOC4-HUMAN                         | -0.0981630399 | 0.9989736 | 5.304757e-02  | 0.999995089 | 2.933367e-01  | 0.9996259 |
| APOF-HUMAN                          | 0.1843810648  | 0.9989736 | 4.229957e-02  | 0.999995089 | 1.179159e-02  | 0.9996259 |
| KV116-HUMAN                         | -0.2374979060 | 0.9989736 | 1.009881e-01  | 0.999995089 | 7.470267e-03  | 0.9996259 |
| PYRG1-HUMAN                         | -0.3620322999 | 0.9989736 | 9.087242e-02  | 0.999995089 | 6.936057e-03  | 0.9996259 |
| EIF3J-HUMAN                         | 0.1338719105  | 0.9989736 | 3.018989e-02  | 0.999995089 | -3.214804e-02 | 0.9996259 |
| EF2-HUMAN                           | -0.0176287741 | 0.9989736 | 1.488743e-01  | 0.999995089 | 1.819962e-01  | 0.9996259 |
| ZYX-HUMAN                           | -0.0462165471 | 0.9989736 | -1.438091e-01 | 0.999995089 | 2.673982e-02  | 0.9996259 |
| CSN8-HUMAN                          | 0.3935724812  | 0.9989736 | 2.473140e-02  | 0.999995089 | 9.032153e-02  | 0.9996259 |
| HBAZ-HUMAN                          | 0.0796755476  | 0.9989736 | -1.520527e-02 | 0.999995089 | -1.716421e-01 | 0.9996259 |
| AP2B1-HUMAN                         | 0.1167488583  | 0.9989736 | -1.689415e-01 | 0.999995089 | -1.534326e-01 | 0.9996259 |
| RTN3-HUMAN                          | -0.3136444043 | 0.9989736 | 5.830782e-02  | 0.999995089 | 9.727732e-02  | 0.9996259 |
| PDE12-HUMAN                         | -0.1394923768 | 0.9989736 | -3.374532e-02 | 0.999995089 | -1.402894e-02 | 0.9996259 |
| LV469-HUMAN                         | 0.0952773462  | 0.9989736 | -2.275347e-01 | 0.999995089 | -2.835905e-01 | 0.9996259 |
| NUDT5-HUMAN                         | -0.0568552851 | 0.9989736 | 3.575518e-03  | 0.999995089 | -1.185333e-01 | 0.9996259 |
| 1433F-HUMAN                         | -0.0942710342 | 0.9989736 | -9.072606e-02 | 0.999995089 | 1.024880e-01  | 0.9996259 |
| PSD12-HUMAN                         | -0.0804076554 | 0.9989736 | 1.258505e-01  | 0.999995089 | -6.969112e-02 | 0.9996259 |
| GMPR2-HUMAN                         | -0.1814715198 | 0.9989736 | -6.782859e-02 | 0.999995089 | 8.007904e-02  | 0.9996259 |
| XPO1-HUMAN                          | -0.1437889731 | 0.9989736 | 1.072634e-01  | 0.999995089 | 5.753888e-02  | 0.9996259 |
| PSMG3-HUMAN                         | -0.1035608502 | 0.9989736 | -8.601928e-02 | 0.999995089 | 4.769265e-02  | 0.9996259 |
| PZP-HUMAN                           | -0.1708888644 | 0.9989736 | 9.668376e-02  | 0.999995089 | 1.796705e-01  | 0.9996259 |
| LV321-HUMAN                         | -0.3149982444 | 0.9989736 | 1.172382e-01  | 0.999995089 | -2.829570e-01 | 0.9996259 |
| DCTN2-HUMAN                         | -0.0918437354 | 0.9989736 | 1.773144e-01  | 0.999995089 | -1.140547e-01 | 0.9996259 |
| ANFY1-HUMAN                         | -0.1283148334 | 0.9989736 | 8.694564e-02  | 0.999995089 | -1.019682e-01 | 0.9996259 |
| BID-HUMAN                           | -0.0435687087 | 0.9989736 | 3.104019e-02  | 0.999995089 | 1.100182e-01  | 0.9996259 |
| PDIA3-HUMAN                         | 0.2145902355  | 0.9989736 | 1.657935e-02  | 0.999995089 | -1.695840e-02 | 0.9996259 |
| TRML1-HUMAN                         | 0.1474290675  | 0.9989736 | 7.565544e-02  | 0.999995089 | -2.445802e-01 | 0.9996259 |
| ENPL-HUMAN                          | 0.2840832647  | 0.9989736 | 2.884895e-02  | 0.999995089 | -1.133092e-01 | 0.9996259 |
| BGH3-HUMAN                          | 0.0808209440  | 0.9989736 | -2.474615e-03 | 0.999995089 | -1.681506e-01 | 0.9996259 |
| CNDP2-HUMAN                         | 0.1123113593  | 0.9989736 | 2.024707e-01  | 0.999995089 | -1.026392e-01 | 0.9996259 |
| PSA-HUMAN                           | -0.0516237048 | 0.9989736 | 5.170280e-02  | 0.999995089 | -1.873672e-01 | 0.9996259 |
| CLCA-HUMAN                          | -0.0936126560 | 0.9989736 | -1.677751e-01 | 0.999995089 | 7.880444e-02  | 0.9996259 |
| ADIPO-HUMAN                         | -0.0319675578 | 0.9989736 | -1.256402e-01 | 0.999995089 | -3.465982e-02 | 0.9996259 |
| LV223-HUMAN                         | 0.0658748577  | 0.9989736 | -2.564776e-01 | 0.999995089 | -1.323265e-01 | 0.9996259 |
| P5CR3-HUMAN                         | 0.1595851702  | 0.9989736 | -2.559730e-02 | 0.999995089 | 9.475843e-02  | 0.9996259 |
| PIPNA-HUMAN                         | -0.0608273999 | 0.9989736 | 8.490030e-02  | 0.999995089 | -1.362843e-01 | 0.9996259 |
| DBNL-HUMAN                          | -0.1220886674 | 0.9989736 | 5.374223e-02  | 0.999995089 | 1.253141e-01  | 0.9996259 |
| RTCA-HUMAN                          | -0.0791282466 | 0.9989736 | -4.480519e-02 | 0.999995089 | -4.022662e-02 | 0.9996259 |
| CFAD-HUMAN                          | 0.0935582078  | 0.9989736 | 4.392187e-03  | 0.999995089 | -1.893930e-01 | 0.9996259 |
| UBXN1-HUMAN                         | -0.2320389939 | 0.9989736 | -2.356064e-02 | 0.999995089 | 5.987284e-02  | 0.9996259 |
| DNJC9-HUMAN                         | 0.1450381583  | 0.9989736 | 1.571500e-01  | 0.999995089 | 1.144034e-01  | 0.9996259 |
| PP1G-HUMAN;PP1A-HUMAN;PP1B-HUMAN    | -0.0187151603 | 0.9989736 | -1.194014e-01 | 0.999995089 | -8.747298e-03 | 0.9996259 |
| MNDA-HUMAN                          | -0.0518057445 | 0.9989736 | 3.741830e-02  | 0.999995089 | -9.398307e-02 | 0.9996259 |
| HSPB1-HUMAN                         | 0.0969012504  | 0.9989736 | 1.795379e-02  | 0.999995089 | -2.267453e-01 | 0.9996259 |
| CUL1-HUMAN                          | 0.0156343079  | 0.9989736 | 1.572909e-01  | 0.999995089 | 5.421180e-02  | 0.9996259 |
| AK1C3-HUMAN                         | 0.0270470595  | 0.9989736 | 1.000980e-01  | 0.999995089 | -1.232505e-01 | 0.9996259 |
| CHLE-HUMAN                          | -0.1108947000 | 0.9989736 | -8.363186e-02 | 0.999995089 | -1.890552e-01 | 0.9996259 |
| GRAN-HUMAN                          | 0.1853655964  | 0.9989736 | -5.390470e-02 | 0.999995089 | -5.468078e-02 | 0.9996259 |
| GMPPB-HUMAN                         | -0.3801111626 | 0.9989736 | 3.664572e-02  | 0.999995089 | -1.000438e-01 | 0.9996259 |
| VPS4B-HUMAN;FIGL1-HUMAN;VPS4A-HUMAN | 0.2282396029  | 0.9989736 | 2.073307e-01  | 0.999995089 | -1.867152e-01 | 0.9996259 |
| RHG01-HUMAN                         | -0.0550093025 | 0.9989736 | -3.373335e-02 | 0.999995089 | -1.706824e-01 | 0.9996259 |
| KELL-HUMAN                          | 0.2308131944  | 0.9989736 | 9.305568e-02  | 0.999995089 | 2.861113e-04  | 0.9996259 |
| ACES-HUMAN                          | 0.0855901394  | 0.9989736 | -9.920565e-02 | 0.999995089 | -1.485887e-02 | 0.9996259 |
| PHP14-HUMAN                         | -0.1339806281 | 0.9989736 | -1.664932e-01 | 0.999995089 | -3.424865e-03 | 0.9996259 |
| CAZA2-HUMAN                         | -0.1437904217 | 0.9989736 | 1.926348e-02  | 0.999995089 | -4.685059e-02 | 0.9996259 |
| CAVN2-HUMAN                         | -0.2795126845 | 0.9989736 | -4.858828e-02 | 0.999995089 | 1.186021e-01  | 0.9996259 |
| ORN-HUMAN                           | -0.0326994403 | 0.9989736 | 3.772545e-03  | 0.999995089 | 1.558854e-01  | 0.9996259 |
| CAP7-HUMAN                          | 0.0862166133  | 0.9989736 | 2.173259e-02  | 0.999995089 | 1.424773e-01  | 0.9996259 |
| IAH1-HUMAN                          | -0.3274035544 | 0.9989736 | -1.391131e-01 | 0.999995089 | -3.735130e-02 | 0.9996259 |
| UT1-HUMAN                           | 0.2445608642  | 0.9989736 | 9.481697e-02  | 0.999995089 | -9.338786e-03 | 0.9996259 |
| KGUA-HUMAN                          | -0.1335570447 | 0.9989736 | 5.944760e-02  | 0.999995089 | -7.679113e-02 | 0.9996259 |
| ICAM2-HUMAN                         | -0.0680637068 | 0.9989736 | 9.339887e-02  | 0.999995089 | -4.612912e-02 | 0.9996259 |
| PHS2-HUMAN                          | 0.0844472963  | 0.9989736 | -3.121575e-02 | 0.999995089 | 1.081043e-02  | 0.9996259 |
| PRG3-HUMAN                          | 0.0370876615  | 0.9989736 | 1.003316e-01  | 0.999995089 | 1.375993e-01  | 0.9996259 |
| CPIN1-HUMAN                         | 0.0436197225  | 0.9989736 | -7.579393e-02 | 0.999995089 | 1.060446e-02  | 0.9996259 |
| SGTA-HUMAN                          | 0.1508231784  | 0.9989736 | -3.806342e-02 | 0.999995089 | 1.487048e-02  | 0.9996259 |
| SGT1-HUMAN                          | 0.0038926513  | 0.9989736 | 6.928032e-02  | 0.999995089 | 1.924582e-01  | 0.9996259 |
| ARPC3-HUMAN                         | 0.1279477288  | 0.9989736 | 9.534410e-02  | 0.999995089 | 1.913331e-01  | 0.9996259 |

|             |               |           |               |             |               |           |
|-------------|---------------|-----------|---------------|-------------|---------------|-----------|
| ATPB-HUMAN  | 0.1492781990  | 0.9989736 | -3.965186e-02 | 0.999995089 | -1.442524e-01 | 0.9996259 |
| LRC20-HUMAN | -0.2454534659 | 0.9989736 | -1.912096e-01 | 0.999995089 | 8.725721e-02  | 0.9996259 |
| IF4A2-HUMAN | -0.0650928766 | 0.9989736 | 1.423067e-01  | 0.999995089 | 1.175187e-01  | 0.9996259 |
| STX7-HUMAN  | 0.1794789598  | 0.9989736 | 8.623552e-02  | 0.999995089 | -7.535998e-02 | 0.9996259 |
| DSG2-HUMAN  | -0.1306561803 | 0.9989736 | 7.783876e-02  | 0.999995089 | -4.110844e-02 | 0.9996259 |
| RAGP1-HUMAN | -0.0578011234 | 0.9989736 | 8.975402e-02  | 0.999995089 | -3.163114e-03 | 0.9996259 |
| IBP6-HUMAN  | 0.2316853373  | 0.9989736 | -2.608840e-02 | 0.999995089 | -3.124127e-01 | 0.9996259 |
| IPSP-HUMAN  | -0.1416237830 | 0.9989736 | 1.397016e-03  | 0.999995089 | -2.398013e-02 | 0.9996259 |
| KV621-HUMAN | -0.2445937224 | 0.9989736 | 2.589172e-02  | 0.999995089 | -9.895427e-02 | 0.9996259 |
| CDC37-HUMAN | 0.0199742055  | 0.9989736 | 6.484998e-02  | 0.999995089 | 5.354457e-02  | 0.9996259 |
| PRS6B-HUMAN | -0.1343200700 | 0.9989736 | 8.332560e-02  | 0.999995089 | 6.943094e-02  | 0.9996259 |
| BLMH-HUMAN  | 0.0429653013  | 0.9989736 | 7.723529e-02  | 0.999995089 | 1.709556e-02  | 0.9996259 |
| PLIN3-HUMAN | 0.0599790753  | 0.9989736 | 2.572374e-01  | 0.999995089 | 1.715255e-01  | 0.9996259 |
| ARPC4-HUMAN | 0.0429450489  | 0.9989736 | -2.396735e-02 | 0.999995089 | -1.330787e-01 | 0.9996259 |
| NIT1-HUMAN  | 0.0146798953  | 0.9989736 | -1.337210e-01 | 0.999995089 | -9.671272e-02 | 0.9996259 |
| FA11-HUMAN  | -0.0137420471 | 0.9989736 | -8.072322e-02 | 0.999995089 | 1.219787e-01  | 0.9996259 |
| NQO2-HUMAN  | -0.0269720860 | 0.9989736 | 6.108577e-02  | 0.999995089 | 1.756855e-02  | 0.9996259 |
| PIN1-HUMAN  | -0.1446171563 | 0.9989736 | 5.192266e-02  | 0.999995089 | 9.751443e-02  | 0.9996259 |
| ENDD1-HUMAN | 0.1908472659  | 0.9989736 | 5.715719e-02  | 0.999995089 | -5.007556e-02 | 0.9996259 |
| XPO2-HUMAN  | 0.1178088252  | 0.9989736 | 3.996470e-02  | 0.999995089 | -4.660443e-02 | 0.9996259 |
| VATG1-HUMAN | -0.0582074933 | 0.9989736 | 3.804071e-01  | 0.999995089 | 6.862126e-02  | 0.9996259 |
| GMDS-HUMAN  | -0.1137805545 | 0.9989736 | 5.347797e-02  | 0.999995089 | 1.057651e-01  | 0.9996259 |
| RBX1-HUMAN  | -0.1705845265 | 0.9989736 | 2.235593e-02  | 0.999995089 | -1.381259e-01 | 0.9996259 |
| TSN-HUMAN   | 0.0765454883  | 0.9989736 | 4.594751e-02  | 0.999995089 | 6.185218e-02  | 0.9996259 |
| KAPCA-HUMAN | 0.0461226347  | 0.9989736 | -2.041420e-01 | 0.999995089 | 1.258355e-02  | 0.9996259 |
| PSMD3-HUMAN | 0.0937284806  | 0.9989736 | 1.157406e-01  | 0.999995089 | 1.273474e-01  | 0.9996259 |
| MTPN-HUMAN  | -0.1354989039 | 0.9989736 | 2.843761e-01  | 0.999995089 | -7.118701e-02 | 0.9996259 |
| PNPO-HUMAN  | 0.1459813172  | 0.9989736 | -1.885807e-01 | 0.999995089 | 1.574075e-01  | 0.9996259 |
| CRAC1-HUMAN | 0.2438818856  | 0.9989736 | 3.955108e-02  | 0.999995089 | -1.144042e-01 | 0.9996259 |
| TMX1-HUMAN  | 0.0647760349  | 0.9989736 | 9.350858e-02  | 0.999995089 | 5.492719e-02  | 0.9996259 |
| IMA3-HUMAN  | -0.0409019240 | 0.9989736 | 1.664753e-01  | 0.999995089 | -2.532884e-01 | 0.9996259 |
| CSN2-HUMAN  | -0.1081283716 | 0.9989736 | -4.862182e-02 | 0.999995089 | 1.551411e-01  | 0.9996259 |
| RAC2-HUMAN  | 0.1087297156  | 0.9989736 | 2.806194e-04  | 0.999995089 | -5.084197e-03 | 0.9996259 |
| DHSO-HUMAN  | -0.2817761878 | 0.9989736 | 3.615796e-02  | 0.999995089 | 6.121337e-02  | 0.9996259 |
| STMN1-HUMAN | -0.0200272127 | 0.9989736 | 2.600654e-02  | 0.999995089 | -6.477222e-02 | 0.9996259 |
| MMP9-HUMAN  | 0.1898594716  | 0.9989736 | 4.099789e-02  | 0.999995089 | 1.287754e-01  | 0.9996259 |
| DYL1-HUMAN  | 0.2606930378  | 0.9989736 | -4.333792e-03 | 0.999995089 | -4.799040e-02 | 0.9996259 |
| FHR5-HUMAN  | 0.1289407751  | 0.9989736 | 4.630755e-02  | 0.999995089 | 1.134011e-02  | 0.9996259 |
| PTN11-HUMAN | -0.0871519171 | 0.9989736 | -1.093954e-01 | 0.999995089 | 2.941763e-01  | 0.9996259 |
| LHPP-HUMAN  | -0.3309851101 | 0.9989736 | -1.601301e-01 | 0.999995089 | -2.891965e-01 | 0.9996259 |
| CETP-HUMAN  | 0.2009346643  | 0.9989736 | -6.284568e-02 | 0.999995089 | -3.163428e-02 | 0.9996259 |
| ULA1-HUMAN  | -0.3658452828 | 0.9989736 | -1.056298e-01 | 0.999995089 | 1.375371e-02  | 0.9996259 |
| SYYC-HUMAN  | -0.0342748875 | 0.9989736 | 5.242123e-02  | 0.999995089 | 1.122531e-01  | 0.9996259 |
| THG1-HUMAN  | 0.0750443461  | 0.9989736 | 1.621268e-01  | 0.999995089 | -4.807978e-02 | 0.9996259 |
| RGS10-HUMAN | -0.1802517224 | 0.9989736 | -5.321880e-02 | 0.999995089 | -3.680263e-02 | 0.9996259 |
| S14L2-HUMAN | 0.0005435141  | 0.9989736 | 9.944192e-02  | 0.999995089 | -9.037650e-02 | 0.9996259 |
| PROC-HUMAN  | -0.2997819828 | 0.9989736 | -1.507143e-01 | 0.999995089 | -9.555280e-02 | 0.9996259 |
| RBBP9-HUMAN | 0.0235847409  | 0.9989736 | 1.730292e-01  | 0.999995089 | -1.922110e-02 | 0.9996259 |
| PDIA1-HUMAN | 0.2451149096  | 0.9989736 | 8.775282e-02  | 0.999995089 | -7.381972e-02 | 0.9996259 |
| VASN-HUMAN  | 0.1522016061  | 0.9989736 | 4.592084e-02  | 0.999995089 | -1.917963e-01 | 0.9996259 |
| TBCEL-HUMAN | -0.0728360518 | 0.9989736 | -9.391872e-02 | 0.999995089 | -2.773620e-02 | 0.9996259 |
| BASI-HUMAN  | 0.2683864133  | 0.9989736 | 9.542059e-02  | 0.999995089 | -5.059863e-02 | 0.9996259 |
| IF5-HUMAN   | 0.0940077459  | 0.9989736 | -6.419754e-02 | 0.999995089 | 2.654386e-02  | 0.9996259 |
| BPNT1-HUMAN | -0.0444555010 | 0.9989736 | 2.708287e-02  | 0.999995089 | -1.490312e-01 | 0.9996259 |
| GMFB-HUMAN  | 0.0579298000  | 0.9989736 | 7.909042e-02  | 0.999995089 | -1.872049e-02 | 0.9996259 |
| ATPA-HUMAN  | 0.1302521224  | 0.9989736 | 5.547193e-02  | 0.999995089 | 9.963370e-03  | 0.9996259 |
| KC1A-HUMAN  | -0.0279957049 | 0.9989736 | -3.535275e-02 | 0.999995089 | 1.085491e-01  | 0.9996259 |
| DHR11-HUMAN | 0.0865036652  | 0.9989736 | 1.665821e-01  | 0.999995089 | 3.849308e-02  | 0.9996259 |
| IF1AX-HUMAN | -0.0011624531 | 0.9989736 | 1.339018e-01  | 0.999995089 | 1.113181e-01  | 0.9996259 |
| HV315-HUMAN | -0.2693063008 | 0.9989736 | 7.164462e-02  | 0.999995089 | 3.891564e-02  | 0.9996259 |
| MOT1-HUMAN  | 0.1926019682  | 0.9989736 | 1.057932e-01  | 0.999995089 | -1.293725e-01 | 0.9996259 |
| ALDR-HUMAN  | -0.1290627256 | 0.9989736 | 1.947987e-02  | 0.999995089 | -5.699039e-02 | 0.9996259 |
| RILP-HUMAN  | 0.1235759024  | 0.9989736 | 7.647033e-02  | 0.999995089 | -1.887394e-01 | 0.9996259 |
| B2MG-HUMAN  | 0.0529475455  | 0.9989736 | 3.638307e-02  | 0.999995089 | -2.244116e-01 | 0.9996259 |
| MVD1-HUMAN  | -0.0602209570 | 0.9989736 | 2.346248e-01  | 0.999995089 | 1.053244e-01  | 0.9996259 |
| OSBP2-HUMAN | 0.1147499860  | 0.9989736 | 1.464056e-02  | 0.999995089 | -1.231854e-01 | 0.9996259 |
| DHX9-HUMAN  | 0.0222305070  | 0.9989736 | -1.070604e-01 | 0.999995089 | -5.896657e-02 | 0.9996259 |
| LFA3-HUMAN  | 0.1511754299  | 0.9989736 | 1.134016e-01  | 0.999995089 | -3.917966e-03 | 0.9996259 |
| IBP2-HUMAN  | 0.1915494242  | 0.9989736 | -1.787328e-02 | 0.999995089 | -1.121868e-01 | 0.9996259 |
| NCHL1-HUMAN | -0.1248967699 | 0.9989736 | 4.369257e-02  | 0.999995089 | 1.199708e-02  | 0.9996259 |
| RAB1A-HUMAN | 0.0527766581  | 0.9989736 | 7.452567e-02  | 0.999995089 | -1.103949e-01 | 0.9996259 |
| BACH-HUMAN  | -0.0691374865 | 0.9989736 | 2.797314e-01  | 0.999995089 | -2.480477e-02 | 0.9996259 |

|             |               |           |               |             |               |           |
|-------------|---------------|-----------|---------------|-------------|---------------|-----------|
| KPRA-HUMAN  | 0.1189478240  | 0.9989736 | 3.704474e-01  | 0.999995089 | -5.633912e-02 | 0.9996259 |
| VATE1-HUMAN | -0.1568001402 | 0.9989736 | 1.421888e-01  | 0.999995089 | -1.173694e-01 | 0.9996259 |
| IBP3-HUMAN  | 0.0010238027  | 0.9989736 | 9.034998e-02  | 0.999995089 | -1.702649e-01 | 0.9996259 |
| MTNA-HUMAN  | 0.1740134923  | 0.9989736 | -4.373799e-02 | 0.999995089 | 4.100029e-02  | 0.9996259 |
| FKBP4-HUMAN | 0.1593431374  | 0.9989736 | 1.353928e-01  | 0.999995089 | -6.645491e-02 | 0.9996259 |
| MP2K1-HUMAN | -0.2363354957 | 0.9989736 | -8.256677e-02 | 0.999995089 | 5.471355e-02  | 0.9996259 |
| PPM1A-HUMAN | -0.0701574075 | 0.9989736 | 6.754338e-02  | 0.999995089 | -9.389535e-02 | 0.9996259 |
| LANC2-HUMAN | -0.0470102644 | 0.9989736 | 2.006913e-01  | 0.999995089 | 3.216407e-02  | 0.9996259 |
| S100P-HUMAN | 0.2477068567  | 0.9989736 | -4.101191e-02 | 0.999995089 | 9.411443e-02  | 0.9996259 |
| TIMP1-HUMAN | 0.1438762250  | 0.9989736 | 7.593359e-02  | 0.999995089 | 1.522023e-01  | 0.9996259 |
| RAB2A-HUMAN | -0.0365201662 | 0.9989736 | 9.683823e-02  | 0.999995089 | 1.430763e-01  | 0.9996259 |
| 2A5D-HUMAN  | 0.0925481240  | 0.9989736 | -6.384336e-03 | 0.999995089 | -8.167141e-02 | 0.9996259 |
| ICAM4-HUMAN | 0.0944470764  | 0.9989736 | 1.272332e-01  | 0.999995089 | -9.308797e-02 | 0.9996259 |
| PDLI1-HUMAN | 0.0657138068  | 0.9989736 | -5.961200e-02 | 0.999995089 | -7.615783e-03 | 0.9996259 |
| CRK-HUMAN   | 0.0834698144  | 0.9989736 | 2.286910e-01  | 0.999995089 | -2.796673e-01 | 0.9996259 |
| LSM3-HUMAN  | 0.0515452667  | 0.9989736 | -9.568222e-02 | 0.999995089 | -1.628618e-01 | 0.9996259 |
| TCTP-HUMAN  | 0.0547751769  | 0.9989736 | 8.329874e-02  | 0.999995089 | 1.188334e-01  | 0.9996259 |
| PP6R1-HUMAN | -0.0557636418 | 0.9989736 | 1.184086e-01  | 0.999995089 | 1.787149e-01  | 0.9996259 |
| DNPEP-HUMAN | -0.0951826995 | 0.9989736 | 1.618645e-02  | 0.999995089 | 3.255327e-02  | 0.9996259 |
| F1142-HUMAN | -0.0513939186 | 0.9989736 | -4.562717e-02 | 0.999995089 | 3.730068e-02  | 0.9996259 |
| ACTN4-HUMAN | -0.0312224857 | 0.9989736 | 4.191771e-02  | 0.999995089 | 1.164745e-01  | 0.9996259 |
| RTN4-HUMAN  | 0.0917152642  | 0.9989736 | 1.411591e-01  | 0.999995089 | -9.396283e-04 | 0.9996259 |
| RSSA-HUMAN  | -0.0177335275 | 0.9989736 | -6.295672e-01 | 0.004259862 | -2.898288e-01 | 0.9996259 |
| BIN2-HUMAN  | -0.0911640988 | 0.9989736 | -1.526291e-02 | 0.999995089 | 2.325153e-02  | 0.9996259 |
| 4EBP1-HUMAN | -0.0664653324 | 0.9989736 | 2.974390e-02  | 0.999995089 | -7.289958e-02 | 0.9996259 |
| BTD-HUMAN   | 0.0638531730  | 0.9989736 | 1.162821e-01  | 0.999995089 | -3.193602e-02 | 0.9996259 |
| PFD5-HUMAN  | 0.0073262586  | 0.9989736 | 3.379591e-02  | 0.999995089 | 1.076699e-01  | 0.9996259 |
| PIPNB-HUMAN | -0.0319290643 | 0.9989736 | 1.695499e-02  | 0.999995089 | 9.084731e-02  | 0.9996259 |
| SPP24-HUMAN | -0.0685200796 | 0.9989736 | -1.401528e-01 | 0.999995089 | -5.896144e-02 | 0.9996259 |
| SAA1-HUMAN  | 0.1171566270  | 0.9989736 | 3.470589e-02  | 0.999995089 | -1.545034e-01 | 0.9996259 |
| METK2-HUMAN | -0.2200045592 | 0.9989736 | -9.387050e-02 | 0.999995089 | 1.159320e-01  | 0.9996259 |
| ARP3-HUMAN  | 0.1895288110  | 0.9989736 | -3.207046e-02 | 0.999995089 | 3.883741e-02  | 0.9996259 |
| COTL1-HUMAN | -0.0706656465 | 0.9989736 | -8.296643e-02 | 0.999995089 | -1.622388e-01 | 0.9996259 |
| WNK1-HUMAN  | -0.0977531597 | 0.9989736 | 3.045441e-02  | 0.999995089 | 1.342330e-01  | 0.9996259 |
| PCOC1-HUMAN | -0.0874499627 | 0.9989736 | 1.059573e-01  | 0.999995089 | 1.385832e-01  | 0.9996259 |
| NR2CA-HUMAN | -0.1087782182 | 0.9989736 | -3.165204e-01 | 0.999995089 | -6.391563e-02 | 0.9996259 |
| GPIX-HUMAN  | 0.0477384083  | 0.9989736 | 6.072311e-02  | 0.999995089 | -1.584415e-02 | 0.9996259 |
| FKBP3-HUMAN | 0.2412522616  | 0.9989736 | 8.939687e-02  | 0.999995089 | 1.850733e-01  | 0.9996259 |
| RAB6B-HUMAN | 0.0545504445  | 0.9989736 | 1.712620e-01  | 0.999995089 | -1.513083e-01 | 0.9996259 |
| ENOPH-HUMAN | 0.0037820081  | 0.9989736 | 2.202048e-02  | 0.999995089 | 3.558130e-02  | 0.9996259 |
| ZPI-HUMAN   | -0.2534594703 | 0.9989736 | 7.164133e-02  | 0.999995089 | 1.551976e-01  | 0.9996259 |
| UBC12-HUMAN | -0.0911625385 | 0.9989736 | 5.800538e-02  | 0.999995089 | -9.105995e-02 | 0.9996259 |
| AQP1-HUMAN  | 0.1612607708  | 0.9989736 | 8.831864e-02  | 0.999995089 | -2.702774e-02 | 0.9996259 |
| QSPP-HUMAN  | -0.2035511623 | 0.9989736 | 8.996693e-02  | 0.999995089 | -1.129885e-01 | 0.9996259 |
| HV226-HUMAN | 0.0660356550  | 0.9989736 | 1.217125e-01  | 0.999995089 | -1.949042e-01 | 0.9996259 |
| AT2B1-HUMAN | 0.0120874200  | 0.9989736 | 1.511534e-02  | 0.999995089 | 2.038355e-01  | 0.9996259 |
| HXK1-HUMAN  | 0.1435171747  | 0.9989736 | -9.717581e-02 | 0.999995089 | -3.222362e-03 | 0.9996259 |
| CUL2-HUMAN  | -0.0403518040 | 0.9989736 | 9.402211e-02  | 0.999995089 | 1.083396e-02  | 0.9996259 |
| DAF-HUMAN   | 0.1937533524  | 0.9989736 | 9.202481e-02  | 0.999995089 | -7.613465e-02 | 0.9996259 |
| DEOC-HUMAN  | -0.1237668229 | 0.9989736 | 2.612271e-02  | 0.999995089 | 5.185652e-02  | 0.9996259 |
| PTBP1-HUMAN | 0.1420126438  | 0.9989736 | -7.008524e-02 | 0.999995089 | -1.220756e-01 | 0.9996259 |
| LCAT-HUMAN  | -0.0442556367 | 0.9989736 | 2.330580e-02  | 0.999995089 | -1.768059e-01 | 0.9996259 |
| PLP2-HUMAN  | 0.3639840120  | 0.9989736 | 4.583353e-02  | 0.999995089 | -4.956977e-02 | 0.9996259 |
| DIAP1-HUMAN | 0.0683658207  | 0.9989736 | -8.530447e-03 | 0.999995089 | -1.843005e-01 | 0.9996259 |
| VAC14-HUMAN | 0.1320169510  | 0.9989736 | -6.127090e-01 | 0.009080189 | -1.315031e-01 | 0.9996259 |
| SHLB2-HUMAN | -0.0293558943 | 0.9989736 | -6.964323e-02 | 0.999995089 | 1.307553e-01  | 0.9996259 |
| AT1A1-HUMAN | 0.1955126635  | 0.9989736 | 6.921941e-02  | 0.999995089 | -8.360478e-02 | 0.9996259 |
| RAB7A-HUMAN | 0.0783888440  | 0.9989736 | 9.779462e-02  | 0.999995089 | 8.654005e-02  | 0.9996259 |
| MDHM-HUMAN  | 0.1461815226  | 0.9989736 | -3.253733e-01 | 0.999995089 | -3.567551e-02 | 0.9996259 |
| DNJA4-HUMAN | 0.1681695368  | 0.9989736 | 2.257391e-02  | 0.999995089 | -1.003912e-01 | 0.9996259 |
| RAB21-HUMAN | 0.1883566143  | 0.9989736 | 1.761484e-01  | 0.999995089 | -1.557694e-01 | 0.9996259 |
| SC22B-HUMAN | 0.1337919162  | 0.9989736 | 8.198829e-02  | 0.999995089 | -8.200687e-02 | 0.9996259 |
| ENOF1-HUMAN | 0.1765788525  | 0.9989736 | 9.598961e-02  | 0.999995089 | -3.453370e-02 | 0.9996259 |
| XPP1-HUMAN  | 0.1697073015  | 0.9989736 | 3.911442e-02  | 0.999995089 | -8.358135e-02 | 0.9996259 |
| VASP-HUMAN  | 0.0230491470  | 0.9989736 | 4.765565e-02  | 0.999995089 | 2.333469e-01  | 0.9996259 |
| CNDP1-HUMAN | -0.2949487593 | 0.9989736 | -1.475077e-01 | 0.999995089 | 1.550159e-01  | 0.9996259 |
| ERF1-HUMAN  | 0.0629791233  | 0.9989736 | 8.503271e-02  | 0.999995089 | 1.881045e-01  | 0.9996259 |
| ARLY-HUMAN  | -0.1409108923 | 0.9989736 | -2.610766e-02 | 0.999995089 | 1.394219e-01  | 0.9996259 |
| COR1C-HUMAN | 0.0167018389  | 0.9989736 | -1.205614e-01 | 0.999995089 | -1.448033e-01 | 0.9996259 |
| RAB5C-HUMAN | -0.0386507171 | 0.9989736 | 5.565106e-02  | 0.999995089 | -1.213148e-01 | 0.9996259 |
| TRXR1-HUMAN | -0.0837402050 | 0.9989736 | 1.223453e-01  | 0.999995089 | -4.946083e-02 | 0.9996259 |
| IF1AY-HUMAN | -0.2899738692 | 0.9989736 | 7.537030e-02  | 0.999995089 | 7.924968e-03  | 0.9996259 |



|                         |               |           |               |             |               |           |
|-------------------------|---------------|-----------|---------------|-------------|---------------|-----------|
| FCGBP-HUMAN             | 0.2246849089  | 0.9989736 | -3.203592e-02 | 0.999995089 | -1.616010e-01 | 0.9996259 |
| NUDC1-HUMAN             | 0.0537557641  | 0.9989736 | 1.129392e-01  | 0.999995089 | 8.811785e-02  | 0.9996259 |
| AMPD3-HUMAN             | -0.2621429744 | 0.9989736 | 3.235283e-01  | 0.999995089 | 8.962348e-03  | 0.9996259 |
| RIC8A-HUMAN             | -0.1115310668 | 0.9989736 | -1.232315e-01 | 0.999995089 | -1.417281e-01 | 0.9996259 |
| AN32A-HUMAN             | 0.0303235131  | 0.9989736 | -2.798502e-01 | 0.999995089 | -2.954516e-01 | 0.9996259 |
| GNL1-HUMAN              | -0.1083378994 | 0.9989736 | -4.900727e-02 | 0.999995089 | -3.010197e-02 | 0.9996259 |
| ARC1B-HUMAN             | -0.0403397277 | 0.9989736 | -1.379098e-01 | 0.999995089 | -4.593597e-02 | 0.9996259 |
| CHM4B-HUMAN             | -0.0005280134 | 0.9989736 | -8.988566e-02 | 0.999995089 | 1.579608e-01  | 0.9996259 |
| AP4A-HUMAN              | -0.1411967756 | 0.9989736 | -3.872033e-01 | 0.999995089 | 2.246503e-01  | 0.9996259 |
| KRT82-HUMAN             | -0.0789093609 | 0.9989736 | -1.650868e-01 | 0.999995089 | -7.340474e-03 | 0.9996259 |
| GANAB-HUMAN             | 0.0053416573  | 0.9989736 | -5.347091e-02 | 0.999995089 | 7.388720e-02  | 0.9996259 |
| HEBP2-HUMAN             | 0.2124818931  | 0.9989736 | -9.596423e-02 | 0.999995089 | 1.321591e-01  | 0.9996259 |
| HNRPF-HUMAN             | 0.1528925735  | 0.9989736 | -4.883744e-02 | 0.999995089 | 1.996151e-01  | 0.9996259 |
| AAMDC-HUMAN             | -0.0855306151 | 0.9989736 | -6.688245e-02 | 0.999995089 | -1.898333e-02 | 0.9996259 |
| UBP7-HUMAN              | 0.0193930039  | 0.9989736 | 7.111007e-03  | 0.999995089 | -2.636217e-01 | 0.9996259 |
| LG3BP-HUMAN             | -0.2508554713 | 0.9989736 | 5.192815e-02  | 0.999995089 | -1.533508e-01 | 0.9996259 |
| GPV-HUMAN               | 0.0345773570  | 0.9989736 | 4.224218e-02  | 0.999995089 | -4.418621e-02 | 0.9996259 |
| CYRIB-HUMAN             | 0.2861604767  | 0.9989736 | -8.993746e-02 | 0.999995089 | -5.128116e-02 | 0.9996259 |
| GMPPA-HUMAN             | -0.2072741776 | 0.9989736 | 8.508260e-02  | 0.999995089 | 1.389211e-01  | 0.9996259 |
| FCN2-HUMAN              | -0.0034356060 | 0.9989736 | 1.103220e-01  | 0.999995089 | -2.415864e-02 | 0.9996259 |
| USP9X-HUMAN             | 0.0117811344  | 0.9989736 | 9.569830e-02  | 0.999995089 | 2.981854e-02  | 0.9996259 |
| CN37-HUMAN              | 0.2017653615  | 0.9989736 | -9.007002e-02 | 0.999995089 | 5.572207e-02  | 0.9996259 |
| PYGL-HUMAN              | 0.0906724057  | 0.9989736 | 1.213423e-01  | 0.999995089 | 1.660047e-01  | 0.9996259 |
| ILK-HUMAN               | -0.0078875814 | 0.9989736 | 4.242682e-02  | 0.999995089 | 6.894491e-02  | 0.9996259 |
| PSMG1-HUMAN             | 0.1640485312  | 0.9989736 | -1.507274e-01 | 0.999995089 | -6.575654e-02 | 0.9996259 |
| SRC8-HUMAN              | -0.0307755400 | 0.9989736 | -2.333155e-03 | 0.999995089 | 7.103988e-02  | 0.9996259 |
| HDHD2-HUMAN             | -0.0529004592 | 0.9989736 | 1.921605e-02  | 0.999995089 | -1.093515e-01 | 0.9996259 |
| CHM4A-HUMAN             | 0.0188881224  | 0.9989736 | -1.897762e-01 | 0.999995089 | -4.213041e-02 | 0.9996259 |
| ABCB6-HUMAN             | 0.2438469829  | 0.9989736 | 9.352622e-02  | 0.999995089 | -1.493172e-02 | 0.9996259 |
| TBC24-HUMAN             | -0.0028587955 | 0.9989736 | 1.787795e-01  | 0.999995089 | 2.578059e-01  | 0.9996259 |
| PARVB-HUMAN             | 0.0451951803  | 0.9989736 | -1.475554e-01 | 0.999995089 | -7.807337e-03 | 0.9996259 |
| CPPED-HUMAN             | -0.1564255521 | 0.9989736 | 1.619401e-01  | 0.999995089 | 2.673814e-01  | 0.9996259 |
| TMED2-HUMAN             | 0.2104955489  | 0.9989736 | 6.134324e-02  | 0.999995089 | -8.825121e-02 | 0.9996259 |
| FAS-HUMAN               | 0.2291978043  | 0.9989736 | 4.949474e-02  | 0.999995089 | -1.870390e-01 | 0.9996259 |
| BIP-HUMAN               | 0.2309345327  | 0.9989736 | 1.226010e-01  | 0.999995089 | -5.868886e-02 | 0.9996259 |
| ELOB-HUMAN              | -0.0673792589 | 0.9989736 | 1.318156e-01  | 0.999995089 | 1.561231e-02  | 0.9996259 |
| YKT6-HUMAN              | -0.1585289685 | 0.9989736 | -6.747366e-02 | 0.999995089 | -5.897383e-02 | 0.9996259 |
| LV460-HUMAN             | 0.0176357188  | 0.9989736 | 1.302781e-01  | 0.999995089 | -2.462352e-01 | 0.9996259 |
| ITB2-HUMAN              | 0.1871812139  | 0.9989736 | 1.400702e-01  | 0.999995089 | 1.736700e-01  | 0.9996259 |
| RADI-HUMAN              | 0.1876548070  | 0.9989736 | 3.919527e-02  | 0.999995089 | -5.318526e-02 | 0.9996259 |
| HNRPQ-HUMAN             | -0.0317788411 | 0.9989736 | 6.010705e-02  | 0.999995089 | 8.391290e-02  | 0.9996259 |
| COASY-HUMAN             | -0.0032764950 | 0.9989736 | 3.446398e-02  | 0.999995089 | -9.076076e-02 | 0.9996259 |
| PI16-HUMAN              | -0.0145961075 | 0.9989736 | -1.854867e-01 | 0.999995089 | -2.739200e-02 | 0.9996259 |
| S10AB-HUMAN             | 0.1262216569  | 0.9989736 | 1.002143e-01  | 0.999995089 | 1.279107e-01  | 0.9996259 |
| UCHL5-HUMAN             | -0.2931990013 | 0.9989736 | 6.884423e-02  | 0.999995089 | -1.008018e-01 | 0.9996259 |
| LZIC-HUMAN              | 0.1746036072  | 0.9989736 | -6.318267e-02 | 0.999995089 | 3.061350e-02  | 0.9996259 |
| HGS-HUMAN               | -0.0737092874 | 0.9989736 | -4.340728e-03 | 0.999995089 | 4.244910e-02  | 0.9996259 |
| RS12-HUMAN              | 0.0367265722  | 0.9989736 | 1.372751e-01  | 0.999995089 | 1.196276e-01  | 0.9996259 |
| TFR1-HUMAN              | -0.0038503082 | 0.9989736 | 7.765232e-02  | 0.999995089 | 2.560806e-01  | 0.9996259 |
| IF2B-HUMAN              | -0.0338381852 | 0.9989736 | -1.278805e-01 | 0.999995089 | 7.083666e-02  | 0.9996259 |
| ECP-HUMAN               | 0.1835578485  | 0.9989736 | 5.791834e-02  | 0.999995089 | 9.647962e-02  | 0.9996259 |
| PUR2-HUMAN              | -0.1698283590 | 0.9989736 | 7.113397e-02  | 0.999995089 | -2.135256e-01 | 0.9996259 |
| MASP2-HUMAN             | 0.0956707065  | 0.9989736 | -1.488345e-01 | 0.999995089 | -8.911628e-02 | 0.9996259 |
| LYAM1-HUMAN             | -0.1057187559 | 0.9989736 | -8.206520e-02 | 0.999995089 | -2.393744e-01 | 0.9996259 |
| MOB1B-HUMAN;MOB1A-HUMAN | -0.0863316782 | 0.9989736 | -5.970032e-03 | 0.999995089 | 6.580101e-02  | 0.9996259 |
| CLIC2-HUMAN             | 0.1692956301  | 0.9989736 | -1.134938e-01 | 0.999995089 | 3.714657e-03  | 0.9996259 |
| SIAS-HUMAN              | -0.1699803982 | 0.9989736 | 3.577281e-02  | 0.999995089 | -5.549497e-02 | 0.9996259 |
| PRG4-HUMAN              | -0.0779327796 | 0.9989736 | -9.706713e-02 | 0.999995089 | 2.408113e-02  | 0.9996259 |
| ADK-HUMAN               | -0.1668533349 | 0.9989736 | 6.335138e-02  | 0.999995089 | -1.015789e-01 | 0.9996259 |
| TNPO1-HUMAN             | 0.0324724143  | 0.9989736 | 4.493331e-02  | 0.999995089 | -1.020260e-01 | 0.9996259 |
| ADPRS-HUMAN             | 0.1161968613  | 0.9989736 | -2.381806e-01 | 0.999995089 | -2.065970e-01 | 0.9996259 |
| CADH5-HUMAN             | 0.0290598169  | 0.9989736 | 9.687026e-03  | 0.999995089 | -1.349932e-01 | 0.9996259 |
| COMP-HUMAN              | 0.0532857147  | 0.9989736 | -5.673322e-02 | 0.999995089 | 1.095480e-01  | 0.9996259 |
| KVD29-HUMAN;KV229-HUMAN | -0.0402327519 | 0.9989736 | 5.424961e-02  | 0.999995089 | -4.987567e-02 | 0.9996259 |
| ACOC-HUMAN              | -0.1244342292 | 0.9989736 | 1.881623e-01  | 0.999995089 | -1.322435e-01 | 0.9996259 |
| CRIS3-HUMAN             | -0.0174370851 | 0.9989736 | 1.384125e-01  | 0.999995089 | 4.552491e-03  | 0.9996259 |
| LEG10-HUMAN             | 0.0241245179  | 0.9989736 | 1.483239e-01  | 0.999995089 | 3.465732e-02  | 0.9996259 |
| GPX4-HUMAN              | 0.0020455326  | 0.9989736 | 1.256240e-01  | 0.999995089 | -1.679465e-02 | 0.9996259 |
| UBP47-HUMAN             | -0.2003825205 | 0.9989736 | 6.594747e-02  | 0.999995089 | 1.367546e-01  | 0.9996259 |
| DCTN1-HUMAN             | -0.1537019151 | 0.9989736 | 5.602703e-02  | 0.999995089 | -1.973472e-01 | 0.9996259 |
| CPNE1-HUMAN             | 0.0187658601  | 0.9989736 | 2.131372e-02  | 0.999995089 | 1.905760e-02  | 0.9996259 |
| PCYOX-HUMAN             | 0.2199580413  | 0.9989736 | -1.361308e-01 | 0.999995089 | -5.876011e-02 | 0.9996259 |

|                         |               |           |               |             |               |           |
|-------------------------|---------------|-----------|---------------|-------------|---------------|-----------|
| IBP5-HUMAN              | -0.0314981994 | 0.9989736 | -2.161481e-02 | 0.999995089 | 1.243975e-01  | 0.9996259 |
| RAB14-HUMAN             | 0.0295119873  | 0.9989736 | 1.723558e-01  | 0.999995089 | 4.128475e-02  | 0.9996259 |
| JAM1-HUMAN              | 0.1934086624  | 0.9989736 | 7.002137e-02  | 0.999995089 | 4.538368e-02  | 0.9996259 |
| TBCB-HUMAN              | 0.0487297771  | 0.9989736 | 8.175743e-03  | 0.999995089 | 3.254364e-01  | 0.9996259 |
| ERP44-HUMAN             | 0.1854669210  | 0.9989736 | 6.627701e-02  | 0.999995089 | 9.328249e-02  | 0.9996259 |
| SRGN-HUMAN              | -0.0561057662 | 0.9989736 | 5.984456e-02  | 0.999995089 | 3.947752e-03  | 0.9996259 |
| CALD1-HUMAN             | 0.1418136258  | 0.9989736 | -1.283767e-03 | 0.999995089 | 2.302051e-02  | 0.9996259 |
| PLS1-HUMAN              | 0.2164417679  | 0.9989736 | 6.431046e-02  | 0.999995089 | -4.224341e-02 | 0.9996259 |
| KS6A3-HUMAN             | -0.0309620855 | 0.9989736 | 9.810425e-02  | 0.999995089 | 1.268090e-01  | 0.9996259 |
| EZRI-HUMAN              | -0.1177370311 | 0.9989736 | 1.187107e-01  | 0.999995089 | -7.552687e-02 | 0.9996259 |
| LV746-HUMAN             | -0.0990504935 | 0.9989736 | -4.708869e-02 | 0.999995089 | 2.045623e-01  | 0.9996259 |
| KCMF1-HUMAN             | -0.1793863669 | 0.9989736 | 6.198912e-02  | 0.999995089 | -1.096834e-01 | 0.9996259 |
| QORX-HUMAN              | -0.1978872895 | 0.9989736 | 9.708079e-02  | 0.999995089 | -1.131799e-01 | 0.9996259 |
| PTRD1-HUMAN             | -0.0299497956 | 0.9989736 | 1.083766e-01  | 0.999995089 | -1.239948e-01 | 0.9996259 |
| AT2A3-HUMAN             | 0.0966802362  | 0.9989736 | 3.850315e-02  | 0.999995089 | -7.270978e-02 | 0.9996259 |
| LAT4-HUMAN              | -0.0170942666 | 0.9989736 | 1.164658e-01  | 0.999995089 | 8.793110e-05  | 0.9996259 |
| SYCC-HUMAN              | -0.0652639846 | 0.9989736 | 7.557365e-02  | 0.999995089 | 4.669420e-02  | 0.9996259 |
| LV316-HUMAN             | -0.0991005328 | 0.9989736 | -1.626443e-02 | 0.999995089 | 8.053392e-02  | 0.9996259 |
| GTR3-HUMAN;GTR14-HUMAN  | 0.0877238575  | 0.9989736 | 4.503724e-02  | 0.999995089 | -1.001030e-01 | 0.9996259 |
| KVD21-HUMAN             | -0.0339690019 | 0.9989736 | 1.481383e-02  | 0.999995089 | 3.011249e-02  | 0.9996259 |
| ELOC-HUMAN              | -0.1830246452 | 0.9989736 | 5.776713e-02  | 0.999995089 | 1.354321e-01  | 0.9996259 |
| PEF1-HUMAN              | -0.1159697515 | 0.9989736 | 1.478815e-01  | 0.999995089 | -5.598580e-02 | 0.9996259 |
| RNAS1-HUMAN             | 0.2425835542  | 0.9989736 | 1.835302e-02  | 0.999995089 | -2.547885e-01 | 0.9996259 |
| ATG4A-HUMAN             | -0.1629796610 | 0.9989736 | 1.156850e-01  | 0.999995089 | 1.812015e-01  | 0.9996259 |
| LYVE1-HUMAN             | 0.2621285230  | 0.9989736 | -1.025330e-01 | 0.999995089 | -9.019282e-02 | 0.9996259 |
| MPCP-HUMAN              | 0.2159226648  | 0.9989736 | 7.748281e-02  | 0.999995089 | -6.252730e-02 | 0.9996259 |
| IGE-HUMAN               | -0.1265475871 | 0.9989736 | 1.172185e-01  | 0.999995089 | 1.765501e-01  | 0.9996259 |
| ASAP1-HUMAN             | 0.0165944416  | 0.9989736 | -1.102340e-01 | 0.999995089 | -6.513740e-02 | 0.9996259 |
| GNAI2-HUMAN             | 0.2349948007  | 0.9989736 | 8.591072e-02  | 0.999995089 | -1.067407e-02 | 0.9996259 |
| SCFD1-HUMAN             | -0.0271432297 | 0.9989736 | 5.466023e-02  | 0.999995089 | 1.479758e-03  | 0.9996259 |
| CLIC4-HUMAN             | 0.0045722354  | 0.9989736 | 5.714921e-02  | 0.999995089 | -3.641648e-02 | 0.9996259 |
| TSNAX-HUMAN             | 0.0323067779  | 0.9989736 | 2.669598e-02  | 0.999995089 | 1.788846e-01  | 0.9996259 |
| GGEE3-HUMAN;PAGE2-HUMAN | 0.0039235363  | 0.9989736 | 9.864570e-02  | 0.999995089 | 8.649681e-03  | 0.9996259 |
| GLGB-HUMAN              | -0.2401043846 | 0.9989736 | -2.269575e-01 | 0.999995089 | 1.653650e-02  | 0.9996259 |
| DENR-HUMAN              | -0.0488427335 | 0.9989736 | 5.413944e-03  | 0.999995089 | 5.133815e-02  | 0.9996259 |
| PGRP1-HUMAN             | 0.1527082876  | 0.9989736 | -1.515367e-02 | 0.999995089 | 8.066284e-02  | 0.9996259 |
| SELO-HUMAN              | 0.0890315975  | 0.9989736 | 1.772391e-01  | 0.999995089 | -1.845640e-02 | 0.9996259 |
| CD99-HUMAN              | -0.0164636620 | 0.9989736 | 3.191129e-02  | 0.999995089 | -6.231336e-02 | 0.9996259 |
| VAMP2-HUMAN;VAMP3-HUMAN | 0.1982129187  | 0.9989736 | 8.931167e-02  | 0.999995089 | 1.042729e-01  | 0.9996259 |
| PSMD8-HUMAN             | 0.0646284594  | 0.9989736 | 1.286712e-01  | 0.999995089 | -9.887279e-02 | 0.9996259 |
| CH10-HUMAN              | -0.2914779323 | 0.9989736 | 3.678177e-02  | 0.999995089 | -9.476413e-02 | 0.9996259 |
| WIPI1-HUMAN             | 0.0172861552  | 0.9989736 | 2.221396e-01  | 0.999995089 | -6.804736e-02 | 0.9996259 |
| ANXA4-HUMAN             | 0.2290321408  | 0.9989736 | -7.733365e-02 | 0.999995089 | -1.321021e-01 | 0.9996259 |
| HMGN2-HUMAN             | 0.2167476849  | 0.9989736 | 5.150920e-03  | 0.999995089 | 3.789472e-02  | 0.9996259 |
| AMPB-HUMAN              | -0.1154836328 | 0.9989736 | -4.595829e-02 | 0.999995089 | -6.556765e-02 | 0.9996259 |
| LTBP1-HUMAN             | -0.1649671865 | 0.9989736 | 3.988965e-02  | 0.999995089 | 1.029086e-01  | 0.9996259 |
| EF1G-HUMAN              | 0.0882214123  | 0.9989736 | -2.611378e-01 | 0.999995089 | 1.833552e-01  | 0.9996259 |
| GLU2B-HUMAN             | 0.1580516858  | 0.9989736 | 6.963346e-02  | 0.999995089 | -6.396850e-03 | 0.9996259 |
| HMGB2-HUMAN             | 0.1458826705  | 0.9989736 | -1.084573e-01 | 0.999995089 | 1.605359e-01  | 0.9996259 |
| EF1D-HUMAN              | 0.1348794551  | 0.9989736 | 4.589012e-02  | 0.999995089 | -2.796048e-02 | 0.9996259 |
| CALR-HUMAN              | 0.2107491466  | 0.9989736 | 6.391054e-02  | 0.999995089 | -5.295799e-02 | 0.9996259 |
| CATD-HUMAN              | 0.1642723892  | 0.9989736 | 1.348146e-01  | 0.999995089 | -2.219261e-02 | 0.9996259 |
| MMRN1-HUMAN             | -0.1917905021 | 0.9989736 | -1.333479e-01 | 0.999995089 | 1.885730e-02  | 0.9996259 |
| CSRP1-HUMAN             | 0.1310710317  | 0.9989736 | 1.057193e-01  | 0.999995089 | 3.465253e-01  | 0.9996259 |
| ERF3A-HUMAN             | 0.1226765305  | 0.9989736 | -1.021194e-02 | 0.999995089 | 1.975713e-01  | 0.9996259 |
| PEBP4-HUMAN             | 0.0462635278  | 0.9989736 | -2.068997e-01 | 0.999995089 | -1.508082e-01 | 0.9996259 |
| GNAI3-HUMAN             | 0.2478810458  | 0.9989736 | 1.240438e-01  | 0.999995089 | 4.532656e-02  | 0.9996259 |
| UBA3-HUMAN              | 0.0789263262  | 0.9989736 | 4.519161e-02  | 0.999995089 | 8.612760e-02  | 0.9996259 |
| TBG1-HUMAN;TBG2-HUMAN   | -0.0954760980 | 0.9989736 | 1.092022e-01  | 0.999995089 | 2.762061e-01  | 0.9996259 |
| VTA1-HUMAN              | -0.0405629316 | 0.9989736 | 6.435326e-02  | 0.999995089 | 2.786423e-01  | 0.9996259 |
| K1H1-HUMAN              | -0.0607581662 | 0.9989736 | 6.066211e-02  | 0.999995089 | 3.682216e-02  | 0.9996259 |
| RS17-HUMAN              | 0.0854521008  | 0.9989736 | -6.022799e-02 | 0.999995089 | -1.938867e-01 | 0.9996259 |
| BCAM-HUMAN              | 0.1968226979  | 0.9989736 | 8.282528e-02  | 0.999995089 | -4.411820e-03 | 0.9996259 |
| YBOX3-HUMAN             | 0.1598017238  | 0.9989736 | 5.748986e-02  | 0.999995089 | 4.384931e-02  | 0.9996259 |
| ISG15-HUMAN             | -0.2732433684 | 0.9989736 | -3.272069e-02 | 0.999995089 | -2.115367e-01 | 0.9996259 |
| LV548-HUMAN             | 0.1822015708  | 0.9989736 | 3.090367e-02  | 0.999995089 | 1.025879e-01  | 0.9996259 |
| NNRE-HUMAN              | -0.1743887420 | 0.9989736 | -1.610954e-02 | 0.999995089 | -1.061631e-01 | 0.9996259 |
| DPYL2-HUMAN             | -0.1068731797 | 0.9989736 | 1.041002e-01  | 0.999995089 | 9.472106e-02  | 0.9996259 |
| BASP1-HUMAN             | 0.0443269378  | 0.9989736 | 1.553986e-02  | 0.999995089 | 4.318928e-02  | 0.9996259 |
| XRP2-HUMAN              | 0.1883966700  | 0.9989736 | 8.730048e-02  | 0.999995089 | 4.815476e-02  | 0.9996259 |
| DOPO-HUMAN              | 0.1389203510  | 0.9989736 | 1.203336e-01  | 0.999995089 | 4.417609e-02  | 0.9996259 |
| MBL2-HUMAN              | 0.2232757424  | 0.9989736 | -3.265113e-02 | 0.999995089 | -2.209481e-03 | 0.9996259 |

|                         |               |           |               |             |               |           |
|-------------------------|---------------|-----------|---------------|-------------|---------------|-----------|
| PURA-HUMAN              | -0.0165319780 | 0.9989736 | 6.238054e-02  | 0.999995089 | -1.074078e-02 | 0.9996259 |
| RHAG-HUMAN              | 0.2716338597  | 0.9989736 | 7.537770e-02  | 0.999995089 | -7.880204e-02 | 0.9996259 |
| PSMG2-HUMAN             | 0.0621758005  | 0.9989736 | -2.701606e-02 | 0.999995089 | -1.271364e-01 | 0.9996259 |
| VP26B-HUMAN             | 0.1495647937  | 0.9989736 | 2.662458e-02  | 0.999995089 | 2.904430e-01  | 0.9996259 |
| SAA2-HUMAN              | 0.0310877604  | 0.9989736 | 3.467825e-02  | 0.999995089 | -1.353062e-01 | 0.9996259 |
| DNJA2-HUMAN             | 0.0858404164  | 0.9989736 | 1.798985e-01  | 0.999995089 | 1.044955e-01  | 0.9996259 |
| GLPA-HUMAN              | 0.3114296968  | 0.9989736 | 1.043603e-01  | 0.999995089 | -7.939369e-02 | 0.9996259 |
| PIGR-HUMAN              | -0.0058653259 | 0.9989736 | 8.215337e-02  | 0.999995089 | 8.298623e-02  | 0.9996259 |
| LMAN2-HUMAN             | 0.2403941270  | 0.9989736 | 1.204324e-01  | 0.999995089 | -5.352440e-02 | 0.9996259 |
| HCLS1-HUMAN             | -0.1528473382 | 0.9989736 | 3.256105e-02  | 0.999995089 | -8.584154e-02 | 0.9996259 |
| ANGI-HUMAN              | -0.0062739459 | 0.9989736 | 1.013512e-01  | 0.999995089 | 1.972173e-01  | 0.9996259 |
| SPRC-HUMAN              | -0.2002254613 | 0.9989736 | -1.560490e-01 | 0.999995089 | 1.042987e-01  | 0.9996259 |
| RAB2B-HUMAN             | 0.0352598605  | 0.9989736 | -1.817598e-01 | 0.999995089 | 1.350852e-01  | 0.9996259 |
| MP2K3-HUMAN             | 0.0225338004  | 0.9989736 | 1.754803e-02  | 0.999995089 | -2.015027e-02 | 0.9996259 |
| MP2K2-HUMAN             | -0.0935705818 | 0.9989736 | 2.627934e-02  | 0.999995089 | -8.802831e-03 | 0.9996259 |
| LA-HUMAN                | -0.1473199122 | 0.9989736 | -4.062340e-02 | 0.999995089 | -1.658145e-01 | 0.9996259 |
| CSN7A-HUMAN             | -0.0748183444 | 0.9989736 | -1.145704e-01 | 0.999995089 | 3.127560e-01  | 0.9996259 |
| NRBP-HUMAN              | 0.0238795255  | 0.9989736 | 1.089986e-01  | 0.999995089 | -1.948698e-02 | 0.9996259 |
| HLAA-HUMAN              | 0.0142284702  | 0.9989736 | 2.242993e-03  | 0.999995089 | -9.135095e-02 | 0.9996259 |
| PDCD5-HUMAN             | -0.0893820138 | 0.9989736 | -2.447046e-03 | 0.999995089 | -1.245579e-01 | 0.9996259 |
| CY24B-HUMAN             | 0.1327820995  | 0.9989736 | 4.265482e-02  | 0.999995089 | 3.645900e-02  | 0.9996259 |
| CD36-HUMAN              | 0.2169069550  | 0.9989736 | 9.727706e-02  | 0.999995089 | -1.786121e-01 | 0.9996259 |
| SERC-HUMAN              | 0.1016468524  | 0.9989736 | 6.504150e-02  | 0.999995089 | -1.517501e-01 | 0.9996259 |
| AHNK-HUMAN              | 0.1129490283  | 0.9989736 | 3.817329e-02  | 0.999995089 | -1.193623e-01 | 0.9996259 |
| LAMP2-HUMAN             | -0.0223827753 | 0.9989736 | 1.033819e-02  | 0.999995089 | -1.476102e-01 | 0.9996259 |
| IDHP-HUMAN              | 0.1685506904  | 0.9989736 | 5.489637e-02  | 0.999995089 | -1.500179e-02 | 0.9996259 |
| FCN1-HUMAN              | -0.1568211996 | 0.9989736 | 1.697477e-02  | 0.999995089 | 2.136869e-01  | 0.9996259 |
| PDIA4-HUMAN             | -0.2391621836 | 0.9989736 | 4.247440e-02  | 0.999995089 | 2.261087e-01  | 0.9996259 |
| FHL1-HUMAN              | -0.1027662914 | 0.9989736 | 1.127430e-01  | 0.999995089 | -8.655303e-02 | 0.9996259 |
| CALX-HUMAN              | 0.2266291327  | 0.9989736 | 8.746010e-02  | 0.999995089 | -4.451167e-04 | 0.9996259 |
| NEUG-HUMAN              | -0.0086551694 | 0.9989736 | 4.477483e-02  | 0.999995089 | -1.289699e-01 | 0.9996259 |
| ITAM-HUMAN              | 0.2709998695  | 0.9989736 | 9.326719e-02  | 0.999995089 | -1.816554e-01 | 0.9996259 |
| VNN1-HUMAN              | 0.1769738165  | 0.9989736 | 6.215860e-02  | 0.999995089 | 2.423206e-01  | 0.9996259 |
| THAS-HUMAN              | 0.2724763025  | 0.9989736 | 1.477089e-02  | 0.999995089 | -3.492742e-02 | 0.9996259 |
| ROA1-HUMAN              | -0.2108495549 | 0.9989736 | 3.629587e-02  | 0.999995089 | 8.062061e-02  | 0.9996259 |
| HUWE1-HUMAN             | -0.0370504608 | 0.9989736 | 1.473840e-01  | 0.999995089 | -2.172585e-02 | 0.9996259 |
| PGTB2-HUMAN             | 0.1479010578  | 0.9989736 | 7.250238e-02  | 0.999995089 | 8.386496e-02  | 0.9996259 |
| YBOX1-HUMAN             | 0.2144246215  | 0.9989736 | 1.318756e-01  | 0.999995089 | 4.542685e-02  | 0.9996259 |
| PIEZ1-HUMAN             | 0.3356095176  | 0.9989736 | 6.768638e-02  | 0.999995089 | -5.787886e-02 | 0.9996259 |
| SEM7A-HUMAN             | 0.1805401197  | 0.9989736 | 6.773981e-02  | 0.999995089 | 9.955259e-02  | 0.9996259 |
| RIR1-HUMAN              | 0.0421374653  | 0.9989736 | 9.224670e-02  | 0.999995089 | -2.046260e-03 | 0.9996259 |
| SAC1-HUMAN              | 0.2178854120  | 0.9989736 | 8.047380e-02  | 0.999995089 | -1.982473e-02 | 0.9996259 |
| LVX54-HUMAN             | -0.0691355862 | 0.9989736 | 8.329463e-02  | 0.999995089 | 6.890862e-02  | 0.9996259 |
| PPP5-HUMAN              | -0.0017815689 | 0.9989736 | 4.507898e-02  | 0.999995089 | -1.255675e-01 | 0.9996259 |
| ADRM1-HUMAN             | -0.1930007484 | 0.9989736 | 1.609017e-01  | 0.999995089 | -1.119559e-01 | 0.9996259 |
| PLPL6-HUMAN             | 0.1287830135  | 0.9989736 | 1.599842e-01  | 0.999995089 | -9.590286e-02 | 0.9996259 |
| SNP23-HUMAN             | 0.1310264281  | 0.9989736 | 9.588027e-02  | 0.999995089 | -7.637653e-03 | 0.9996259 |
| CH60-HUMAN              | 0.1542973157  | 0.9989736 | 1.589386e-01  | 0.999995089 | -4.253337e-02 | 0.9996259 |
| IGBP1-HUMAN             | -0.2588241390 | 0.9989736 | 5.125426e-03  | 0.999995089 | 2.748331e-02  | 0.9996259 |
| DCA11-HUMAN             | -0.2854022817 | 0.9989736 | 2.640017e-02  | 0.999995089 | 1.284914e-01  | 0.9996259 |
| GGH-HUMAN               | 0.0150260248  | 0.9989736 | 5.276965e-02  | 0.999995089 | 3.893966e-02  | 0.9996259 |
| HV320-HUMAN             | -0.2268891097 | 0.9989736 | 8.539793e-02  | 0.999995089 | -1.316700e-01 | 0.9996259 |
| PCNP-HUMAN              | -0.1341619995 | 0.9989736 | -1.831652e-01 | 0.999995089 | -1.959454e-02 | 0.9996259 |
| H2AZ-HUMAN;H2AV-HUMAN   | 0.2392798514  | 0.9989736 | -5.405643e-02 | 0.999995089 | -5.511276e-02 | 0.9996259 |
| TXND5-HUMAN             | 0.1527557347  | 0.9989736 | 1.072098e-01  | 0.999995089 | -1.706080e-01 | 0.9996259 |
| AL5AP-HUMAN             | 0.2201979589  | 0.9989736 | 8.158809e-02  | 0.999995089 | 7.373255e-02  | 0.9996259 |
| GNAS2-HUMAN;GNAS1-HUMAN | 0.0955255084  | 0.9989736 | 6.925039e-02  | 0.999995089 | 4.750269e-02  | 0.9996259 |
| COIA1-HUMAN             | 0.1270157324  | 0.9989736 | -5.994184e-03 | 0.999995089 | -1.748687e-01 | 0.9996259 |
| ROA2-HUMAN              | 0.0634830310  | 0.9989736 | -9.446694e-03 | 0.999995089 | -1.125358e-01 | 0.9996259 |
| TTC38-HUMAN             | 0.0993387266  | 0.9989736 | -1.708411e-01 | 0.999995089 | 3.056128e-02  | 0.9996259 |
| COL11-HUMAN             | 0.0952389401  | 0.9989736 | 9.843781e-02  | 0.999995089 | 7.026841e-02  | 0.9996259 |
| ACSL3-HUMAN             | 0.1183046677  | 0.9989736 | 3.536430e-02  | 0.999995089 | -5.824975e-02 | 0.9996259 |
| PROZ-HUMAN              | -0.0781592053 | 0.9989736 | 8.543720e-02  | 0.999995089 | 6.107802e-03  | 0.9996259 |
| CAN5-HUMAN              | 0.2826064946  | 0.9989736 | 7.463883e-02  | 0.999995089 | -4.091469e-02 | 0.9996259 |
| PPP6-HUMAN              | -0.0051221760 | 0.9989736 | 1.394499e-01  | 0.999995089 | 6.552468e-02  | 0.9996259 |
| LV545-HUMAN;LV539-HUMAN | -0.1335808650 | 0.9989736 | -6.299719e-02 | 0.999995089 | -2.062188e-01 | 0.9996259 |
| S29A1-HUMAN             | 0.1348422888  | 0.9989736 | 7.674533e-02  | 0.999995089 | 4.323509e-02  | 0.9996259 |
| KT33A-HUMAN             | 0.0485449158  | 0.9989736 | -2.790125e-02 | 0.999995089 | -2.590749e-02 | 0.9996259 |
| LAMP1-HUMAN             | 0.2312388450  | 0.9989736 | 6.607707e-02  | 0.999995089 | -5.686266e-03 | 0.9996259 |
| VAPA-HUMAN              | 0.2214393664  | 0.9989736 | 9.198882e-02  | 0.999995089 | -5.117454e-02 | 0.9996259 |
| CAD13-HUMAN             | -0.0959692893 | 0.9989736 | 9.067702e-02  | 0.999995089 | 6.270166e-02  | 0.9996259 |
| FCERG-HUMAN             | 0.2786475173  | 0.9989736 | 2.758506e-02  | 0.999995089 | -1.713656e-03 | 0.9996259 |

|                         |               |           |               |             |               |           |
|-------------------------|---------------|-----------|---------------|-------------|---------------|-----------|
| PTMA-HUMAN              | -0.1430391087 | 0.9989736 | -6.128354e-02 | 0.999995089 | -3.883949e-02 | 0.9996259 |
| PLBL1-HUMAN             | 0.2230561121  | 0.9989736 | 1.382785e-02  | 0.999995089 | 1.459168e-01  | 0.9996259 |
| S43A3-HUMAN             | 0.1104148678  | 0.9989736 | 1.025085e-01  | 0.999995089 | -1.686480e-01 | 0.9996259 |
| CR1-HUMAN               | 0.3807418089  | 0.9989736 | 7.813553e-02  | 0.999995089 | 3.310308e-02  | 0.9996259 |
| S40A1-HUMAN             | 0.0679039952  | 0.9989736 | 9.787802e-02  | 0.999995089 | 3.210506e-02  | 0.9996259 |
| MYG-HUMAN               | -0.1304367611 | 0.9989736 | 2.766888e-02  | 0.999995089 | -1.450738e-01 | 0.9996259 |
| MRP4-HUMAN              | 0.2331969383  | 0.9989736 | 9.117534e-02  | 0.999995089 | -7.221998e-02 | 0.9996259 |
| ARI2-HUMAN              | 0.0144611870  | 0.9989736 | 1.159903e-01  | 0.999995089 | 6.385985e-02  | 0.9996259 |
| SNX3-HUMAN              | -0.0806137280 | 0.9989736 | 1.547805e-01  | 0.999995089 | 1.410932e-02  | 0.9996259 |
| CIAO1-HUMAN             | -0.2084979694 | 0.9989736 | -1.078381e-02 | 0.999995089 | -1.012312e-01 | 0.9996259 |
| EFHD2-HUMAN;EFHD1-HUMAN | 0.0830932263  | 0.9989736 | -1.154971e-02 | 0.999995089 | 2.081526e-01  | 0.9996259 |
| RL7-HUMAN               | -0.1024206149 | 0.9989736 | 1.729018e-01  | 0.999995089 | -4.952705e-02 | 0.9996259 |
| MYH10-HUMAN             | -0.4399007099 | 0.9989736 | 3.335942e-02  | 0.999995089 | -1.487024e-02 | 0.9996259 |
| REEP5-HUMAN             | 0.1296477171  | 0.9989736 | 8.467021e-02  | 0.999995089 | -3.904027e-02 | 0.9996259 |
| K1C9-HUMAN              | 0.0144722593  | 0.9989736 | 7.463472e-02  | 0.999995089 | 9.659844e-02  | 0.9996259 |
| COX41-HUMAN             | 0.1916220486  | 0.9989736 | 3.999787e-02  | 0.999995089 | -4.513613e-02 | 0.9996259 |
| KRT35-HUMAN             | 0.0381756511  | 0.9989736 | 2.555867e-02  | 0.999995089 | -2.477071e-02 | 0.9996259 |
| ISK5-HUMAN              | 0.0097115834  | 0.9989736 | 3.530132e-03  | 0.999995089 | -2.019665e-01 | 0.9996259 |
| C2C2L-HUMAN             | 0.2728681986  | 0.9989736 | 8.584932e-02  | 0.999995089 | -3.931872e-02 | 0.9996259 |
| TPM2-HUMAN              | 0.0976672061  | 0.9989736 | 7.903851e-02  | 0.999995089 | 3.468784e-02  | 0.9996259 |
| K22E-HUMAN              | -0.0234629163 | 0.9989736 | 6.339199e-02  | 0.999995089 | -5.031756e-02 | 0.9996259 |
| ITB1-HUMAN              | 0.0381953722  | 0.9989736 | 7.458553e-02  | 0.999995089 | -9.034012e-02 | 0.9996259 |
| KR111-HUMAN             | -0.0528853027 | 0.9989736 | -1.557037e-01 | 0.999995089 | 1.013963e-02  | 0.9996259 |
| MPU1-HUMAN              | 0.3684074025  | 0.9989736 | 6.075785e-02  | 0.999995089 | -7.159056e-02 | 0.9996259 |
| COX2-HUMAN              | 0.1955098625  | 0.9989736 | 8.444590e-02  | 0.999995089 | -6.853380e-02 | 0.9996259 |
| IGHD-HUMAN              | -0.1380776579 | 0.9989736 | 1.314595e-02  | 0.999995089 | -7.851834e-02 | 0.9996259 |
| UTER-HUMAN              | 0.0733373418  | 0.9989736 | 4.234770e-02  | 0.999995089 | -2.609737e-01 | 0.9996259 |
| GUAA-HUMAN              | -0.2536638122 | 0.9989736 | 6.708942e-02  | 0.999995089 | 5.130506e-02  | 0.9996259 |
| WFDC2-HUMAN             | -0.0429579459 | 0.9989736 | 8.989891e-02  | 0.999995089 | 7.296579e-02  | 0.9996259 |
| AR6P1-HUMAN             | 0.3495816886  | 0.9989736 | 7.652060e-02  | 0.999995089 | -7.559020e-02 | 0.9996259 |
| SBSN-HUMAN              | 0.2809149398  | 0.9989736 | 4.368258e-02  | 0.999995089 | 1.003791e-02  | 0.9996259 |
| CD177-HUMAN             | -0.0022914280 | 0.9989736 | 3.069727e-02  | 0.999995089 | -5.864914e-02 | 0.9996259 |
| RDH11-HUMAN             | 0.0730182254  | 0.9989736 | 6.587838e-02  | 0.999995089 | -5.291100e-02 | 0.9996259 |
