# Supplementary material for: Systemic Blood Proteome Patterns Reflect Disease Phenotypes in Neovascular Age-Related Macular Degeneration
Source: MDPI journal article supplement (doi:10.3390/ijms241210327), 2023-06-19
Supplement: s1 [file s1]

3 Suppl. Table S6\_AllProtDichotomousFeatures

|                    | Sex           | Sex                   | Sex                                           | IVI cohort    | IVI cohort            | IVI cohort                                    | IRC            | IRC                                 | IRC                                                         | SHRM          | SHRM                                  |
|--------------------|---------------|-----------------------|-----------------------------------------------|---------------|-----------------------|-----------------------------------------------|----------------|-------------------------------------|-------------------------------------------------------------|---------------|---------------------------------------|
| .                  | AVG.Log.Ratio | p-val. (2-sided test) | Adj. p-val. (2-sided test, Benjamini-H. cor.) | AVG.Log.Ratio | p-val. (2-sided test) | Adj. p-val. (2-sided test, Benjamini-H. cor.) | AVG.Log.Ratio  | p-val. (1-sided test, IRC > no IRC) | Adj. p-val. (1-sided test, IRC > no IRC, Benjamini-H. cor.) | AVG.Log.Ratio | p-val. (1-sided test, SHRM > no SHRM) |
| IGLV4-69           | 0.0790085304  | 7.693066e-01          | 9.192799e-01                                  | -0.2824281423 | 0.301230598           | 0.9995992                                     | 7.091512e-02   | 0.397760115                         | 0.9546035                                                   | -0.0822763018 | 6.174771e-01                          |
| IGLV6-61           | -0.0952694116 | 6.221051e-01          | 8.419469e-01                                  | 0.0414402407  | 0.822928548           | 0.9995992                                     | 2.024022e-01   | 0.152843309                         | 0.9546035                                                   | 0.1478094643  | 2.037104e-01                          |
| IGLV4-60           | 0.2829770179  | 5.208075e-01          | 8.216873e-01                                  | -0.1325837252 | 0.776402052           | 0.9995992                                     | 6.866525e-01   | 0.072997623                         | 0.9546035                                                   | 0.3227181031  | 2.349314e-01                          |
| IGLV10-54          | 1.0234427076  | 1.352664e-02          | 3.121263e-01                                  | 0.0717843907  | 0.859070833           | 0.9995992                                     | -6.207483e-02  | 0.561187788                         | 0.9546035                                                   | 0.0243068254  | 4.751315e-01                          |
| IGLV5-48           | -0.3697934244 | 5.532319e-01          | 8.319594e-01                                  | -0.4055677153 | 0.543920820           | 0.9995992                                     | 3.564972e-01   | 0.288301864                         | 0.9546035                                                   | -0.4766405123 | 7.455476e-01                          |
| IGLV7-46           | 0.3115380616  | 4.241351e-01          | 7.973735e-01                                  | 0.1080793053  | 0.785607527           | 0.9995992                                     | 5.427747e-01   | 0.083363995                         | 0.9546035                                                   | -0.0912982834 | 5.887866e-01                          |
| IGLV2-18           | 0.9016328830  | 2.424313e-01          | 6.725635e-01                                  | -1.1001381903 | 0.184688565           | 0.9995992                                     | 4.222029e-01   | 0.301211531                         | 0.9546035                                                   | -1.3081950007 | 9.291181e-01                          |
| IGLV3-16           | 0.0400478603  | 9.153877e-01          | 9.738869e-01                                  | 0.0981619768  | 0.798119616           | 0.9995992                                     | -3.946941e-01  | 0.853708002                         | 0.9572213                                                   | 0.0561730446  | 4.430390e-01                          |
| IGLV3-10           | -0.0050324401 | 9.799778e-01          | 9.936282e-01                                  | -0.1063329973 | 0.603843818           | 0.9995992                                     | 4.346350e-02   | 0.413436216                         | 0.9546035                                                   | 0.0682103437  | 3.767967e-01                          |
| IGLV3-9            | 0.1998184882  | 3.522500e-01          | 7.498135e-01                                  | -0.2053741316 | 0.346513530           | 0.9995992                                     | -3.187268e-01  | 0.929440842                         | 0.9662261                                                   | -0.2423435022 | 8.531431e-01                          |
| IGKV2-28jIGKV2-28  | -0.0604973942 | 7.225903e-01          | 8.841633e-01                                  | 0.1538666972  | 0.367972408           | 0.9995992                                     | 2.810768e-01   | 0.050969380                         | 0.9546035                                                   | 0.1215600383  | 2.408785e-01                          |
| IGHV3-64           | 0.0143344389  | 9.399950e-01          | 9.832514e-01                                  | -0.0465801539 | 0.810826997           | 0.9995992                                     | 1.972611e-01   | 0.155224720                         | 0.9546035                                                   | 0.1236242118  | 2.651522e-01                          |
| IGHV4-4            | -0.0179651940 | 9.204669e-01          | 9.747769e-01                                  | -0.1616726611 | 0.367468149           | 0.9995992                                     | 5.126769e-01   | 0.001736276                         | 0.6382854                                                   | -0.1471588666 | 7.868350e-01                          |
| IGKV2-24jIGKV2-24  | 0.1270665005  | 5.096110e-01          | 8.151018e-01                                  | -0.0848247740 | 0.668580499           | 0.9995992                                     | 1.132718e-01   | 0.278440535                         | 0.9546035                                                   | -0.0125451157 | 5.239381e-01                          |
| IGKV2-29jIGKV2-29  | 0.0694084396  | 9.082921e-01          | 9.715849e-01                                  | -0.9679595974 | 0.141144371           | 0.9995992                                     | -1.618918e-03  | 0.501066265                         | 0.9546035                                                   | -0.7290570641 | 8.513186e-01                          |
| IGKV1-37jIGKV1-37  | 1.5518676232  | 8.195747e-03          | 2.618209e-01                                  | 0.8320635804  | 0.117809153           | 0.9995992                                     | -9.106876e-01  | 0.944014956                         | 0.9707604                                                   | -0.3526140152 | 7.259083e-01                          |
| IGLV5-45jGLV5-39   | 0.0496025978  | 9.005940e-01          | 9.710488e-01                                  | 0.3639016853  | 0.354952184           | 0.9995992                                     | 9.826827e-02   | 0.406138824                         | 0.9546035                                                   | 0.2548387561  | 2.595756e-01                          |
| IGHV4-30-2         | -0.2037168999 | 4.035071e-01          | 7.844497e-01                                  | -0.2313179157 | 0.354338448           | 0.9995992                                     | -9.403719e-02  | 0.648165682                         | 0.9546035                                                   | -0.1253745641 | 6.898302e-01                          |
| IGKV30-15          | -0.3422413634 | 4.464571e-01          | 8.021362e-01                                  | 0.5016350578  | 0.241128886           | 0.9995992                                     | 2.348802e-01   | 0.306398562                         | 0.9546035                                                   | 0.4325826861  | 1.472050e-01                          |
| IGKV10-8           | 0.1601427234  | 6.023532e-01          | 8.419469e-01                                  | -0.1728211778 | 0.563729423           | 0.9995992                                     | -5.017869e-04  | 0.500631828                         | 0.9546035                                                   | 0.0460412236  | 4.390065e-01                          |
| IGKV2-40jIGKV2-40  | 0.0425271515  | 8.909348e-01          | 9.687085e-01                                  | 0.0839923464  | 0.790966041           | 0.9995992                                     | -1.136757e-01  | 0.641860993                         | 0.9546035                                                   | -0.4361561604 | 8.967896e-01                          |
| IGKV2-11jIGKV2-11  | -0.4786929805 | 2.211251e-02          | 3.455296e-01                                  | 0.1907631703  | 0.366556633           | 0.9995992                                     | 1.563967e-01   | 0.232243274                         | 0.9546035                                                   | 0.1651035892  | 2.174023e-01                          |
| IGHV1-45           | 0.4258925985  | 2.206340e-01          | 6.697766e-01                                  | -0.3604567895 | 0.320907516           | 0.9995992                                     | 0.507984e-01   | 0.078149681                         | 0.9546035                                                   | 0.0978306529  | 3.866036e-01                          |
| IGHV3-49           | 0.2955061312  | 2.199662e-01          | 6.697766e-01                                  | 0.0224854597  | 0.927036723           | 0.9995992                                     | -5.652955e-02  | 0.592479537                         | 0.9546035                                                   | -0.0991356916 | 6.440897e-01                          |
| IGHV2-21           | -0.9451779711 | 3.405569e-01          | 7.413228e-01                                  | -0.9671939299 | 0.359825551           | 0.9995992                                     | -9.408146e-01  | 0.827012536                         | 0.9572213                                                   | -0.9275566639 | 7.973715e-01                          |
| IGKV1-31           | 0.3664531939  | 1.442419e-01          | 6.111415e-01                                  | -0.4264632836 | 0.096468388           | 0.9995992                                     | 2.272651e-01   | 0.190184843                         | 0.9546035                                                   | -0.2271062611 | 0.609451e-01                          |
| IGLV1-36           | 0.1396139348  | 6.938892e-01          | 8.060792e-01                                  | -0.3866030316 | 0.276609419           | 0.9995992                                     | -8.672373e-02  | 0.593798204                         | 0.9546035                                                   | -0.2239450757 | 7.340370e-01                          |
| IGHV6-1            | 0.4745664911  | 2.147198e-01          | 6.680462e-01                                  | 0.1059722806  | 0.790101369           | 0.9995992                                     | 7.020142e-02   | 0.428532133                         | 0.9546035                                                   | 0.5298318397  | 6.459685e-02                          |
| IGHV3-15           | 0.1831268929  | 6.142640e-01          | 8.419469e-01                                  | -0.4435254319 | 0.252211792           | 0.9995992                                     | -4.685096e-01  | 0.895898794                         | 0.9579808                                                   | -0.6286768786 | 9.390066e-01                          |
| IGHV2-26           | -0.1387680198 | 6.291334e-01          | 8.431244e-01                                  | 0.1423490982  | 0.611114827           | 0.9995992                                     | 1.241414e-01   | 0.336805370                         | 0.9546035                                                   | -0.2862788530 | 8.347524e-01                          |
| IGHV3-73           | -0.0002163686 | 9.990571e-01          | 9.990571e-01                                  | 0.0424508357  | 0.814942918           | 0.9995992                                     | -4.800526e-02  | 0.601736084                         | 0.9546035                                                   | -0.0002293606 | 5.005145e-01                          |
| IGHV3-74           | -0.2171599605 | 5.349300e-01          | 8.281031e-01                                  | 0.2276806785  | 0.488553318           | 0.9995992                                     | 1.687701e-01   | 0.313375647                         | 0.9546035                                                   | 0.1780785102  | 2.887483e-01                          |
| IGHV3-43           | -0.0507224986 | 8.241126e-01          | 4.929827e-01                                  | 0.0623823074  | 0.775486192           | 0.9995992                                     | -0.103974e-01  | 0.785653549                         | 0.9572213                                                   | 0.0483005341  | 1.437681e-01                          |
| IGLV9-49           | -0.2500868889 | 7.448934e-01          | 9.009472e-01                                  | -0.3083044813 | 0.704923072           | 0.9995992                                     | -4.706451e-01  | 0.728000016                         | 0.9546035                                                   | -0.2976800390 | 6.320609e-01                          |
| IGHV3-72           | 0.2309817882  | 2.847421e-01          | 6.987920e-01                                  | 0.0321307060  | 0.862603259           | 0.9995992                                     | 3.018219e-02   | 0.445806403                         | 0.9546035                                                   | 0.2525871901  | 2.108836e-01                          |
| IGKV10-13jIGKV1-13 | 0.1113295051  | 5.386365e-01          | 8.281031e-01                                  | 0.1302157263  | 0.481411022           | 0.9995992                                     | 1.038226e-01   | 0.286843233                         | 0.9546035                                                   | -0.0365817558 | 5.870572e-01                          |
| IGKV6-21           | -0.0555137106 | 8.488941e-01          | 9.510832e-01                                  | -0.6992009378 | 0.021871712           | 0.9995992                                     | -1.946407e-01  | 0.744088331                         | 0.9546035                                                   | -0.6013039775 | 9.705988e-01                          |
| IGKV30-20          | -0.4113971901 | 1.013194e-01          | 5.314990e-01                                  | -0.0139637173 | 0.958204564           | 0.9995992                                     | 2.338126e-01   | 0.182059576                         | 0.9546035                                                   | -0.1625917242 | 7.166960e-01                          |
| IGHV1-18           | 0.2116047217  | 3.286030e-01          | 7.272974e-01                                  | -0.3177005487 | 0.149114412           | 0.9995992                                     | -3.473422e-01  | 0.948585652                         | 0.9707604                                                   | -0.2304982510 | 8.448769e-01                          |
| IGHV3-10           | 0.5841938289  | 1.335294e-01          | 5.889243e-01                                  | -0.5514232330 | 0.167660057           | 0.9995992                                     | -0.395962e-02  | 0.533652231                         | 0.9546035                                                   | -0.3639783345 | 8.109760e-01                          |
| IGHV1-24           | -0.075575449  | 7.699552e-01          | 9.192799e-01                                  | 0.0021639708  | 0.993438452           | 0.9995992                                     | -1.678909e-01  | 0.765085645                         | 0.9572213                                                   | -0.0659458846 | 5.980243e-01                          |
| IGHV4-28           | 0.2356666735  | 2.944828e-01          | 7.010683e-01                                  | 0.0766926971  | 0.733791528           | 0.9995992                                     | -0.1003974e-01 | 0.668942755                         | 0.9546035                                                   | 0.0740800945  | 3.715164e-01                          |
| IGHV3-35           | -0.0068252428 | 9.727048e-01          | 9.926294e-01                                  | 0.0543506971  | 0.784583035           | 0.9995992                                     | 0.1015308e-01  | 0.299496591                         | 0.9546035                                                   | 0.0284576421  | 4.477185e-01                          |
| IGHV3-38           | 0.3772482390  | 9.352128e-02          | 5.196358e-01                                  | 0.1127568067  | 0.621456331           | 0.9995992                                     | 1.048485e-01   | 0.327350954                         | 0.9546035                                                   | 0.1978813863  | 1.901383e-01                          |
| IGHV5-51           | -0.1661371442 | 4.175242e-01          | 7.924897e-01                                  | -0.0284865760 | 0.889686855           | 0.9995992                                     | 4.053416e-01   | 0.024770749                         | 0.9546035                                                   | 0.1478833890  | 2.374772e-01                          |
| IGHV2-70D          | -0.1500767331 | 6.716634e-01          | 8.576613e-01                                  | -0.4720493171 | 0.173635414           | 0.9995992                                     | -4.836932e-02  | 0.552782241                         | 0.9546035                                                   | -0.3542626763 | 8.460546e-01                          |
| IGKV1-8            | 0.1127158215  | 3.723527e-01          | 7.647336e-01                                  | 0.0173583270  | 0.891263422           | 0.9995992                                     | 6.673238e-02   | 0.303202647                         | 0.9546035                                                   | 0.0475937670  | 3.546776e-01                          |
| IGKV1-12jIGKV1D-12 | -0.0723684703 | 6.703722e-01          | 8.576613e-01                                  | -0.0670597597 | 0.692246832           | 0.9995992                                     | 5.268635e-02   | 0.380587302                         | 0.9546035                                                   | 0.0519888537  | 7.365993e-01                          |
| IGHV3-64D          | 0.4071183401  | 4.065198e-01          | 7.860114e-01                                  | 0.5801135566  | 0.210681963           | 0.9995992                                     | -4.192016e-01  | 0.804854618                         | 0.9572213                                                   | 0.4469542255  | 5.142326e-01                          |
| IGHV5-10-1         | -0.7814644556 | 2.244962e-02          | 3.455296e-01                                  | 0.6510868449  | 0.058316172           | 0.9995992                                     | 9.156627e-01   | 0.003300702                         | 0.6502383                                                   | 0.5348446110  | 6.153219e-02                          |
| IGLV7              | 0.2623500451  | 6.157109e-02          | 4.562264e-01                                  | 0.0958364619  | 0.503174496           | 0.9995992                                     | -2.782388e-02  | 0.576882138                         | 0.9546035                                                   | 0.1895920469  | 7.448991e-02                          |
| PGP                | -0.0709120376 | 5.318064e-01          | 8.281031e-01                                  | -0.0885532248 | 0.433999549           | 0.9995992                                     | 0.166621e-02   | 0.463276434                         | 0.9546035                                                   | -0.0551137863 | 6.841390e-01                          |
| IGLV22P2-ANXA2     | 0.0075163606  | 9.769090e-01          | 9.926889e-01                                  | 0.0912037001  | 0.728020877           | 0.9995992                                     | -8.582050e-02  | 0.827222338                         | 0.9546035                                                   | -0.0233910713 | 5.373852e-01                          |
| SMIM1              | -0.2933879350 | 5.865272e-01          | 8.419469e-01                                  | 0.0334404986  | 0.950365243           | 0.9995992                                     | -5.714844e-02  | 0.542126339                         | 0.9546035                                                   | 0.5049867136  | 1.768077e-01                          |
| PDLM1              | -0.2428268436 | 5.403544e-02          | 4.562264e-01                                  | -0.1078766391 | 0.407922681           | 0.9995992                                     | -2.756597e-04  | 0.500834440                         | 0.9546035                                                   | -0.0601755268 | 6.753728e-01                          |
| ACOT7              | 0.2030734847  | 1.357873e-01          | 5.932126e-01                                  | -0.1147902408 | 0.406789356           | 0.9995992                                     | 9.478158e-02   | 0.235700599                         | 0.9546035                                                   | -0.0892634994 | 7.319992e-01                          |
| SNAP23             | -0.2937139209 | 2.673130e-01          | 6.940168e-01                                  | -0.2321691713 | 0.394773153           | 0.9995992                                     | 2.153947e-02   | 0.467493948                         | 0.9546035                                                   | 0.00559978016 | 4.918603e-01                          |
| MASP2              | -0.1776924445 | 5.059664e-01          | 8.151018e-01                                  | 0.1939679537  | 0.446407346           | 0.9995992                                     | -6.596714e-02  | 0.597387934                         | 0.9546035                                                   | -0.3610637783 | 8.929400e-01                          |
| PSMD11             | 0.0919280284  | 2.353006e-01          | 6.697766e-01                                  | -0.1305248475 | 0.098954315           | 0.9995992                                     | 1.192964e-01   | 0.066381503                         | 0.9546035                                                   | 0.0139860690  | 4.311342e-01                          |
| PSMD12             | -0.0744433021 | 5.580986e-01          | 8.319734e-01                                  | -0.2150317746 | 0.091945132           | 0.9995992                                     | 3.811843e-03   | 0.488267994                         | 0.9546035                                                   | -0.1447429238 | 8.761842e-01                          |
| PSMD9              | -0.2626133440 | 2.559060e-02          | 3.556993e-01                                  | 0.0834150546  | 0.483106804           | 0.9995992                                     | 6.673930e-02   | 0.291092514                         | 0.9546035                                                   | 0.1652398429  | 8.883239e-02                          |
| CLIC1              | 0.0953232339  | 3.758352e-02          | 4.562264e-01                                  | 0.0398044382  | 0.425372896           | 0.9995992                                     | 2.420479e-02   | 0.321381924                         | 0.9546035                                                   | 0.0316718764  |                                       |



|                    |          |               |              |               |  |               |             |           |  |               |             |  |           |  |               |              |
|--------------------|----------|---------------|--------------|---------------|--|---------------|-------------|-----------|--|---------------|-------------|--|-----------|--|---------------|--------------|
| KRT33A             |          | -1.1433708720 | 1.833525e-01 | 6.356609e-01  |  | -1.1006366224 | 0.224434791 | 0.9995992 |  | -1.081206e+00 | 0.894277613 |  | 0.9579808 |  | -0.9476069350 | 8.382922e-01 |
| SEC14L2            |          | 0.0850617192  | 5.336491e-01 | 8.2810317e-01 |  | -0.2308352036 | 0.087399780 | 0.9995992 |  | -4.631779e-02 | 0.628729826 |  | 0.9546035 |  | -0.1133430373 | 8.096751e-01 |
| C1A01              |          | -0.7487243330 | 1.084545e-01 | 5.408542e-01  |  | 0.1325553320  | 0.753639682 | 0.9995992 |  | -8.547535e-01 | 0.965727542 |  | 0.9774190 |  | -0.1180478926 | 6.041798e-01 |
| ENOD01             |          | -0.4715176275 | 2.026974e-01 | 6.646753e-01  |  | 0.0169527037  | 0.962973570 | 0.9995992 |  | -1.267284e-01 | 0.634052734 |  | 0.9546035 |  | 0.2859290211  | 1.285194e-01 |
| RTN3               |          | 2.3073732788  | 8.736584e-02 | 5.137633e-01  |  | 1.7203460394  | 0.159722806 | 0.9995992 |  | -1.064167e+00 | 0.820199238 |  | 0.9572213 |  | 1.4824341577  | 1.019169e-01 |
| PGLS               |          | -0.0406305023 | 5.929075e-01 | 8.419469e-01  |  | 0.0495185509  | 0.521369533 | 0.9995992 |  | 4.606659e-02  | 0.273857783 |  | 0.9546035 |  | 0.1085970066  | 8.405946e-02 |
| IPO7               |          | -0.0867561125 | 2.479042e-01 | 6.760373e-01  |  | 0.0470969797  | 0.586193983 | 0.9995992 |  | 1.196060e-02  | 0.443890491 |  | 0.9546035 |  | -0.0464106655 | 7.015071e-01 |
| ARIH2              |          | 0.2949197986  | 5.604852e-02 | 4.562264e-01  |  | 0.0110866787  | 0.942718418 | 0.9995992 |  | 7.874035e-02  | 0.310667407 |  | 0.9546035 |  | 0.2293863915  | 7.351390e-02 |
| APOM               |          | -0.1304783456 | 4.069704e-01 | 7.860114e-01  |  | 0.2154962296  | 0.155973982 | 0.9995992 |  | 1.404382e-01  | 0.193304391 |  | 0.9546035 |  | 0.0816744805  | 2.919976e-01 |
| PSMG1              | 1,00 VNN | 0.0282104411  | 8.963614e-01 | 9.687085e-01  |  | 0.0223565236  | 0.918638735 | 0.9995992 |  | -1.870024e-01 | 0.815560167 |  | 0.9572213 |  | -0.2947785127 | 9.087450e-01 |
|                    |          | -0.1321368527 | 7.205828e-01 | 8.833575e-01  |  | 0.2208990684  | 0.547073612 | 0.9995992 |  | 3.874643e-01  | 0.148197848 |  | 0.9546035 |  | 0.4336633238  | 1.232386e-01 |
| ACSL3              |          | 0.0076841483  | 9.879681e-01 | 9.952791e-01  |  | -0.2682650329 | 0.608234777 | 0.9995992 |  | -5.772724e-01 | 0.866954151 |  | 0.9572213 |  | -0.0376711027 | 5.281334e-01 |
| OXSR1              |          | 0.0718070076  | 4.747706e-01 | 8.125882e-01  |  | 0.1031837400  | 0.308290487 | 0.9995992 |  | 1.169729e-01  | 0.120111599 |  | 0.9546035 |  | 0.1592576091  | 5.846198e-02 |
| AP2A1              |          | 0.0482597164  | 6.258512e-01 | 8.423236e-01  |  | -0.0776702972 | 0.438879487 | 0.9995992 |  | 1.924169e-02  | 0.421802131 |  | 0.9546035 |  | -0.0730901425 | 7.679425e-01 |
| CAVIN2             |          | -0.1050284298 | 4.136819e-01 | 7.920435e-01  |  | -0.0051818092 | 0.966911511 | 0.9995992 |  | -2.289842e-01 | 0.962033236 |  | 0.9774190 |  | -0.0654036466 | 6.935547e-01 |
| BPN11              |          | 0.1195139876  | 5.549600e-01 | 8.319734e-01  |  | 0.1930936747  | 0.336890404 | 0.9995992 |  | -2.285934e-01 | 0.873730604 |  | 0.9572213 |  | 0.0945959360  | 3.162057e-01 |
| CYBSA              |          | -0.0763834656 | 5.192517e-01 | 8.216271e-01  |  | 0.0469802339  | 0.704252330 | 0.9995992 |  | -9.763896e-02 | 0.796172101 |  | 0.9572213 |  | -0.0563599575 | 6.676341e-01 |
| LDHA               |          | 0.0519200192  | 4.227864e-01 | 7.970233e-01  |  | 0.0431195332  | 0.502350096 | 0.9995992 |  | 2.200615e-02  | 0.370613290 |  | 0.9546035 |  | 0.0621725778  | 1.729669e-01 |
| ALDH1A1            |          | 1.1205430218  | 4.356613e-01 | 8.021362e-01  |  | 0.0357316049  | 0.823067875 | 0.9995992 |  | -0.074740e-02 | 0.676013197 |  | 0.9546035 |  | 0.0022673426  | 4.948097e-01 |
| CYBSR3             |          | -0.1424528663 | 4.632861e-01 | 8.069339e-01  |  | 0.0385504358  | 0.842657925 | 0.9995992 |  | 1.919228e-01  | 0.164221531 |  | 0.9546035 |  | 0.2696020700  | 8.218252e-02 |
| GSR                |          | 0.0813784896  | 3.637597e-01 | 7.553917e-01  |  | 0.0173333408  | 0.852418296 | 0.9995992 |  | 1.072044e-01  | 0.119626935 |  | 0.9546035 |  | 0.2013823400  | 1.141735e-02 |
| MT-CO2             |          | -1.1004590716 | 1.745139e-01 | 6.291668e-01  |  | -0.3796998835 | 0.631815905 | 0.9995992 |  | -1.345402e-01 | 0.568798924 |  | 0.9546035 |  | 0.4199024093  | 3.047907e-01 |
| SOD1               |          | 0.2248252813  | 8.954930e-04 | 1.319384e-01  |  | 0.0782701507  | 0.265274023 | 0.9995992 |  | -1.339806e-03 | 0.507318436 |  | 0.9546035 |  | 0.1108078828  | 5.571723e-02 |
| CP                 |          | -0.1473609919 | 2.088433e-01 | 6.658594e-01  |  | -0.0919085683 | 0.437025199 | 0.9995992 |  | -3.266919e-02 | 0.606977601 |  | 0.9546035 |  | -0.2755680459 | 9.855639e-01 |
| F13A1              |          | -0.2108855853 | 1.610679e-02 | 3.187282e-01  |  | -0.0324379576 | 0.721506134 | 0.9995992 |  | -2.017422e-02 | 0.588649794 |  | 0.9546035 |  | -0.1008038949 | 8.621350e-01 |
| PNP                |          | 0.0890344455  | 2.413337e-01 | 6.725639e-01  |  | 0.0687023442  | 0.370472798 | 0.9995992 |  | 9.555609e-02  | 0.102509323 |  | 0.9546035 |  | 0.1039533386  | 9.451544e-02 |
| HPRT1              |          | 0.0502193746  | 4.545832e-01 | 8.045226e-01  |  | 0.0072062627  | 0.917539460 | 0.9995992 |  | -3.304995e-02 | 0.685487560 |  | 0.9546035 |  | 0.0670558795  | 1.718331e-01 |
|                    | 1,00 PGK | 0.0928348678  | 7.355340e-02 | 4.803322e-01  |  | 0.0406506300  | 0.443528832 | 0.9995992 |  | 1.089531e-02  | 0.419349202 |  | 0.9546035 |  | 0.1005855484  | 3.298995e-02 |
| AK1                |          | -0.0505636265 | 6.645861e-01 | 8.576613e-01  |  | 0.0666350727  | 0.568943901 | 0.9995992 |  | -5.464389e-02 | 0.675653384 |  | 0.9546035 |  | 0.1770521986  | 6.212604e-02 |
| F2                 |          | -0.0740216557 | 4.223806e-01 | 7.970233e-01  |  | 0.1338833088  | 0.165773969 | 0.9995992 |  | 3.665274e-02  | 0.550855082 |  | 0.9546035 |  | 0.0568649391  | 2.680326e-01 |
| C1R                |          | -0.1333539675 | 1.676239e-01 | 6.287166e-01  |  | -0.1056771955 | 0.278061946 | 0.9995992 |  | 8.306808e-03  | 0.466902099 |  | 0.9546035 |  | -0.2175402847 | 9.867066e-01 |
| HP                 |          | 0.4063158882  | 6.364420e-02 | 4.597775e-01  |  | -0.0058124639 | 0.978639488 | 0.9995992 |  | 1.441944e-01  | 0.259750352 |  | 0.9546035 |  | -0.0955462694 | 6.578970e-01 |
| HPR                |          | -0.1866178269 | 3.773427e-01 | 7.647330e-01  |  | -0.2009496314 | 0.342320051 | 0.9995992 |  | 1.166150e-01  | 0.297265931 |  | 0.9546035 |  | -0.0509712136 | 5.935741e-01 |
| F9                 |          | 0.0940089134  | 5.476926e-01 | 8.281031e-01  |  | 0.0340969259  | 0.830944976 | 0.9995992 |  | 4.527861e-01  | 0.001793009 |  | 0.6382854 |  | -0.0448422341 | 6.069523e-01 |
| F10                |          | -0.1068402489 | 0.416672e-01 | 7.845341e-01  |  | 0.0557322871  | 0.662911353 | 0.9995992 |  | 3.143534e-02  | 0.403357755 |  | 0.9546035 |  | -0.1322105888 | 6.534064e-01 |
| CFD                |          | 0.3613883469  | 5.064062e-01 | 8.510180e-01  |  | 0.4729258137  | 0.355088495 | 0.9995992 |  | -5.230035e-01 | 0.831503155 |  | 0.9572213 |  | -0.6585682025 | 8.506717e-01 |
| PLG                |          | -0.137925790  | 1.231230e-01 | 5.729582e-01  |  | 0.1105713036  | 0.222637019 | 0.9995992 |  | 5.135366e-02  | 0.289020256 |  | 0.9546035 |  | -0.0581948808 | 7.438352e-01 |
| F12                |          | -0.1372337559 | 2.149762e-01 | 6.680462e-01  |  | -0.0946702582 | 0.404588102 | 0.9995992 |  | -1.633020e-01 | 0.925256055 |  | 0.9644203 |  | -0.1419733377 | 8.921652e-01 |
| CFB                |          | 0.0393870268  | 6.824806e-01 | 8.636041e-01  |  | -0.0995082664 | 0.299797315 | 0.9995992 |  | -5.716735e-02 | 0.719623959 |  | 0.9546035 |  | -0.1740882309 | 9.588730e-01 |
| CA1                |          | 0.2202910804  | 2.232461e-03 | 1.319384e-01  |  | 0.0115212357  | 0.877609826 | 0.9995992 |  | 2.906778e-02  | 0.352001097 |  | 0.9546035 |  | 0.0538933709  | 2.415502e-01 |
| CA2                |          | 0.1592037197  | 5.781317e-02 | 4.562264e-01  |  | -0.0205026821 | 0.812623275 | 0.9995992 |  | 3.909498e-02  | 0.327404839 |  | 0.9546035 |  | 0.1109632676  | 1.110635e-01 |
| SERPINC1           |          | -0.1056107505 | 1.886815e-01 | 6.427328e-01  |  | 0.0056431894  | 0.843004974 | 0.9995992 |  | 5.052278e-02  | 0.271689436 |  | 0.9546035 |  | -0.0468074282 | 7.328513e-01 |
| SERPINA1           |          | 0.1180720006  | 1.805392e-01 | 6.347267e-01  |  | -0.0397143092 | 0.655831726 | 0.9995992 |  | -1.040058e-01 | 0.875428256 |  | 0.9572213 |  | -0.0860951945 | 8.251346e-01 |
| SERPINA3           |          | -0.0841638775 | 4.698593e-01 | 8.121938e-01  |  | 0.0566287955  | 0.626343967 | 0.9995992 |  | -7.157724e-02 | 0.624191445 |  | 0.9546035 |  | -0.0289140679 | 5.965931e-01 |
| AGT                |          | -0.2342520774 | 8.795135e-02 | 5.146460e-01  |  | 0.1481362542  | 0.272225135 | 0.9995992 |  | 2.600134e-01  | 0.030450348 |  | 0.9546035 |  | 0.0871309990  | 2.635643e-01 |
| A2M                |          | -0.0976583130 | 5.057729e-01 | 8.510180e-01  |  | -0.1121123810 | 0.439975684 | 0.9995992 |  | 1.468895e-01  | 0.163140573 |  | 0.9546035 |  | 0.0415894066  | 3.832176e-01 |
| C3                 |          | -0.2199484092 | 2.492554e-02 | 3.507394e-01  |  | -0.0910922449 | 0.366416477 | 0.9995992 |  | -2.032249e-03 | 0.508466860 |  | 0.9546035 |  | -0.1605590788 | 9.438459e-01 |
| C5                 |          | -0.0774399392 | 4.262466e-01 | 7.973739e-01  |  | -0.0634310258 | 0.506202345 | 0.9995992 |  | -5.873996e-02 | 0.723492297 |  | 0.9546035 |  | -0.1358283894 | 9.215856e-01 |
| TMPI1              |          | 0.00210604382 | 8.832344e-01 | 9.666510e-01  |  | -0.0123452433 | 0.931040595 | 0.9995992 |  | -3.273149e-01 | 0.989869915 |  | 0.9816649 |  | -0.2826101016 | 6.686338e-01 |
| CS73               |          | 0.0989296274  | 7.394959e-01 | 8.976831e-01  |  | 0.2829295286  | 0.318486335 | 0.9995992 |  | -3.730051e-01 | 0.996630008 |  | 0.9579808 |  | -0.3853283310 | 8.692971e-01 |
| KN01               |          | -0.0698610768 | 3.291913e-01 | 7.272974e-01  |  | -0.0118006884 | 0.904229212 | 0.9995992 |  | -3.153861e-02 | 0.620881590 |  | 0.9546035 |  | -0.0976725363 | 8.315723e-01 |
| KRAS               |          | -0.0938303662 | 6.196170e-01 | 8.419469e-01  |  | -0.0687805191 | 0.720746031 | 0.9995992 |  | -5.309504e-02 | 0.609765500 |  | 0.9546035 |  | 0.1177978285  | 2.755575e-01 |
| IGF2               |          | -0.1869685369 | 1.764673e-01 | 6.320739e-01  |  | 0.0234477522  | 0.843425923 | 0.9995992 |  | -8.389946e-02 | 0.742757548 |  | 0.9546035 |  | -0.2397472017 | 9.759899e-01 |
| JCHAIN             |          | 0.0755490472  | 7.534903e-01 | 9.072100e-01  |  | -0.0122909061 | 0.960393231 | 0.9995992 |  | 2.145708e-01  | 0.192306055 |  | 0.9546035 |  | -0.1412612406 | 7.078046e-01 |
| IGKV1D-33;IGKV1-33 |          | -0.0510109585 | 8.173018e-01 | 9.406531e-01  |  | -0.0536682787 | 0.808022548 | 0.9995992 |  | 5.526782e-01  | 0.400170376 |  | 0.9546035 |  | -0.1602256610 | 7.580964e-01 |
| IGKV1-39;IGKV1D-39 |          | -0.0080352499 | 9.566079e-01 | 9.907192e-01  |  | -0.1437881692 | 0.333863177 | 0.9995992 |  | 2.218353e-01  | 0.068514225 |  | 0.9546035 |  | 0.0827776184  | 2.890957e-01 |
| IGKV1-17           |          | -0.2083202906 | 2.285325e-01 | 6.697768e-01  |  | 0.0482104370  | 0.778973694 | 0.9995992 |  | 1.219011e-01  | 0.247365877 |  | 0.9546035 |  | 0.0282810000  | 4.354931e-01 |
| IGKV1D-16          |          | -0.1423893837 | 5.405784e-01 | 8.281031e-01  |  | 0.2364178908  | 0.304685293 | 0.9995992 |  | 8.023422e-02  | 0.362577653 |  | 0.9546035 |  | 0.5650157064  | 7.487950e-03 |
| IGKV1-5            |          | 0.7           |              |               |  |               |             |           |  |               |             |  |           |  |               |              |

|                         |               |              |              |               |             |           |               |             |           |               |              |
|-------------------------|---------------|--------------|--------------|---------------|-------------|-----------|---------------|-------------|-----------|---------------|--------------|
| IGLV7-43                | 0.1992754241  | 3.137463e-01 | 7.197712e-01 | 0.1452901641  | 0.465110219 | 0.9995992 | 3.921394e-02  | 0.422252806 | 0.9546035 | 0.1052650597  | 2.986314e-01 |
| A1BG                    | -0.0494782458 | 6.102293e-01 | 8.419469e-01 | -0.0641291603 | 0.516551947 | 0.9995992 | -4.490545e-02 | 0.675418995 | 0.9546035 | -0.0759872728 | 7.769688e-01 |
| VWF                     | 0.0290776885  | 8.901807e-01 | 9.687085e-01 | -0.3894991602 | 0.066106332 | 0.9995992 | -1.322782e-01 | 0.732236618 | 0.9546035 | -0.3360186116 | 8.340555e-01 |
| SHBG                    | -0.4726247962 | 1.572656e-01 | 6.224838e-01 | -0.6573485195 | 0.064269298 | 0.9995992 | -6.344963e-02 | 0.968536797 | 0.9774190 | -0.5702048633 | 9.364297e-01 |
| GAPDH                   | 0.0321011316  | 5.734286e-01 | 8.344560e-01 | -0.0113524856 | 0.839075630 | 0.9995992 | -1.479399e-02 | 0.599670254 | 0.9546035 | -0.0064749852 | 5.469767e-01 |
| ASL                     | -0.0457988431 | 6.270183e-01 | 8.423236e-01 | 0.0617396715  | 1.502282118 | 0.9995992 | 8.044471e-02  | 0.201767853 | 0.9546035 | 0.0881363482  | 1.693631e-01 |
| IGKV1-16                | 0.0539472818  | 7.965238e-01 | 9.305665e-01 | -0.0707399425 | 0.749591758 | 0.9995992 | -3.032152e-01 | 0.924798295 | 0.9644203 | -0.2158235438 | 8.182447e-01 |
| HLA-A                   | -0.6164053161 | 9.852429e-02 | 5.314990e-01 | -0.1290942400 | 0.721973957 | 0.9995992 | -0.121359e-02 | 0.576232463 | 0.9546035 | -0.0390363095 | 5.431770e-01 |
| CAPNS1                  | 0.0795917066  | 2.600748e-01 | 6.900429e-01 | -0.0174084444 | 0.803584722 | 0.9995992 | 8.169504e-02  | 0.130507056 | 0.9546035 | 0.0476963819  | 2.404474e-01 |
| HSPB1                   | 0.1927060846  | 6.157195e-01 | 8.419469e-01 | 0.3253511394  | 0.380668674 | 0.9995992 | -9.340590e-02 | 0.959584063 | 0.9546035 | -0.2444017461 | 7.122315e-01 |
| CYBB                    | -0.4520546215 | 1.294345e-01 | 5.795137e-01 | -0.0642695033 | 0.827516227 | 0.9995992 | -1.714822e-01 | 0.715265879 | 0.9546035 | 0.2190293298  | 2.355706e-01 |
| GNAI2                   | -0.5007065503 | 2.004181e-01 | 6.617157e-01 | -0.2320262731 | 0.554003452 | 0.9995992 | -2.381496e-01 | 0.727812801 | 0.9546035 | 0.0625124700  | 4.381073e-01 |
| GYPC                    | -0.1939925300 | 7.385492e-01 | 8.976831e-01 | 0.1564506286  | 0.745091749 | 0.9995992 | -3.243893e-01 | 0.745586676 | 0.9546035 | 0.4839273977  | 1.542532e-01 |
| ATP1A1                  | 0.5136801953  | 6.076422e-01 | 8.419469e-01 | 1.1650308142  | 0.264554320 | 0.9995992 | -1.690079e+00 | 0.038627447 | 0.9681131 | 0.6244650131  | 2.695602e-01 |
| ARG1                    | -0.1331988362 | 4.605543e-01 | 8.069339e-01 | 0.0077140750  | 0.967720049 | 0.9995992 | 6.582955e-02  | 0.360282222 | 0.9546035 | 0.0231113512  | 4.490813e-01 |
| APOD                    | 0.0918048497  | 4.622548e-01 | 8.069339e-01 | -0.0381019677 | 0.784294142 | 0.9995992 | 0.069542e-02  | 0.319466721 | 0.9546035 | 0.0359261887  | 3.791542e-01 |
| ITGB3                   | -0.6596410160 | 5.801728e-02 | 4.562264e-01 | -0.0352863081 | 0.918954486 | 0.9995992 | -2.781979e-03 | 0.503170287 | 0.9546035 | 0.1921160863  | 2.921322e-01 |
| ITGB2                   | -0.1426819573 | 6.777783e-01 | 8.610482e-01 | 0.0890049421  | 0.795353630 | 0.9995992 | -9.091856e-02 | 0.612391706 | 0.9546035 | 0.1677519263  | 3.144732e-01 |
| S100A8                  | 0.2350462055  | 1.964188e-01 | 6.539918e-01 | -0.0458424814 | 0.803373121 | 0.9995992 | 4.534614e-02  | 0.404025079 | 0.9546035 | 0.0391341605  | 4.154300e-01 |
| SLC25A5,SLC25A4,SLC25A5 | -0.0530102312 | 9.111179e-01 | 9.722363e-01 | 0.5992182908  | 0.191812305 | 0.9995992 | 2.333971e-01  | 0.312713080 | 0.9546035 | 0.8070458143  | 3.682287e-02 |
| SERPINA5                | 0.0934388214  | 4.791658e-01 | 8.125882e-01 | 0.0177832646  | 0.895812140 | 0.9995992 | -1.172125e-01 | 0.806844716 | 0.9572213 | -0.0400649564 | 6.125938e-01 |
| SERPIN1                 | 0.0860531219  | 3.841125e-01 | 7.708330e-01 | -0.1257036127 | 0.199648533 | 0.9995992 | -7.576300e-03 | 0.529484214 | 0.9546035 | -0.1586093872 | 4.328121e-01 |
| CFI                     | -0.3505094430 | 2.060289e-03 | 1.313084e-01 | -0.0009170049 | 0.993707292 | 0.9995992 | -2.643087e-02 | 0.588770567 | 0.9546035 | -0.2109548809 | 9.601948e-01 |
| F13B                    | -0.1681969288 | 9.363996e-02 | 5.196358e-01 | 0.0245606822  | 0.807553870 | 0.9995992 | 6.417812e-02  | 0.266919867 | 0.9546035 | -0.0529040883 | 7.012062e-01 |
| ISG15                   | 0.4467794642  | 3.004082e-01 | 7.059294e-01 | 0.2218751483  | 0.600825646 | 0.9995992 | -2.177130e-01 | 0.690985587 | 0.9546035 | -0.4218952125 | 6.109325e-01 |
| MPO                     | 0.1373647499  | 4.141141e-01 | 7.920435e-01 | -0.0707053223 | 0.673099554 | 0.9995992 | -1.367632e-01 | 0.788173894 | 0.9572213 | 0.0878279606  | 3.016454e-01 |
| EIP2S1                  | 0.0853357093  | 3.213326e-01 | 7.229846e-01 | -0.0272503903 | 0.761283617 | 0.9995992 | -2.484276e-02 | 0.609826538 | 0.9546035 | -0.1684992758 | 6.954357e-01 |
| HMGN2                   | -0.4879639902 | 2.348096e-01 | 6.697768e-01 | -0.1785338372 | 0.674519247 | 0.9995992 | -7.000109e-02 | 0.566432647 | 0.9546035 | -0.1017883709 | 5.893486e-01 |
| RPLP2                   | 0.0192325159  | 9.366048e-01 | 9.823132e-01 | -0.0803862812 | 0.747359278 | 0.9995992 | -3.535981e-01 | 0.933106884 | 0.9667703 | -0.3043250650 | 8.789940e-01 |
| RPLP0,RPLP0P6           | 0.4043388316  | 1.221755e-01 | 5.724507e-01 | 0.0976887506  | 0.709306826 | 0.9995992 | -8.751142e-02 | 0.828137697 | 0.9546035 | 0.1363887066  | 2.986728e-01 |
| CLEC3B                  | -0.3367999452 | 1.341899e-03 | 1.319384e-01 | -0.1035373391 | 0.351265883 | 0.9995992 | -2.851547e-02 | 0.591696781 | 0.9546035 | -0.1358606948 | 6.951111e-01 |
| SSB                     | 0.0353451621  | 7.454537e-01 | 9.009472e-01 | 0.0176508338  | 0.871260028 | 0.9995992 | -1.264982e-01 | 0.873173673 | 0.9572213 | -0.0033197329 | 5.128073e-01 |
| SERPINA7                | 0.0625009537  | 6.197297e-01 | 8.419469e-01 | 0.0164444012  | 0.894043987 | 0.9995992 | -1.974448e-01 | 0.938290092 | 0.9681131 | -0.1166745392 | 8.250089e-01 |
| SERPIND1                | -0.0906285847 | 3.496771e-01 | 7.487934e-01 | -0.0701967338 | 0.476795481 | 0.9995992 | -5.044152e-03 | 0.520289068 | 0.9546035 | -0.1118909531 | 6.659070e-01 |
| ITGB1                   | -1.7850965338 | 6.709924e-02 | 4.639407e-01 | -0.4266194583 | 0.637540598 | 0.9995992 | 0.8089717e-02 | 0.462668434 | 0.9546035 | 0.0633758547  | 4.737346e-01 |
| UROD                    | 0.0840782835  | 4.826060e-01 | 8.129736e-01 | -0.0126371858 | 0.917896339 | 0.9995992 | -1.000596e-02 | 0.532659384 | 0.9546035 | 0.0176055170  | 4.458957e-01 |
| BCHE                    | -0.1851444377 | 1.828486e-01 | 6.356009e-01 | -0.2189380398 | 0.132682552 | 0.9995992 | -1.160420e-02 | 0.800624344 | 0.9572213 | -0.1130568420 | 7.842025e-01 |
| IGKV2-30                | 0.0844138941  | 6.949074e-01 | 8.664351e-01 | -0.0568228472 | 0.789174411 | 0.9995992 | -3.275210e-01 | 0.934871799 | 0.9667703 | -0.0664208899 | 6.198343e-01 |
| IGKV4-1                 | 0.0174555760  | 9.097211e-01 | 9.722363e-01 | 0.2140671490  | 0.154696024 | 0.9995992 | 1.513111e-01  | 0.160829087 | 0.9546035 | 0.1025433432  | 2.544031e-01 |
| IGHV4-34                | -0.0165047298 | 9.175168e-01 | 9.741133e-01 | -0.0582581717 | 0.716811027 | 0.9995992 | 8.863424e-02  | 0.292933717 | 0.9546035 | -0.0116658725 | 5.295207e-01 |
| GSN                     | -0.1144466602 | 2.615507e-01 | 6.900429e-01 | 0.0668317413  | 0.512279442 | 0.9995992 | -1.157117e-02 | 0.544823232 | 0.9546035 | -0.0374838478 | 6.327592e-01 |
| PTMA                    | 0.2471041762  | 2.882082e-01 | 6.987920e-01 | -0.0069070839 | 0.976794939 | 0.9995992 | -2.813901e-01 | 0.117651840 | 0.9546035 | 0.1470825977  | 2.680341e-01 |
| ATP5F1B                 | -0.3291821384 | 1.138996e-01 | 5.517720e-01 | 0.0209545539  | 0.820546880 | 0.9995992 | 5.651393e-02  | 0.396122072 | 0.9546035 | 0.1491741739  | 2.384087e-01 |
| C2                      | -0.0634284887 | 4.766816e-01 | 8.125882e-01 | -0.0878377464 | 0.352180811 | 0.9995992 | 1.454566e-02  | 0.433545152 | 0.9546035 | -0.0568689143 | 7.181182e-01 |
| S100A9                  | 0.2119449019  | 2.117336e-01 | 6.680462e-01 | -0.0315646233 | 0.859592420 | 0.9995992 | -1.745255e-03 | 0.504001008 | 0.9546035 | 0.0466570061  | 3.919767e-01 |
| S100A6                  | 0.1327895878  | 9.641582e-02 | 5.300628e-01 | -0.0333760741 | 0.689400266 | 0.9995992 | -3.754484e-04 | 0.501804980 | 0.9546035 | -0.0025601821 | 5.124960e-01 |
| APOA4                   | -0.0898345828 | 6.987488e-01 | 6.889477e-01 | 0.1439549816  | 0.520456706 | 0.9995992 | -1.279826e-01 | 0.706162894 | 0.9546035 | -0.0420076609 | 5.727098e-01 |
| E1F4E                   | -0.0214551492 | 8.203410e-01 | 9.407844e-01 | -0.0057707582 | 0.951364797 | 0.9995992 | 8.623333e-02  | 0.184540780 | 0.9546035 | -0.0434956292 | 6.676517e-01 |
| ENO1                    | 0.0831536695  | 2.736164e-01 | 6.944775e-01 | -0.0561905930 | 0.481145309 | 0.9995992 | 3.308328e-02  | 0.338021378 | 0.9546035 | -0.0613832870 | 7.786112e-01 |
| PYGL                    | 0.2815549016  | 8.095964e-02 | 5.027637e-01 | 0.0284658928  | 0.865282999 | 0.9995992 | -2.968213e-02 | 0.570935822 | 0.9546035 | 0.1519329061  | 1.819398e-01 |
| GPI                     | 0.0498818040  | 6.485993e-01 | 8.489971e-01 | 0.0682102316  | 0.540686713 | 0.9995992 | 6.394490e-02  | 0.276798302 | 0.9546035 | 0.1519538080  | 9.345424e-02 |
| TPM3                    | -0.0116311683 | 8.511349e-01 | 9.517895e-01 | -0.0012798757 | 0.984323191 | 0.9995992 | -5.446517e-02 | 0.813830458 | 0.9572213 | 0.0383807365  | 2.802604e-01 |
| LDHB                    | 0.1202713449  | 1.165528e-01 | 5.600218e-01 | -0.0507916118 | 0.501205601 | 0.9995992 | -4.620379e-02 | 0.718426692 | 0.9546035 | 0.0457875128  | 2.720086e-01 |
| GPX1                    | -0.0669030630 | 6.030824e-01 | 8.419469e-01 | -0.1753803740 | 0.175778472 | 0.9995992 | -1.740098e-01 | 0.911318775 | 0.9634871 | -0.1287603216 | 6.347726e-01 |
| PROS1                   | -0.1002157818 | 3.256900e-01 | 7.249823e-01 | 0.1479586919  | 0.152849430 | 0.9995992 | -0.069772e-02 | 0.654221875 | 0.9546035 | -0.0455329864 | 6.628046e-01 |
| P4HB                    | -0.183534256  | 4.899640e-01 | 8.151018e-01 | -0.2660087377 | 0.335167542 | 0.9995992 | 3.788158e-02  | 0.443928287 | 0.9546035 | -0.030888974  | 2.300116e-01 |
| ACYP1                   | -0.0156004440 | 8.412832e-01 | 9.500891e-01 | 0.0926155263  | 0.238722959 | 0.9995992 | 6.155155e-02  | 0.217179538 | 0.9546035 | 0.1582773648  | 2.572316e-02 |
| CTSD                    | -0.0970980517 | 6.014635e-01 | 8.419469e-01 | -0.1495142137 | 0.436622675 | 0.9995992 | -1.151125e-01 | 0.731335000 | 0.9546035 | -0.3446355354 | 5.929084e-01 |
| C8A                     | -0.1785280157 | 6.727812e-02 | 4.639407e-01 | -0.0911416532 | 0.348305266 | 0.9995992 | 2.864626e-02  | 0.388253701 | 0.9546035 | -0.1729078729 | 6.826842e-01 |
| C8B                     | -0.1720841527 | 5.511866e-02 | 4.582264e-01 | -0.0131218931 | 0.885400240 | 0.9995992 | 4.289821e-02  | 0.320294940 | 0.9546035 | -0.0881288072 | 8.385344e-01 |
| GP1BA                   | -0.5724759588 | 1.429422e-01 | 6.099555e-01 | 0.0125550077  | 0.974514265 | 0.9995992 | -3.439770e-01 | 0.810733384 | 0.9572213 | -0.1860101383 | 6.710310e-01 |
| C8G                     | -0.2290150741 | 3.920967e-02 | 4.198744e-01 | 0.0208584038  | 0.852623782 | 0.9995992 | 2.935931e-02  | 0.397870085 | 0.9546035 | -0.0854458547 | 7.817303e-01 |
| CAPN1                   | 0.0026049896  | 9.651328e-01 | 9.923248e-01 | 0.0090252100  | 0.881777302 | 0.9995992 | 1.064753e-01  | 0.036467226 | 0.9546035 | 0.0976774413  | 4.536262e-02 |
| TUBB                    | -0.1219428871 | 2.673874e-01 | 6.987920e-01 | -0.0342010095 | 0.762495017 | 0.9995992 | 5.448674e-02  | 0.322217448 | 0.9546035 | 0.0553491681  | 3.139452e-01 |
| CA3                     | 0.1052876520  | 4.390692e-01 | 8.02         |               |             |           |               |             |           |               |              |



|          |               |              |              |               |             |           |               |             |           |               |              |
|----------|---------------|--------------|--------------|---------------|-------------|-----------|---------------|-------------|-----------|---------------|--------------|
| MBL2     | 0.6067574847  | 1.460993e-01 | 6.145529e-01 | 0.4012762315  | 0.331047693 | 0.9995992 | -2.001593e-01 | 0.681902920 | 0.9548035 | 0.2924340611  | 2.568950e-01 |
| SPTB     | 0.1053300663  | 2.767940e-01 | 6.983553e-01 | 0.0640089111  | 0.503826629 | 0.9995992 | -7.730738e-02 | 0.782920413 | 0.9548035 | 0.0942545414  | 1.509549e-01 |
| LAMP1    | -0.563739832  | 1.811651e-01 | 6.347267e-01 | -0.1905192693 | 0.661350292 | 0.9995992 | 1.131651e-01  | 0.393941119 | 0.9548035 | 0.2376762963  | 2.941249e-01 |
| G6PD     | 0.0539872698  | 4.051279e-01 | 7.850184e-01 | 0.0437665648  | 0.511562158 | 0.9995992 | 9.183032e-03  | 0.444985144 | 0.9548035 | 0.0763340699  | 1.328158e-01 |
| MTFHF01  | -0.0745107566 | 4.788512e-01 | 8.126882e-01 | -0.1199839924 | 0.251367909 | 0.9995992 | 2.063238e-02  | 0.423443527 | 0.9548035 | -0.1189227157 | 8.747956e-01 |
| CETP     | -0.0205248337 | 8.962413e-01 | 9.687085e-01 | -0.1790022116 | 0.351126646 | 0.9995992 | 3.275845e-01  | 0.045226209 | 0.9548035 | -0.0954349359 | 6.872422e-01 |
| EPX      | -0.0972330552 | 6.218368e-01 | 8.419469e-01 | -0.1276360637 | 0.512776105 | 0.9995992 | -1.594683e-01 | 0.788065808 | 0.9572213 | 0.0104667670  | 4.788457e-01 |
| SCGB1A1  | 1.2930310495  | 4.126340e-01 | 7.920435e-01 | 1.4339091634  | 0.365174691 | 0.9995992 | -9.371139e-01 | 0.727587288 | 0.9548035 | 0.1727290404  | 8.272087e-01 |
| ADH5     | -0.0917257455 | 3.763847e-01 | 7.647336e-01 | -0.0111536589 | 0.914503651 | 0.9995992 | -5.621296e-02 | 0.73699570  | 0.9548035 | 0.0168148767  | 4.385016e-01 |
| PRPS2    | -0.5144567240 | 1.392358e-01 | 6.012201e-01 | 0.2141575723  | 0.529840169 | 0.9995992 | -1.267741e-01 | 0.642733718 | 0.9548035 | 0.1695318967  | 3.059008e-01 |
| HARS1    | 0.2116368769  | 4.935227e-01 | 8.151018e-01 | 0.1951940911  | 0.535987446 | 0.9995992 | 3.493695e-01  | 0.125949212 | 0.9548035 | 0.5117833212  | 5.123141e-02 |
| F5       | -0.1577887704 | 2.851315e-01 | 6.987920e-01 | -0.1544061177 | 0.310333860 | 0.9995992 | -1.449132e-02 | 0.538111575 | 0.9548035 | -0.1079767766 | 7.619324e-01 |
| ANXA3    | -0.6540582944 | 3.713104e-01 | 7.647280e-01 | -0.7226298188 | 0.358880053 | 0.9995992 | -9.196776e-01 | 0.893193593 | 0.9579808 | -0.8806255747 | 8.491691e-01 |
| RNASE3   | -0.3633229489 | 1.524541e-01 | 6.224838e-01 | -0.0699696880 | 0.785669675 | 0.9995992 | -2.569371e-01 | 0.843340599 | 0.9572213 | -0.1653280922 | 7.348239e-01 |
| ACTN1    | -0.0936782598 | 4.573970e-01 | 8.069393e-01 | 0.1030641344  | 0.410753663 | 0.9995992 | 2.329297e-02  | 0.428481818 | 0.9548035 | 0.1111260527  | 1.825345e-01 |
| MYL4     | 0.1071012235  | 5.906854e-01 | 8.419469e-01 | 0.0121344003  | 0.948942331 | 0.9995992 | 3.587713e-01  | 0.039998543 | 0.9548035 | 0.1028727546  | 2.830324e-01 |
| PEPD     | -0.0322548069 | 7.697474e-01 | 9.192799e-01 | 0.1404269923  | 0.230374702 | 0.9995992 | 2.231507e-02  | 0.419695147 | 0.9548035 | 0.1136398583  | 1.702837e-01 |
| COX4I1   | -0.9921140743 | 1.681023e-01 | 6.287166e-01 | 0.0418662360  | 0.952487217 | 0.9995992 | -1.820924e-01 | 0.607582871 | 0.9548035 | 0.4623518516  | 2.584397e-01 |
| GP1BB    | -0.8401482789 | 7.019804e-02 | 4.698433e-01 | 0.0845658078  | 0.813703224 | 0.9995992 | -1.421528e-01 | 0.656728934 | 0.9548035 | 0.3006790113  | 0.880184e-01 |
| LAMP2    | -0.5259289791 | 2.342588e-01 | 6.697768e-01 | -0.1515662419 | 0.735967337 | 0.9995992 | -2.887038e-01 | 0.736433613 | 0.9548035 | -0.5670962688 | 9.005603e-01 |
| RNH1     | 0.1748240441  | 2.134508e-02 | 4.532296e-01 | -0.0237326167 | 0.761033359 | 0.9995992 | -2.567825e-02 | 0.625580968 | 0.9548035 | 0.0713074036  | 1.801015e-01 |
| BMP1;TL2 | -0.1315783652 | 2.315347e-01 | 6.697768e-01 | -0.0758997734 | 0.498087532 | 0.9995992 | -1.648482e-01 | 0.934841531 | 0.9667703 | -0.1549856754 | 4.146415e-01 |
| ICAM2    | -0.2377638650 | 3.217275e-01 | 7.225946e-01 | 0.0830341735  | 0.721845489 | 0.9995992 | -2.862555e-01 | 0.867664615 | 0.9579808 | -0.0377847409 | 5.622092e-01 |
| EEF2     | 0.0759157212  | 6.719341e-01 | 8.576613e-01 | 0.1571456890  | 0.366597310 | 0.9995992 | -1.862277e-02 | 0.540605252 | 0.9548035 | 0.1687190418  | 1.680025e-01 |
| PDIA4    | 4.8203069898  | 1.351801e-01 | 9.32126e-01  | -0.2145581293 | 0.902582731 | 0.9995992 | 4.816101e-01  | 0.394014741 | 0.9548035 | -0.0423107177 | 5.094535e-01 |
| C6       | -0.0785439366 | 5.294156e-01 | 8.277370e-01 | -0.0477171618 | 0.711853866 | 0.9995992 | 1.108216e-01  | 0.193079492 | 0.9548035 | 0.0353474994  | 3.885821e-01 |
| TPY1     | 0.0672663854  | 5.668562e-01 | 8.344560e-01 | -0.1507657656 | 0.21205928  | 0.9995992 | 1.078364e-01  | 0.181983514 | 0.9548035 | -0.0935163667 | 7.672227e-01 |
| ALAD     | 0.1624822225  | 3.732572e-02 | 4.123271e-01 | 0.0557328576  | 0.503545925 | 0.9995992 | 8.080956e-02  | 0.156573037 | 0.9548035 | 0.1310950565  | 6.057078e-02 |
| PRG2     | -0.0418286138 | 9.827043e-01 | 9.920806e-01 | 0.1961605474  | 0.819672238 | 0.9995992 | 3.948806e-01  | 0.354744635 | 0.9548035 | 0.0168411540  | 4.920698e-01 |
| LCPI     | 0.0044182170  | 9.613929e-01 | 9.920806e-01 | -0.0251035027 | 0.772651548 | 0.9995992 | -4.272239e-02 | 0.685118863 | 0.9548035 | 0.0284820666  | 3.685783e-01 |
| APEH     | -0.1307088366 | 3.019007e-01 | 7.082166e-01 | 0.0123959498  | 0.924879513 | 0.9995992 | 9.051104e-02  | 0.420303428 | 0.9548035 | 0.1344828483  | 1.828017e-01 |
| ETFA     | 0.2251713816  | 2.860200e-01 | 6.987920e-01 | 0.2370151643  | 0.276799415 | 0.9995992 | 1.441551e-01  | 0.253033731 | 0.9548035 | 0.0406616888  | 4.252993e-01 |
| CD59     | -0.4029429260 | 3.476438e-01 | 7.479692e-01 | 0.0843481091  | 0.845049360 | 0.9995992 | 7.899999e-02  | 0.427510900 | 0.9548035 | 0.4925818952  | 1.280442e-01 |
| SELL     | 0.0454741071  | 8.166387e-01 | 9.406531e-01 | -0.2122194472 | 0.276912257 | 0.9995992 | -2.495727e-02 | 0.551199349 | 0.9548035 | -0.1739842601 | 8.014846e-01 |
| MF       | -0.0992424934 | 3.326747e-01 | 7.329444e-01 | -0.0601726709 | 0.568871340 | 0.9995992 | 1.349045e-01  | 0.092239161 | 0.9548035 | 0.1549855003  | 7.926000e-02 |
| CD99     | -1.2727644932 | 2.150918e-01 | 6.680462e-01 | -1.3194204622 | 0.252569331 | 0.9995992 | -1.086110e+00 | 0.857524295 | 0.9572213 | -1.3114962973 | 8.277714e-01 |
| PRKCSH   | -0.4789454092 | 1.063199e-01 | 5.382651e-01 | -0.2602827953 | 0.398918310 | 0.9995992 | -1.863972e-02 | 0.524814766 | 0.9548035 | 0.0280881618  | 4.623447e-01 |
| HCLS1    | 0.1637335041  | 3.528271e-01 | 7.498135e-01 | 0.1392140053  | 0.426765961 | 0.9995992 | -3.688044e-01 | 0.981351015 | 0.9880085 | -0.1267141043 | 7.529264e-01 |
| FDP5     | 0.1899647343  | 5.131783e-02 | 4.562264e-01 | 0.1732376650  | 0.095374685 | 0.9995992 | 8.130152e-02  | 0.209613689 | 0.9548035 | 0.1271981147  | 1.169696e-01 |
| AKR1A1   | 0.1476184006  | 3.227834e-01 | 7.225946e-01 | -0.0319516999 | 0.829250207 | 0.9995992 | 6.980777e-02  | 0.324434952 | 0.9548035 | 0.0570700298  | 3.542769e-01 |
| PKM      | 0.0700156348  | 5.615374e-01 | 8.323189e-01 | 0.0842395177  | 0.474546033 | 0.9995992 | -7.752788e-02 | 0.737648236 | 0.9548035 | -0.0183061180 | 5.624373e-01 |
| HSP90B1  | -0.3574952116 | 1.006901e-01 | 5.314990e-01 | -0.2260487820 | 0.321086234 | 0.9995992 | 1.234331e-01  | 0.289753198 | 0.9548035 | 0.1748329820  | 2.037289e-01 |
| IDE      | 0.2741196803  | 1.171972e-02 | 3.084914e-01 | 0.0424268820  | 0.702277929 | 0.9995992 | -6.169866e-02 | 0.711370998 | 0.9548035 | 0.1623382199  | 6.276234e-02 |
| GP9      | -0.9295198445 | 4.151300e-02 | 4.250683e-01 | 0.1575785273  | 0.722386375 | 0.9995992 | 6.247226e-02  | 0.444681979 | 0.9548035 | 0.1978679806  | 3.295142e-01 |
| MMAP9    | 0.5658747885  | 2.035722e-02 | 3.455296e-01 | -0.0490008635 | 0.841929186 | 0.9995992 | -3.031836e-02 | 0.548130966 | 0.9548035 | 2.4040415462  | 1.581118e-01 |
| DARS1    | 0.0558762275  | 4.453179e-01 | 8.021362e-01 | 0.0953031274  | 0.181955433 | 0.9995992 | -5.195026e-02 | 0.761898634 | 0.9561271 | 0.0972122153  | 9.312136e-02 |
| UCR9B    | -0.1802744706 | 1.222581e-01 | 5.724507e-01 | -0.0368237006 | 0.759220402 | 0.9995992 | -5.707001e-03 | 0.519035163 | 0.9548035 | -0.1107849369 | 8.226265e-01 |
| AKR1B1   | 0.0640945175  | 6.650526e-01 | 8.576613e-01 | -0.1885079938 | 0.215603444 | 0.9995992 | -4.537762e-02 | 0.512071310 | 0.9548035 | -0.1053089102 | 7.497351e-01 |
| ANPEP    | -0.3652785368 | 5.118563e-01 | 8.164833e-01 | -0.5506067740 | 0.323697119 | 0.9995992 | 5.930983e-02  | 0.458636664 | 0.9548035 | -0.7175536637 | 8.988514e-01 |
| RAC2     | 0.0072684157  | 9.781102e-01 | 9.932356e-01 | 0.1545430963  | 0.556495910 | 0.9995992 | -2.808982e-02 | 0.541126970 | 0.9548035 | 0.1742381931  | 2.551103e-01 |
| CPH1     | -0.1954868577 | 7.035725e-02 | 4.698433e-01 | -0.1585013577 | 0.152317714 | 0.9995992 | -4.326809e-02 | 0.652487465 | 0.9548035 | -0.2065386735 | 9.647221e-01 |
| GSPT1    | 0.1888516835  | 1.570570e-01 | 6.224838e-01 | 0.0465501977  | 0.728044215 | 0.9995992 | 5.592668e-02  | 0.266179357 | 0.9548035 | 0.0546487591  | 3.426639e-01 |
| EZR      | 0.1570673993  | 3.106801e-01 | 7.192836e-01 | -0.1007759141 | 0.507119749 | 0.9995992 | 8.481455e-02  | 0.296001967 | 0.9548035 | -0.1376299756 | 8.105757e-01 |
| UCHL3    | -0.0264598987 | 7.316882e-01 | 8.93254e-01  | -0.0155301796 | 0.842917853 | 0.9995992 | -3.952972e-02 | 0.690575427 | 0.9548035 | 0.0450682515  | 2.813045e-01 |
| NME1     | 0.0939716539  | 2.294221e-01 | 6.697768e-01 | 0.0142124818  | 0.857528725 | 0.9995992 | -1.008351e-01 | 0.989390804 | 0.9579808 | 0.0075155679  | 4.617273e-01 |
| IGL1     | 0.1910273824  | 2.623314e-01 | 6.900429e-01 | -0.0278165740 | 0.868447453 | 0.9995992 | -2.857126e-02 | 0.565473553 | 0.9548035 | 0.0720640856  | 3.315895e-01 |
| DSP      | 0.0977312502  | 8.732016e-01 | 9.614924e-01 | -0.0240236364 | 0.969123954 | 0.9995992 | -3.886989e-01 | 0.733189859 | 0.9548035 | -0.1582955180 | 5.979201e-01 |
| CD44     | -0.2310199877 | 4.814131e-01 | 8.129736e-01 | 0.0388381433  | 0.906477477 | 0.9995992 | -1.000159e-01 | 0.617832727 | 0.9548035 | 0.3467669416  | 1.367722e-01 |
| NOO2     | -0.4121446103 | 1.317055e-01 | 5.830575e-01 | 0.3166719615  | 0.253734767 | 0.9995992 | 2.157790e-01  | 0.219705141 | 0.9548035 | 0.3108891367  | 1.588522e-01 |
| CBR1     | -0.1097203233 | 2.258702e-01 | 6.697768e-01 | 0.0096522585  | 0.918557377 | 0.9995992 | -1.074653e-02 | 0.546088521 | 0.9548035 | 0.0374960171  | 3.460632e-01 |
| ANK1     | 0.0338725770  | 5.781204e-01 | 8.363994e-01 | 0.0402187724  | 0.515893242 | 0.9995992 | 2.287892e-02  | 0.357305781 | 0.9548035 | 0.1332322512  | 1.935691e-02 |
| H1-5     | 0.0171644247  | 9.064998e-01 | 9.710488e-01 | -0.0216223987 | 0.880592721 | 0.9995992 | 5.852169e-02  | 0.347315002 | 0.9548035 | 0.0003773640  | 4.896037e-01 |
| H1-3     | -0.2657635933 | 2.678937e-01 | 6.940168e-01 | -0.1063404396 | 0.659088331 | 0.9995992 | 1.655333e-01  | 0.250003881 | 0.9548035 | 0.1519922646  | 2.602953e-01 |
| EPB42    | -0.0450044321 | 6.726329e-01 | 8.576613e-01 | 0.0333398501  | 0.739975863 | 0.9995992 | 9.738624e-03  | 0.463918940 | 0.9548035 | 0.1297757282  | 1.145566e-01 |
| CD36     | -0.7914375443 | 8.084960e-02 | 5.027637e-01 | 0.3186743297  | 0.453897601 | 0.9995992 | 2.733828e-01  | 0.273596983 | 0.9548035 |               |              |

|          |               |              |              |               |              |           |               |             |           |                |              |
|----------|---------------|--------------|--------------|---------------|--------------|-----------|---------------|-------------|-----------|----------------|--------------|
| RPS12    | 0.2160733461  | 1.661508e-01 | 6.287166e-01 | 0.0571793306  | 0.710670779  | 0.9995992 | 3.309335e-02  | 0.418365305 | 0.9546035 | -0.0942243221  | 7.303717e-01 |
| DNAJB1   | 0.0740765778  | 4.842210e-01 | 8.129736e-01 | -0.0093133227 | 0.929934164  | 0.9995992 | 9.302122e-02  | 0.193973861 | 0.9546035 | 0.1789230583   | 4.022675e-02 |
| DNAJB2   | -0.0001709445 | 9.979405e-01 | 9.990571e-01 | -0.0537228117 | 0.4101712708 | 0.9995992 | 6.489804e-02  | 0.166920425 | 0.9546035 | -0.0065956764  | 5.373022e-01 |
| ATP5F1A  | -0.3622197115 | 9.837501e-02 | 5.314990e-01 | 0.0969489434  | 0.661729437  | 0.9995992 | 8.396333e-02  | 0.353429293 | 0.9546035 | 0.3118405772   | 7.552395e-02 |
| PSMA1    | 0.1328307004  | 5.731480e-02 | 4.562264e-01 | -0.0140480842 | 0.844800570  | 0.9995992 | -1.291404e-01 | 0.964765074 | 0.9774190 | -0.0306320771  | 6.663257e-01 |
| PSMA2    | 0.0555234051  | 6.051073e-01 | 8.419469e-01 | 0.0535915241  | 0.610353759  | 0.9995992 | 9.900803e-02  | 0.184870292 | 0.9546035 | 0.1609650696   | 6.198916e-02 |
| PSMA3    | 0.1036385360  | 1.050540e-01 | 5.375490e-01 | -0.0587801944 | 0.377287567  | 0.9995992 | -2.875876e-02 | 0.672201137 | 0.9546035 | -0.0172147543  | 6.020246e-01 |
| PSMA4    | 0.0315326894  | 6.787933e-01 | 8.610482e-01 | -0.0866111870 | 0.264560315  | 0.9995992 | 2.403889e-02  | 0.376033063 | 0.9546035 | 0.0067343282   | 4.657562e-01 |
| S100P    | 0.1408891090  | 5.421083e-01 | 8.281031e-01 | -0.1916403304 | 0.392047851  | 0.9995992 | -2.583478e-01 | 0.865984970 | 0.9572213 | -0.0074338154  | 5.134483e-01 |
| MSN      | -0.0101450502 | 8.682258e-01 | 9.586801e-01 | 0.1034482345  | 0.101766671  | 0.9995992 | 2.677371e-02  | 0.331201779 | 0.9546035 | 0.1173844690   | 3.402769e-02 |
| S100A4   | 0.0765848598  | 6.368983e-01 | 8.484797e-01 | -0.1266841051 | 0.424930137  | 0.9995992 | -2.720043e-01 | 0.950934531 | 0.9714819 | 0.1196412248   | 2.244612e-01 |
| HMG2     | 0.0862040067  | 6.235042e-01 | 8.419469e-01 | 0.0543471454  | 0.765062212  | 0.9995992 | 8.851705e-02  | 0.102220005 | 0.9546035 | 0.1668267662   | 1.815242e-01 |
| PTBP1    | -0.0198950340 | 8.763286e-01 | 9.635539e-01 | -0.0373526752 | 0.774040519  | 0.9995992 | -5.268643e-02 | 0.673035758 | 0.9546035 | 0.0196539826   | 4.272787e-01 |
| EEF10    | 0.0719345674  | 7.866700e-01 | 9.309940e-01 | -0.0582277700 | 0.833296170  | 0.9995992 | -1.864099e-01 | 0.748181843 | 0.9546035 | -0.0475390912  | 5.674411e-01 |
| MST1     | 0.0726640321  | 7.167175e-01 | 8.824584e-01 | -0.1334468437 | 0.507695388  | 0.9995992 | -2.619741e-01 | 0.901018705 | 0.9579808 | -0.1187688826  | 7.204238e-01 |
| STOM     | -0.6106067065 | 3.002441e-01 | 7.059294e-01 | 0.1296801748  | 0.823810313  | 0.9995992 | 2.833033e-02  | 0.480640351 | 0.9546035 | 0.6949477199   | 1.230980e-01 |
| PON1     | -0.2599124415 | 9.128323e-02 | 5.171548e-01 | -0.2209039628 | 0.153625388  | 0.9995992 | 3.696848e-03  | 0.490739203 | 0.9546035 | -0.1914075777  | 9.008220e-01 |
| YWHAQ    | -0.0376114130 | 7.041419e-01 | 8.724274e-01 | 0.0543497603  | 0.582119833  | 0.9995992 | -1.085726e-02 | 0.542997357 | 0.9546035 | -0.0079426795  | 5.325462e-01 |
| CALR     | -0.4114765827 | 1.286725e-01 | 5.792482e-01 | -0.2872982879 | 0.294794643  | 0.9995992 | 1.197870e-01  | 0.332003436 | 0.9546035 | 0.0719751400   | 3.988782e-01 |
| CANX     | -0.3359919225 | 2.761775e-01 | 6.983553e-01 | -0.1627789178 | 0.740657715  | 0.9995992 | 5.554457e-02  | 0.455315734 | 0.9546035 | 0.5041057477   | 1.473498e-01 |
| CFP      | -0.3305034223 | 2.289687e-02 | 3.469756e-01 | 0.1007321145  | 0.518229826  | 0.9995992 | -0.178116e-02 | 0.744541117 | 0.9546035 | -0.0019087448  | 5.046997e-01 |
| PSMA5    | 0.0782833431  | 2.134435e-01 | 6.680462e-01 | 0.0034591689  | 0.956013477  | 0.9995992 | -7.810944e-02 | 0.899887807 | 0.9579808 | -0.0008081022  | 5.050077e-01 |
| PSMB4    | 0.1034393030  | 2.200923e-01 | 6.697768e-01 | -0.1155107702 | 0.170191130  | 0.9995992 | 3.485771e-02  | 0.343708997 | 0.9546035 | 0.0360491420   | 3.350362e-01 |
| PSMB6    | 0.0809705653  | 2.836943e-01 | 6.987920e-01 | -0.1105863726 | 0.150084466  | 0.9995992 | -8.195045e-02 | 0.851674326 | 0.9572213 | -0.1035777995  | 9.219502e-01 |
| PSMB5    | 0.1226798312  | 1.020730e-01 | 5.314990e-01 | -0.0441420014 | 0.573115236  | 0.9995992 | 1.414610e-02  | 0.428027253 | 0.9546035 | 0.0121007984   | 4.405662e-01 |
| TMOD1    | 0.1518284014  | 2.447524e-02 | 3.507394e-01 | 0.0185613699  | 0.787677931  | 0.9995992 | 1.695788e-03  | 0.490481542 | 0.9546035 | 0.0828706566   | 1.125461e-01 |
| MAPK1    | 0.2006050718  | 5.336029e-02 | 4.562264e-01 | 0.1544633724  | 0.138411755  | 0.9995992 | 1.092473e-02  | 0.459449249 | 0.9546035 | 0.0614714148   | 2.835904e-01 |
| GCA      | 0.1209871765  | 2.873755e-01 | 6.987920e-01 | -0.0069818411 | 0.952190554  | 0.9995992 | -6.278434e-02 | 0.705054236 | 0.9546035 | -0.0261531608  | 5.899319e-01 |
| LAP3     | 0.1789466918  | 5.501934e-01 | 8.284440e-01 | 0.6188621281  | 0.031797917  | 0.9995992 | 3.137511e-01  | 0.155950140 | 0.9546035 | 0.6308592324   | 1.096932e-02 |
| TPP2     | 0.0957081072  | 1.761156e-01 | 6.320739e-01 | 0.0798671713  | 0.269762475  | 0.9995992 | -1.863139e-02 | 0.606926571 | 0.9546035 | 0.1216133210   | 5.294922e-02 |
| TKT      | 0.1190737785  | 2.385576e-01 | 6.725635e-01 | 0.1200211679  | 0.230466811  | 0.9995992 | -2.164813e-02 | 0.583146667 | 0.9546035 | 0.0594855410   | 2.771308e-01 |
| SERPINA4 | -0.2511565262 | 2.156953e-02 | 3.455296e-01 | 0.1095653881  | 0.338014431  | 0.9995992 | 4.579773e-02  | 0.345575996 | 0.9546035 | 0.0412113428   | 3.563453e-01 |
| EEF1D    | -0.9862767255 | 8.396897e-02 | 5.027637e-01 | 0.8731775554  | 0.113154523  | 0.9995992 | 1.035517e-00  | 0.037408813 | 0.9546035 | 0.7903632339   | 7.126375e-02 |
| AQP1     | -0.6231562513 | 4.031736e-01 | 7.844847e-01 | -0.0514458981 | 0.945505179  | 0.9995992 | -2.697268e-01 | 0.643171295 | 0.9546035 | 0.4472444727   | 2.879721e-01 |
| PRDX6    | 0.0191075678  | 8.162069e-01 | 9.406531e-01 | 0.1609518131  | 0.041654291  | 0.9995992 | 1.975536e-01  | 0.008125859 | 0.9546035 | 0.2905915448   | 4.170238e-05 |
| BLVRB    | -0.0454180522 | 5.093276e-01 | 8.151018e-01 | -0.0072337101 | 0.915992630  | 0.9995992 | -2.041286e-02 | 0.612677411 | 0.9546035 | 0.0668702217   | 1.717282e-01 |
| PRDX5    | 0.0807318863  | 3.731736e-01 | 7.647336e-01 | -0.0139996777 | 0.877239414  | 0.9995992 | -1.478773e-01 | 0.947903090 | 0.9707604 | 0.0506063904   | 2.824350e-01 |
| DDT      | 0.0510721649  | 5.187278e-01 | 8.216271e-01 | 0.0723674856  | 0.374518337  | 0.9995992 | -7.620372e-02 | 0.826381841 | 0.9572213 | 0.0795358321   | 1.603738e-01 |
| CMFPK1   | 0.1435653159  | 2.227283e-01 | 6.697768e-01 | -0.1449531785 | 0.214271644  | 0.9995992 | 6.889978e-02  | 0.279960867 | 0.9546035 | -0.0767730337  | 7.354494e-01 |
| PERP1    | 0.0990972599  | 4.110624e-02 | 4.520863e-01 | 0.0097963491  | 0.841561930  | 0.9995992 | 7.122000e-02  | 0.078075154 | 0.9546035 | 0.0653412647   | 8.885153e-02 |
| PDI3A    | -0.4407181436 | 1.220735e-02 | 3.084914e-01 | -0.1149041619 | 0.526320668  | 0.9995992 | 3.710784e-02  | 0.418566338 | 0.9546035 | 0.0846042000   | 3.218309e-01 |
| PPP2R1A  | 0.0944405802  | 1.378373e-01 | 5.989843e-01 | 0.0412919089  | 0.516461861  | 0.9995992 | 1.306239e-01  | 0.021055173 | 0.9546035 | 0.1085814465   | 4.341398e-02 |
| PPP2R1B  | 0.0076355228  | 9.022026e-01 | 9.710488e-01 | -0.0499712096 | 0.425352846  | 0.9995992 | -3.210105e-02 | 0.693667674 | 0.9546035 | 0.0121524865   | 4.259205e-01 |
| FCER1G   | -0.5831138037 | 1.418877e-01 | 6.076494e-01 | -0.0835278713 | 0.836653647  | 0.9995992 | -2.221429e-01 | 0.709476110 | 0.9546035 | 0.1555963165   | 3.526198e-01 |
| ADSL     | -0.039491706  | 6.884743e-01 | 8.657198e-01 | -0.0871546170 | 0.379509225  | 0.9995992 | 6.434181e-02  | 0.265783630 | 0.9546035 | -0.0304320358  | 6.148386e-01 |
| PKR1     | 0.0017982677  | 9.830490e-01 | 9.936280e-01 | 0.0006519488  | 0.993945889  | 0.9995992 | -1.629611e-02 | 0.570673998 | 0.9546035 | 0.0340073470   | 3.414686e-01 |
| SRL      | -0.1717832415 | 5.479758e-02 | 4.562264e-01 | -0.0135203537 | 0.885597650  | 0.9995992 | -7.600668e-02 | 0.800562767 | 0.9572213 | -0.0627982285  | 7.397914e-01 |
| GSTT1    | 0.2842542002  | 2.332726e-01 | 6.697768e-01 | 0.2349671195  | 0.350874540  | 0.9995992 | -8.580416e-02 | 0.639651584 | 0.9546035 | 0.2931399571   | 1.112390e-01 |
| SERPINB1 | 0.0500884701  | 4.756969e-01 | 8.125882e-01 | 0.0240043032  | 0.728696089  | 0.9995992 | -1.819705e-01 | 0.995533273 | 0.9553333 | -0.0990162392  | 3.980423e-01 |
| CORO1A   | -0.0164141100 | 8.957465e-01 | 9.687085e-01 | -0.0695112552 | 0.578501480  | 0.9995992 | -6.942556e-02 | 0.708870678 | 0.9546035 | -0.1287113685  | 8.493359e-01 |
| GDH1     | -0.0528461684 | 6.062072e-01 | 8.414649e-01 | 0.1687493075  | 0.993707913  | 0.9995992 | -1.571794e-02 | 0.564382302 | 0.9546035 | 0.1008018121   | 1.622208e-01 |
| MAT2A    | 0.0740227342  | 3.932379e-01 | 7.802736e-01 | 0.0973306014  | 0.248986712  | 0.9995992 | 4.864341e-02  | 0.290119571 | 0.9546035 | 0.1170496408   | 9.201536e-02 |
| AT1C     | -0.0035478179 | 9.711728e-01 | 9.926294e-01 | -0.0628748477 | 0.514157665  | 0.9995992 | -2.277391e-02 | 0.590028207 | 0.9546035 | 0.0507618487   | 3.051168e-01 |
| YWHA8    | -0.1201759652 | 3.713654e-01 | 7.647280e-01 | 0.1229731902  | 0.372784463  | 0.9995992 | -1.358657e-01 | 0.842423100 | 0.9572213 | 0.1018540569   | 2.399298e-01 |
| STIP1    | -0.0503247809 | 5.406764e-01 | 8.281031e-01 | -0.0656981006 | 0.430829539  | 0.9995992 | -0.100236e-03 | 0.509129204 | 0.9546035 | -0.0358945676  | 6.690865e-01 |
| S100A11  | 0.2985554209  | 6.893454e-02 | 4.656029e-01 | 0.0744029312  | 0.656726601  | 0.9995992 | -5.45147e-02  | 0.625837721 | 0.9546035 | 0.0564789977   | 3.693205e-01 |
| PRDX2    | 0.1784517589  | 3.463643e-02 | 4.027342e-01 | 0.0516622916  | 0.553617005  | 0.9995992 | 4.797175e-03  | 0.478302550 | 0.9546035 | 0.0887700360   | 1.643492e-01 |
| CNDH5    | -0.0323559780 | 8.549029e-01 | 9.533502e-01 | -0.0768695539 | 0.659084880  | 0.9995992 | -2.605544e-01 | 0.928247669 | 0.9658352 | -0.1750904406  | 8.205922e-01 |
| HSPA4    | 0.1026432520  | 5.878792e-02 | 4.562264e-01 | 0.0029547032  | 0.958121072  | 0.9995992 | 4.791548e-03  | 0.466342288 | 0.9546035 | 0.0945294017   | 4.692363e-02 |
| RDX      | -0.3003704284 | 4.524120e-02 | 4.531788e-01 | -0.1034509943 | 0.482932343  | 0.9995992 | 8.878546e-02  | 0.83267926  | 0.9546035 | 0.0017769046   | 4.954599e-01 |
| KRT9     | -0.0611312677 | 9.047794e-01 | 9.710488e-01 | -0.4938951723 | 0.460296979  | 0.9995992 | 1.428810e-01  | 0.420777168 | 0.9546035 | -0.3066611089  | 6.788023e-01 |
| SA4A     | -0.0147355339 | 9.233114e-01 | 9.752941e-01 | -0.2273014926 | 0.140833067  | 0.9995992 | 1.158439e-01  | 0.228039725 | 0.9546035 | -0.2398547457  | 3.940307e-01 |
| MYH9     | -0.0361935621 | 6.689259e-01 | 8.576613e-01 | 0.0496356042  | 0.554077137  | 0.9995992 | 4.296955e-02  | 0.308407359 | 0.9546035 | 0.0527925971   | 2.616539e-01 |
| MYH10    | 1.048829244   | 3.995107e-01 | 7.830730e-01 | -0.9758331951 | 0.453817457  | 0.9995992 | -8.322642e-01 | 0.751490031 | 0.9546035 | -0.05111093238 | 7.753564e-01 |
| ADD1     | -0.0449832164 | 4.375362e-01 | 8.021362e-01 | 0.056085210   | 0.356842596  | 0.9995992 | 2.985132e-02  | 0.307428667 |           |                |              |



|                    |               |              |              |               |              |           |               |             |           |               |              |
|--------------------|---------------|--------------|--------------|---------------|--------------|-----------|---------------|-------------|-----------|---------------|--------------|
| CCT8               | 0.0710933646  | 2.942491e-01 | 7.010683e-01 | 0.0444310181  | 0.528058543  | 0.9995992 | 1.570119e-02  | 0.410216356 | 0.9546035 | 0.0696562087  | 1.651135e-01 |
| CCT4               | -0.0309137345 | 6.202426e-01 | 8.419469e-01 | -0.0323549373 | 6.02345491   | 0.9995992 | -3.784947e-04 | 0.502353459 | 0.9546035 | -0.0152670161 | 5.973717e-01 |
| RAB5C              | -0.1339541696 | 4.772699e-01 | 8.125882e-01 | -0.0041039636 | 0.982065851  | 0.9995992 | 1.209517e-01  | 0.260008465 | 0.9546035 | 0.1580778798  | 1.876695e-01 |
| RAB7A              | -0.3579528333 | 1.548095e-02 | 3.187282e-01 | 0.2056529281  | 0.176381463  | 0.9995992 | 5.977040e-02  | 0.347033933 | 0.9546035 | 0.1680470928  | 1.348837e-01 |
| PSMD7              | 0.2086796700  | 3.150096e-02 | 3.961076e-01 | -0.1362341407 | 0.174332198  | 0.9995992 | 3.967627e-02  | 0.350114829 | 0.9546035 | 0.0634774779  | 2.662089e-01 |
| RPS6KA3            | 0.0712624256  | 5.731676e-01 | 8.344560e-01 | -0.0593707584 | 0.634135109  | 0.9995992 | -7.396465e-03 | 0.522804834 | 0.9546035 | -0.0164812837 | 5.522266e-01 |
| LUM                | 0.0658041626  | 6.208122e-01 | 8.419469e-01 | 0.0442363267  | 0.734576013  | 0.9995992 | -1.415153e-01 | 0.852489809 | 0.9572213 | -0.1385160263 | 8.459457e-01 |
| PGD                | 0.1965083509  | 1.901393e-01 | 1.319384e-01 | -0.0065691663 | 0.921358686  | 0.9995992 | 7.132849e-02  | 0.146329416 | 0.9546035 | 0.0697517485  | 1.436648e-01 |
| ARHGDI4            | 0.01711405689 | 7.866081e-01 | 9.267668e-01 | 0.0702174546  | 0.268002791  | 0.9995992 | 9.383294e-02  | 0.069822675 | 0.9546035 | 0.0690718102  | 1.389766e-01 |
| ARHGDI1B           | 0.1938319446  | 7.761455e-02 | 4.905904e-01 | 0.0574863983  | 0.616945819  | 0.9995992 | -2.463024e-03 | 0.508794548 | 0.9546035 | -0.0712576910 | 7.294789e-01 |
| HNRNP7             | -0.1356884246 | 1.564366e-01 | 6.224838e-01 | -0.0074049073 | 0.937374807  | 0.9995992 | 1.028374e-01  | 0.150935735 | 0.9546035 | 0.0224866083  | 4.057415e-01 |
| RIDA               | 0.1602119544  | 1.524131e-01 | 6.224838e-01 | 0.0184106165  | 0.871584451  | 0.9995992 | 4.338734e-02  | 0.354557326 | 0.9546035 | 0.1576818168  | 7.702140e-02 |
| THOP1              | -0.4591724894 | 6.848204e-02 | 4.650256e-01 | 0.2695266120  | 0.302974274  | 0.9995992 | 3.921832e-03  | 0.493994136 | 0.9546035 | -0.1149554716 | 6.687859e-01 |
| CAPZA1             | 0.1088527049  | 2.000761e-01 | 6.617157e-01 | 0.0887961433  | 0.307730980  | 0.9995992 | 4.803740e-02  | 0.289468404 | 0.9546035 | 0.1418984566  | 5.955169e-02 |
| BLVR4              | 0.0514511607  | 5.997379e-01 | 8.419469e-01 | 0.0405725587  | 0.681816414  | 0.9995992 | 5.947553e-02  | 0.276155461 | 0.9546035 | 0.0520607940  | 3.018337e-01 |
| PPSPC              | -0.1632454386 | 3.496856e-01 | 7.487834e-01 | -0.2802868291 | 0.106130932  | 0.9995992 | 6.386353e-03  | 0.485697227 | 0.9546035 | -0.1806473055 | 8.446407e-01 |
| ACLY               | 0.0447821293  | 4.885755e-01 | 8.151018e-01 | 0.0341715689  | 0.610150941  | 0.9995992 | 5.773394e-02  | 0.188747281 | 0.9546035 | 0.1084709868  | 6.680979e-02 |
| MVD                | 0.1896902934  | 3.385123e-02 | 4.027342e-01 | 0.0107781906  | 0.905539968  | 0.9995992 | -1.266579e-01 | 0.919228280 | 0.9644203 | -0.0400585282 | 6.681373e-01 |
| RABGGTB            | 0.1302820791  | 4.532731e-01 | 8.045226e-01 | 0.0588058671  | 0.734146910  | 0.9995992 | 1.450904e-01  | 0.203378018 | 0.9546035 | 0.0440332895  | 4.005733e-01 |
| AP2S1              | 0.0443243734  | 6.583006e-01 | 8.524806e-01 | -0.0596291443 | 0.558874157  | 0.9995992 | 4.380109e-02  | 0.331908643 | 0.9546035 | 0.0066086747  | 4.736218e-01 |
| SLC16A1            | -0.1650151554 | 4.917027e-01 | 8.151018e-01 | 0.0045231540  | 0.985059072  | 0.9995992 | 1.262174e-01  | 0.302213406 | 0.9546035 | 0.3475540153  | 6.635043e-02 |
| SLC15A1            | -0.0493886309 | 6.381543e-01 | 8.484797e-01 | -0.0016415348 | 0.987518865  | 0.9995992 | -1.882549e-02 | 0.563551581 | 0.9546035 | 0.1313641917  | 1.192655e-01 |
| CRISP3             | 0.0447138891  | 8.252905e-01 | 9.430642e-01 | -0.191601512  | 0.357376075  | 0.9995992 | -7.634206e-02 | 0.643732913 | 0.9546035 | -0.1775909308 | 7.880780e-01 |
| YARS1              | 0.3167653305  | 1.634956e-02 | 9.37282e-01  | -0.2254151055 | 0.099866419  | 0.9995992 | 7.147251e-02  | 0.303700540 | 0.9546035 | -0.1143083958 | 7.893050e-01 |
| USP14              | 0.0890247713  | 1.519883e-01 | 6.224838e-01 | 0.0381379229  | 0.549289172  | 0.9995992 | 5.525590e-02  | 0.193428332 | 0.9546035 | 0.0996214488  | 6.529101e-02 |
| RAD23A             | -0.0001604779 | 9.985180e-01 | 9.990571e-01 | -0.0083543975 | 0.924662426  | 0.9995992 | -4.856640e-02 | 0.709242121 | 0.9546035 | -0.0075246357 | 5.337106e-01 |
| RAD23B             | 0.0450484421  | 4.160745e-01 | 7.920800e-01 | -0.0330634708 | 0.549381426  | 0.9995992 | 1.218891e-02  | 0.415439226 | 0.9546035 | -0.0161199151 | 6.106059e-01 |
| NAPA               | 0.0454025043  | 3.960043e-01 | 7.802736e-01 | 0.1292678632  | 0.014101449  | 0.9995992 | -1.388526e-02 | 0.601374159 | 0.9546035 | 0.1191244832  | 1.745189e-02 |
| E1F5               | 0.0572513529  | 5.178974e-01 | 8.218271e-01 | 0.0149029107  | 0.871571425  | 0.9995992 | -1.325331e-02 | 0.557980761 | 0.9546035 | -0.022359966  | 5.092835e-01 |
| PSMD4              | 0.0544375736  | 4.661306e-01 | 8.079413e-01 | -0.1553774136 | 0.938294523  | 0.9995992 | 4.597226e-02  | 0.273575234 | 0.9546035 | -0.0274015907 | 6.358992e-01 |
| APOC4              | 0.1251547240  | 7.872030e-01 | 9.267668e-01 | 0.4631940330  | 0.292397640  | 0.9995992 | 3.640019e-01  | 0.222394789 | 0.9546035 | 0.2471556184  | 2.452598e-01 |
| PLTP               | 0.0362456897  | 8.036836e-01 | 9.349783e-01 | -0.0453068228 | 0.754558959  | 0.9995992 | 2.125156e-01  | 0.075749449 | 0.9546035 | 0.0002686445  | 4.992490e-01 |
| CSE1L              | -0.1841623438 | 1.571487e-01 | 6.224838e-01 | 0.0762115879  | 0.559820577  | 0.9995992 | 5.881948e-02  | 0.325722390 | 0.9546035 | 0.1796884410  | 7.370626e-02 |
| VCP                | 0.2230394287  | 8.802727e-01 | 1.319384e-01 | 0.0121146523  | 0.865595052  | 0.9995992 | 6.645922e-02  | 0.178814234 | 0.9546035 | 0.0395021203  | 2.887805e-01 |
| ADK                | 0.3563191644  | 1.294139e-03 | 1.319384e-01 | 0.0222325913  | 0.844245315  | 0.9995992 | -2.967653e-02 | 0.597600802 | 0.9546035 | 0.0230516062  | 1.415595e-01 |
| CDH13              | 0.5309787335  | 2.069747e-01 | 6.65694e-01  | 0.7447688080  | 0.068650338  | 0.9995992 | 2.728535e-01  | 0.259507667 | 0.9546035 | -0.1673195150 | 6.424347e-01 |
| NPEPPS             | -0.2828440590 | 5.347977e-02 | 4.562264e-01 | -0.0127535346 | 0.931308313  | 0.9995992 | -2.119070e-02 | 0.555966947 | 0.9546035 | 0.1260521608  | 1.956192e-01 |
| SUMO3,UBE2D,2SUMO3 | 0.1234075464  | 1.038962e-01 | 5.362675e-01 | 0.0087157606  | 0.910064375  | 0.9995992 | 7.566568e-02  | 0.167840305 | 0.9546035 | 0.0557704843  | 2.277053e-01 |
| BID                | 0.1413347499  | 2.965699e-02 | 3.864738e-01 | -0.0796620784 | 0.213904605  | 0.9995992 | -6.758072e-02 | 0.842748535 | 0.9572213 | -0.1003186397 | 0.937329e-01 |
| E1F6               | -0.1411967828 | 1.303961e-01 | 5.816156e-01 | -0.1036255446 | 0.289652960  | 0.9995992 | -3.579568e-02 | 0.649487788 | 0.9546035 | -0.0491534183 | 6.795596e-01 |
| MTPN               | 0.1614042283  | 9.147198e-02 | 5.171548e-01 | 0.2152473526  | 0.025994516  | 0.9995992 | 1.018931e-01  | 0.146644467 | 0.9546035 | 0.129098263   | 1.087025e-01 |
| DEFA3              | 0.2907584436  | 1.606024e-01 | 6.285829e-01 | -0.0936289149 | 0.648964115  | 0.9995992 | -3.751399e-02 | 0.570508784 | 0.9546035 | 0.0649308049  | 3.776910e-01 |
| ARPC4              | -0.0445745682 | 6.037663e-01 | 8.419469e-01 | -0.0211722589 | 0.803919614  | 0.9995992 | -8.414554e-02 | 0.834225157 | 0.9572213 | 0.0159564889  | 4.241123e-01 |
| TP1                | 0.0953851716  | 1.237726e-01 | 5.737224e-01 | -0.0143910558 | 0.818548952  | 0.9995992 | -7.751147e-02 | 0.888363068 | 0.9579808 | -0.0017380940 | 5.107290e-01 |
| MYL6               | -0.3037107638 | 9.308381e-03 | 2.750827e-01 | -0.0281355061 | 0.819436860  | 0.9995992 | -3.630714e-02 | 0.618972892 | 0.9546035 | -0.0894481879 | 7.623619e-01 |
| ACTB               | 0.0195724915  | 7.323454e-01 | 8.93254e-01  | 0.0722953607  | 0.209042975  | 0.9995992 | -0.080766e-02 | 0.921255613 | 0.9644203 | -0.0133478192 | 5.026989e-01 |
| E1F4A1             | 0.0297593960  | 7.828086e-01 | 9.256765e-01 | -0.1032179148 | 0.349237676  | 0.9995992 | 2.930224e-01  | 0.002700023 | 0.9546035 | 0.0095211125  | 4.663882e-01 |
| PRPS1              | 0.0658702245  | 4.462982e-01 | 8.021362e-01 | 0.1187619339  | 0.179299683  | 0.9995992 | 1.160925e-01  | 0.093781595 | 0.9546035 | 0.1150033642  | 9.954216e-02 |
| PSMA6              | 0.1351249244  | 1.663520e-02 | 3.812782e-01 | -0.0197475164 | 0.73723812   | 0.9995992 | -5.266559e-05 | 0.500351943 | 0.9546035 | 0.0385599187  | 2.586570e-01 |
| CD42               | -0.0076968254 | 9.599545e-01 | 9.907192e-01 | -0.0133650474 | 0.920570836  | 0.9995992 | -7.782173e-02 | 0.711535374 | 0.9546035 | 0.1427799243  | 1.382227e-01 |
| OMF8               | -0.0923975031 | 5.176516e-01 | 8.216271e-01 | 0.0277564304  | 0.847980234  | 0.9995992 | 1.058784e-01  | 0.232570128 | 0.9546035 | 0.1519938475  | 1.571073e-01 |
| RAB2A              | 0.3801970928  | 8.146084e-02 | 5.027637e-01 | 0.3402557658  | 0.123189349  | 0.9995992 | -1.479621e-01 | 0.744654812 | 0.9546035 | 0.1798194821  | 2.096326e-01 |
| RAB5B              | -0.0631505581 | 4.050099e-01 | 7.850184e-01 | 0.1427644826  | 0.057884889  | 0.9995992 | 4.480652e-02  | 0.276544756 | 0.9546035 | 0.1554508310  | 2.067292e-02 |
| RAB10              | -0.3710807930 | 8.329412e-02 | 5.027637e-01 | 0.0003346808  | 0.998786086  | 0.9995992 | -1.758098e-02 | 0.531834606 | 0.9546035 | 0.2245664009  | 1.608490e-01 |
| UBE2D3,UBE2D2      | 0.0504260479  | 5.888150e-01 | 8.419469e-01 | 0.1594076884  | 0.005938565  | 0.9995992 | 1.561875e-03  | 0.493495605 | 0.9546035 | 0.1655760600  | 3.626189e-02 |
| UBE2M              | 0.1427340503  | 3.954155e-01 | 7.802736e-01 | -0.1399866684 | 0.435354672  | 0.9995992 | 3.029198e-01  | 0.036057862 | 0.9546035 | -0.0088590200 | 5.187804e-01 |
| UBE2K              | 0.0393866091  | 7.022193e-01 | 8.709582e-01 | 0.0506946233  | 0.632477626  | 0.9995992 | 1.035482e-03  | 0.496019763 | 0.9546035 | 0.0392695042  | 3.541707e-01 |
| UBE2N              | 0.0716309109  | 1.777061e-01 | 6.345879e-01 | 0.0086250384  | 0.868833342  | 0.9995992 | -6.594658e-02 | 0.887103699 | 0.9579808 | 0.0196750349  | 3.567797e-01 |
| RAB14              | 0.2603943515  | 2.327287e-01 | 6.697768e-01 | -0.0182775997 | 0.930582334  | 0.9995992 | 2.652316e-01  | 0.119132735 | 0.9546035 | 0.2599222092  | 1.125971e-01 |
| ACTR3              | 0.0374104040  | 6.526006e-01 | 8.523468e-01 | -0.0213380640 | 0.9797145374 | 0.9995992 | 2.120248e-02  | 0.400502723 | 0.9546035 | 0.0088047594  | 5.668653e-01 |
| ACTR2              | 0.1142781400  | 1.886670e-01 | 4.627328e-01 | -0.0406591826 | 0.638954632  | 0.9995992 | -7.830027e-02 | 0.813319015 | 0.9572213 | -0.0284445095 | 6.224321e-01 |
| ACTR1A             | 0.0135344905  | 8.787043e-01 | 9.651504e-01 | -0.0104037748 | 0.908480634  | 0.9995992 | 0.688338e-02  | 0.245471522 | 0.9546035 | 0.0036640584  | 4.844816e-01 |
| COPS2              | 0.1536466481  | 1.906722e-01 | 3.414766e-01 | 0.0071766570  | 0.930272601  | 0.9995992 | -7.710161e-02 | 0.870028283 | 0.9572213 | 0.0024675484  | 3.149693e-01 |
| ARF3,ARF1          | -0.0491993099 | 3.642752e-01 | 7.553917e-01 | -0.0540369511 | 0.317257104  | 0.9995992 | -6.196356e-02 | 0.869361071 | 0.9572213 | -0.0040435887 | 5.305114e-01 |
| RAP1B              | -0.3301632219 | 2.250912e-02 | 3.455296e-01 | 0.0594673702  | 0.688139492  | 0.9995992 | -2.698232e-02 |             |           |               |              |

|          |               |               |              |               |             |           |                |             |           |               |               |
|----------|---------------|---------------|--------------|---------------|-------------|-----------|----------------|-------------|-----------|---------------|---------------|
| FKBP4    | -0.1066968199 | 5.2117716e-01 | 8.216873e-01 | -0.0217878579 | 0.892922297 | 0.9995992 | -1.255395e-01  | 0.773192586 | 0.9572213 | 0.1191599796  | 2.203651e-01  |
| CFHR3    | -0.1242087181 | 2.434710e-01  | 5.268635e-01 | 0.0579642715  | 0.566928157 | 0.9995992 | 5.268650e-02   | 0.311773684 | 0.9546035 | -0.0565495918 | 6.912211e-01  |
| CFHR1    | -0.0894735923 | 4.722100e-01  | 8.125882e-01 | -0.1607458591 | 0.188364245 | 0.9995992 | -1.041975e-01  | 0.795416783 | 0.9572213 | -0.3265010396 | 9.952505e-01  |
| UBXN1    | 0.0365651810  | 6.762698e-01  | 8.610482e-01 | 0.0387134200  | 0.645261417 | 0.9995992 | -9.114723e-03  | 0.541224320 | 0.9546035 | 0.0137593843  | 4.326331e-01  |
| GBE1     | -0.0231282307 | 8.265774e-01  | 9.430642e-01 | 0.0436421113  | 0.687370749 | 0.9995992 | -4.145232e-02  | 0.652067296 | 0.9546035 | 0.0775162356  | 2.486608e-01  |
| HGFAC    | -0.1690489444 | 1.740488e-01  | 6.291668e-01 | -0.1318163715 | 0.283724693 | 0.9995992 | 3.678473e-04   | 0.498685361 | 0.9546035 | -0.0420615901 | 6.349148e-01  |
| GL01     | 0.2008689474  | 4.870294e-03  | 2.131357e-01 | 0.0457284757  | 0.534536944 | 0.9995992 | 7.679056e-02   | 0.150806393 | 0.9546035 | 0.1295717920  | 3.392774e-02  |
| YWHAH    | 0.1138939385  | 3.109593e-01  | 7.192836e-01 | -0.0035912263 | 0.975821724 | 0.9995992 | 8.357056e-02   | 0.236561089 | 0.9546035 | -0.1139548187 | 8.224211e-01  |
| PLP2     | -0.2712812332 | 5.461547e-01  | 8.281031e-01 | -0.0524774085 | 0.907189510 | 0.9995992 | -2.597999e-01  | 0.718490087 | 0.9546035 | 0.2958183579  | 2.576441e-01  |
| CLC      | -0.2745298569 | 3.333753e-01  | 7.337982e-01 | 0.3555068943  | 0.208649822 | 0.9995992 | -4.131672e-02  | 0.557836495 | 0.9546035 | -0.1527303699 | 6.942367e-01  |
| CALD1    | -0.2457610534 | 1.585174e-01  | 6.224839e-01 | -0.0187224621 | 0.916254389 | 0.9995992 | 2.362539e-02   | 0.447149308 | 0.9546035 | -0.0068333264 | 5.147598e-01  |
| ITIH3    | 0.0692743869  | 7.448141e-01  | 9.009472e-01 | -0.1005454479 | 0.831738976 | 0.9995992 | -2.287423e-01  | 0.856735600 | 0.9572213 | -0.4515243335 | 9.746749e-01  |
| PTPN11   | 0.1235677748  | 2.638743e-01  | 6.900429e-01 | 0.2685426151  | 0.015802455 | 0.9995992 | 1.381762e-01   | 0.103614537 | 0.9546035 | 0.2550533570  | 1.547331e-02  |
| PSME1    | 0.0666075307  | 3.189294e-01  | 7.225946e-01 | 0.0944964048  | 0.168628235 | 0.9995992 | -6.550396e-02  | 0.832762981 | 0.9572213 | 0.1095981430  | 6.554072e-02  |
| PRDX1    | 0.1736439472  | 1.022690e-02  | 2.878056e-01 | 0.0327444603  | 0.656007158 | 0.9995992 | 0.326209e-02   | 0.336827704 | 0.9546035 | 0.0350409358  | 3.145013e-01  |
| ARHGAP1  | -0.0385553822 | 6.933344e-01  | 8.660792e-01 | 0.0975372527  | 0.304022389 | 0.9995992 | 4.501036e-02   | 0.325908900 | 0.9546035 | 0.0718357297  | 2.254744e-01  |
| DHX9     | 0.0785143035  | 5.6111729e-01 | 8.323189e-01 | 0.0504177606  | 0.713049904 | 0.9995992 | 1.756954e-01   | 0.098178372 | 0.9546035 | 0.1381325301  | 1.644588e-01  |
| LGALS3BP | -0.2029052482 | 3.884249e-01  | 7.742297e-01 | -0.2221004023 | 0.351974696 | 0.9995992 | -1.476022e-01  | 0.732896240 | 0.9546035 | -0.6164281297 | 9.932663e-01  |
| DMTN     | 0.0825183332  | 1.712980e-01  | 6.287166e-01 | -0.0138467406 | 0.823832026 | 0.9995992 | -7.817878e-03  | 0.550116948 | 0.9546035 | 0.0290238970  | 3.207790e-01  |
| CD47     | -0.4455247153 | 3.515137e-01  | 7.498135e-01 | 0.0389736070  | 0.934621200 | 0.9995992 | 3.657266e-02   | 0.469656697 | 0.9546035 | 0.5700957312  | 1.265220e-01  |
| VAC14    | -0.1123850552 | 4.430735e-01  | 8.021362e-01 | -0.0877871283 | 0.569831810 | 0.9995992 | -1.312165e-01  | 0.811978246 | 0.9572213 | -0.0530974123 | 6.261650e-01  |
| AHNAK    | -0.1739821520 | 3.140319e-01  | 7.197712e-01 | -0.0182065093 | 0.916925271 | 0.9995992 | -1.090636e-01  | 0.733312601 | 0.9546035 | -0.0519910940 | 6.138682e-01  |
| AP1B1    | 0.1251949281  | 2.663184e-01  | 6.940168e-01 | -0.1225682299 | 0.291268611 | 0.9995992 | 9.636704e-02   | 0.196858538 | 0.9546035 | -0.0301607499 | 6.051004e-01  |
| EFEMP1   | -0.0783479369 | 5.443563e-01  | 8.281031e-01 | 0.0287392857  | 0.817814323 | 0.9995992 | -8.340335e-02  | 0.740296806 | 0.9546035 | -0.0364890065 | 6.097583e-01  |
| LMNA2    | -0.3711429224 | 3.641075e-01  | 7.553917e-01 | 0.0490824906  | 0.905968229 | 0.9995992 | -1.736454e-02  | 0.516783537 | 0.9546035 | 0.3367261219  | 2.085729e-01  |
| PTPRJ    | 0.2033610283  | 5.721470e-01  | 8.344560e-01 | -0.1091212705 | 0.767672269 | 0.9995992 | 4.233044e-02   | 0.454555201 | 0.9546035 | -0.1827970353 | 6.628396e-01  |
| COASY    | 0.1460531661  | 5.888118e-02  | 4.562264e-01 | 0.0063908861  | 0.934146790 | 0.9995992 | -7.810955e-02  | 0.843260225 | 0.9572213 | 0.0077041429  | 4.591205e-01  |
| GPS1     | -0.0078108992 | 9.067151e-01  | 9.710488e-01 | -0.0170361793 | 0.797938771 | 0.9995992 | 2.990459e-02   | 0.330622919 | 0.9546035 | 0.0595678935  | 1.997683e-01  |
| SPP2     | -0.3442486043 | 3.867452e-01  | 7.727636e-01 | -0.3730992412 | 0.379078122 | 0.9995992 | -4.146417e-01  | 0.854003887 | 0.9572213 | -0.3306026024 | 7.653025e-01  |
| MTAP     | -0.0734584552 | 2.232170e-01  | 6.697768e-01 | 0.0056471433  | 0.928887631 | 0.9995992 | -1.814529e-02  | 0.616254455 | 0.9546035 | -0.0191514941 | 6.180011e-01  |
| PSMD2    | 0.0882842597  | 0.085159e-01  | 8.419469e-01 | -0.2153842524 | 0.242192571 | 0.9995992 | -1.066263e-01  | 0.730603732 | 0.9546035 | -0.1816890341 | 6.177785e-01  |
| MNRN1    | -0.3497505184 | 3.942983e-02  | 4.198744e-01 | -0.2618537765 | 0.131302270 | 0.9995992 | -2.014033e-01  | 0.874518226 | 0.9572213 | -0.3616491892 | 8.802025e-01  |
| SELENBP1 | -0.0593280168 | 6.453283e-01  | 8.488673e-01 | 0.0050631713  | 0.968065616 | 0.9995992 | -3.872318e-02  | 0.616109105 | 0.9546035 | 0.0896887242  | 2.336620e-01  |
| SLC14A1  | -0.4389199060 | 4.604430e-01  | 8.069339e-01 | 0.1961075277  | 0.734735158 | 0.9995992 | -3.528420e-01  | 0.724987762 | 0.9546035 | 0.4564092734  | 2.161713e-01  |
| UBE2V1   | 0.0243508894  | 7.537057e-01  | 9.072100e-01 | -0.0186204598 | 0.816611232 | 0.9995992 | 0.349649e-02   | 0.350176319 | 0.9546035 | 0.0295736384  | 3.570263e-01  |
| ILK      | -0.1754711220 | 2.433562e-01  | 6.725635e-01 | -0.0904950306 | 0.553770010 | 0.9995992 | -8.064906e-02  | 0.699925019 | 0.9546035 | -0.1531301863 | 6.953254e-01  |
| PIN1     | 0.2632814888  | 1.009497e-03  | 1.319384e-01 | -0.0385099658 | 0.649788067 | 0.9995992 | -1.592248e-02  | 0.574955789 | 0.9546035 | -0.0164116084 | 5.7698882e-01 |
| EIEEBP1  | 0.3234612914  | 2.737957e-01  | 6.944775e-01 | -0.0051377816 | 0.986208531 | 0.9995992 | 3.702596e-01   | 0.111322222 | 0.9546035 | 0.2632922441  | 1.834560e-01  |
| DCTN2    | -0.1286869799 | 2.619392e-01  | 6.900429e-01 | -0.0796245659 | 0.486285454 | 0.9995992 | 1.855359e-02   | 0.045556040 | 0.9546035 | -0.0260719359 | 5.901018e-01  |
| NAO1     | 0.0781673570  | 4.276487e-01  | 7.973735e-01 | 0.0256674207  | 0.795188834 | 0.9995992 | -3.531267e-02  | 0.637102586 | 0.9546035 | 0.0900557597  | 1.891905e-01  |
| CUL1     | 0.2217996278  | 6.256598e-02  | 2.550103e-01 | 0.0291650916  | 0.733152305 | 0.9995992 | 5.460318e-02   | 0.263240959 | 0.9546035 | 0.1427801496  | 5.219331e-02  |
| CUL2     | 0.0470276778  | 6.4117015e-01 | 8.486349e-01 | -0.0324314622 | 0.754112390 | 0.9995992 | -1.673118e-02  | 0.564220957 | 0.9546035 | 0.0253474783  | 4.073603e-01  |
| CUL3     | -0.1055578152 | 1.720820e-01  | 6.287166e-01 | -0.1068776590 | 0.162514891 | 0.9995992 | -4.809886e-02  | 0.731805272 | 0.9546035 | -0.1044467405 | 9.120938e-01  |
| TSTA3    | 0.0808785527  | 4.136918e-01  | 7.920435e-01 | -0.0739151151 | 0.486189552 | 0.9995992 | -3.940423e-02  | 0.651042761 | 0.9546035 | -0.2177430435 | 9.765518e-01  |
| FHL1     | -0.4247534130 | 1.705445e-01  | 6.287166e-01 | -0.1957193605 | 0.552098726 | 0.9995992 | -3.648845e-01  | 0.879759456 | 0.9579808 | -0.1503421635 | 6.676547e-01  |
| APOF     | 0.0303140728  | 8.237004e-01  | 9.429827e-01 | -0.0302140787 | 0.819331064 | 0.9995992 | 6.267043e-02   | 0.326824364 | 0.9546035 | -0.0491772154 | 6.050058e-01  |
| BLMH     | 0.1051928847  | 1.275306e-01  | 5.775504e-01 | -0.0528198738 | 0.459908804 | 0.9995992 | -2.340050e-02  | 0.627828697 | 0.9546035 | -0.0735466884 | 8.426549e-01  |
| COTL1    | 0.1384394541  | 4.931277e-01  | 8.151018e-01 | 0.4483212427  | 0.021638129 | 0.9995992 | -6.896422e-02  | 0.629345977 | 0.9546035 | 0.3857494333  | 2.456735e-02  |
| HNRNPD   | 0.3703327734  | 6.129914e-02  | 4.562264e-01 | -0.1223589878 | 0.561047472 | 0.9995992 | -2.243022e-01  | 0.872394493 | 0.9572213 | -0.0408116921 | 5.720099e-01  |
| DSG2     | -1.6549915304 | 4.025104e-01  | 7.844497e-01 | -1.8579443896 | 0.378083040 | 0.9995992 | -1.564297e+00  | 0.780767724 | 0.9572213 | -1.9898023235 | 8.133699e-01  |
| TLL12    | 0.2073159166  | 5.532618e-02  | 4.582264e-01 | 0.1491892656  | 0.194887823 | 0.9995992 | -3.320026e-02  | 0.617855485 | 0.9546035 | 0.2104580675  | 2.6209187e-02 |
| DCTN1    | -0.0693706281 | 4.246677e-01  | 7.973735e-01 | -0.0774788149 | 0.542401668 | 0.9995992 | 1.135305e-01   | 0.184470019 | 0.9546035 | -0.0103108229 | 5.327314e-01  |
| EIF4A2   | 0.0524958728  | 6.661033e-01  | 8.576613e-01 | -0.0898114664 | 0.461258744 | 0.9995992 | 1.987285e-01   | 0.050930210 | 0.9546035 | 0.0764964315  | 2.601952e-01  |
| CTTN     | -0.1373879274 | 1.393691e-01  | 6.012201e-01 | -0.1298369750 | 0.170391093 | 0.9995992 | -1.359956e-02  | 0.558196772 | 0.9546035 | -0.0936634390 | 8.255008e-01  |
| FLOT2    | -0.3752512385 | 4.079166e-01  | 7.865537e-01 | -0.1031904550 | 0.821921059 | 0.9995992 | -3.5222630e-02 | 0.530886022 | 0.9546035 | 0.4474498685  | 1.658384e-01  |
| WFDC2    | 1.4142239543  | 4.909906e-02  | 4.562264e-01 | 0.8638734014  | 0.221641424 | 0.9995992 | 6.603403e-01   | 0.167807184 | 0.9546035 | 0.9994397564  | 6.876349e-02  |
| HABP2    | -0.2128120365 | 1.570559e-02  | 3.187282e-01 | -0.0720336882 | 0.421991959 | 0.9995992 | -0.782876e-02  | 0.622550488 | 0.9546035 | -0.1740097349 | 9.769102e-01  |
| PRPSA1   | 0.0410932183  | 6.165708e-01  | 8.419469e-01 | 0.0228288755  | 0.785317088 | 0.9995992 | 8.588894e-02   | 0.150714325 | 0.9546035 | 0.1126958914  | 6.893135e-02  |
| ITIH4    | -0.0560048678 | 5.617811e-01  | 8.323189e-01 | -0.1510758011 | 0.124877568 | 0.9995992 | -1.033526e-01  | 0.851676519 | 0.9572213 | -0.1967655995 | 8.819496e-01  |
| GANAB    | -0.1930894877 | 3.622384e-01  | 7.553917e-01 | 0.0554311305  | 0.796865397 | 0.9995992 | 1.725643e-01   | 0.209473116 | 0.9546035 | 0.3456981728  | 5.064105e-02  |
| PPP2R5D  | -0.1709011752 | 2.150798e-01  | 6.680462e-01 | -0.0250054836 | 0.854580658 | 0.9995992 | -1.417058e-01  | 0.841138046 | 0.9572213 | -0.0560217385 | 6.653184e-01  |
| LTBP1    | -0.4079135079 | 4.785755e-02  | 4.562264e-01 | -0.0159589892 | 0.939835062 | 0.9995992 | -3.492870e-01  | 0.950487331 | 0.9714819 | -0.1756046316 | 7.987174e-01  |
| ICAM4    | -0.4374879241 | 2.714366e-01  | 6.940168e-01 | 0.2251208719  | 0.567665980 | 0.9995992 | -1.245259e-02  | 0.512236033 | 0.9546035 | 0.0233352199  | 9.958509e-02  |
| LASP1    | 0.0578565466  | 4.997228e-01  | 8.151018e-01 | 0.0340414896  | 0.689830448 | 0.9995992 | -0.437386e-02  | 0.636573150 | 0.9546035 | -0.0231917745 | 6.044449e-01  |
| KPNB1    | 0.0340202603  | 8.487581e-01  | 5.910832e-01 | -0.1999187541 | 0.275882148 | 0.9995992 | -1.055177e-01  | 0.724       |           |               |               |



|             |               |              |              |               |             |           |               |             |           |               |              |
|-------------|---------------|--------------|--------------|---------------|-------------|-----------|---------------|-------------|-----------|---------------|--------------|
| NR2C2AP     | 0.2351447992  | 6.807919e-01 | 8.624823e-01 | 0.6781703607  | 0.239162991 | 0.9995992 | -1.964194e-01 | 0.635325902 | 0.9548035 | 0.0852952732  | 4.418388e-01 |
| CARM1       | -0.0241948448 | 8.108538e-01 | 9.384947e-01 | -0.0574194153 | 0.573915982 | 0.9995992 | -7.082692e-02 | 0.754885539 | 0.9548035 | -0.0483711302 | 6.764543e-01 |
| NT11        | 0.0408256068  | 4.973558e-01 | 8.151018e-01 | -0.0576792885 | 0.340316425 | 0.9995992 | -2.872145e-02 | 0.681004167 | 0.9548035 | -0.0204358210 | 6.310883e-01 |
| TREML1      | -0.5472645883 | 2.971073e-01 | 7.050235e-01 | 0.1193580925  | 0.823884151 | 0.9995992 | 6.822731e-01  | 0.102608719 | 0.9546035 | 0.8851837924  | 3.718209e-02 |
| KRTAP11-1   | 0.8912312077  | 1.650513e-01 | 6.287166e-01 | -0.1820832673 | 0.770117394 | 0.9995992 | 6.433199e-01  | 0.161520355 | 0.9548035 | 0.3639712437  | 2.795712e-01 |
| CRLF3       | 0.0556689231  | 4.445382e-01 | 8.021362e-01 | 0.0416385013  | 0.557514976 | 0.9995992 | 5.069287e-02  | 0.245759093 | 0.9548035 | 0.0578086857  | 2.179471e-01 |
| C9orf40     | -0.0527074822 | 5.581683e-01 | 8.319734e-01 | 0.0093697221  | 0.916887248 | 0.9995992 | 1.262125e-01  | 0.083511187 | 0.9546035 | 0.0581117807  | 2.565943e-01 |
| PNPLA6      | 0.1118050891  | 7.962048e-01 | 9.305665e-01 | -0.4137971837 | 0.346414494 | 0.9995992 | -3.141089e-01 | 0.767604678 | 0.9572213 | -0.7369862946 | 9.510796e-01 |
| OSCAR       | 0.4146391508  | 3.465175e-01 | 7.479692e-01 | 0.0716416232  | 0.871667425 | 0.9995992 | -1.487941e-01 | 0.627803693 | 0.9546035 | 0.1096338994  | 4.025905e-01 |
| ALDH16A1    | 0.2228236826  | 1.962739e-02 | 8.552396e-01 | 0.2061919377  | 0.037428873 | 0.9995992 | 9.836429e-02  | 0.160773149 | 0.9546035 | 0.2094467807  | 2.408455e-02 |
| SLC3A2      | -0.5799799723 | 2.893737e-01 | 6.994678e-01 | -0.5524055896 | 0.342457850 | 0.9995992 | -4.413320e-01 | 0.788956710 | 0.9572213 | -0.5496121232 | 6.095646e-01 |
| CISD2       | -0.0031332833 | 9.685428e-01 | 9.952791e-01 | -0.2758503491 | 0.216578790 | 0.9995992 | 1.448549e-01  | 0.255223979 | 0.9546035 | 0.0319890046  | 4.418989e-01 |
| CD177       | -3.4200184428 | 2.834870e-01 | 6.987920e-01 | -3.4756695707 | 0.288439593 | 0.9995992 | -2.226058e+00 | 0.800749773 | 0.9572213 | -3.0137333394 | 8.314779e-01 |
| SLC43A3     | -0.7715395117 | 1.408940e-01 | 6.058979e-01 | -0.3907001892 | 0.446636486 | 0.9995992 | -3.346208e-01 | 0.733149817 | 0.9546035 | -0.4364981386 | 8.009845e-01 |
| TXNDG5      | -0.3559372804 | 2.130129e-01 | 6.680462e-01 | -0.3954692237 | 0.188868022 | 0.9995992 | 8.437929e-04  | 0.498844048 | 0.9546035 | -0.0614923535 | 5.862769e-01 |
| NAXE        | 0.2275501225  | 2.291146e-01 | 6.697768e-01 | 0.2030958472  | 0.274669731 | 0.9995992 | 2.072250e-01  | 0.140143259 | 0.9546035 | 0.1649795497  | 1.772574e-01 |
| MAPK11P1L   | -0.1013643335 | 4.322643e-01 | 7.997328e-01 | -0.1442492871 | 0.256142434 | 0.9995992 | 5.162551e-02  | 0.349335819 | 0.9546035 | -0.0082668805 | 5.254691e-01 |
| RFESD       | 0.0409547872  | 6.250770e-01 | 8.423326e-01 | -0.0017381717 | 0.983968460 | 0.9995992 | 5.506880e-02  | 0.261025338 | 0.9546035 | -0.0616407910 | 7.541293e-01 |
| UBA3        | -0.2875580409 | 1.583160e-01 | 8.423848e-01 | -0.1314064493 | 0.547056760 | 0.9995992 | -6.449886e-02 | 0.622229226 | 0.9546035 | -0.1984371875 | 6.046792e-01 |
| RDH11       | -2.0455937756 | 7.191663e-02 | 4.764992e-01 | -0.3886730870 | 0.701917693 | 0.9995992 | -2.611034e-01 | 0.605212402 | 0.9546035 | -0.1368799681 | 5.507266e-01 |
| LRRCC20     | 0.0030207408  | 9.803258e-01 | 9.936282e-01 | 0.0562999818  | 0.639119104 | 0.9995992 | 1.889286e-01  | 0.061447768 | 0.9546035 | 0.2034396759  | 5.270163e-02 |
| DCAF11      | 0.1134319315  | 3.941099e-01 | 7.802736e-01 | 0.0698865493  | 0.609919810 | 0.9995992 | 3.709839e-02  | 0.392062588 | 0.9546035 | 0.0616348996  | 3.299001e-01 |
| RAF2B       | -0.1059172295 | 6.435936e-01 | 8.486349e-01 | 0.0722031873  | 0.754339832 | 0.9995992 | -2.470282e-01 | 0.863477873 | 0.9572213 | 0.1512467560  | 2.517666e-01 |
| PDCDC6IP    | -0.0696813237 | 2.538236e-01 | 6.818625e-01 | -0.0290486118 | 0.639688452 | 0.9995992 | 6.426982e-02  | 0.150486744 | 0.9546035 | 0.0111042315  | 4.292728e-01 |
| NUDCD2      | 0.1257823237  | 8.328650e-02 | 5.027937e-01 | 0.0172132113  | 0.816057319 | 0.9995992 | 7.242302e-02  | 0.137018201 | 0.9546035 | 0.0249158218  | 3.789055e-01 |
| SCFD1       | -0.1726541559 | 4.600265e-01 | 8.069339e-01 | -0.0294436802 | 0.902739656 | 0.9995992 | -2.701057e-02 | 0.544827407 | 0.9546035 | -0.1349594674 | 7.124423e-01 |
| UBE2O2      | -0.1473069825 | 6.725972e-01 | 8.576613e-01 | -0.0352714887 | 0.919075004 | 0.9995992 | -4.879651e-01 | 0.917767864 | 0.9644203 | -0.0616407910 | 7.541293e-01 |
| PCNP        | -0.1915630085 | 2.016150e-01 | 6.638130e-01 | -0.0225790959 | 0.884496908 | 0.9995992 | 9.881272e-03  | 0.474242106 | 0.9546035 | -0.0143938335 | 5.364755e-01 |
| DNAJA4      | -0.0225202212 | 8.205996e-01 | 9.407844e-01 | -0.0009187131 | 0.992474340 | 0.9995992 | 4.027075e-02  | 0.344778839 | 0.9546035 | 0.0794248654  | 2.146171e-01 |
| DNAJC9      | -0.8310326758 | 5.354709e-02 | 4.562264e-01 | 0.2189984895  | 0.590234140 | 0.9995992 | 4.325850e-01  | 0.157703961 | 0.9546035 | 0.1799770987  | 3.274878e-01 |
| ATGA4       | -0.0681563868 | 8.367501e-01 | 9.500766e-01 | 0.2671494151  | 0.393392900 | 0.9995992 | -2.954298e-01 | 0.812314757 | 0.9572213 | -0.1062910632 | 6.255040e-01 |
| LZIC        | -0.1322236411 | 2.801399e-01 | 6.987920e-01 | -0.0074800172 | 0.950964314 | 0.9995992 | 1.133551e-01  | 0.182881101 | 0.9546035 | 0.0494414242  | 3.473507e-01 |
| CFHR4       | -0.3839678690 | 1.009355e-01 | 5.314990e-01 | 0.1424003005  | 0.551355577 | 0.9995992 | -1.599266e-01 | 0.747291719 | 0.9546035 | -0.2338376245 | 8.317968e-01 |
| PIEZO1      | -0.0876677487 | 8.564528e-01 | 9.541256e-01 | -0.0020101842 | 0.996572082 | 0.9995992 | -1.987699e-01 | 0.658204484 | 0.9546035 | 0.5822154279  | 1.005760e-01 |
| PSMF1       | -0.0770404489 | 3.190932e-01 | 7.225946e-01 | -0.0179279072 | 0.817057824 | 0.9995992 | 1.332841e-01  | 0.043814467 | 0.9546035 | 0.1105053653  | 7.686266e-02 |
| NRGN        | -0.8118077275 | 9.188030e-02 | 5.171548e-01 | -0.5318154563 | 0.288107042 | 0.9995992 | -2.637406e-02 | 0.521908472 | 0.9546035 | -0.0540460464 | 5.451568e-01 |
| KRT35       | -0.5986957729 | 5.365529e-01 | 8.281031e-01 | -1.4816468885 | 0.173396842 | 0.9995992 | -5.386179e-01 | 0.711568821 | 0.9546035 | -1.0962603963 | 8.354438e-01 |
| STM         | -0.1362520135 | 5.145593e-01 | 8.185856e-01 | -0.4363685118 | 0.042605680 | 0.9995992 | 2.315725e-03  | 0.495608625 | 0.9546035 | -0.0244387592 | 5.462171e-01 |
| GQH         | -0.3270183184 | 6.552213e-01 | 8.524806e-01 | -0.1451114609 | 0.842031037 | 0.9995992 | 1.089008e+00  | 0.091026440 | 0.9546035 | -1.3816480697 | 9.490969e-01 |
| HAS1        | 0.0923888715  | 3.780213e-01 | 7.647396e-01 | 0.1226353954  | 0.250663946 | 0.9995992 | -1.055932e-01 | 0.842078007 | 0.9572213 | 0.0423450005  | 3.517659e-01 |
| COP55       | 0.4751343974  | 1.543025e-03 | 1.319384e-01 | 0.0266380238  | 0.867477067 | 0.9995992 | 3.780245e-05  | 0.499905096 | 0.9546035 | 0.0423396849  | 3.982042e-01 |
| PRG4        | -0.5745701777 | 8.122379e-03 | 2.618209e-01 | -0.395502849  | 0.084766281 | 0.9995992 | -1.546909e-01 | 0.755929664 | 0.9546035 | -0.5191020348 | 9.861795e-01 |
| TNP01       | -0.134165284  | 3.154327e-01 | 7.197712e-01 | 0.0095961176  | 0.941544969 | 0.9995992 | 1.236810e-01  | 0.179901479 | 0.9546035 | 0.0937514855  | 2.297861e-01 |
| USP9X       | 0.0596300325  | 4.716171e-01 | 8.125882e-01 | -0.0975950117 | 0.242524346 | 0.9995992 | 1.030112e-03  | 0.495101314 | 0.9546035 | 0.0285159973  | 3.724596e-01 |
| USP7        | -0.1156819854 | 4.378036e-02 | 8.021362e-01 | -0.0929032544 | 0.870986449 | 0.9995992 | -2.718393e-02 | 0.571968008 | 0.9546035 | 0.0500209539  | 6.399976e-01 |
| ATP2A3      | -0.8989340650 | 4.171744e-02 | 4.250863e-01 | -0.1230963016 | 0.780786808 | 0.9995992 | -1.061338e-01 | 0.596081521 | 0.9546035 | 0.0994582198  | 4.134396e-01 |
| OSBP2       | 0.0425045680  | 8.426824e-01 | 9.500891e-01 | 0.4239880224  | 0.039524533 | 0.9995992 | -1.847524e-01 | 0.802903172 | 0.9572213 | 0.1536840579  | 2.300402e-01 |
| WBP2        | 0.0137960515  | 8.659839e-01 | 9.584204e-01 | 0.0358524238  | 0.670539523 | 0.9995992 | 8.691372e-02  | 0.149753663 | 0.9546035 | -0.0584738228 | 7.585781e-01 |
| PSMG2       | -0.0103004699 | 9.327947e-01 | 9.813741e-01 | -0.0632960647 | 0.599963883 | 0.9995992 | -1.690004e-01 | 0.917771856 | 0.9644203 | -0.2372195906 | 9.772998e-01 |
| RPE         | 0.2628092091  | 6.781641e-02 | 4.639407e-01 | 0.1919068577  | 0.188258511 | 0.9995992 | -5.809636e-02 | 0.653461391 | 0.9546035 | -0.0346147911 | 5.899556e-01 |
| AIDA        | -0.1728513740 | 4.888877e-01 | 8.151018e-01 | 0.3320757033  | 0.177171001 | 0.9995992 | 4.055709e-02  | 0.436180858 | 0.9546035 | 0.2827754348  | 1.183313e-01 |
| EFHD2:EFHD1 | 1.3928753461  | 1.223039e-02 | 3.084914e-01 | -0.0674508123 | 0.895684748 | 0.9995992 | 1.282076e-01  | 0.402198656 | 0.9546035 | 0.3159264246  | 2.668177e-01 |
| AP2M1       | 0.0140222455  | 8.946227e-01 | 9.687085e-01 | -0.1319220119 | 0.207330640 | 0.9995992 | 4.908427e-02  | 0.322853231 | 0.9546035 | -0.1152359413 | 8.646602e-01 |
| CMBL        | 0.0147345837  | 1.913687e-01 | 9.722363e-01 | 0.1441566006  | 0.279633840 | 0.9995992 | 1.324716e-01  | 0.163857286 | 0.9546035 | 0.2588470230  | 2.094751e-02 |
| DAZAP1      | -0.0150234549 | 8.885957e-01 | 9.687085e-01 | 0.1161237687  | 0.277315776 | 0.9995992 | 1.289994e-01  | 0.117518401 | 0.9546035 | 0.1552286194  | 9.082466e-02 |
| CNR1P1      | 0.0568311563  | 7.637919e-01 | 9.146931e-01 | 0.2375159064  | 0.200055037 | 0.9995992 | -1.736186e-01 | 0.814874300 | 0.9572213 | 0.2466870148  | 8.257085e-02 |
| DYNNL2      | -0.0661786664 | 3.964741e-01 | 7.802736e-01 | -0.0123994115 | 0.878282259 | 0.9995992 | -9.957382e-02 | 0.894148693 | 0.9579808 | -0.0893668045 | 6.849326e-01 |
| OTUB1       | -0.0077130813 | 9.206436e-01 | 9.747789e-01 | -0.0313356963 | 0.865418068 | 0.9995992 | 6.679922e-02  | 0.205675068 | 0.9546035 | 0.0244710846  | 3.780320e-01 |
| PGM2        | -0.1074824559 | 6.429026e-01 | 8.486349e-01 | 0.0027285833  | 0.990643090 | 0.9995992 | 3.909539e-02  | 0.434503490 | 0.9546035 | 0.1431029575  | 2.771345e-01 |
| PDPX        | 0.0884491705  | 9.581515e-02 | 5.292220e-01 | 0.0103535614  | 0.846043731 | 0.9995992 | -4.628376e-02 | 0.799414570 | 0.9572213 | 0.0318910485  | 2.746102e-01 |
| DCUN1D1     | -0.0088522209 | 9.260334e-01 | 9.771056e-01 | -0.107665816  | 0.239644587 | 0.9995992 | 5.393949e-02  | 0.288283552 | 0.9546035 | -0.0774261875 | 7.937086e-01 |
| GMPPA       | 0.2411442505  | 4.276944e-01 | 7.973732e-01 | -0.0246250682 | 0.939064520 | 0.9995992 | -1.762886e-01 | 0.817948202 | 0.9572213 | -0.3401260727 | 8.379682e-01 |
| ABHD14B     | -0.0149536903 | 8.409357e-01 | 9.500891e-01 | -0.0227885588 | 0.755542877 | 0.9995992 | -1.983036e-02 | 0.601516770 | 0.9546035 | 0.0215700219  | 3.788860e-01 |
| CPB2        | -0.3787875109 | 6.464010e-04 | 1.319384e-01 | -0.1054584572 | 0.365797810 | 0.9995992 | -1.608861e-01 | 0.922389440 | 0.9644203 | -0.2643983113 | 9.899623e-01 |
| USP47       | 0.1713290835  | 2.217388e-01 |              |               |             |           |               |             |           |               |              |



|           |                |              |              |                |              |           |               |             |           |               |              |
|-----------|----------------|--------------|--------------|----------------|--------------|-----------|---------------|-------------|-----------|---------------|--------------|
| NANS      | 0.0660175437   | 5.713731e-01 | 8.344560e-01 | -0.0290697306  | 0.801040211  | 0.9995992 | 3.812054e-02  | 0.375046012 | 0.9546035 | 0.0705967022  | 2.674514e-01 |
| SH3GLB2   | -0.0210851067  | 8.637461e-01 | 9.568396e-01 | -0.0104794174  | 0.909943825  | 0.9995992 | 2.663007e-02  | 0.416215368 | 0.9546035 | -0.0276188018 | 5.686053e-01 |
| HEBP1     | 0.0905231824   | 4.305423e-01 | 7.991327e-01 | -0.0089031112  | 0.938677308  | 0.9995992 | -1.695663e-01 | 0.924700484 | 0.9644203 | -0.1186532930 | 8.637958e-01 |
| RA66B     | -0.2002830954  | 2.291806e-01 | 6.697768e-01 | -0.0669702723  | 0.691130810  | 0.9995992 | 6.630474e-02  | 0.347222868 | 0.9546035 | -0.0844788773 | 6.858611e-01 |
| PHPT1     | -0.1256109515  | 4.269072e-01 | 7.973732e-01 | -0.0751610530  | 0.635848218  | 0.9995992 | -9.319132e-02 | 0.718637739 | 0.9546035 | -0.0788579306 | 6.901038e-01 |
| FAM114A2  | -0.0930216082  | 2.626441e-01 | 6.900429e-01 | 0.0277902396   | 0.738569937  | 0.9995992 | -4.319944e-02 | 0.694894774 | 0.9546035 | -0.0361276200 | 6.711840e-01 |
| LANCL2    | 0.1331089937   | 2.057064e-01 | 6.658594e-01 | -0.0662406953  | 0.539167891  | 0.9995992 | -5.982488e-02 | 0.707942796 | 0.9546035 | 0.0168898866  | 4.394476e-01 |
| KRT82     | 0.0577554828   | 9.149498e-01 | 9.738869e-01 | 0.5244695328   | 0.334117091  | 0.9995992 | -1.419749e+00 | 0.994120415 | 0.9949622 | -0.6283928712 | 8.742196e-01 |
| ATG3      | 0.2189331750   | 1.528176e-01 | 6.224838e-01 | -0.0038027965  | 0.980501436  | 0.9995992 | 6.992984e-02  | 0.328638948 | 0.9546035 | -0.0043350383 | 5.112401e-01 |
| SACM1L    | -0.5743426696  | 1.805238e-01 | 6.347267e-01 | -0.1169243225  | 0.785465380  | 0.9995992 | 7.082932e-02  | 0.434564813 | 0.9546035 | 0.3380933286  | 2.092580e-01 |
| OLA1      | 0.0908003979   | 1.795709e-01 | 6.347267e-01 | -0.0555236647  | 0.416519013  | 0.9995992 | 3.016179e-03  | 0.482899192 | 0.9546035 | -0.0286705143 | 6.588450e-01 |
| CYRIB     | 0.0509491767   | 8.142475e-01 | 9.398834e-01 | 0.0364683247   | 0.866203830  | 0.9995992 | -1.671300e-01 | 0.776024636 | 0.9572213 | 0.1221574787  | 2.906691e-01 |
| PNPO      | 0.1204316759   | 6.423522e-01 | 8.486349e-01 | -0.1408385635  | 0.568142543  | 0.9995992 | -5.545649e-01 | 0.981837539 | 0.9860085 | -0.3431436558 | 0.956355e-01 |
| CZIB      | -0.0561251214  | 5.822804e-01 | 8.397024e-01 | 0.0421761897   | 0.682391659  | 0.9995992 | 1.251552e-01  | 0.113343682 | 0.9546035 | 0.0890699124  | 1.889777e-01 |
| THG1L     | 0.0847830501   | 4.339751e-01 | 8.014978e-01 | -0.1240158908  | 0.251994832  | 0.9995992 | -3.635795e-02 | 0.629154107 | 0.9546035 | 0.0455365929  | 3.384749e-01 |
| ADPRS     | 0.0742728225   | 7.857626e-01 | 9.267668e-01 | -0.0210144871  | 0.937405673  | 0.9995992 | -0.790840e-01 | 0.915430633 | 0.9644203 | -0.6100737996 | 9.714248e-01 |
| DPP3      | 0.0372336875   | 6.409320e-01 | 8.486349e-01 | 0.0843691730   | 0.281201051  | 0.9995992 | -2.017751e-02 | 0.601478194 | 0.9546035 | 0.1559443399  | 2.073595e-02 |
| AHSP      | -0.0093737713  | 9.586378e-01 | 9.912589e-01 | 0.2073588084   | 0.258281224  | 0.9995992 | -8.288357e-02 | 0.673928207 | 0.9546035 | 0.0449517584  | 4.066001e-01 |
| C1RL      | -0.1826943738  | 4.608694e-02 | 4.562264e-01 | -0.0369549417  | 0.703641968  | 0.9995992 | -7.173926e-02 | 0.773224811 | 0.9572213 | -0.1859748522 | 9.728990e-01 |
| KCMF1     | -0.0505691153  | 9.659808e-01 | 9.923248e-01 | -0.1867938382  | 0.165490382  | 0.9995992 | -2.163205e-01 | 0.947263778 | 0.9707604 | -0.1059554746 | 7.705606e-01 |
| VAPA      | -0.4763842713  | 2.488525e-01 | 6.760373e-01 | -0.1914904049  | 0.646097883  | 0.9995992 | 1.285461e-01  | 0.378294291 | 0.9546035 | 0.3738428572  | 1.817842e-01 |
| ABRACL    | -0.1446034701  | 5.632853e-01 | 8.323189e-01 | -0.0405711395  | 0.872935444  | 0.9995992 | -1.641316e-01 | 0.740838438 | 0.9546035 | 0.1942169151  | 2.194817e-01 |
| ANKFY1    | 0.1168283789   | 1.110687e-01 | 5.470133e-01 | 0.0049473885   | 0.948546450  | 0.9995992 | 3.478056e-02  | 0.323781775 | 0.9546035 | 0.0657989517  | 2.022609e-01 |
| GMPR2     | 0.0290591051   | 7.373488e-01 | 8.978931e-01 | -0.0195830633  | 0.821004871  | 0.9995992 | -6.757054e-03 | 0.530397108 | 0.9546035 | -0.0302679103 | 6.357902e-01 |
| GRHPR     | -0.1861406854  | 1.174934e-01 | 5.618203e-01 | 0.1104740029   | 0.937405673  | 0.9995992 | 1.546301e-01  | 0.096179282 | 0.9546035 | 0.0593986638  | 3.085410e-01 |
| PEF1      | 0.0876990414   | 5.713236e-01 | 8.344560e-01 | -0.0995858969  | 0.513649539  | 0.9995992 | -1.935806e-02 | 0.549637452 | 0.9546035 | -0.0151753897 | 5.387990e-01 |
| BIN2      | -0.5169687335  | 6.379315e-02 | 4.597775e-01 | 0.2583754449   | 0.3939722025 | 0.9995992 | -3.519487e-01 | 0.902808419 | 0.9877777 | 0.0635571741  | 4.046346e-01 |
| COP5TA    | 0.2691802642   | 1.675145e-01 | 6.287166e-01 | 0.1775400228   | 0.371451138  | 0.9995992 | 1.356978e-01  | 0.246857378 | 0.9546035 | 0.3325527224  | 5.253061e-02 |
| SEC14L4   | 0.0981794593   | 4.622048e-01 | 8.068396e-01 | 0.1231770748   | 0.362050690  | 0.9995992 | -1.644890e-01 | 0.887208987 | 0.9579808 | -0.0979779270 | 7.741527e-01 |
| FETUB     | -0.1959956113  | 6.114133e-02 | 4.562264e-01 | -0.0122805682  | 0.908030169  | 0.9995992 | 4.581716e-02  | 0.338752200 | 0.9546035 | -0.0809034366 | 7.897234e-01 |
| PCYOX1    | -0.5344763874  | 1.359092e-03 | 1.319384e-01 | -0.1813814340  | 0.263004097  | 0.9995992 | 4.320068e-02  | 0.403130090 | 0.9546035 | -0.1154809469 | 7.460390e-01 |
| PFDN2     | -0.2469131020  | 5.409317e-01 | 8.287031e-01 | 0.8980742830   | 0.031978780  | 0.9995992 | 3.073795e-01  | 0.229430873 | 0.9546035 | 0.5908185589  | 8.387749e-02 |
| NRBP1     | 0.0961572548   | 7.139066e-01 | 8.808320e-01 | -0.1546954449  | 0.566406871  | 0.9995992 | -1.490097e-01 | 0.706527028 | 0.9546035 | -0.0302032283 | 5.446311e-01 |
| ENDPH1    | 0.0679814803   | 7.716402e-01 | 9.203620e-01 | 0.1935070746   | 0.420361885  | 0.9995992 | -2.059262e-01 | 0.812777970 | 0.9572213 | 0.0101683242  | 4.835871e-01 |
| XP07      | 0.0887648466   | 3.587479e-01 | 7.553917e-01 | -0.05771771313 | 0.560986440  | 0.9995992 | 5.847481e-02  | 0.277428720 | 0.9546035 | -0.0467779510 | 6.782003e-01 |
| DBNL      | -0.09605030585 | 2.294836e-01 | 6.697768e-01 | 0.0941796638   | 0.237876531  | 0.9995992 | 3.541003e-04  | 0.498256830 | 0.9546035 | 0.0743921432  | 1.842654e-01 |
| SERPINA10 | -0.0992856085  | 3.988091e-01 | 7.710597e-01 | -0.0020995508  | 0.983971062  | 0.9995992 | 6.632054e-02  | 0.268851153 | 0.9546035 | -0.0128122183 | 5.510304e-01 |
| NUDT5     | 0.1799398189   | 1.746692e-02 | 3.225921e-01 | 0.0011911722   | 0.987754672  | 0.9995992 | 1.070833e-01  | 0.087465395 | 0.9546035 | 0.0437161991  | 2.896547e-01 |
| AG02      | 0.0282837571   | 6.177161e-01 | 8.419469e-01 | -0.0313541375  | 0.572579990  | 0.9995992 | -7.446478e-02 | 0.900758122 | 0.9579808 | 0.0204846708  | 6.611583e-01 |
| RA821     | 0.2079797130   | 3.784777e-01 | 7.647336e-01 | -0.3744117082  | 0.124517384  | 0.9995992 | 9.709272e-02  | 0.344669441 | 0.9546035 | 0.0913710509  | 3.489061e-01 |
| PSME2     | 0.0126854729   | 8.605926e-01 | 9.551688e-01 | -0.0079393890  | 0.913623611  | 0.9995992 | -7.009190e-02 | 0.830691659 | 0.9572213 | -0.0009480472 | 5.050639e-01 |
| DNPEP     | 0.1145745774   | 1.360073e-01 | 5.932128e-01 | 0.0005980474   | 0.994061880  | 0.9995992 | 3.024714e-02  | 0.350207251 | 0.9546035 | 0.0381881744  | 3.213465e-01 |
| MCST1     | -0.0132810419  | 9.037912e-01 | 9.710486e-01 | -0.0629546995  | 0.565270716  | 0.9995992 | -7.964799e-02 | 0.759495119 | 0.9599168 | -0.0002639211 | 5.006972e-01 |
| ASAP1     | -0.1897690867  | 8.844938e-04 | 5.150107e-01 | -0.0283753919  | 0.805608166  | 0.9995992 | 8.654373e-02  | 0.194911576 | 0.9546035 | 0.0708288083  | 2.637903e-01 |
| TBC1D24   | 0.6712757218   | 1.843098e-04 | 7.261804e-02 | 0.2730102011   | 0.141512791  | 0.9995992 | 1.741508e-01  | 0.182424614 | 0.9546035 | 0.2706276744  | 7.612711e-02 |
| CORO1C    | -0.3706766324  | 2.727242e-02 | 3.705288e-01 | -0.2931393382  | 0.097225412  | 0.9995992 | -3.112706e-01 | 0.967742829 | 0.9774190 | -0.4229235227 | 9.899974e-01 |
| PSMD13    | 0.0287033934   | 7.592586e-01 | 9.118018e-01 | -0.1235585824  | 0.185267125  | 0.9995992 | -6.744335e-02 | 0.761290814 | 0.9561721 | 0.0568386181  | 2.823296e-01 |
| COPS3     | 0.1128021581   | 3.781777e-02 | 4.126470e-01 | 0.0280547710   | 0.637971807  | 0.9995992 | -5.107668e-02 | 0.820249251 | 0.9572213 | 0.0115373731  | 4.171228e-01 |
| MINPP1    | 0.0980387104   | 4.396397e-01 | 8.021362e-01 | -0.1404230846  | 0.255047580  | 0.9995992 | -4.711932e-02 | 0.641464136 | 0.9546035 | -0.1539395155 | 0.820483e-01 |
| NSFL1C    | 0.0201855208   | 7.607048e-01 | 9.119200e-01 | -0.0402429904  | 0.542846547  | 0.9995992 | 6.882347e-03  | 0.459725312 | 0.9546035 | -0.0311667796 | 8.280731e-01 |
| PPRPR1    | -0.1240677514  | 6.592447e-02 | 4.639407e-01 | 0.0538054224   | 0.424244821  | 0.9995992 | -1.100401e-02 | 0.562072368 | 0.9546035 | -0.0115929980 | 5.684488e-01 |
| PA2G4     | -0.3660083935  | 8.409669e-02 | 5.027637e-01 | -0.0938254746  | 0.664469158  | 0.9995992 | -1.049379e-01 | 0.684719423 | 0.9546035 | -0.2016468326 | 8.228347e-01 |
| RUVBL2    | 0.0504046484   | 6.960723e-01 | 8.669731e-01 | -0.1157667341  | 0.356292251  | 0.9995992 | 2.102375e-02  | 0.437154349 | 0.9546035 | 0.0168531107  | 4.473033e-01 |
| RUVBL1    | 0.1250467767   | 3.861135e-01 | 7.727639e-01 | -0.1381717064  | 0.326703849  | 0.9995992 | 6.742599e-02  | 0.325501987 | 0.9546035 | -0.0055913662 | 5.157890e-01 |
| ST3GAL6   | -0.0889503492  | 6.898427e-01 | 8.660792e-01 | -0.0272159725  | 0.901928034  | 0.9995992 | 1.915171e-01  | 0.197165637 | 0.9546035 | 0.1203626610  | 2.965343e-01 |
| CARHSP1   | 0.0592995847   | 5.040772e-01 | 8.151018e-01 | -0.0120641861  | 0.893779156  | 0.9995992 | 4.524764e-02  | 0.303461693 | 0.9546035 | 0.0869282817  | 1.760188e-01 |
| PRG3      | -0.5057513078  | 9.340806e-02 | 5.196358e-01 | 0.0451277090   | 0.883225920  | 0.9995992 | -1.683614e-01 | 0.710435241 | 0.9546035 | -0.2311714505 | 7.605532e-01 |
| SUGT1     | 0.1986329876   | 1.649197e-01 | 6.287166e-01 | 0.0855840562   | 0.557274843  | 0.9995992 | 4.553502e-02  | 0.373027307 | 0.9546035 | 0.1183035198  | 2.131262e-01 |
| DERA      | 0.3367136050   | 1.226558e-02 | 3.084914e-01 | 0.2607781553   | 0.057638014  | 0.9995992 | -1.487732e-01 | 0.855498175 | 0.9572213 | 0.2748152161  | 2.410686e-02 |
| REX02     | -0.0173381631  | 8.685865e-01 | 9.586081e-01 | -0.0910678262  | 0.375748218  | 0.9995992 | -4.763413e-02 | 0.672063073 | 0.9546035 | -0.1229781366 | 8.883569e-01 |
| UFC1      | -0.0899763877  | 2.035638e-01 | 6.646753e-01 | -0.0139119793  | 0.848076520  | 0.9995992 | -2.592821e-02 | 0.637991686 | 0.9546035 | 0.0332139750  | 3.248539e-01 |
| FBX07     | 0.0828513203   | 3.076460e-01 | 7.186513e-01 | 0.0128780874   | 0.876914492  | 0.9995992 | 1.321000e-01  | 0.052327699 | 0.9546035 | 0.1254062276  | 6.474413e-02 |
| TLN1      | -0.2619028944  | 6.175654e-02 | 4.562264e-01 | -0.0145904980  | 0.918090825  | 0.9995992 | -9.876067e-02 | 0.754122798 | 0.9546035 | -0.0188528995 | 5.523440e-01 |
| USP15     | 0.0813538290   | 2.491410e-01 | 6.760373e-01 | -0.0516094816  | 0.460688212  | 0.9995992 | -2.650101e-02 | 0.642768703 | 0.9546035 | -0.0291637064 | 6.568214e-01 |
| PPME1     | 0.1470975937   | 8.895879e-02 | 5.154377e-01 | -0.0201863938  | 0.820765727  | 0.9995992 | -5.327679e-0  |             |           |               |              |



| SHRM                                                          | SRF           | SRF                                 | SRF                                                         | SRF           | DiabMelittus          | DiabMelittus                                  | DiabMelittus  | AHn                   | AHn                                           | AHn           | Activesmoking         | Activesmoking                                 |
|---------------------------------------------------------------|---------------|-------------------------------------|-------------------------------------------------------------|---------------|-----------------------|-----------------------------------------------|---------------|-----------------------|-----------------------------------------------|---------------|-----------------------|-----------------------------------------------|
| Adj. p-val. (1-sided test, SHRM > no SHRM, Benjamini-H. cor.) | AVG.Log.Ratio | p-val. (1-sided test, SRF > no SRF) | Adj. p-val. (1-sided test, SRF > no SRF, Benjamini-H. cor.) | AVG.Log.Ratio | p-val. (2-sided test) | Adj. p-val. (2-sided test, Benjamini-H. cor.) | AVG.Log.Ratio | p-val. (2-sided test) | Adj. p-val. (2-sided test, Benjamini-H. cor.) | AVG.Log.Ratio | p-val. (2-sided test) | Adj. p-val. (2-sided test, Benjamini-H. cor.) |
| 0.93650941                                                    | -2.746462e-01 | 8.107420e-01                        | 0.9997779456                                                | -0.0782252642 | 0.8295796153          | 0.96048889                                    | -3.812821e-02 | 0.890930057           | 0.9982883                                     | -2.730476e-01 | 0.4758576943          |                                               |
| 0.79213004                                                    | 5.281618e-02  | 3.826782e-01                        | 0.9997779456                                                | -0.2222212001 | 0.4049598794          | 0.89501894                                    | -1.938906e-01 | 0.379600683           | 0.9982883                                     | -2.176575e-01 | 0.1964054368          |                                               |
| 0.80653217                                                    | 9.936077e-02  | 4.304453e-01                        | 0.9997779456                                                | -0.2225912773 | 0.6341442342          | 0.93852299                                    | -1.305824e-01 | 0.790470177           | 0.9982883                                     | 1.248891e-01  | 0.8368196200          |                                               |
| 0.88581308                                                    | 5.755813e-01  | 1.167496e-01                        | 0.9997779456                                                | -0.4283731095 | 0.3354082165          | 0.85880449                                    | 7.819189e-02  | 0.844199898           | 0.9982883                                     | 3.956651e-02  | 0.9475270859          |                                               |
| 0.97050390                                                    | -9.388206e-01 | 8.416727e-01                        | 0.9997779456                                                | -0.1014691118 | 0.8747824429          | 0.96947881                                    | -1.128130e+00 | 0.157968375           | 0.9982883                                     | -7.254915e-01 | 0.1609723076          |                                               |
| 0.92876201                                                    | 3.231207e-01  | 2.406902e-01                        | 0.9997779456                                                | 0.2012224514  | 0.7317523720          | 0.94712279                                    | -2.165300e-01 | 0.641049805           | 0.9982883                                     | -2.892426e-01 | 0.4280925202          |                                               |
| 0.98969697                                                    | -1.210484e+00 | 8.633920e-01                        | 0.9997779456                                                | -1.7398054957 | 0.0148339186          | 0.49365173                                    | -2.752242e-01 | 0.716554013           | 0.9982883                                     | 1.312001e-01  | 0.8753239818          |                                               |
| 0.87292023                                                    | -4.865342e-01 | 8.045893e-01                        | 0.9997779456                                                | 0.1339702816  | 0.7223409934          | 0.94712279                                    | -4.283486e-01 | 0.372127396           | 0.9982883                                     | -5.213268e-01 | 0.2066957972          |                                               |
| 0.84824569                                                    | -2.188262e-01 | 8.498449e-01                        | 0.9997779456                                                | -0.1371764141 | 0.7149871601          | 0.94529215                                    | -1.478803e-01 | 0.490449908           | 0.9982883                                     | -3.899385e-02 | 0.8769040257          |                                               |
| 0.97273515                                                    | -2.929371e-01 | 9.146321e-01                        | 0.9997779456                                                | 0.2208342086  | 0.5691002581          | 0.92122660                                    | 4.306976e-01  | 0.025271932           | 0.9982883                                     | -5.671191e-01 | 0.0101237958          |                                               |
| 0.80653217                                                    | -3.965359e-01 | 9.910959e-01                        | 0.9997779456                                                | -0.2461069605 | 0.2907287476          | 0.84915316                                    | 9.559354e-02  | 0.568084123           | 0.9982883                                     | -1.389324e-01 | 0.6606857836          |                                               |
| 0.80820047                                                    | -3.076418e-01 | 8.945090e-01                        | 0.9997779456                                                | 0.3579306946  | 0.0537991465          | 0.83664873                                    | 1.633878e-01  | 0.414664209           | 0.9982883                                     | -3.951610e-02 | 0.8208265518          |                                               |
| 0.97273515                                                    | -2.756053e-01 | 8.924706e-01                        | 0.9997779456                                                | 0.1905769437  | 0.4566631616          | 0.90612020                                    | 1.237003e-01  | 0.548479451           | 0.9982883                                     | -7.561464e-02 | 0.7369179765          |                                               |
| 0.90408005                                                    | -4.618923e-01 | 9.661048e-01                        | 0.9997779456                                                | -0.1546498991 | 0.5099517552          | 0.90612020                                    | -3.134715e-01 | 0.171483844           | 0.9982883                                     | -6.139976e-01 | 0.0039025279          |                                               |
| 0.97273515                                                    | -1.338820e+00 | 9.338369e-01                        | 0.9997779456                                                | -0.6790443525 | 0.2010239771          | 0.83807199                                    | -4.685507e-01 | 0.534646902           | 0.9982883                                     | -2.461247e-01 | 0.6128628701          |                                               |
| 0.96804147                                                    | -6.988670e-01 | 8.215756e-01                        | 0.9997779456                                                | 0.7011833304  | 0.2352675808          | 0.84413548                                    | 6.552107e-01  | 0.222914700           | 0.9982883                                     | -1.737321e-01 | 0.7243922107          |                                               |
| 0.80820047                                                    | 1.801438e-01  | 3.295673e-01                        | 0.9997779456                                                | -0.3821013084 | 0.4875441508          | 0.90612020                                    | 7.057691e-01  | 0.066855891           | 0.9982883                                     | -4.358759e-01 | 0.3351215956          |                                               |
| 0.95558280                                                    | -2.853912e-01 | 7.948580e-01                        | 0.9997779456                                                | -0.5882744090 | 0.0193687291          | 0.58702148                                    | -1.713136e-01 | 0.533264189           | 0.9982883                                     | -2.212476e-01 | 0.3614819677          |                                               |
| 0.77869908                                                    | 2.207594e-01  | 2.682067e-01                        | 0.9997779456                                                | 0.06069347006 | 0.8640919913          | 0.96707132                                    | -3.845598e-01 | 0.516900853           | 0.9982883                                     | -6.572352e-01 | 0.0606777812          |                                               |
| 0.87292023                                                    | 8.650954e-02  | 3.944281e-01                        | 0.9997779456                                                | -0.1517672713 | 0.7067743177          | 0.94482995                                    | -4.165456e-01 | 0.177175741           | 0.9982883                                     | -4.618428e-01 | 0.1928300068          |                                               |
| 0.98226159                                                    | -5.015327e-01 | 8.758036e-01                        | 0.9997779456                                                | 0.0732490109  | 0.8129955383          | 0.95972154                                    | 4.861149e-02  | 0.891252833           | 0.9982883                                     | -7.233766e-01 | 0.0502558618          |                                               |
| 0.79578964                                                    | -1.250137e-01 | 7.118264e-01                        | 0.9997779456                                                | -0.4628278721 | 0.0264756276          | 0.64586404                                    | -3.912779e-01 | 0.115157283           | 0.9982883                                     | -3.292068e-01 | 0.2450725451          |                                               |
| 0.85414112                                                    | -8.596031e-01 | 9.588162e-01                        | 0.9997779456                                                | -0.8166768680 | 0.0239685678          | 0.64388269                                    | -5.491604e-01 | 0.195596041           | 0.9982883                                     | 2.358767e-01  | 0.7477261319          |                                               |
| 0.94675587                                                    | 1.409140e-01  | 2.880602e-01                        | 0.9997779456                                                | 0.5965007208  | 0.0785894789          | 0.83807199                                    | 4.038419e-01  | 0.104606027           | 0.9982883                                     | 5.380044e-02  | 0.8938829354          |                                               |
| 0.97273515                                                    | -1.400283e+00 | 8.295448e-01                        | 0.9997779456                                                | -0.9383400703 | 0.2238353656          | 0.83807199                                    | -1.182469e+00 | 0.345659976           | 0.9982883                                     | -1.408053e+00 | 0.0943657437          |                                               |
| 0.97273515                                                    | -2.692168e-01 | 8.050249e-01                        | 0.9997779456                                                | 0.2512410299  | 0.5010689315          | 0.90612020                                    | -2.290915e-01 | 0.423344286           | 0.9982883                                     | 1.955206e-01  | 0.5877330571          |                                               |
| 0.96804147                                                    | 3.999099e-02  | 4.577158e-01                        | 0.9997779456                                                | -1.3094736911 | 0.0003999359          | 0.09450935                                    | -1.886389e-01 | 0.597422839           | 0.9982883                                     | 4.157088e-01  | 0.4877086770          |                                               |
| 0.77869908                                                    | -8.204628e-01 | 9.457244e-01                        | 0.9997779456                                                | -0.5317950844 | 0.1544156354          | 0.83807199                                    | 4.689505e-01  | 0.187767892           | 0.9982883                                     | -6.473538e-01 | 0.0916759388          |                                               |
| 0.98998602                                                    | -5.376863e-02 | 5.535707e-01                        | 0.9997779456                                                | 0.5836649788  | 0.3315548497          | 0.85754449                                    | -0.505931e-02 | 0.888902126           | 0.9982883                                     | 2.407295e-01  | 0.5309887896          |                                               |
| 0.97273515                                                    | -5.725066e-01 | 9.397822e-01                        | 0.9997779456                                                | -0.0593596832 | 0.8461873202          | 0.96338860                                    | 8.402089e-02  | 0.757178532           | 0.9982883                                     | 1.068801e-01  | 0.8090236464          |                                               |
| 0.89368789                                                    | -3.442023e-01 | 9.551234e-01                        | 0.9997779456                                                | -0.1441126757 | 0.5945916860          | 0.92532140                                    | -2.152248e-01 | 0.284001767           | 0.9982883                                     | -1.611770e-01 | 0.4930219413          |                                               |
| 0.811552863                                                   | -1.249752e-01 | 6.521716e-01                        | 0.9997779456                                                | 0.1001166044  | 0.7644734272          | 0.95505354                                    | 4.412912e-01  | 0.127146577           | 0.9982883                                     | 2.839862e-01  | 0.7333996573          |                                               |
| 0.86909435                                                    | -6.821095e-01 | 9.955366e-01                        | 0.9997779456                                                | -0.8988045287 | 0.0005578348          | 0.09450935                                    | -8.652308e-02 | 0.701078627           | 0.9982883                                     | -4.120112e-01 | 0.1402420528          |                                               |
| 0.94189574                                                    | -7.303703e-01 | 7.345307e-01                        | 0.9997779456                                                | 0.1764030510  | 0.8396208887          | 0.96321135                                    | -7.578844e-01 | 0.441755328           | 0.9982883                                     | -7.086108e-02 | 0.8918712751          |                                               |
| 0.77869908                                                    | -2.695614e-01 | 8.713349e-01                        | 0.9997779456                                                | -0.0777261763 | 0.8432170216          | 0.96338860                                    | -2.536431e-01 | 0.281582489           | 0.9982883                                     | -4.795183e-01 | 0.0834856799          |                                               |
| 0.92583146                                                    | 3.493532e-02  | 4.361982e-01                        | 0.9997779456                                                | -0.2427835423 | 0.3313096843          | 0.85754449                                    | -2.296704e-01 | 0.201564200           | 0.9982883                                     | 2.725876e-01  | 0.3041624885          |                                               |
| 0.99066584                                                    | -4.843376e-01 | 9.522578e-01                        | 0.9997779456                                                | 0.1823488436  | 0.7487820789          | 0.95349818                                    | -4.379914e-01 | 0.144701968           | 0.9982883                                     | -3.085488e-01 | 0.3401577881          |                                               |
| 0.96804147                                                    | -3.770353e-01 | 8.405151e-01                        | 0.9997779456                                                | -0.0266965444 | 0.6168861468          | 0.98077776                                    | -2.653317e-01 | 0.422837821           | 0.9982883                                     | -4.197403e-01 | 0.1057323117          |                                               |
| 0.97273515                                                    | -3.235823e-01 | 8.923192e-01                        | 0.9997779456                                                | -0.0232749678 | 0.9391174232          | 0.98648257                                    | 2.050389e-01  | 0.320741936           | 0.9982883                                     | -2.407005e-01 | 0.4321506279          |                                               |
| 0.97273515                                                    | -6.722856e-01 | 9.298832e-01                        | 0.9997779456                                                | 0.7098125084  | 0.2614718903          | 0.84915316                                    | 6.720004e-01  | 0.095785861           | 0.9982883                                     | -4.302587e-02 | 0.9308857465          |                                               |
| 0.92890486                                                    | -1.328330e-01 | 6.967216e-01                        | 0.9997779456                                                | -0.2216239345 | 0.4528706694          | 0.90612020                                    | 9.389637e-02  | 0.730672369           | 0.9982883                                     | -6.078333e-01 | 0.0028731177          |                                               |
| 0.84824569                                                    | -4.641125e-01 | 9.651583e-01                        | 0.9997779456                                                | -0.1351409397 | 0.4777699027          | 0.90612020                                    | 1.065084e-01  | 0.610650506           | 0.9982883                                     | -2.897390e-01 | 0.2371007564          |                                               |
| 0.87292023                                                    | -3.778965e-01 | 9.617039e-01                        | 0.9997779456                                                | -0.2656468853 | 0.2593796287          | 0.84915316                                    | 3.079010e-02  | 0.881982001           | 0.9982883                                     | 4.129573e-02  | 0.9132496290          |                                               |
| 0.77869908                                                    | 1.926020e-01  | 2.371175e-01                        | 0.9997779456                                                | 0.3076856230  | 0.3902913797          | 0.87916124                                    | -1.577082e-01 | 0.506106634           | 0.9982883                                     | -3.135177e-02 | 0.9286496593          |                                               |
| 0.80653217                                                    | -4.815513e-01 | 9.709756e-01                        | 0.9997779456                                                | -0.0214289522 | 0.9316551387          | 0.98590149                                    | -3.511173e-01 | 0.095110064           | 0.9982883                                     | -2.326623e-01 | 0.3782462448          |                                               |
| 0.97273515                                                    | -5.776632e-01 | 9.043469e-01                        | 0.9997779456                                                | 0.5276513189  | 0.2388268356          | 0.84413548                                    | 4.676224e-01  | 0.187637960           | 0.9982883                                     | 8.731992e-02  | 0.8542183071          |                                               |
| 0.83725376                                                    | -1.607584e-01 | 9.062827e-01                        | 0.9997779456                                                | 0.0723246934  | 0.6515158132          | 0.93854411                                    | -1.176251e-01 | 0.328496200           | 0.9982883                                     | -4.284548e-02 | 0.8504322008          |                                               |
| 0.84824569                                                    | -1.341891e-01 | 7.936711e-01                        | 0.9997779456                                                | -0.0798997255 | 0.7408264411          | 0.95076748                                    | -1.274979e-01 | 0.422050955           | 0.9982883                                     | 1.195081e-01  | 0.6741871733          |                                               |
| 0.77869908                                                    | 1.114627e-01  | 3.768606e-01                        | 0.9997779456                                                | -0.2587596781 | 0.4629913244          | 0.90612020                                    | 4.918328e-01  | 0.222720877           | 0.9982883                                     | -5.255333e-01 | 0.14893171205         |                                               |
| 0.77869908                                                    | -6.870656e-01 | 9.566802e-01                        | 0.9997779456                                                | -0.4753501653 | 0.2121591986          | 0.83807199                                    | -7.404374e-01 | 0.045912084           | 0.9982883                                     | -6.964143e-01 | 0.1027763227          |                                               |
| 0.77869908                                                    | -1.138528e-01 | 7.682761e-01                        | 0.9997779456                                                | 0.1103282995  | 0.5217164016          | 0.90612020                                    | 1.177161e-01  | 0.391905503           | 0.9982883                                     | -1.981784e-01 | 0.3617446598          |                                               |
| 0.95472383                                                    | -4.180148e-02 | 6.113098e-01                        | 0.9997779456                                                | -0.4153850585 | 0.0028199684          | 0.30301842                                    | 5.515848e-02  | 0.618103536           | 0.9982883                                     | -3.152345e-02 | 0.8266857450          |                                               |
| 0.90482806                                                    | 9.243797e-02  | 3.890185e-01                        | 0.9997779456                                                | -0.3563509152 | 0.3865015044          | 0.87916124                                    | -1.924510e-02 | 0.941225830           | 0.998411                                      | 5.021107e-01  | 0.1816397201          |                                               |
| 0.77869908                                                    | 5.136274e-01  | 1.747689e-01                        | 0.9997779456                                                | 0.9597897357  | 0.2259875952          | 0.83807199                                    | 1.163640e-01  | 0.854534762           | 0.9982883                                     | -2.873512e-01 | 0.6007473920          |                                               |
| 0.95472383                                                    | -8.238235e-02 | 7.080771e-01                        | 0.9997779456                                                | -0.1154639629 | 0.4209401165          | 0.89947025                                    | -2.333780e-01 | 0.096301516           | 0.9982883                                     | 3.084708e-01  | 0.8606261181          |                                               |
| 0.96804147                                                    | -1.094718e-01 | 7.687776e-01                        | 0.9997779456                                                | 0.0102510288  | 0.9507611867          | 0.99100505                                    | -1.191662e-01 | 0.433755633           | 0.9982883                                     | -3.953147e-02 | 0.8545330017          |                                               |
| 0.89273364                                                    | -1.895927e-01 | 7.150973e-01                        | 0.9997779456                                                | 0.2881741829  | 0.4704591514          | 0.90612020                                    | 1.324608e-01  | 0.627440985           | 0.9982883                                     | -1.186979e-01 | 0.70261582240         |                                               |
| 0.98111638                                                    | -3.185130e-01 | 7.926179e-01                        | 0.9997779456                                                | 0.1507122073  | 0.5924740183          | 0.92532140                                    | 1.440924e-02  | 0.953866139           | 0.998411                                      | -3.157259e-01 | 0.1289637921          |                                               |
| 0.87292023                                                    | -1.824957e-01 | 9.515987e-01                        | 0.9997779456                                                | -0.1039482471 | 0.2772704203          | 0.84915316                                    | -3.803585e-02 | 0.643371699           | 0.9982883                                     | -2.709048e-02 | 0.7525571601          |                                               |
| 0.97522657                                                    | -3.043763e-01 | 9.806487e-01                        | 0.9997779456                                                | 0.0720737527  | 0.6882593208          | 0.94482995                                    | 7.607618e-03  | 0.951277993           | 0.998411                                      | -4.491605e-01 | 0.0013692453          |                                               |
| 0.77869908                                                    | 4.881717      |                                     |                                                             |               |                       |                                               |               |                       |                                               |               |                       |                                               |



|            |               |              |              |               |              |             |               |             |           |               |              |
|------------|---------------|--------------|--------------|---------------|--------------|-------------|---------------|-------------|-----------|---------------|--------------|
| 0.97273515 | 5.142027e-01  | 2.158806e-01 | 0.9997779456 | -0.5032658209 | 0.4674743020 | 0.90612020  | 4.283533e-01  | 0.527920113 | 0.9982883 | -1.073025e+00 | 0.1222495800 |
| 0.97273515 | -2.968401e-01 | 9.767287e-01 | 0.9997779456 | -0.1609501556 | 0.4443073239 | 0.90612020  | 1.719428e-01  | 0.243653450 | 0.9982883 | 1.566193e-01  | 0.2599764677 |
| 0.93081046 | -4.151916e-02 | 5.320120e-01 | 0.9997779456 | -0.8177756866 | 0.1510819123 | 0.83807199  | -0.254076e-01 | 0.782119595 | 0.9982883 | -2.567446e-01 | 0.7918706217 |
| 0.79578964 | 7.824358e-02  | 4.261807e-01 | 0.9997779456 | 0.0552777368  | 0.8942902567 | 0.97246977  | 8.618315e-02  | 0.836283025 | 0.9982883 | -1.236255e-01 | 0.7889518494 |
| 0.77869908 | 1.688801e+00  | 7.037455e-02 | 0.9997779456 | -0.0277651778 | 0.9816270811 | 0.99380888  | 2.371172e+00  | 0.063757953 | 0.9982883 | 1.0912779e+00 | 0.5968015323 |
| 0.77869908 | -1.480117e-02 | 5.703376e-01 | 0.9997779456 | -0.2225869470 | 0.1639492083 | 0.83807199  | 2.597588e-02  | 0.719906450 | 0.9982883 | -5.345094e-04 | 0.9962460267 |
| 0.96416435 | 2.990484e-02  | 3.647931e-01 | 0.9997779456 | -0.0304433281 | 0.8188572864 | 0.95972154  | -8.824024e-03 | 0.954532652 | 0.9986411 | -1.581688e-01 | 0.1638333124 |
| 0.77869908 | -1.459985e-01 | 7.963674e-01 | 0.9997779456 | -0.2686566282 | 0.2942444747 | 0.84915316  | -1.105615e-01 | 0.423476737 | 0.9982883 | -1.776595e-01 | 0.5151121481 |
| 0.81552863 | -8.072344e-02 | 6.815949e-01 | 0.9997779456 | 0.0645474623  | 0.8470200074 | 0.96338860  | -1.640989e-02 | 0.915579437 | 0.9982883 | -1.712445e-02 | 0.9078106015 |
| 0.98544646 | 2.943906e-02  | 4.546454e-01 | 0.9997779456 | -0.2827440601 | 0.1644851887 | 0.83807199  | -1.097865e-01 | 0.613116920 | 0.9982883 | -2.443085e-01 | 0.5432744237 |
| 0.77869908 | 4.752300e-01  | 1.049349e-01 | 0.9997779456 | 0.2701103869  | 0.5950109428 | 0.92532140  | 5.520629e-01  | 0.154159335 | 0.9982883 | -2.691251e-01 | 0.6990311333 |
| 0.90482806 | -2.955081e-01 | 6.630615e-01 | 0.9997779456 | 0.5578388797  | 0.3662636906 | 0.87664366  | 5.876397e-01  | 0.281177979 | 0.9982883 | 2.259317e-01  | 0.6345712804 |
| 0.77869908 | -7.165914e-02 | 7.224989e-01 | 0.9997779456 | -0.0490022968 | 0.6418853345 | 0.93854411  | 3.188829e-02  | 0.745488825 | 0.9982883 | -3.342328e-02 | 0.7959537922 |
| 0.97185522 | -1.589497e-01 | 9.108737e-01 | 0.9997779456 | -0.0335557991 | 0.7788443632 | 0.95657490  | -9.468840e-03 | 0.926381617 | 0.9982883 | 3.340079e-02  | 0.7750399158 |
| 0.95639607 | 2.379207e-01  | 3.747486e-02 | 0.9997779456 | 0.1257323005  | 0.5247088636 | 0.90612020  | -1.420025e-01 | 0.260986193 | 0.9982883 | -3.804326e-02 | 0.8198578706 |
| 0.82743594 | 2.095984e-01  | 1.623342e-01 | 0.9997779456 | -0.0397378244 | 0.8269568958 | 0.95988696  | 2.935511e-01  | 0.181486696 | 0.9982883 | -2.279429e-01 | 0.5631013936 |
| 0.95284371 | -1.809241e-01 | 8.802572e-01 | 0.9997779456 | -0.1450088399 | 0.4546448708 | 0.90612020  | -8.128925e-02 | 0.467106031 | 0.9982883 | -3.694680e-02 | 0.7688744478 |
| 0.77869908 | 1.199600e-01  | 4.939306e-02 | 0.9997779456 | -0.0390066125 | 0.6500181642 | 0.93854411  | -5.202996e-03 | 0.942824448 | 0.9986411 | -6.456493e-02 | 0.5894358524 |
| 0.88273364 | -1.488298e-01 | 7.934419e-01 | 0.9997779456 | 0.1388214327  | 0.4215791182 | 0.89947025  | 2.289176e-01  | 0.084346356 | 0.9982883 | 5.348034e-02  | 0.8403885570 |
| 0.77869908 | 1.702484e-01  | 2.316324e-01 | 0.9997779456 | 0.1314027061  | 0.6366525895 | 0.93852299  | 6.230350e-02  | 0.745595956 | 0.9982883 | 1.808360e-01  | 0.5424780406 |
| 0.77869908 | -8.874530e-02 | 7.694847e-01 | 0.9997779456 | -0.1783809025 | 0.1424354259 | 0.83807199  | -1.769023e-02 | 0.840625522 | 0.9982883 | 1.790322e-01  | 0.1287740029 |
| 0.81804251 | 2.064395e-01  | 4.123413e-01 | 0.9997779456 | 1.1074101818  | 0.3106372931 | 0.84915316  | 8.180158e-01  | 0.348305449 | 0.9982883 | -3.933792e-02 | 0.9681677790 |
| 0.77869908 | 7.118911e-02  | 1.692153e-01 | 0.9997779456 | 0.0403695603  | 0.7160712353 | 0.94569408  | 4.491397e-02  | 0.498786637 | 0.9982883 | 5.202752e-02  | 0.5571294512 |
| 0.99258481 | -2.752909e-01 | 9.622325e-01 | 0.9997779456 | -0.1050275239 | 0.5332037137 | 0.90627295  | 2.682965e-02  | 0.822154257 | 0.9982883 | -1.082655e-01 | 0.5267900912 |
| 0.97522657 | -1.035871e-01 | 8.337120e-01 | 0.9997779456 | -0.0228349888 | 0.8064280786 | 0.95972154  | -2.758299e-02 | 0.767188007 | 0.9982883 | -4.381890e-02 | 0.6778505661 |
| 0.77869908 | 1.011204e-02  | 4.577119e-01 | 0.9997779456 | 0.0593187108  | 0.5843816715 | 0.92532140  | 1.437605e-01  | 0.047810780 | 0.9982883 | -4.697671e-03 | 0.9556009593 |
| 0.77869908 | -5.553372e-02 | 7.529560e-01 | 0.9997779456 | -0.0930316631 | 0.3127960671 | 0.84915316  | 6.616241e-02  | 0.328481605 | 0.9982883 | 1.257297e-01  | 0.1153548026 |
| 0.77869908 | 4.033147e-02  | 2.579569e-01 | 0.9997779456 | 0.0098430079  | 0.9210487081 | 0.868256279 | 5.474823e-02  | 0.301677380 | 0.9982883 | 9.719856e-02  | 0.1679957517 |
| 0.77869908 | -6.589811e-02 | 6.828358e-01 | 0.9997779456 | -0.2303718650 | 0.1380745782 | 0.83807199  | -1.113060e-01 | 0.411792001 | 0.9982883 | -7.772360e-02 | 0.4376409824 |
| 0.80280047 | 1.201071e-01  | 1.903806e-01 | 0.9997779456 | 0.0629941296  | 0.7322001738 | 0.94712279  | -1.696751e-02 | 0.857814115 | 0.9982883 | 1.931924e-01  | 0.0882704917 |
| 0.98258481 | -1.223635e-01 | 8.808410e-01 | 0.9997779456 | 0.1518295087  | 0.3872465756 | 0.87916124  | 8.068232e-03  | 0.936341567 | 0.9986411 | -1.434347e-01 | 0.1184218060 |
| 0.95181672 | 2.445024e-02  | 4.656568e-01 | 0.9997779456 | 0.4072098076  | 0.2189046298 | 0.83807199  | 1.237849e-01  | 0.579006206 | 0.9982883 | 1.406393e-01  | 0.4892660339 |
| 0.92890486 | 2.157305e-02  | 4.567457e-01 | 0.9997779456 | 0.2311465830  | 0.3481409774 | 0.86678800  | -1.246057e-01 | 0.609627133 | 0.9982883 | -1.040880e-01 | 0.5945756430 |
| 0.93017119 | 9.301106e-02  | 3.195386e-01 | 0.9997779456 | 0.1334771705  | 0.5312532166 | 0.90612020  | -4.880003e-02 | 0.780266198 | 0.9982883 | 1.373904e-01  | 0.4827201128 |
| 0.97273515 | 1.532317e-01  | 1.463274e-01 | 0.9997779456 | 0.1757130834  | 0.4945753509 | 0.90612020  | 4.329156e-02  | 0.744663714 | 0.9982883 | -9.091221e-02 | 0.6043399652 |
| 0.97273515 | -8.198909e-01 | 8.312189e-01 | 0.9997779456 | -0.2207439790 | 0.5527752869 | 0.91068209  | 1.974857e-01  | 0.658616770 | 0.9982883 | -6.419719e-01 | 0.1032918663 |
| 0.97050390 | 1.341117e-01  | 1.212053e-01 | 0.9997779456 | 0.1369716380  | 0.3413524498 | 0.86029551  | -1.444198e-02 | 0.877756493 | 0.9982883 | -5.159316e-02 | 0.7440135809 |
| 0.98111638 | -4.030940e-02 | 6.213088e-01 | 0.9997779456 | 0.0892275472  | 0.4988670399 | 0.90612020  | -4.405266e-02 | 0.720505845 | 0.9982883 | 1.991307e-01  | 0.1003366819 |
| 0.99066584 | 3.136701e-02  | 3.649542e-01 | 0.9997779456 | 0.2532948253  | 0.1504647556 | 0.83807199  | 2.060564e-01  | 0.025813143 | 0.9982883 | 1.356996e-01  | 0.2217526486 |
| 0.80653217 | 2.763405e-02  | 3.724870e-01 | 0.9997779456 | -0.0245781990 | 0.7418016792 | 0.95098653  | -1.556643e-02 | 0.844397631 | 0.9982883 | 8.023817e-02  | 0.4696038315 |
| 0.77869908 | -9.611748e-03 | 5.335216e-01 | 0.9997779456 | -0.1317079490 | 0.2415306843 | 0.84413548  | -3.045744e-02 | 0.713677316 | 0.9982883 | 5.343354e-02  | 0.5605878248 |
| 0.96804147 | -3.212658e-02 | 6.347577e-01 | 0.9997779456 | 0.0647932679  | 0.6562222615 | 0.93854411  | 2.779146e-03  | 0.973447317 | 0.9986411 | -4.532245e-02 | 0.6081993012 |
| 0.97273515 | -1.928328e-01 | 9.646793e-01 | 0.9997779456 | -0.0003410065 | 0.9976913472 | 0.99853613  | 4.724451e-02  | 0.596434331 | 0.9982883 | 1.079049e-01  | 0.3345004294 |
| 0.92890486 | -2.068205e-01 | 9.059993e-01 | 0.9997779456 | -0.2195986632 | 0.0734184951 | 0.83807199  | -1.517830e-01 | 0.201252650 | 0.9982883 | 5.676299e-02  | 0.7575022686 |
| 0.80820047 | -1.488717e-01 | 7.984908e-01 | 0.9997779456 | -0.3764070010 | 0.0062821467 | 0.40915301  | -2.659633e-01 | 0.058456716 | 0.9982883 | -9.483499e-02 | 0.6362190415 |
| 0.84824569 | 7.800897e-02  | 3.041481e-01 | 0.9997779456 | 0.3304277521  | 0.1899140936 | 0.83807199  | 8.840899e-02  | 0.564013608 | 0.9982883 | 3.795856e-02  | 0.8657995676 |
| 0.99018039 | -4.696742e-02 | 6.806128e-01 | 0.9997779456 | 0.2296393949  | 0.2406210833 | 0.84413548  | 7.030644e-02  | 0.520367213 | 0.9982883 | -1.511712e-01 | 0.2573699696 |
| 0.98996967 | -9.211026e-02 | 7.778548e-01 | 0.9997779456 | 0.1341998983  | 0.4668328417 | 0.90612020  | -7.084661e-02 | 0.470204701 | 0.9982883 | -1.089504e-02 | 0.9200091107 |
| 0.99066584 | 3.803074e-02  | 4.105161e-01 | 0.9997779456 | 0.2161127898  | 0.3124312717 | 0.84915316  | -1.546353e-02 | 0.916489794 | 0.9982883 | -3.636168e-01 | 0.0164199493 |
| 0.97522657 | -3.020290e-01 | 7.342587e-01 | 0.9997779456 | -0.1635212168 | 0.5086246318 | 0.90612020  | -1.740490e-01 | 0.490656906 | 0.9982883 | -4.414413e-01 | 0.0558507822 |
| 0.97273515 | 6.040986e-02  | 2.957655e-01 | 0.9997779456 | 0.2650279391  | 0.1655165036 | 0.83807199  | 2.462343e-02  | 0.777846765 | 0.9982883 | 6.738896e-02  | 0.5071176308 |
| 0.81163165 | -1.469051e-01 | 7.183217e-01 | 0.9997779456 | 0.0417422716  | 0.8399593388 | 0.96321135  | 1.584706e-01  | 0.437473510 | 0.9982883 | 2.059270e-02  | 0.8971868690 |
| 0.99066584 | -2.164653e-01 | 9.275008e-01 | 0.9997779456 | 0.0589815264  | 0.7236275411 | 0.94712279  | -2.209380e-02 | 0.875382063 | 0.9982883 | -3.850363e-01 | 0.0012010214 |
| 0.96804147 | -1.461494e-01 | 6.997683e-01 | 0.9997779456 | -0.2529739406 | 0.4762349146 | 0.90612020  | -3.889967e-01 | 0.158126237 | 0.9982883 | -4.373730e-03 | 0.9871104010 |
| 0.97144018 | -4.732465e-01 | 9.638978e-01 | 0.9997779456 | -0.2407420571 | 0.2918934111 | 0.84915316  | 1.013414e-01  | 0.625302343 | 0.9982883 | -7.096298e-01 | 0.0392184909 |
| 0.81552863 | -1.651462e-01 | 8.736104e-01 | 0.9997779456 | 0.2210604753  | 0.4375013378 | 0.90612020  | 1.384044e-01  | 0.310877689 | 0.9982883 | 8.534343e-02  | 0.6954283407 |
| 0.87292023 | -2.102400e-01 | 8.989912e-01 | 0.9997779456 | -0.0773072277 | 0.7862499083 | 0.95907804  | -2.021807e-01 | 0.289529063 | 0.9982883 | -1.587629e-01 | 0.3945866994 |
| 0.77869908 | -6.072872e-02 | 5.935898e-01 | 0.9997779456 | -0.2839665524 | 0.3921684894 | 0.84915316  | -1.071604e-01 | 0.684917344 | 0.9982883 | -5.071018e-01 | 0.1623302217 |
| 0.77869908 | 1.832061e-01  | 3.438210e-01 | 0.9997779456 | -0.5764208148 | 0.2204230095 | 0.83807199  | 4.682171e-01  | 0.327613473 | 0.9982883 | -4.426181e-01 | 0.3365078162 |
| 0.97185522 | -4.049116e-01 | 9.871581e-01 | 0.9997779456 | -0.2343679151 | 0.3335756214 | 0.85880449  | -2.274958e-01 | 0.177075365 | 0.9982883 | -4.475758e-01 | 0.0374598677 |
| 0.98111638 | -5.242068e-01 | 9.594476e-01 | 0.9997779456 | 0.1098686768  | 0.6798456755 | 0.94316618  | -2.931997e-01 | 0.274917284 | 0.9982883 | -2.379446e-01 | 0.3062085311 |
| 0.97578964 | -2.477579e-01 | 8.822588e-01 | 0.9997779456 | 0.0415862638  | 0.900        |             |               |             |           |               |              |

|            |               |              |              |               |              |             |               |             |           |               |              |
|------------|---------------|--------------|--------------|---------------|--------------|-------------|---------------|-------------|-----------|---------------|--------------|
| 0.81552863 | -2.075556e-01 | 8.328385e-01 | 0.9997779456 | -0.1661182147 | 0.5615328030 | 0.91675659  | -2.697330e-01 | 0.188648794 | 0.9982883 | 3.763072e-02  | 0.8886276817 |
| 0.97273515 | -4.650185e-02 | 6.420365e-01 | 0.9997779456 | -0.1287589955 | 0.3630188968 | 0.87404187  | -1.182354e-01 | 0.219939375 | 0.9982883 | 7.846931e-03  | 0.9599491378 |
| 0.98989697 | -8.612865e-03 | 5.191176e-01 | 0.9997779456 | 0.3983585544  | 0.2979531432 | 0.84915316  | 2.548764e-01  | 0.228440366 | 0.9982883 | -4.215171e-01 | 0.0386482624 |
| 0.98989697 | -3.254818e-01 | 8.406147e-01 | 0.9997779456 | 0.2416129679  | 0.7494076193 | 0.95349818  | -3.355431e-01 | 0.259782556 | 0.9982883 | -5.606755e-02 | 0.8921494650 |
| 0.90581107 | -7.936893e-02 | 9.337175e-01 | 0.9997779456 | -0.0707773033 | 0.4277801264 | 0.90454000  | 7.157011e-02  | 0.233240150 | 0.9982883 | 5.188899e-02  | 0.5213405486 |
| 0.77869908 | -9.263293e-02 | 8.328748e-01 | 0.9997779456 | -0.1580621963 | 0.0796978836 | 0.83807199  | -1.666232e-01 | 0.066636673 | 0.9982883 | 1.246972e-01  | 0.3755261092 |
| 0.97273515 | -9.370499e-02 | 6.697901e-01 | 0.9997779456 | 0.1866156739  | 0.7014620981 | 0.94482995  | -3.377672e-01 | 0.068263382 | 0.9982883 | -2.772641e-01 | 0.0663505148 |
| 0.90581107 | 3.701070e-01  | 1.871836e-01 | 0.9997779456 | 0.5519730378  | 0.1461129958 | 0.83807199  | 2.574378e-01  | 0.562500823 | 0.9982883 | -2.609233e-01 | 0.6234683521 |
| 0.80653217 | -1.370794e-01 | 9.673274e-01 | 0.9997779456 | -0.0729798467 | 0.4511630648 | 0.90612020  | 5.432777e-02  | 0.484613212 | 0.9982883 | 8.405888e-03  | 0.9423400159 |
| 0.96804147 | -2.637059e-01 | 6.725480e-01 | 0.9997779456 | -0.2976472230 | 0.5248415237 | 0.90612020  | 2.218903e-01  | 0.502220418 | 0.9982883 | 1.814693e-02  | 0.9686775502 |
| 0.80653217 | 3.928583e-01  | 9.584045e-02 | 0.9997779456 | 0.0655066706  | 0.8870034161 | 0.97235837  | 4.707482e-02  | 0.876823524 | 0.9982883 | -1.431897e-01 | 0.6376765225 |
| 0.87292023 | 2.536570e-01  | 2.541824e-01 | 0.9997779456 | 0.8437132513  | 0.1783649513 | 0.83807199  | 2.482302e-01  | 0.569209973 | 0.9982883 | -1.523044e-01 | 0.7347813119 |
| 0.77869908 | 3.591267e-01  | 2.608513e-01 | 0.9997779456 | 0.2914282174  | 0.5654248384 | 0.91973112  | 1.069398e-01  | 0.854842881 | 0.9982883 | -3.735908e-01 | 0.4616611339 |
| 0.80868047 | -5.036350e-01 | 6.967317e-01 | 0.9997779456 | 2.0232670256  | 0.2506346082 | 0.84467092  | 9.939615e-01  | 0.320766637 | 0.9982883 | -2.365650e+00 | 0.0271062222 |
| 0.87292023 | -2.953838e-01 | 8.980354e-01 | 0.9997779456 | -0.6361459546 | 0.0003384800 | 0.09450935  | -1.230540e-01 | 0.522739404 | 0.9982883 | 1.347545e-01  | 0.5079209318 |
| 0.84824569 | -2.357979e-01 | 9.260647e-01 | 0.9997779456 | -0.0419302806 | 0.8065141532 | 0.95972154  | 7.263670e-02  | 0.527961096 | 0.9982883 | -5.017760e-01 | 0.0032459175 |
| 0.81552863 | 1.898725e-01  | 3.188626e-01 | 0.9997779456 | 0.4983120474  | 0.2454278156 | 0.84413548  | 3.679517e-02  | 0.924401295 | 0.9982883 | -1.608754e-01 | 0.6964797278 |
| 0.82743594 | 3.980941e-01  | 1.175098e-01 | 0.9997779456 | 0.4532928302  | 0.3503864720 | 0.86676800  | 3.858021e-01  | 0.261163461 | 0.9982883 | 4.282479e-01  | 0.3966936762 |
| 0.86909435 | -1.141916e-01 | 6.954959e-01 | 0.9997779456 | -0.0824662151 | 0.7095656401 | 0.94482995  | 9.786665e-02  | 0.580042488 | 0.9982883 | 1.010152e-01  | 0.6343686591 |
| 0.77869908 | 3.730006e-01  | 1.659735e-01 | 0.9997779456 | -0.3843775924 | 0.3358541462 | 0.85880449  | -6.636845e-01 | 0.300407724 | 0.9982883 | -4.63096e-01  | 0.2298768055 |
| 0.93403493 | 3.508183e-01  | 2.017838e-03 | 0.9962712336 | 0.4561072883  | 0.0308621449 | 0.66532795  | 1.059504e-01  | 0.423364345 | 0.9982883 | -5.627426e-03 | 0.9736970110 |
| 0.99018039 | 1.853072e-02  | 4.371534e-01 | 0.9997779456 | 0.1794926803  | 0.1297949432 | 0.83807199  | 2.527019e-02  | 0.814682319 | 0.9982883 | 1.899106e-01  | 0.2443146982 |
| 0.99066584 | -1.293762e-01 | 8.256471e-01 | 0.9997779456 | -0.0647118283 | 0.7392071555 | 0.94973704  | 6.976161e-02  | 0.541828403 | 0.9982883 | -1.467035e-01 | 0.4270815902 |
| 0.96416435 | 4.413186e-02  | 3.483560e-01 | 0.9997779456 | 0.1011976401  | 0.5712035961 | 0.92122600  | 8.281974e-02  | 0.427270794 | 0.9982883 | -1.350429e-02 | 0.9056983225 |
| 0.97273515 | -2.251067e-01 | 6.575312e-01 | 0.9997779456 | 0.1894720893  | 0.7924483948 | 0.95972154  | 9.035617e-02  | 0.823681476 | 0.9982883 | -3.952426e-01 | 0.2326582283 |
| 0.81804251 | 2.049241e-01  | 1.328815e-01 | 0.9997779456 | 0.1266468531  | 0.6569776791 | 0.93854411  | 1.179296e-01  | 0.454662598 | 0.9982883 | 1.036836e-01  | 0.5582708026 |
| 0.99066584 | -1.451365e-01 | 8.860289e-01 | 0.9997779456 | -0.0348853937 | 0.7788629574 | 0.95657490  | -1.138739e-01 | 0.209151126 | 0.9982883 | -7.277745e-02 | 0.5295425321 |
| 0.92876201 | -1.818767e-01 | 6.453686e-01 | 0.9997779456 | 0.0891842558  | 0.9048296387 | 0.97582904  | -7.602783e-02 | 0.863718578 | 0.9982883 | -2.806808e-02 | 0.9450840895 |
| 0.97522657 | 8.992656e-02  | 3.671228e-01 | 0.9997779456 | 0.5131558791  | 0.2421808441 | 0.84413548  | 2.923104e-01  | 0.244533292 | 0.9982883 | -1.158754e-01 | 0.7021426460 |
| 0.81552863 | 1.915745e-01  | 2.716561e-01 | 0.9997779456 | 0.8231930835  | 0.2074678271 | 0.83807199  | -2.627030e-02 | 0.869664815 | 0.9982883 | 2.189169e-01  | 0.5745294266 |
| 0.98146689 | -3.299390e-01 | 9.954481e-01 | 0.9997779456 | -0.0550305694 | 0.6878376666 | 0.94482995  | -5.634445e-02 | 0.633210814 | 0.9982883 | -2.743399e-01 | 0.0178950603 |
| 0.89512661 | -1.928181e-01 | 9.150015e-01 | 0.9997779456 | -0.0817717009 | 0.6111937456 | 0.93042774  | 1.094426e-01  | 0.399464960 | 0.9982883 | -1.778956e-01 | 0.3451154780 |
| 0.97273515 | 1.156251e-01  | 2.321507e-01 | 0.9997779456 | 0.1863061351  | 0.2976871590 | 0.84915316  | -4.003435e-02 | 0.730092979 | 0.9982883 | 1.312500e-02  | 0.9077867928 |
| 0.97522657 | 8.047310e-03  | 4.681680e-01 | 0.9997779456 | 0.2305801281  | 0.2031445718 | 0.83807199  | -1.785162e-03 | 0.985541846 | 0.9986411 | -4.196435e-02 | 0.6635352522 |
| 0.88581308 | -4.233000e-01 | 6.358874e-01 | 0.9997779456 | 0.3277074389  | 0.7133768547 | 0.94482995  | 4.990493e-01  | 0.567770118 | 0.9982883 | 3.301699e-01  | 0.6895718132 |
| 0.87292023 | 4.201801e-02  | 3.947729e-01 | 0.9997779456 | -0.0732804471 | 0.4852000874 | 0.90612020  | 1.999572e-01  | 0.064848225 | 0.9982883 | 1.557919e-01  | 0.3982119499 |
| 0.97273515 | -0.092547e-01 | 9.453328e-01 | 0.9997779456 | 0.2022475978  | 0.1859868921 | 0.83807199  | 5.430782e-02  | 0.702355091 | 0.9982883 | -2.745923e-01 | 0.0479981137 |
| 0.93688506 | -2.916232e-02 | 5.521004e-01 | 0.9997779456 | -0.1218795185 | 0.7306124402 | 0.94712279  | -3.321393e-01 | 0.124499422 | 0.9982883 | -1.529325e-01 | 0.5682358118 |
| 0.80820047 | -1.730063e-01 | 8.263208e-01 | 0.9997779456 | 0.0597899754  | 0.7051798375 | 0.94482995  | 3.448127e-02  | 0.836598535 | 0.9982883 | -3.112294e-01 | 0.1648208365 |
| 0.90482806 | -5.487452e-01 | 9.995351e-01 | 0.9997779456 | -0.3479548898 | 0.0303651638 | 0.66532795  | -1.413158e-03 | 0.993275076 | 0.9981193 | -2.460915e-01 | 0.2296482932 |
| 0.94189574 | -1.883616e-01 | 9.305686e-01 | 0.9997779456 | -0.0237377075 | 0.8626077420 | 0.967707132 | -3.181741e-02 | 0.755998351 | 0.9982883 | -0.046866e-01 | 0.0003896057 |
| 0.80868047 | -1.662028e-01 | 7.315176e-01 | 0.9997779456 | -1.093960306  | 0.0085352423 | 0.43637273  | -1.732334e-01 | 0.381747162 | 0.9982883 | 2.284466e-01  | 0.4135446741 |
| 0.80653217 | 2.265272e-01  | 1.908664e-01 | 0.9997779456 | 0.0877977098  | 0.7460949176 | 0.95235874  | 6.444372e-02  | 0.778587975 | 0.9982883 | 2.287771e-02  | 0.9359496314 |
| 0.96804147 | -1.388237e-01 | 9.066330e-01 | 0.9997779456 | 0.1288402722  | 0.2800913993 | 0.84915316  | 8.376170e-02  | 0.417629827 | 0.9982883 | 2.328455e-02  | 0.8586267375 |
| 0.86278674 | -3.973853e-02 | 5.765159e-01 | 0.9997779456 | -0.0779177828 | 0.7441362304 | 0.95148651  | 1.063780e-01  | 0.531623498 | 0.9982883 | 1.887136e-01  | 0.4313071601 |
| 0.89512661 | 6.016032e-02  | 2.928084e-01 | 0.9997779456 | 0.1809343454  | 0.0741160486 | 0.83807199  | 1.028756e-01  | 0.276255397 | 0.9982883 | -4.989138e-02 | 0.6624548485 |
| 0.92226585 | -3.275999e-02 | 5.484991e-01 | 0.9997779456 | 0.4822830101  | 0.2421368378 | 0.84413548  | -7.779077e-03 | 0.970960417 | 0.9986411 | -2.833494e-01 | 0.3049232655 |
| 0.95284371 | -1.151478e-01 | 8.757144e-01 | 0.9997779456 | -0.1779546869 | 0.2215385097 | 0.83807199  | -7.169486e-02 | 0.421254165 | 0.9982883 | 2.362975e-02  | 0.8332194482 |
| 0.97273515 | -1.160847e-01 | 8.797944e-01 | 0.9997779456 | -0.0281375897 | 0.8216905219 | 0.95972154  | 4.692823e-03  | 0.955355686 | 0.9986411 | -1.678961e-02 | 0.8871494547 |
| 0.77869908 | -6.598692e-02 | 6.289198e-01 | 0.9997779456 | 0.1158963455  | 0.4948396269 | 0.90612020  | 3.505754e-01  | 0.032362234 | 0.9982883 | -3.088690e-01 | 0.1654702159 |
| 0.77869908 | -1.725054e-02 | 5.496827e-01 | 0.9997779456 | -0.4416843332 | 0.1067670203 | 0.46180258  | -8.749423e-02 | 0.404798920 | 0.9982883 | -1.638485e-02 | 0.8678509576 |
| 0.81163165 | -4.287802e-02 | 7.222787e-01 | 0.9997779456 | -0.1458997409 | 0.2000759378 | 0.83807199  | -2.695844e-02 | 0.655856810 | 0.9982883 | -7.337310e-02 | 0.4186421156 |
| 0.80869506 | 5.871410e-02  | 2.452503e-01 | 0.9997779456 | 0.0294950609  | 0.7781634982 | 0.95657490  | 9.842332e-02  | 0.237966913 | 0.9982883 | 1.473331e-01  | 0.0480859882 |
| 0.97273515 | 5.065678e-02  | 3.724376e-01 | 0.9997779456 | -0.1408579494 | 0.2634195832 | 0.84915316  | 1.184724e-01  | 0.370820366 | 0.9982883 | 4.023420e-02  | 0.8393079303 |
| 0.95284371 | 1.882265e-01  | 1.011795e-01 | 0.9997779456 | 0.2312758696  | 0.1873346374 | 0.83807199  | 1.107778e-01  | 0.290729540 | 0.9982883 | -5.859170e-02 | 0.5456208150 |
| 0.79972808 | -9.532262e-03 | 5.107824e-01 | 0.9997779456 | 0.5656798865  | 0.2595809200 | 0.84915316  | 3.037879e-01  | 0.229262731 | 0.9982883 | 1.323304e-01  | 0.6629659837 |
| 0.77869908 | -1.009051e-02 | 5.431581e-01 | 0.9997779456 | -0.0425138874 | 0.7066825794 | 0.94482995  | -9.815405e-02 | 0.255999301 | 0.9982883 | 1.917924e-02  | 0.8629719943 |
| 0.99062247 | 2.286455e-01  | 1.397207e-01 | 0.9997779456 | 0.4784908340  | 0.0809112156 | 0.83807199  | 1.570275e-01  | 0.358144623 | 0.9982883 | -7.699342e-02 | 0.6389125268 |
| 0.99066584 | -2.210037e-01 | 9.768471e-01 | 0.9997779456 | 0.1286317747  | 0.4675624335 | 0.90612020  | -2.216013e-02 | 0.802026774 | 0.9982883 | -1.806206e-01 | 0.1687306941 |
| 0.97273515 | -5.311088e-02 | 7.031542e-01 | 0.9997779456 | 0.2225497384  | 0.1526270258 | 0.83807199  | 2.076942e-02  | 0.804466837 | 0.9982883 | 1.608396e-02  | 0.9179454564 |
| 0.95353311 | -3.867045e-01 | 7.651418e-01 | 0.9997779456 | -0.1462879642 | 0.6886332997 | 0.94482995  | 1.581896e-02  | 0.966250805 | 0.9986411 | -3.756375e-01 | 0.3266715178 |
| 0.97273515 | -4.345023e-02 | 6.179183e-01 | 0.9997779456 | -0.0088784154 | 0.953279     |             |               |             |           |               |              |



|             |               |              |              |               |              |            |               |              |           |               |              |
|-------------|---------------|--------------|--------------|---------------|--------------|------------|---------------|--------------|-----------|---------------|--------------|
| 0.80820047  | -2.292180e-01 | 6.452973e-01 | 0.9997779456 | -0.6417649745 | 0.1848170353 | 0.83807199 | 1.886857e-03  | 0.996512195  | 0.9988193 | 6.071102e-01  | 0.2830971356 |
| 0.77869908  | -9.037554e-04 | 5.037077e-01 | 0.9997779456 | -0.2666948598 | 0.0588612635 | 0.83807199 | 8.296835e-03  | 0.935510324  | 0.9986411 | -6.67855e-02  | 0.6155851564 |
| 0.81552683  | 2.822131e-01  | 2.717339e-01 | 0.9997779456 | 0.8525465045  | 0.2929674824 | 0.84915316 | 4.184420e-01  | 0.312450201  | 0.9982883 | -5.239261e-02 | 0.831431185  |
| 0.77869908  | 4.982487e-02  | 2.196426e-01 | 0.9997779456 | -0.1916812141 | 0.0857695903 | 0.83807199 | -1.085182e-01 | 0.104151776  | 0.9982883 | 1.280996e-02  | 0.9119113045 |
| 0.97522657  | 1.858962e-03  | 4.942400e-01 | 0.9997779456 | -0.1403942072 | 0.2893052915 | 0.84915316 | -4.678196e-02 | 0.669581659  | 0.9982883 | -5.189509e-02 | 0.6794121680 |
| 0.955558280 | -1.572363e-01 | 8.014591e-01 | 0.9997779456 | -0.4897429485 | 0.1161579435 | 0.83807199 | -1.587029e-01 | 0.429686853  | 0.9982883 | 3.312679e-01  | 0.1069105057 |
| 0.88636459  | 2.484453e-01  | 1.119043e-01 | 0.9997779456 | 0.0444766231  | 0.8857324966 | 0.97215753 | 2.305993e-01  | 0.221462213  | 0.9982883 | 8.490389e-03  | 0.9753100040 |
| 0.97273515  | -1.732231e+00 | 7.887713e-01 | 0.9997779456 | -0.3286759747 | 0.7803117391 | 0.95657490 | 1.842103e+00  | 0.227892325  | 0.9982883 | -2.145486e+00 | 0.1621424114 |
| 0.87292023  | -3.656410e-02 | 6.211200e-01 | 0.9997779456 | -0.2340046568 | 0.1216415113 | 0.83807199 | -2.549641e-03 | 0.981643275  | 0.9986411 | 5.498154e-02  | 0.7337418914 |
| 0.81804251  | 2.021911e-02  | 4.808995e-01 | 0.9997779456 | 0.2100111231  | 0.7048212400 | 0.94482995 | -2.126555e-01 | 0.561495227  | 0.9982883 | -5.524368e-01 | 0.2267702741 |
| 0.77869908  | -2.541038e-01 | 7.840701e-01 | 0.9997779456 | 0.6676770761  | 0.0540758177 | 0.83664873 | 5.216080e-01  | 0.092485625  | 0.9982883 | -6.39801e-01  | 0.1767978568 |
| 0.97185522  | 1.615905e-02  | 4.538254e-01 | 0.9997779456 | 0.4813295138  | 0.0812240425 | 0.83807199 | 1.400742e-01  | 0.309427387  | 0.9982883 | -7.638411e-02 | 0.7491309757 |
| 0.97273515  | 6.820855e-01  | 1.150135e-01 | 0.9997779456 | -0.3502556424 | 0.4931655710 | 0.90612020 | -7.328379e-01 | 0.455569039  | 0.9982883 | -4.167202e-01 | 0.3983428003 |
| 0.96804147  | 6.593691e-01  | 5.062850e-03 | 0.9997779456 | -0.1054762127 | 0.7074165866 | 0.94482995 | 2.509696e-01  | 0.285728834  | 0.9982883 | 4.765030e-01  | 0.3272700500 |
| 0.77869908  | -1.038048e-02 | 5.311448e-01 | 0.9997779456 | -0.1458602081 | 0.3294289544 | 0.85754495 | -1.641668e-01 | 0.249855015  | 0.9982883 | 4.360054e-02  | 0.7807651387 |
| 0.81163165  | -6.315645e-01 | 8.939477e-01 | 0.9997779456 | 0.0082793539  | 0.9621477603 | 0.99380888 | -8.423769e-02 | 0.752913964  | 0.9982883 | -2.537687e-01 | 0.1947106911 |
| 0.77869908  | -5.659942e-02 | 6.558751e-01 | 0.9997779456 | -0.3940008967 | 0.0267743976 | 0.64586404 | 3.663556e-02  | 0.733924296  | 0.9982883 | -1.941997e-01 | 0.1252413921 |
| 0.80820047  | 3.626846e-01  | 3.224328e-01 | 0.9997779456 | 0.9528222714  | 0.3021508387 | 0.84915316 | 5.410502e-01  | 0.497755223  | 0.9982883 | 4.517393e-01  | 0.6422514607 |
| 0.79578964  | 1.390937e-01  | 3.764516e-01 | 0.9997779456 | 0.2839878076  | 0.5373678768 | 0.90738044 | 1.928889e-01  | 0.587914567  | 0.9982883 | -1.312915e-02 | 0.9756851076 |
| 0.98226159  | -8.511723e-02 | 5.531156e-01 | 0.9997779456 | 0.7032053520  | 0.3771429915 | 0.87916124 | 2.003157e-01  | 0.673242626  | 0.9982883 | -1.131905e-01 | 0.7945602965 |
| 0.77869908  | -1.239261e-01 | 9.160274e-01 | 0.9997779456 | -0.0521646577 | 0.5192301801 | 0.90612020 | 1.516045e-02  | 0.855520650  | 0.9982883 | 1.081510e-01  | 0.3237161371 |
| 0.98731161  | 6.857890e-02  | 2.793389e-01 | 0.9997779456 | -0.0961801972 | 0.5518703959 | 0.91608209 | -1.465911e-01 | 0.196968594  | 0.9982883 | -1.564319e-01 | 0.3986662461 |
| 0.91950332  | 4.913636e-02  | 4.158262e-01 | 0.9997779456 | 0.2322601986  | 0.4887622762 | 0.90612020 | 3.686818e-02  | 0.889100779  | 0.9982883 | -3.519796e-02 | 0.9189772181 |
| 0.77869908  | 1.220917e-01  | 2.947428e-01 | 0.9997779456 | 0.0857939608  | 0.6897511330 | 0.94482995 | -2.372168e-01 | 0.229423725  | 0.9982883 | 2.463221e-02  | 0.9202820604 |
| 0.89512661  | 1.954109e+00  | 1.439461e-01 | 0.9997779456 | 4.9918894721  | 0.1788025726 | 0.83807199 | 4.413458e+00  | 0.131238123  | 0.9982883 | -3.814867e+00 | 0.1368992754 |
| 0.85691049  | -5.835495e-02 | 6.361093e-01 | 0.9997779456 | 0.0393109122  | 0.8196839593 | 0.95972154 | -1.709105e-01 | 0.1817197843 | 0.9982883 | 2.920592e-01  | 0.1614214414 |
| 0.97185522  | -2.354022e-01 | 9.522244e-01 | 0.9997779456 | -0.0545129583 | 0.7354959179 | 0.94712279 | -1.333142e-01 | 0.237557258  | 0.9982883 | -8.899465e-02 | 0.5236882194 |
| 0.77869908  | 2.235689e-02  | 4.098325e-01 | 0.9997779456 | -0.1065511137 | 0.3621335491 | 0.87404187 | -2.193012e-02 | 0.780771121  | 0.9982883 | 7.785024e-02  | 0.5244060038 |
| 0.88273364  | 9.620939e-01  | 1.042804e-01 | 0.9997779456 | 2.2482906004  | 0.2070706200 | 0.83807199 | 1.241969e+00  | 0.129518018  | 0.9982883 | -9.106340e-01 | 0.2084964356 |
| 0.84600172  | -9.095411e-02 | 8.156174e-01 | 0.9997779456 | -0.0914652456 | 0.3864398376 | 0.87916124 | 1.303261e-01  | 0.169612978  | 0.9982883 | 2.310647e-02  | 0.8347781855 |
| 0.77869908  | -1.289245e-01 | 7.721726e-01 | 0.9997779456 | -0.4261471783 | 0.0004360209 | 0.09450935 | -1.142257e-02 | 0.926121769  | 0.9982883 | -8.843827e-03 | 0.9447020255 |
| 0.87099999  | -1.446842e-01 | 7.689833e-01 | 0.9997779456 | -0.2555566388 | 0.4585670348 | 0.90612020 | -5.597600e-02 | 0.793613338  | 0.9982883 | 6.265996e-02  | 0.8144556505 |
| 0.77869908  | -3.546956e-02 | 5.274104e-01 | 0.9997779456 | 0.3957861403  | 0.4619923514 | 0.90612020 | 1.730630e-01  | 0.720106925  | 0.9982883 | -1.513726e-01 | 0.7737083193 |
| 0.97273515  | -4.744627e-01 | 9.690055e-01 | 0.9997779456 | 0.0047336463  | 0.9856924117 | 0.99380888 | 1.161873e-01  | 0.545830592  | 0.9982883 | -4.062860e-01 | 0.1107001503 |
| 0.77869908  | -1.417336e-01 | 8.408729e-01 | 0.9997779456 | -0.3115822686 | 0.0003257453 | 0.09450935 | 2.098810e-02  | 0.835734504  | 0.9982883 | -4.808754e-02 | 0.7507102336 |
| 0.97522657  | 4.873172e-01  | 6.190020e-01 | 0.9997779456 | 1.7935242858  | 0.3797364343 | 0.87916124 | 6.404655e-01  | 0.434546528  | 0.9982883 | -5.668549e-01 | 0.4043217308 |
| 0.88001139  | -5.096838e-02 | 5.583684e-01 | 0.9997779456 | 0.7665293284  | 0.1105684043 | 0.83807199 | 4.213190e-01  | 0.162606074  | 0.9982883 | 4.678056e-02  | 0.9341969531 |
| 0.97051145  | 7.327051e-02  | 3.741291e-01 | 0.9997779456 | -0.0965482692 | 0.5026550086 | 0.90612020 | -1.580474e-01 | 0.442944198  | 0.9982883 | 2.727788e-01  | 0.2810133734 |
| 0.77869908  | 6.356788e-02  | 3.123020e-01 | 0.9997779456 | -0.1275036781 | 0.3147009293 | 0.84915316 | -6.485402e-02 | 0.509607295  | 0.9982883 | 6.945722e-02  | 0.6582862004 |
| 0.83725376  | -1.570105e-01 | 8.473370e-01 | 0.9997779456 | -0.0346586763 | 0.8951329210 | 0.97246977 | -1.474228e-02 | 0.922880554  | 0.9982883 | 1.470422e-01  | 0.5299311068 |
| 0.91950332  | 6.467580e-04  | 4.999814e-01 | 0.9997779456 | -0.0286000608 | 0.8599607619 | 0.96707132 | -0.13276e-02  | 0.752617533  | 0.9982883 | -1.118674e-02 | 0.9543431154 |
| 0.79213004  | 1.229421e-01  | 3.122896e-01 | 0.9997779456 | 0.4435426292  | 0.3259423142 | 0.85614181 | 1.822040e-01  | 0.375257671  | 0.9982883 | 1.615391e-01  | 0.7044407692 |
| 0.77869908  | 4.713828e-02  | 3.618968e-01 | 0.9997779456 | 0.2423736899  | 0.1605419339 | 0.83807199 | 1.277420e-01  | 0.190051796  | 0.9982883 | 1.860120e-01  | 0.3245039041 |
| 0.82862325  | 2.270246e-01  | 3.388321e-01 | 0.9997779456 | 0.1779831885  | 0.6649129240 | 0.94041014 | -7.089193e-03 | 0.988727042  | 0.9986411 | -1.193003e-01 | 0.8126192501 |
| 0.77869908  | -1.715559e-02 | 5.255436e-01 | 0.9997779456 | 0.0631400673  | 0.8448162078 | 0.96338860 | 1.075424e-01  | 0.652774692  | 0.9982883 | 1.987025e-01  | 0.5504851159 |
| 0.77869908  | -2.630175e-02 | 6.319522e-01 | 0.9997779456 | 0.0728434178  | 0.5277071512 | 0.90612020 | 5.703075e-02  | 0.360358484  | 0.9982883 | -3.502346e-02 | 0.6701428069 |
| 0.97273515  | -6.452473e-02 | 6.759300e-01 | 0.9997779456 | 0.0133977545  | 0.9460232027 | 0.98688207 | -7.091476e-02 | 0.524917602  | 0.9982883 | -9.874252e-03 | 0.9449524121 |
| 0.97050390  | -5.807340e-02 | 6.187785e-01 | 0.9997779456 | 0.0834445390  | 0.6634623620 | 0.94041014 | 1.564751e-01  | 0.289282898  | 0.9982883 | 6.117049e-02  | 0.7446356069 |
| 0.98226159  | 4.367314e-01  | 2.169950e-01 | 0.9997779456 | -1.3174571137 | 0.0071466681 | 0.42236808 | -4.703182e-01 | 0.472302087  | 0.9982883 | 1.621791e-02  | 0.8823207281 |
| 0.80820047  | 1.790794e-01  | 2.367890e-01 | 0.9997779456 | -0.2936689057 | 0.5392037912 | 0.90612020 | 8.174883e-02  | 0.750851315  | 0.9982883 | 3.111721e-01  | 0.3448031260 |
| 0.99065654  | -2.011411e-01 | 9.344380e-01 | 0.9997779456 | 0.0397615381  | 0.7331346420 | 0.94712279 | -2.887092e-02 | 0.816714271  | 0.9982883 | -2.446515e-01 | 0.1081735912 |
| 0.83683629  | -3.789122e-02 | 6.012113e-01 | 0.9997779456 | 0.0705230612  | 0.6673396811 | 0.94128342 | 5.392976e-03  | 0.973799001  | 0.9986411 | 9.269459e-02  | 0.5651892960 |
| 0.97273515  | -6.784786e-02 | 6.650004e-01 | 0.9997779456 | -0.2101616719 | 0.3803941615 | 0.87916124 | -1.564025e-01 | 0.253077262  | 0.9982883 | 2.350999e-01  | 0.2687641442 |
| 0.81163165  | -6.043996e-02 | 7.427228e-01 | 0.9997779456 | -0.1401561883 | 0.1220003733 | 0.83807199 | 5.232491e-02  | 0.513646029  | 0.9982883 | -1.772283e-02 | 0.8326587173 |
| 0.88001839  | -4.735782e-02 | 7.172891e-01 | 0.9997779456 | -0.0931470447 | 0.4102265245 | 0.89501894 | 8.303872e-03  | 0.924776463  | 0.9982883 | 4.545773e-02  | 0.5985036655 |
| 0.82862325  | -2.087417e-01 | 8.887687e-01 | 0.9997779456 | -0.0628729150 | 0.8243838742 | 0.95888686 | 1.598758e-01  | 0.350024200  | 0.9982883 | -1.048582e-01 | 0.6373290247 |
| 0.92890486  | 1.022530e+00  | 2.410452e-02 | 0.9997779456 | 1.6187537206  | 0.1804789883 | 0.83807199 | 8.962126e-01  | 0.092932894  | 0.9982883 | -8.433810e-01 | 0.0706620545 |
| 0.77869908  | 2.732511e-01  | 2.199537e-01 | 0.9997779456 | 0.5118028689  | 0.2979457202 | 0.84915316 | 2.417778e-01  | 0.508270783  | 0.9982883 | 1.621791e-01  | 0.7216482865 |
| 0.77869908  | 4.705783e-01  | 8.507960e-02 | 0.9997779456 | -0.3429619372 | 0.3041451456 | 0.84915316 | 3.579762e-01  | 0.222695900  | 0.9982883 | -1.953033e-01 | 0.5492546181 |
| 0.83725376  | -7.216749e-02 | 7.574937e-01 | 0.9997779456 | -0.2114675670 | 0.0733292103 | 0.83807199 | -7.821152e-02 | 0.393919251  | 0.9982883 | 5.759799e-02  | 0.6150869967 |
| 0.77869908  | 2.471137e-02  | 3.744302e-01 | 0.9997779456 | -0.0697647364 | 0.4261612549 | 0.90454000 | 2.820091e-02  | 0.644732606  | 0.9982883 | 7.258072e-02  | 0.3304811936 |
| 0.89273364  | -1.409260e-02 | 5.347586e-01 | 0.9997779456 | -0.0370266921 | 0.8360175    |            |               |              |           |               |              |

|            |               |              |              |               |              |            |               |             |           |               |              |
|------------|---------------|--------------|--------------|---------------|--------------|------------|---------------|-------------|-----------|---------------|--------------|
| 0.96804147 | 1.606053e-01  | 1.782528e-01 | 0.9997779456 | 0.0876049159  | 0.6549398591 | 0.93854411 | 7.726059e-02  | 0.667772796 | 0.9982883 | 5.641133e-02  | 0.7219843181 |
| 0.77869908 | -1.119766e-01 | 8.134124e-01 | 0.9997779456 | -0.1323685283 | 0.3364014205 | 0.85880449 | -7.752483e-02 | 0.538762208 | 0.9982883 | -1.290287e-01 | 0.2948373302 |
| 0.90482806 | -8.195204e-03 | 5.370831e-01 | 0.9997779456 | 0.0731479752  | 0.4430632933 | 0.90612020 | -5.014513e-02 | 0.496099170 | 0.9982883 | 8.9175704e-03 | 0.9051036254 |
| 0.77869908 | 2.403639e-01  | 1.705216e-01 | 0.9997779456 | 0.3004871579  | 0.2843083444 | 0.84915316 | 2.097747e-01  | 0.378488941 | 0.9982883 | 5.098559e-02  | 0.8930406754 |
| 0.95284371 | -1.430141e-02 | 5.731284e-01 | 0.9997779456 | -0.1147603446 | 0.3721190127 | 0.87664366 | -1.755459e-02 | 0.804600982 | 0.9982883 | -6.411079e-02 | 0.5325168373 |
| 0.77869908 | -8.431727e-02 | 8.195382e-01 | 0.9997779456 | -0.1772907612 | 0.3714580691 | 0.87664366 | 1.616467e-02  | 0.868705972 | 0.9982883 | -6.995734e-02 | 0.5736417689 |
| 0.93081046 | -1.088100e-01 | 9.217058e-01 | 0.9997779456 | -0.0571153753 | 0.5957082267 | 0.92532140 | 1.466443e-02  | 0.835896452 | 0.9982883 | -4.695732e-02 | 0.6461753057 |
| 0.88203342 | -8.118327e-02 | 8.388630e-01 | 0.9997779456 | -0.0436045391 | 0.6984181328 | 0.94482995 | 5.861108e-02  | 0.461204138 | 0.9982883 | -1.713972e-02 | 0.8924156958 |
| 0.89512661 | 1.049923e-01  | 3.304482e-01 | 0.9997779456 | -0.1570401762 | 0.5270791583 | 0.90612020 | 1.288429e-01  | 0.531748065 | 0.9982883 | 1.975815e-01  | 0.4430043696 |
| 0.77869908 | -1.280638e-02 | 5.613007e-01 | 0.9997779456 | -0.1385649648 | 0.0646451958 | 0.83807199 | -8.645858e-02 | 0.165797422 | 0.9982883 | -3.674002e-02 | 0.6047663950 |
| 0.79972808 | -6.030483e-02 | 6.216520e-01 | 0.9997779456 | -0.0322194851 | 0.8091057211 | 0.95972154 | -9.513368e-02 | 0.603579240 | 0.9982883 | -2.052588e-01 | 0.2634029979 |
| 0.77869908 | -5.777231e-02 | 6.022646e-01 | 0.9997779456 | -0.1273173275 | 0.6433383585 | 0.93854411 | 1.038443e-02  | 0.948584807 | 0.9986411 | -2.567148e-01 | 0.3502932576 |
| 0.87292023 | 7.912129e-02  | 2.680092e-01 | 0.9997779456 | -0.3417925441 | 0.0738951758 | 0.83807199 | -1.698719e-01 | 0.205611568 | 0.9982883 | 1.382551e-01  | 0.5974760746 |
| 0.92004650 | -4.593721e-02 | 5.837568e-01 | 0.9997779456 | 0.3069950632  | 0.4488987820 | 0.90612020 | 4.444815e-01  | 0.067370549 | 0.9982883 | -1.299259e-01 | 0.6022386483 |
| 0.96804147 | 5.759900e-02  | 3.897670e-01 | 0.9997779456 | 0.4132174282  | 0.2067318398 | 0.83807199 | 1.380983e-01  | 0.490850870 | 0.9982883 | 3.045887e-01  | 0.2026676197 |
| 0.77869908 | 4.539963e-02  | 4.741058e-01 | 0.9997779456 | 0.3084833273  | 0.6372924959 | 0.93852299 | 1.070422e-01  | 0.874449479 | 0.9982883 | -2.156946e-01 | 0.7393094736 |
| 0.98226159 | -1.931303e-01 | 8.337561e-01 | 0.9997779456 | 0.1849591248  | 0.1809584581 | 0.83807199 | 6.067766e-02  | 0.723530146 | 0.9982883 | -1.132225e-01 | 0.6144577098 |
| 0.90482806 | -8.687217e-02 | 7.953475e-01 | 0.9997779456 | -0.2050307770 | 0.0220189079 | 0.60526393 | -7.914133e-02 | 0.446930945 | 0.9982883 | -1.307998e-01 | 0.3980775367 |
| 0.86909435 | 6.341683e-02  | 4.202077e-01 | 0.9997779456 | 0.7315355641  | 0.1735582486 | 0.83807199 | 2.209587e-01  | 0.385295879 | 0.9982883 | -1.391916e-02 | 0.9737313496 |
| 0.77869908 | 2.604882e-01  | 3.177822e-01 | 0.9997779456 | 0.9369537361  | 0.1858883892 | 0.83807199 | 3.786012e-01  | 0.483160813 | 0.9982883 | 1.181277e-01  | 0.8732444279 |
| 0.89369078 | 1.032368e-01  | 3.057609e-01 | 0.9997779456 | -0.1413211877 | 0.4558683773 | 0.90612020 | -2.235490e-02 | 0.907740930 | 0.9982883 | -0.348949e-01 | 0.1168359250 |
| 0.89369078 | -8.80502e-02  | 9.010103e-01 | 0.9997779456 | -0.0742438927 | 0.5153571405 | 0.90612020 | 5.586755e-02  | 0.343232296 | 0.9982883 | -1.843672e-02 | 0.8261890771 |
| 0.83140044 | -4.568826e-02 | 6.727292e-01 | 0.9997779456 | 0.0674900236  | 0.609890267  | 0.93042774 | 6.889553e-02  | 0.430608900 | 0.9982883 | -1.024198e-01 | 0.2737641921 |
| 0.99969967 | 2.282307e-02  | 4.175344e-01 | 0.9997779456 | 0.0429133750  | 0.6439724458 | 0.93854411 | 7.503347e-02  | 0.387511092 | 0.9982883 | -1.372873e-01 | 0.2452260740 |
| 0.87292023 | -8.526091e-02 | 8.185558e-01 | 0.9997779456 | -0.1186506288 | 0.3121675924 | 0.84915316 | 4.181074e-02  | 0.604001705 | 0.9982883 | -3.630133e-02 | 0.7332323585 |
| 0.77869908 | -2.065429e-02 | 5.981625e-01 | 0.9997779456 | -0.0473857530 | 0.6975202253 | 0.94482995 | 7.211090e-03  | 0.921555456 | 0.9982883 | 9.790352e-02  | 0.3672749750 |
| 0.81163165 | 1.966502e-01  | 3.178904e-02 | 0.9997779456 | 0.2158939332  | 0.1660645033 | 0.83807199 | 1.190926e-01  | 0.253031663 | 0.9982883 | 4.193026e-01  | 0.0032263859 |
| 0.92876201 | 5.906815e-02  | 3.419949e-01 | 0.9997779456 | -0.2083431401 | 0.1085002179 | 0.83807199 | 6.103656e-02  | 0.623652711 | 0.9982883 | 1.834966e-01  | 0.3737765026 |
| 0.77869908 | 3.381118e-01  | 9.548002e-02 | 0.9997779456 | -0.3798548226 | 0.1245185836 | 0.83807199 | -5.478439e-01 | 0.133352109 | 0.9982883 | -3.066789e-01 | 0.4595201855 |
| 0.77869908 | 7.690920e-02  | 1.408517e-01 | 0.9997779456 | 0.0636361521  | 0.6087963135 | 0.93042774 | 1.039575e-01  | 0.127264823 | 0.9982883 | 7.404022e-02  | 0.3762875811 |
| 0.81163165 | 1.585817e-01  | 1.123114e-01 | 0.9997779456 | -0.0589756948 | 0.6292087979 | 0.93766229 | -5.212920e-02 | 0.801180280 | 0.9982883 | -9.508749e-02 | 0.4390140025 |
| 0.83731157 | 2.749861e-01  | 1.590528e-02 | 0.9997779456 | 0.2902981322  | 0.1328246309 | 0.83807199 | 2.273824e-02  | 0.842405890 | 0.9982883 | -1.080602e-01 | 0.5672131798 |
| 0.77869908 | -7.847602e-02 | 5.460559e-01 | 0.9997779456 | -0.8637506822 | 0.0514136569 | 0.83664873 | -1.337141e+00 | 0.030360649 | 0.9982883 | -1.796054e+00 | 0.0012180367 |
| 0.81552863 | -2.664524e-01 | 0.080878e-01 | 0.9997779456 | 0.5222893679  | 0.478269604  | 0.90612020 | 6.940336e-01  | 0.382406354 | 0.9982883 | -3.123837e-01 | 0.7026064005 |
| 0.04829222 | 5.183356e-02  | 2.934999e-01 | 0.9997779456 | -0.0471706176 | 0.6549761268 | 0.93854411 | 1.444520e-01  | 0.063817383 | 0.9982883 | 2.383456e-02  | 0.8016557030 |
| 0.77869908 | -4.563450e-03 | 5.203249e-01 | 0.9997779456 | -0.0214483603 | 0.7484007236 | 0.95249818 | -8.802192e-02 | 0.158577998 | 0.9982883 | -2.552828e-02 | 0.6615648013 |
| 0.81163165 | -1.981528e-03 | 5.072009e-01 | 0.9997779456 | 0.0231752460  | 0.8792811839 | 0.96847881 | 1.523788e-01  | 0.110512589 | 0.9982883 | -1.395431e-03 | 0.9919270755 |
| 0.77869908 | 1.347272e-01  | 1.055975e-01 | 0.9997779456 | -0.1311828154 | 0.3693744291 | 0.87664366 | 4.270397e-02  | 0.608037799 | 0.9982883 | -2.520252e-03 | 0.9741185725 |
| 0.96804147 | 6.328180e-02  | 3.409309e-01 | 0.9997779456 | 0.0764862907  | 0.4543299934 | 0.90612020 | 1.733891e-01  | 0.188579774 | 0.9982883 | 2.177914e-01  | 0.1783089018 |
| 0.77869908 | -2.275149e-03 | 5.165307e-01 | 0.9997779456 | 0.0366988410  | 0.5549515550 | 0.91608209 | 4.877748e-02  | 0.341726821 | 0.9982883 | 5.745064e-02  | 0.2384407711 |
| 0.82862325 | -1.098502e-01 | 7.041812e-01 | 0.9997779456 | 0.1104303242  | 0.6546750920 | 0.93854411 | 4.986135e-02  | 0.787038390 | 0.9982883 | -4.179833e-02 | 0.8870753731 |
| 0.77869908 | -3.165475e-02 | 6.553941e-01 | 0.9997779456 | -0.0756274404 | 0.2367006914 | 0.84413548 | -5.214560e-02 | 0.429458184 | 0.9982883 | 2.064489e-02  | 0.8250945264 |
| 0.87099999 | -6.001142e-02 | 8.255832e-01 | 0.9997779456 | -0.0780300350 | 0.3980424509 | 0.88596024 | -3.593175e-02 | 0.550940763 | 0.9982883 | 9.574853e-03  | 0.9113408434 |
| 0.77869908 | 1.352519e-01  | 3.928381e-01 | 0.9997779456 | 0.5608773141  | 0.3028477445 | 0.84915316 | 1.997787e-01  | 0.639895282 | 0.9982883 | -5.650644e-02 | 0.9106581718 |
| 0.93531428 | -1.865549e-01 | 9.420411e-01 | 0.9997779456 | 0.0324343414  | 0.1856981276 | 0.95972154 | -8.561973e-02 | 0.459774383 | 0.9982883 | -1.915338e-01 | 0.0616131631 |
| 0.83563937 | -3.448022e-02 | 6.270162e-01 | 0.9997779456 | -0.1340908578 | 0.2446387867 | 0.84413548 | -1.899295e-02 | 0.841450025 | 0.9982883 | 1.897404e-01  | 0.0802116176 |
| 0.97050390 | -2.153278e-01 | 9.796839e-01 | 0.9997779456 | -0.1290379296 | 0.1728432360 | 0.83807199 | -2.448339e-02 | 0.806245889 | 0.9982883 | -1.446422e-02 | 0.9048731397 |
| 0.77869908 | -4.449628e-02 | 5.532328e-01 | 0.9997779456 | -0.2333271912 | 0.4763225850 | 0.90612020 | 8.236246e-02  | 0.728531886 | 0.9982883 | -9.780265e-02 | 0.7641470759 |
| 0.98996967 | 5.315483e-02  | 2.433080e-01 | 0.9997779456 | 0.1215366625  | 0.1700020788 | 0.83807199 | 5.722655e-02  | 0.439834266 | 0.9982883 | -4.411330e-03 | 0.9685229844 |
| 0.97273515 | -1.506743e-01 | 8.453827e-01 | 0.9997779456 | -0.1359383525 | 0.4090382877 | 0.89501694 | 3.318090e-02  | 0.784210131 | 0.9982883 | -1.814021e-01 | 0.3602032325 |
| 0.77869908 | -5.605423e-02 | 6.753129e-01 | 0.9997779456 | -0.0125293796 | 0.9123738825 | 0.97964868 | 1.320575e-01  | 0.219060062 | 0.9982883 | -7.905234e-02 | 0.6505454388 |
| 0.77869908 | 1.022155e-01  | 1.598844e-01 | 0.9997779456 | -0.0187581909 | 0.8672717121 | 0.96707132 | 6.263742e-02  | 0.456677498 | 0.9982883 | 5.150645e-02  | 0.7288795283 |
| 0.81804257 | -9.241004e-02 | 8.057996e-01 | 0.9997779456 | -0.2787918496 | 0.1271126562 | 0.83807199 | -1.410184e-01 | 0.125291856 | 0.9982883 | 8.689847e-02  | 0.4070242239 |
| 0.80653217 | -1.622698e-01 | 8.779886e-01 | 0.9997779456 | -0.3125664538 | 0.1448812171 | 0.83807199 | 7.560565e-02  | 0.580037425 | 0.9982883 | -3.707533e-02 | 0.7906894234 |
| 0.95284371 | -1.308243e-01 | 9.085194e-01 | 0.9997779456 | -0.1710468671 | 0.0987225124 | 0.83807199 | 1.022495e-01  | 0.195018289 | 0.9982883 | -7.210753e-02 | 0.4997229205 |
| 0.84600172 | -3.664711e-02 | 5.721187e-01 | 0.9997779456 | 0.0563044295  | 0.8333582613 | 0.96288315 | -2.467344e-03 | 0.988110834 | 0.9986411 | -1.781550e-02 | 0.9321531138 |
| 0.77869908 | 1.356155e-02  | 4.462721e-01 | 0.9997779456 | -0.1613171788 | 0.2970012415 | 0.84915316 | -1.147992e-01 | 0.103306714 | 0.9982883 | -7.224290e-02 | 0.5825439096 |
| 0.97273515 | -3.316406e-01 | 9.320695e-01 | 0.9997779456 | 0.0083138672  | 0.9570727829 | 0.99380888 | 4.532274e-02  | 0.791032413 | 0.9982883 | -1.603298e-01 | 0.3509336531 |
| 0.77869908 | 4.526205e-02  | 2.603760e-01 | 0.9997779456 | -0.0493681636 | 0.5412608040 | 0.91146188 | 6.383169e-02  | 0.229618949 | 0.9982883 | 1.062618e-01  | 0.0271242952 |
| 0.89273264 | 1.537517e-01  | 1.868589e-01 | 0.9997779456 | -0.1651606004 | 0.5054583504 | 0.90612020 | 1.047621e-01  | 0.513900157 | 0.9982883 | 1.318499e-01  | 0.2703874472 |
| 0.95472383 | 1.978539e-01  | 3.810370e-01 | 0.9997779456 | 0.8390501105  | 0.4791466067 | 0.90612020 | 1.197076e+00  | 0.103109596 | 0.9982883 | 3.071246e-02  | 0.9738872467 |
| 0.98996967 | -3.267399e-02 | 5.847381e-01 | 0.9997779456 | 0.4686250838  | 0.1053533321 | 0.83807199 | 1.564972e-01  | 0.278995467 | 0.99828   |               |              |



|            |               |              |              |               |              |            |               |             |           |                |              |
|------------|---------------|--------------|--------------|---------------|--------------|------------|---------------|-------------|-----------|----------------|--------------|
| 0.77869908 | -3.217480e-02 | 6.852103e-01 | 0.9997779456 | 0.0280055780  | 0.7978887283 | 0.95972154 | 2.791955e-02  | 0.667594705 | 0.9982883 | 5.722247e-02   | 0.5549846796 |
| 0.92890486 | -1.051146e-02 | 5.566224e-01 | 0.9997779456 | 0.0245821920  | 0.7637114546 | 0.95505354 | 6.188058e-02  | 0.377537289 | 0.9982883 | 8.393958e-02   | 0.1619955855 |
| 0.77869908 | 3.849267e-02  | 4.231217e-01 | 0.9997779456 | 0.0853414883  | 0.7568156229 | 0.95505354 | 3.648648e-02  | 0.869702998 | 0.9982883 | -1.413302e-01  | 0.5124617082 |
| 0.77869908 | 1.540772e-02  | 4.647284e-01 | 0.9997779456 | -0.0018510910 | 0.9202041557 | 0.99454839 | -1.718993e-02 | 0.913236872 | 0.9982883 | -8.288671e-02  | 0.6971097741 |
| 0.80820047 | -1.287329e-01 | 8.371665e-01 | 0.9997779456 | -0.1205267125 | 0.3713019101 | 0.87664366 | 2.881547e-02  | 0.768079940 | 0.9982883 | 9.820401e-02   | 0.4266347552 |
| 0.90802583 | -7.801097e-02 | 7.401674e-01 | 0.9997779456 | -0.0163464623 | 0.9431458435 | 0.98742107 | 9.146300e-02  | 0.466533883 | 0.9982883 | 3.822874e-01   | 0.0176827262 |
| 0.97273515 | -2.766280e-01 | 9.481589e-01 | 0.9997779456 | 0.0052788886  | 0.9787417439 | 0.99380888 | 3.218347e-02  | 0.802358638 | 0.9982883 | -1.471291e-01  | 0.1984444753 |
| 0.77869908 | -6.544979e-02 | 7.994849e-01 | 0.9997779456 | -0.0553346213 | 0.5080018500 | 0.90612020 | 5.081166e-02  | 0.493861840 | 0.9982883 | 7.27218e-02    | 0.3934224911 |
| 0.77869908 | -7.726983e-02 | 8.414786e-01 | 0.9997779456 | -0.0236453114 | 0.7392200305 | 0.94973704 | 6.481795e-02  | 0.208066472 | 0.9982883 | -9.157379e-02  | 0.3352564789 |
| 0.96804147 | 2.859371e-01  | 1.748314e-02 | 0.9997779456 | 0.2084695807  | 0.1646091920 | 0.83807199 | 9.872228e-02  | 0.396188988 | 0.9982883 | 2.708816e-01   | 0.0384132554 |
| 0.86909435 | -9.071675e-03 | 5.296883e-01 | 0.9997779456 | -0.0161197183 | 0.8613653562 | 0.96707132 | 4.424427e-02  | 0.649880300 | 0.9982883 | 5.095971e-02   | 0.8124193825 |
| 0.77869908 | 1.440324e-01  | 1.667633e-01 | 0.9997779456 | 0.1354831330  | 0.3093556390 | 0.84915316 | -3.643760e-02 | 0.763007294 | 0.9982883 | -8.256467e-04  | 0.9960254728 |
| 0.95284371 | 3.567739e-01  | 1.203255e-01 | 0.9997779456 | -0.0508460224 | 0.8973481181 | 0.97363552 | 2.288504e-02  | 0.828207933 | 0.9984111 | -4.658752e-01  | 0.1822906666 |
| 0.77869908 | 9.292229e-02  | 1.542315e-01 | 0.9997779456 | -0.0974088728 | 0.6116263557 | 0.93042774 | 1.055098e-02  | 0.900824184 | 0.9982883 | 1.333469e-01   | 0.1185485645 |
| 0.81804251 | 3.174834e-02  | 4.039832e-01 | 0.9997779456 | -0.1380023006 | 0.3039099400 | 0.84915316 | 1.878622e-03  | 0.98640833  | 0.9984111 | 0.176861e-01   | 0.3971335956 |
| 0.97273515 | 4.666039e-02  | 3.983139e-01 | 0.9997779456 | 0.2291114354  | 0.4790436452 | 0.90612020 | 1.934989e-01  | 0.263253525 | 0.9982883 | 1.381481e-01   | 0.3894393428 |
| 0.77869908 | 3.054296e-02  | 3.684748e-01 | 0.9997779456 | -0.0194589560 | 0.8381344584 | 0.96321135 | 5.212266e-02  | 0.465598163 | 0.9982883 | 1.108506e-01   | 0.0884373135 |
| 0.95284371 | 4.465479e-02  | 3.141150e-01 | 0.9997779456 | 0.0383828246  | 0.7441068060 | 0.95148651 | 1.029122e-02  | 0.920254241 | 0.9982883 | 7.652061e-02   | 0.5025895261 |
| 0.86909435 | 1.072276e-01  | 2.978944e-01 | 0.9997779456 | -0.1787997441 | 0.5023303519 | 0.90612020 | -3.759490e-01 | 0.030070803 | 0.9982883 | 2.794971e-02   | 0.8993604668 |
| 0.88581308 | -8.383802e-02 | 7.556616e-01 | 0.9997779456 | -0.0199031146 | 0.8761657603 | 0.96947881 | -3.711778e-02 | 0.732798771 | 0.9982883 | 1.704009e-01   | 0.2737262458 |
| 0.77869908 | 4.707595e-02  | 4.413418e-01 | 0.9997779456 | 0.3478765753  | 0.3277131054 | 0.85754449 | 9.218281e-02  | 0.740343348 | 0.9982883 | -1.051372e-01  | 0.6697633114 |
| 0.77869908 | -4.026519e-02 | 6.317768e-01 | 0.9997779456 | -0.0015743528 | 0.9898490903 | 0.99380888 | -8.828277e-03 | 0.932063488 | 0.9984111 | 1.309439e-01   | 0.3197400905 |
| 0.97273515 | -2.548180e-01 | 8.491923e-01 | 0.9997779456 | 0.0984006132  | 0.5480483270 | 0.91608209 | -1.024056e-01 | 0.660683974 | 0.9982883 | 1.898634e-02   | 0.9211801621 |
| 0.97273515 | -4.088561e-01 | 9.921687e-01 | 0.9997779456 | -0.1557274297 | 0.3297773501 | 0.85754449 | -8.167338e-02 | 0.582979149 | 0.9982883 | 5.328199e-02   | 0.8293880206 |
| 0.77869908 | -3.185769e-02 | 6.596388e-01 | 0.9997779456 | -0.0921421136 | 0.3505203915 | 0.86676800 | 8.315716e-03  | 0.878967894 | 0.9982883 | 1.087120e-02   | 0.8935352521 |
| 0.90482806 | -1.668384e-01 | 9.480996e-01 | 0.9997779456 | -0.1824510245 | 0.1527490488 | 0.83807199 | -6.687013e-02 | 0.462184815 | 0.9982883 | -1.480708e-01  | 0.0480278737 |
| 0.93368199 | -7.709291e-02 | 8.673673e-01 | 0.9997779456 | -0.1335658883 | 0.0113074125 | 0.46180258 | -6.377596e-02 | 0.270856327 | 0.9982883 | 7.551818e-02   | 0.3158761942 |
| 0.77869908 | 6.485578e-02  | 1.209774e-01 | 0.9997779456 | -0.0313839880 | 0.6988567212 | 0.94482995 | 1.948634e-02  | 0.686915013 | 0.9982883 | 3.405066e-02   | 0.7087784773 |
| 0.89512661 | -8.504297e-02 | 7.792560e-01 | 0.9997779456 | -0.2005919809 | 0.1477893426 | 0.83807199 | -3.074925e-02 | 0.714215263 | 0.9982883 | -1.559337e-01  | 0.1960432182 |
| 0.94189574 | -1.378861e-01 | 9.153256e-01 | 0.9997779456 | -0.0963318907 | 0.4704242057 | 0.90612020 | -1.340232e-02 | 0.849706149 | 0.9982883 | -8.715609e-03  | 0.9018617800 |
| 0.81163165 | 5.050598e-01  | 9.564222e-02 | 0.9997779456 | 1.2494473146  | 0.2214211993 | 0.83807199 | 5.838921e-01  | 0.137442758 | 0.9982883 | -1.325531e-01  | 0.7070090464 |
| 0.89369078 | -2.221099e-01 | 9.285892e-01 | 0.9997779456 | 0.0284153536  | 0.9268364793 | 0.98469702 | -7.213813e-02 | 0.601821996 | 0.9982883 | 1.025195e-02   | 0.9637866780 |
| 0.77869908 | 6.275008e-02  | 3.441291e-01 | 0.9997779456 | -0.1550506111 | 0.2965364578 | 0.84915316 | -4.589335e-02 | 0.765430036 | 0.9982883 | 2.199009e-02   | 0.3107750260 |
| 0.81552863 | -1.000629e-01 | 9.118837e-01 | 0.9997779456 | -0.0163350591 | 0.8910244371 | 0.97246977 | 6.584292e-02  | 0.376113220 | 0.9982883 | -9.531555e-03  | 0.9170862700 |
| 0.86909435 | 7.179187e-02  | 2.181886e-01 | 0.9997779456 | -0.2234183772 | 0.1668917318 | 0.83807199 | -8.394823e-03 | 0.945650790 | 0.9984111 | 1.940334e-01   | 0.3143004732 |
| 0.94675587 | -3.192854e-01 | 7.627327e-01 | 0.9997779456 | -0.7135665922 | 0.0444170556 | 0.82032750 | 5.806776e-02  | 0.827006507 | 0.9982883 | 2.201970e-02   | 0.8006970193 |
| 0.78646917 | -1.350897e-01 | 7.684167e-01 | 0.9997779456 | -0.2255846288 | 0.1039959676 | 0.83807199 | -1.985075e-01 | 0.268538427 | 0.9982883 | -3.878561e-01  | 0.0050901015 |
| 0.79972808 | -1.122700e-01 | 8.927545e-01 | 0.9997779456 | -0.1630173396 | 0.2297679892 | 0.84082280 | 6.529189e-03  | 0.934054508 | 0.9984111 | 1.920496e-02   | 0.8771972267 |
| 0.98998602 | -1.325245e-02 | 5.852418e-01 | 0.9997779456 | 0.2360360806  | 0.0065780906 | 0.49015301 | 7.206016e-02  | 0.290213023 | 0.9982883 | 1.779412e-01   | 0.0015474128 |
| 0.95472383 | -2.348218e-01 | 9.670200e-01 | 0.9997779456 | -0.0414556965 | 0.6788306335 | 0.94316618 | 5.118283e-02  | 0.559366721 | 0.9982883 | -2.569430e-01  | 0.0100069249 |
| 0.77869908 | 9.877863e-01  | 1.698836e-01 | 0.9997779456 | -0.2347444819 | 0.0874028879 | 0.83807199 | -1.608022e-01 | 0.101430505 | 0.9982883 | 1.618693e-01   | 0.2095895897 |
| 0.84824569 | 1.823291e-01  | 2.215033e-01 | 0.9997779456 | 0.0495265895  | 0.8446933335 | 0.96338860 | 1.779906e-01  | 0.323896893 | 0.9982883 | 3.239963e-02   | 0.8980588371 |
| 0.87099999 | -7.736806e-02 | 7.959609e-01 | 0.9997779456 | -0.0287367266 | 0.7351584785 | 0.94712279 | -9.662955e-02 | 0.324926981 | 0.9982883 | 1.183961e-01   | 0.4252511655 |
| 0.89512661 | 4.339832e-02  | 2.417394e-01 | 0.9997779456 | 0.0061418994  | 0.4624156639 | 0.90612020 | 1.128175e-01  | 0.053621108 | 0.9982883 | 2.245818e-02   | 0.8124479625 |
| 0.97185522 | -1.391516e-01 | 8.456786e-01 | 0.9997779456 | -0.1577129029 | 0.2909846873 | 0.84915316 | -9.661390e-02 | 0.434766421 | 0.9982883 | -2.474746e-01  | 0.2100754960 |
| 0.92890486 | 1.065281e-01  | 2.243406e-02 | 0.9997779456 | 0.0162441006  | 0.8808969909 | 0.96947881 | -4.491002e-03 | 0.937269591 | 0.9984111 | -1.175707e-01  | 0.2000895959 |
| 0.88203342 | -5.101227e-02 | 6.392436e-01 | 0.9997779456 | -0.1959939129 | 0.091200291  | 0.83807199 | -6.503518e-02 | 0.557677487 | 0.9982883 | 9.228876e-02   | 0.4762767433 |
| 0.77869908 | 1.387270e-01  | 9.654026e-02 | 0.9997779456 | 0.0520110957  | 0.6509274252 | 0.93854411 | 9.812833e-03  | 0.922399815 | 0.9982883 | 1.353644e-01   | 0.2157905254 |
| 0.80820047 | -7.375856e-02 | 8.641425e-01 | 0.9997779456 | -0.0751166074 | 0.428621424  | 0.90470732 | 5.163200e-02  | 0.371120342 | 0.9982883 | 1.679084e-02   | 0.8186267834 |
| 0.77869908 | -4.498724e-02 | 6.281575e-01 | 0.9997779456 | 0.0497049090  | 0.8275167649 | 0.95898696 | -1.216362e-01 | 0.447415798 | 0.9982883 | -0.907909e-01  | 0.0064457438 |
| 0.77869908 | 4.377823e-02  | 3.996885e-01 | 0.9997779456 | -0.0519161928 | 0.8170771583 | 0.95972154 | 2.324720e-02  | 0.873369794 | 0.9982883 | -3.798959e-01  | 0.0134245391 |
| 0.79578964 | 4.239596e-02  | 4.343107e-01 | 0.9997779456 | 0.2303178492  | 0.3477426202 | 0.86676800 | 2.001101e-01  | 0.408520846 | 0.9982883 | 1.535848e-01   | 0.5749601272 |
| 0.77869908 | 4.121796e-02  | 3.245531e-01 | 0.9997779456 | 0.0105831460  | 0.8933828502 | 0.97246977 | 6.379873e-02  | 0.480529567 | 0.9982883 | -7.2030717e-02 | 0.5100911895 |
| 0.77869908 | -1.804035e-02 | 5.255359e-01 | 0.9997779456 | 0.02107711653 | 0.9397456667 | 0.98648257 | -8.80226e-03  | 0.974814751 | 0.9984111 | 2.169467e-02   | 0.9199430412 |
| 0.77869908 | -1.128333e-01 | 8.298483e-01 | 0.9997779456 | -0.1504635096 | 0.2522578965 | 0.84674692 | 2.519598e-03  | 0.977771061 | 0.9984111 | 7.061023e-02   | 0.5334915795 |
| 0.89911801 | -2.093777e-01 | 8.262086e-01 | 0.9997779456 | 0.0459898914  | 0.8800288862 | 0.96947881 | -2.139906e-01 | 0.214844873 | 0.9982883 | -9.175375e-02  | 0.6147025720 |
| 0.83725376 | -1.846442e-02 | 5.585441e-01 | 0.9997779456 | -0.0622688286 | 0.6858551156 | 0.94482995 | 4.683022e-02  | 0.675203389 | 0.9982883 | 1.899586e-01   | 0.3001006139 |
| 0.83731157 | -6.479384e-03 | 5.473414e-01 | 0.9997779456 | 0.0166341119  | 0.8474400014 | 0.96338860 | 8.319020e-02  | 0.118041163 | 0.9982883 | -4.483148e-02  | 0.4340794362 |
| 0.77869908 | 2.807895e-01  | 1.381288e-01 | 0.9997779456 | 0.3218456488  | 0.3552670152 | 0.87302622 | -9.087452e-02 | 0.705298508 | 0.9982883 | 5.241035e-01   | 0.0433042186 |
| 0.87891050 | -2.674560e-02 | 6.138159e-01 | 0.9997779456 | -0.1645939674 | 0.0770010396 | 0.83807199 | -8.276789e-02 | 0.353997641 | 0.9982883 | -3.970001e-02  | 0.7551936713 |
| 0.93738259 | -8.287216e-02 | 7.964668e-01 | 0.9997779456 | 0.1466935128  | 0.2400645441 | 0.84413548 | -6.663856e-02 | 0.458771640 | 0.9982883 | 1.212205e-01   | 0.3794047894 |
| 0.88636459 | -9.225882e-02 | 8.164996e-01 | 0.9997779456 | -0.0784248699 | 0.49518820   |            |               |             |           |                |              |

|            |               |              |              |               |              |            |               |             |           |               |              |
|------------|---------------|--------------|--------------|---------------|--------------|------------|---------------|-------------|-----------|---------------|--------------|
| 0.79654908 | -7.892344e-02 | 6.747032e-01 | 0.9997779456 | 0.3562621406  | 0.3008634964 | 0.84915316 | -7.066482e-02 | 0.665926585 | 0.9982883 | 5.099822e-02  | 0.8040153138 |
| 0.95558280 | -4.414224e-02 | 6.184597e-01 | 0.9997779456 | -0.1648882888 | 0.3032098521 | 0.84915316 | -4.346049e-02 | 0.683860919 | 0.9982883 | -2.05089e-02  | 0.8482825918 |
| 0.99525047 | -1.032476e-01 | 7.491318e-01 | 0.9997779456 | 0.2264457432  | 0.2275982299 | 0.83807199 | -8.214870e-03 | 0.947494820 | 0.9986411 | -2.375903e-01 | 0.1026152596 |
| 0.87292023 | 1.010931e-01  | 1.207016e-01 | 0.9997779456 | -0.1503447287 | 0.3535727774 | 0.87067296 | -4.422824e-02 | 0.593408412 | 0.9982883 | 2.126344e-01  | 0.1087475193 |
| 0.80820047 | -2.716338e-02 | 6.178835e-01 | 0.9997779456 | 0.0023585648  | 0.9892064070 | 0.99380888 | 7.527732e-03  | 0.944204293 | 0.9986411 | -2.265393e-01 | 0.0863852825 |
| 0.94189574 | -2.011515e-01 | 9.332608e-01 | 0.9997779456 | 0.3287907658  | 0.1301756073 | 0.83807199 | -7.969098e-02 | 0.539429454 | 0.9982883 | -1.973141e-01 | 0.3141996172 |
| 0.77869908 | -7.409303e-02 | 8.645453e-01 | 0.9997779456 | -0.0268012989 | 0.8152122314 | 0.95972154 | -5.676154e-02 | 0.510067502 | 0.9982883 | 1.089908e-01  | 0.3688762427 |
| 0.97273515 | -2.455147e-01 | 9.410772e-01 | 0.9997779456 | -0.2897324566 | 0.0255951586 | 0.64586404 | -7.183318e-02 | 0.501919835 | 0.9982883 | -2.264866e-01 | 0.0781863211 |
| 0.80820047 | -8.153891e-02 | 5.578187e-01 | 0.9997779456 | 0.2532677298  | 0.6290158640 | 0.93786229 | 8.920132e-02  | 0.855253375 | 0.9982883 | -1.896050e-01 | 0.7273472996 |
| 0.95639607 | 9.671410e-02  | 3.902252e-01 | 0.9997779456 | -0.2807813966 | 0.4083165630 | 0.89501894 | 3.251555e-01  | 0.240637228 | 0.9982883 | -1.529044e-01 | 0.7380908593 |
| 0.89609137 | 5.121638e-02  | 3.876655e-01 | 0.9997779456 | -0.1068995429 | 0.5857224663 | 0.92532140 | -1.471973e-01 | 0.431783425 | 0.9982883 | -8.271682e-02 | 0.7258426262 |
| 0.99066584 | -5.316529e-01 | 9.612178e-01 | 0.9997779456 | -0.1184643367 | 0.6038414288 | 0.93042774 | -3.452441e-02 | 0.879544397 | 0.9982883 | -2.454075e-02 | 0.9238628395 |
| 0.77869908 | 6.955661e-02  | 2.802630e-01 | 0.9997779456 | -0.3214070607 | 0.1709864975 | 0.83807199 | -1.116839e-01 | 0.289010396 | 0.9982883 | -2.077128e-02 | 0.8889113068 |
| 0.77869908 | -5.320640e-03 | 5.271822e-01 | 0.9997779456 | -0.1470082538 | 0.1672115236 | 0.83807199 | 6.612428e-02  | 0.345715799 | 0.9982883 | -5.460801e-03 | 0.9505199071 |
| 0.82743594 | -1.818222e-01 | 9.960507e-01 | 0.9997779456 | -0.1962041495 | 0.1177106166 | 0.83807199 | -2.070222e-02 | 0.727038652 | 0.9982883 | -1.448412e-01 | 0.2065400836 |
| 0.79972808 | 7.822693e-02  | 2.332620e-01 | 0.9997779456 | -0.1410559641 | 0.4088611853 | 0.89501894 | -1.196938e-01 | 0.222250898 | 0.9982883 | -3.348956e-03 | 0.9671181128 |
| 0.77869908 | -7.254087e-03 | 5.168026e-01 | 0.9997779456 | -0.4015136543 | 0.0597877151 | 0.83807199 | -5.480473e-02 | 0.671389938 | 0.9982883 | 9.132655e-02  | 0.6113165935 |
| 0.99436660 | -0.532976e-02 | 5.459424e-01 | 0.9997779456 | 0.3493729221  | 0.3486236269 | 0.86676800 | 3.029289e-01  | 0.179379233 | 0.9982883 | -1.215299e-01 | 0.6645788437 |
| 0.82862325 | -7.704147e-02 | 8.452423e-01 | 0.9997779456 | -0.1417600191 | 0.1845620644 | 0.83807199 | -3.845873e-02 | 0.505954200 | 0.9982883 | -8.144858e-02 | 0.2668730373 |
| 0.77869908 | 1.053424e-01  | 4.243978e-01 | 0.9997779456 | 0.5075456509  | 0.4111635223 | 0.89501894 | 1.551347e-01  | 0.776344989 | 0.9982883 | 2.129184e-02  | 0.9720452596 |
| 0.93924745 | -5.261846e-02 | 6.649831e-01 | 0.9997779456 | -0.5441938395 | 0.0081318271 | 0.43863723 | -3.776383e-02 | 0.767641077 | 0.9982883 | 1.632496e-01  | 0.2600348452 |
| 0.93506890 | -1.379875e-01 | 7.508071e-01 | 0.9997779456 | -0.1151412730 | 0.5566943898 | 0.91608209 | 1.022292e-01  | 0.563868633 | 0.9982883 | 8.645799e-02  | 0.7527451496 |
| 0.93081046 | -1.823586e-01 | 8.935883e-01 | 0.9997779456 | -0.2166539727 | 0.1706522083 | 0.83807199 | -4.634984e-02 | 0.695051987 | 0.9982883 | 5.893897e-04  | 0.9964785151 |
| 0.93359368 | -1.707705e-01 | 8.876544e-01 | 0.9997779456 | 0.0242879300  | 0.870990555  | 0.96930573 | 1.616211e-02  | 0.909086502 | 0.9982883 | -2.927326e-01 | 0.0632407107 |
| 0.79578964 | -1.022818e-02 | 5.127600e-01 | 0.9997779456 | 0.5725446215  | 0.3404173519 | 0.85977203 | 2.829295e-01  | 0.490469531 | 0.9982883 | 1.305252e-02  | 0.9828343674 |
| 0.95472383 | -1.592700e-01 | 6.302271e-01 | 0.9997779456 | 0.5957236856  | 0.2152985809 | 0.83807199 | -1.139661e-01 | 0.780927846 | 0.9982883 | 7.999231e-03  | 0.9767196575 |
| 0.88001839 | 1.155917e-01  | 9.453376e-02 | 0.9997779456 | 0.0384036751  | 0.7040000698 | 0.94482995 | 4.888846e-02  | 0.585326324 | 0.9982883 | 1.490250e-02  | 0.8872621029 |
| 0.79213004 | -1.011640e-01 | 9.017980e-01 | 0.9997779456 | -0.0515702047 | 0.5702205322 | 0.92122660 | -4.523107e-02 | 0.500734265 | 0.9982883 | -7.551982e-02 | 0.3126268128 |
| 0.97185522 | -7.497082e-02 | 5.845992e-01 | 0.9997779456 | 0.6992276076  | 0.4369492135 | 0.90612020 | 5.090727e-02  | 0.884646770 | 0.9982883 | -1.410617e-01 | 0.6477796859 |
| 0.93650941 | -3.853907e-03 | 5.184517e-01 | 0.9997779456 | -0.0536437942 | 0.4080748797 | 0.89501894 | 1.104060e-02  | 0.846706759 | 0.9982883 | 5.602657e-02  | 0.4346863309 |
| 0.97273515 | 6.609477e-02  | 3.355325e-01 | 0.9997779456 | 0.4585002327  | 0.2508286966 | 0.84467092 | 1.113093e-01  | 0.473601820 | 0.9982883 | -1.945444e-01 | 0.2136356723 |
| 0.99066584 | 2.160062e-01  | 1.239422e-01 | 0.9997779456 | 0.3235877847  | 0.2625568506 | 0.84915316 | -2.022102e-01 | 0.237559791 | 0.9982883 | -4.48592e-01  | 0.0027274956 |
| 0.80521409 | -1.231750e-02 | 5.353053e-01 | 0.9997779456 | -0.2186109193 | 0.0736460468 | 0.83807199 | 3.728700e-02  | 0.814796124 | 0.9982883 | 1.647813e-01  | 0.3559147331 |
| 0.79578964 | 1.878395e-01  | 3.822043e-01 | 0.9997779456 | 0.2862476211  | 0.5803609090 | 0.92532140 | -2.305596e-01 | 0.754681904 | 0.9982883 | -3.741404e-01 | 0.5650863562 |
| 0.83731157 | -1.809814e-01 | 9.739694e-01 | 0.9997779456 | -0.1541597863 | 0.1850134225 | 0.83807199 | 1.947606e-02  | 0.798701192 | 0.9982883 | -5.077452e-02 | 0.6779266961 |
| 0.97273515 | -0.890166e-02 | 5.853444e-01 | 0.9997779456 | -0.0203638698 | 0.9105235078 | 0.97964668 | -2.930525e-01 | 0.081352787 | 0.9982883 | -3.211714e-01 | 0.0324852210 |
| 0.92583146 | 3.876776e-02  | 3.497113e-01 | 0.9997779456 | 0.0664034707  | 0.5909611584 | 0.92532140 | -5.363156e-03 | 0.956471980 | 0.9986411 | 2.930434e-01  | 0.0330201935 |
| 0.77869908 | -3.000152e-02 | 5.357242e-01 | 0.9997779456 | -0.1150446451 | 0.7972246113 | 0.95972154 | 2.881505e-03  | 0.992263862 | 0.9981193 | 5.745489e-01  | 0.2138378635 |
| 0.92876201 | -2.421661e-01 | 9.625391e-01 | 0.9997779456 | -0.2340338344 | 0.1209215204 | 0.83807199 | 7.394288e-02  | 0.534290108 | 0.9982883 | -9.216092e-02 | 0.4795813270 |
| 0.77869908 | -3.508810e-02 | 6.276285e-01 | 0.9997779456 | -0.0831044046 | 0.6077451593 | 0.93042774 | -8.413025e-02 | 0.358254151 | 0.9982883 | -1.289312e-01 | 0.3204547376 |
| 0.77869908 | 5.996328e-02  | 2.739496e-01 | 0.9997779456 | 0.2097109080  | 0.1016959276 | 0.83807199 | 1.757365e-01  | 0.032849972 | 0.9982883 | -3.869699e-02 | 0.6458764594 |
| 0.86909435 | -1.753371e-01 | 9.072091e-01 | 0.9997779456 | 0.1450208936  | 0.3737972946 | 0.87664366 | -3.652918e-03 | 0.971628603 | 0.9986411 | -2.703446e-01 | 0.0183863714 |
| 0.98670901 | -9.743631e-02 | 8.347783e-01 | 0.9997779456 | 0.0748618254  | 0.4747702473 | 0.90612020 | 1.233743e-01  | 0.163613896 | 0.9982883 | -1.196591e-01 | 0.0956522969 |
| 0.99066584 | -1.208327e-01 | 7.878818e-01 | 0.9997779456 | -0.0484722983 | 0.7018298510 | 0.94482995 | 7.547304e-03  | 0.950413679 | 0.9986411 | -9.274263e-02 | 0.4665053536 |
| 0.95284371 | 1.135124e-01  | 4.756286e-01 | 0.9997779456 | 0.4662760377  | 0.4984785725 | 0.97964668 | 2.529295e-01  | 0.376570193 | 0.9982883 | -2.741937e-01 | 0.4768873649 |
| 0.94990176 | -1.653480e-01 | 8.755277e-01 | 0.9997779456 | 0.0636211367  | 0.7710942736 | 0.95055354 | -6.134300e-02 | 0.669689824 | 0.9982883 | 8.589498e-02  | 0.6403630764 |
| 0.97273515 | -4.523902e-02 | 6.902634e-01 | 0.9997779456 | 0.1076219871  | 0.1817472303 | 0.83807199 | 4.536783e-02  | 0.611228522 | 0.9982883 | -1.175055e-01 | 0.1987358664 |
| 0.77869908 | -2.353939e-02 | 5.518220e-01 | 0.9997779456 | -0.1236719221 | 0.7605852945 | 0.95055354 | -1.207077e-01 | 0.555094074 | 0.9982883 | -1.577682e-01 | 0.7089589092 |
| 0.92226585 | 1.831410e-01  | 1.547910e-01 | 0.9997779456 | 0.4058036415  | 0.4051601796 | 0.89501894 | 1.644430e-01  | 0.336041456 | 0.9982883 | 2.953104e-02  | 0.8785413912 |
| 0.97273515 | 2.436487e+00  | 1.096194e-01 | 0.9997779456 | 2.8851388473  | 0.4138292545 | 0.89754931 | 7.134760e-01  | 0.638557081 | 0.9982883 | -8.687728e-01 | 0.5484788739 |
| 0.77869908 | 1.249588e-02  | 4.661047e-01 | 0.9997779456 | -0.0610505111 | 0.6479086768 | 0.93854411 | -5.733818e-02 | 0.653723838 | 0.9982883 | 1.010959e-01  | 0.6214183762 |
| 0.90482806 | -2.341614e-01 | 9.223343e-01 | 0.9997779456 | -0.4157746165 | 0.0150330782 | 0.49365173 | -1.332072e-02 | 0.912112976 | 0.9982883 | -1.937052e-01 | 0.1618213242 |
| 0.80820047 | -1.724399e-01 | 8.801499e-01 | 0.9997779456 | -0.0691367835 | 0.7271964658 | 0.94712279 | -1.034921e-01 | 0.409707516 | 0.9982883 | 2.111844e-02  | 0.9001958467 |
| 0.97273515 | -7.131325e-02 | 7.257486e-01 | 0.9997779456 | 0.0509435717  | 0.5728621209 | 0.92122660 | -8.991777e-02 | 0.391963207 | 0.9982883 | -2.997155e-01 | 0.0532224861 |
| 0.77869908 | -4.715240e-02 | 5.329478e-01 | 0.9997779456 | 0.5979588421  | 0.3152354447 | 0.84915316 | 3.764183e-01  | 0.438688913 | 0.9982883 | 5.371212e-02  | 0.9248881899 |
| 0.77869908 | 3.162411e-01  | 3.439251e-01 | 0.9997779456 | 0.0757953397  | 0.9283455988 | 0.98501301 | 4.553276e-01  | 0.544967135 | 0.9982883 | -4.031548e+00 | 0.0002432435 |
| 0.99066584 | -9.128810e-03 | 5.379096e-01 | 0.9997779456 | 0.1323067464  | 0.3736903265 | 0.87664366 | 6.324804e-02  | 0.535074560 | 0.9982883 | -1.459328e-01 | 0.2472165460 |
| 0.77869908 | 9.877127e-03  | 4.620488e-01 | 0.9997779456 | 0.1426618528  | 0.1875745618 | 0.83807199 | 1.391927e-01  | 0.062151659 | 0.9982883 | 1.160751e-01  | 0.2670588213 |
| 0.99066584 | -5.260426e-02 | 6.551386e-01 | 0.9997779456 | 0.1139727670  | 0.5173291378 | 0.90612020 | -8.962665e-02 | 0.372112853 | 0.9982883 | 1.652980e-01  | 0.1880403111 |
| 0.77869908 | 2.300167e-01  | 1.563280e-01 | 0.9997779456 | 0.1383882765  | 0.6335189962 | 0.93852299 | -2.121872e-01 | 0.374797695 | 0.9982883 | 3.952344e-01  | 0.2666604548 |
| 0.95284371 | -2.065118e-01 | 9.359976e-01 | 0.9997779456 | -0.1686147049 | 0.4153633441 | 0.89754931 | 1.392253e-01  | 0.294132438 | 0.9982883 | 2.181672e-02  | 0.9237259364 |
| 0.97273515 | 3.891103e-01  | 4.974975e-02 | 0.9997779456 | -0.0567126118 | 0.7943273250 | 0.95972154 | -4.234823e-02 | 0.836022130 | 0.998288  |               |              |



|             |               |              |              |               |              |            |               |              |           |                |              |
|-------------|---------------|--------------|--------------|---------------|--------------|------------|---------------|--------------|-----------|----------------|--------------|
| 0.87292023  | 1.103506e+00  | 4.441280e-02 | 0.9997779456 | 0.5860612904  | 0.5530985488 | 0.91608209 | -2.899083e-01 | 0.599905130  | 0.9982883 | -2.758079e-01  | 0.6851149486 |
| 0.95472383  | -2.684603e-01 | 9.954653e-01 | 0.9997779456 | -0.2158721626 | 0.0926917431 | 0.83807199 | -1.459507e-01 | 0.136330164  | 0.9982883 | -1.148560e-01  | 0.2079350678 |
| 0.94189574  | 3.246966e-02  | 3.327039e-01 | 0.9997779456 | 0.0018957963  | 0.9845634423 | 0.99380888 | 9.959950e-02  | 0.125952916  | 0.9982883 | -2.109453e-03  | 0.9817771477 |
| 0.77869908  | -6.807550e-01 | 8.142061e-01 | 0.9997779456 | -0.7103077370 | 0.0871876743 | 0.83807199 | 2.924159e-01  | 0.576396939  | 0.9982883 | -9.493024e-01  | 0.0321460303 |
| 0.811603165 | 1.033649e+00  | 7.608595e-02 | 0.9997779456 | -0.0334147499 | 0.9703298766 | 0.99380888 | -1.794442e-01 | 0.780105085  | 0.9982883 | 8.623673e-01   | 0.3404724318 |
| 0.79578964  | 6.722598e-03  | 4.679957e-01 | 0.9997779456 | -0.1217604056 | 0.1999443960 | 0.83807199 | -9.865114e-02 | 0.175308163  | 0.9982883 | 1.033578e-01   | 0.2574331839 |
| 0.80820047  | -6.491697e-02 | 7.432198e-01 | 0.9997779456 | -0.1971848864 | 0.1568003365 | 0.83807199 | -1.601294e-01 | 0.086331273  | 0.9982883 | 8.644454e-02   | 0.1991406498 |
| 0.99018039  | 7.484939e-02  | 4.408123e-01 | 0.9997779456 | 0.2406439042  | 0.6712201908 | 0.94130886 | 2.855644e-01  | 0.491845005  | 0.9982883 | 2.329659e-01   | 0.7211141334 |
| 0.86909435  | -9.834408e-02 | 5.775464e-01 | 0.9997779456 | -0.0462416339 | 0.9388429769 | 0.98648257 | -5.408206e-02 | 0.908945833  | 0.9982883 | 6.522795e-01   | 0.2338800301 |
| 0.77869908  | 5.691283e-02  | 2.589802e-01 | 0.9997779456 | -0.0561776489 | 0.6313278017 | 0.93852299 | -4.734841e-02 | 0.589977383  | 0.9982883 | -3.886155e-02  | 0.7868751553 |
| 0.97273515  | 1.544000e-01  | 3.688571e-01 | 0.9997779456 | 1.0574956424  | 0.3873040119 | 0.87916124 | 2.848100e-02  | 0.948326516  | 0.9984111 | -7.358562e-01  | 0.0959929542 |
| 0.87292023  | 7.121100e-02  | 3.785595e-01 | 0.9997779456 | 0.5950605299  | 0.1615955764 | 0.83807199 | 1.998202e-01  | 0.341102243  | 0.9982883 | 3.785328e-01   | 0.1609685268 |
| 0.97273515  | 2.327913e+00  | 1.685981e-01 | 0.9997779456 | 4.8342526512  | 0.3039158208 | 0.84915316 | 3.447839e+00  | 0.261446490  | 0.9982883 | -2.999333e+00  | 0.2718219638 |
| 0.97273515  | 3.326934e-01  | 2.573850e-01 | 0.9997779456 | 0.7745498411  | 0.286627453  | 0.84915316 | -1.715209e-01 | 0.769776684  | 0.9982883 | -6.452257e-04  | 0.9990009920 |
| 0.92876201  | -4.386273e-02 | 5.499140e-01 | 0.9997779456 | 0.8603432066  | 0.2087890732 | 0.83807199 | 2.541251e-01  | 0.340975929  | 0.9982883 | 2.795252e-01   | 0.5752222201 |
| 0.77869908  | -2.919675e-01 | 9.424523e-01 | 0.9997779456 | -0.3136336261 | 0.3493223278 | 0.86676800 | 3.038757e-03  | 0.986241818  | 0.9984111 | -1.218355e-01  | 0.6013277059 |
| 0.90482806  | 5.875552e-02  | 3.680811e-01 | 0.9997779456 | -0.0321512646 | 0.8214732472 | 0.95972154 | 1.142180e-02  | 0.938328458  | 0.9984111 | 1.732322e-01   | 0.2877293900 |
| 0.97100315  | -6.566192e-02 | 7.029274e-01 | 0.9997779456 | -0.1496728795 | 0.2018569712 | 0.99721989 | 5.826863e-02  | 0.522503477  | 0.9982883 | -2.040154e-02  | 0.8227128617 |
| 0.97273515  | -1.285566e-01 | 6.705362e-01 | 0.9997779456 | 0.0626746029  | 0.8563215860 | 0.96707132 | -1.682673e-01 | 0.465753440  | 0.9982883 | -5.731396e-01  | 0.0224096743 |
| 0.90802583  | -2.236311e-01 | 5.684110e-01 | 0.9997779456 | 0.6464936302  | 0.5755664281 | 0.92184217 | 7.464306e-01  | 0.454184866  | 0.9982883 | -2.599152e-01  | 0.8274689882 |
| 0.77869908  | -8.462321e-02 | 7.457405e-01 | 0.9997779456 | -0.1117349783 | 0.4712189379 | 0.90612020 | -8.227893e-02 | 0.526379382  | 0.9982883 | 1.514016e-01   | 0.2955851520 |
| 0.82862325  | 1.949417e-01  | 1.248909e-01 | 0.9997779456 | 0.0737759868  | 0.7571226736 | 0.95505354 | 1.456281e-01  | 0.255740099  | 0.9982883 | 1.789439e-01   | 0.4034565635 |
| 0.80820047  | 1.470664e-01  | 2.997005e-01 | 0.9997779456 | 0.3984045469  | 0.1763296393 | 0.83807199 | 2.006091e-01  | 0.439376427  | 0.9982883 | 4.308280e-02   | 0.9116735084 |
| 0.87292023  | -9.067975e-02 | 8.841726e-01 | 0.9997779456 | -0.1192570152 | 0.1947390440 | 0.83807199 | -4.496532e-02 | 0.482387722  | 0.9982883 | -5.335338e-02  | 0.5509547707 |
| 0.84824569  | 1.539381e-01  | 4.172555e-02 | 0.9997779456 | 0.0496679926  | 0.5567047504 | 0.91608209 | -5.584007e-02 | 0.496476017  | 0.9982883 | 6.188944e-02   | 0.6337832359 |
| 0.96804147  | 8.436086e-01  | 4.605888e-05 | 0.0272280001 | 0.2846260807  | 0.4731926780 | 0.90612020 | 2.460614e-01  | 0.238931034  | 0.9982883 | 6.278445e-01   | 0.0205171855 |
| 0.88636459  | 4.071480e-02  | 4.541787e-01 | 0.9997779456 | 0.3624943889  | 0.4419811840 | 0.90612020 | -2.764797e-01 | 0.416786339  | 0.9982883 | -5.312446e-01  | 0.4068271553 |
| 0.90482806  | -2.073090e-01 | 8.827284e-01 | 0.9997779456 | -0.2777218913 | 0.0943887787 | 0.83807199 | 1.068482e-01  | 0.503606012  | 0.9982883 | -2.474524e-01  | 0.1937535193 |
| 0.79578964  | -4.498631e-02 | 6.702177e-01 | 0.9997779456 | -0.0207110614 | 0.894952125  | 0.97246977 | -1.074547e-01 | 0.257114356  | 0.9982883 | -3.827736e-03  | 0.9730353381 |
| 0.82862325  | 5.880176e-01  | 4.105163e-02 | 0.9997779456 | -0.4191352549 | 0.1722316020 | 0.83807199 | -6.888757e-01 | 0.177088700  | 0.9982883 | -4.979464e-01  | 0.1563895946 |
| 0.93924745  | 1.919991e-01  | 2.486964e-01 | 0.9997779456 | 0.4413398153  | 0.4374753361 | 0.90612020 | 6.430340e-01  | 0.030751818  | 0.9982883 | -3.654660e-01  | 0.1516526090 |
| 0.83725376  | 1.136255e-01  | 2.190580e-01 | 0.9997779456 | 0.1174737196  | 0.5029799409 | 0.90612020 | -3.233608e-02 | 0.766358046  | 0.9982883 | -1.056722e-01  | 0.5218780409 |
| 0.97273515  | 4.390077e-01  | 4.114344e-02 | 0.9997779456 | -0.1415422381 | 0.6100141285 | 0.93042774 | -2.175339e-01 | 0.373605932  | 0.9982883 | 3.456062e-01   | 0.2223116318 |
| 0.77869908  | 1.510665e-01  | 3.816682e-01 | 0.9997779456 | 0.4377559149  | 0.4651170084 | 0.90612020 | -1.338075e-02 | 0.982087631  | 0.9984111 | -2.219769e-01  | 0.6131018610 |
| 0.77869908  | -1.575236e-01 | 9.493149e-01 | 0.9997779456 | -0.1641493664 | 0.0394817882 | 0.76504055 | -1.195511e-01 | 0.100712486  | 0.9982883 | -2.494404e-02  | 0.7820867831 |
| 0.90581107  | -2.479832e-01 | 6.526768e-01 | 0.9997779456 | 0.2821299516  | 0.7240580796 | 0.94712279 | -8.773522e-03 | 0.983013338  | 0.9984111 | 3.239598e-01   | 0.6805952200 |
| 0.97273515  | 1.002274e-01  | 4.472320e-01 | 0.9997779456 | -0.3107968780 | 0.6964251993 | 0.94482995 | 1.015423e+00  | 0.234142585  | 0.9982883 | -1.154289e+00  | 0.1509778334 |
| 0.90581107  | -1.813629e-01 | 8.026449e-01 | 0.9997779456 | 0.6438160722  | 0.0507571295 | 0.93664873 | 2.412470e-01  | 0.248817857  | 0.9982883 | 1.924855e-01   | 0.6239626300 |
| 0.99018039  | -9.757485e-01 | 8.767891e-01 | 0.9997779456 | -0.9535975750 | 0.1031721496 | 0.83807199 | -9.133756e-01 | 0.258706329  | 0.9982883 | 1.162233e-01   | 0.3537425174 |
| 0.83725376  | -1.167499e-02 | 5.459554e-01 | 0.9997779456 | 0.0450231346  | 0.8253254813 | 0.95888696 | 5137999e-01   | 0.149714081  | 0.9982883 | 7.125461e-02   | 0.6200441156 |
| 0.86909435  | 1.133999e-01  | 2.695025e-01 | 0.9997779456 | 0.3244272403  | 0.1382275744 | 0.83807199 | 2.402537e-01  | 0.178048988  | 0.9982883 | 1.766256e-01   | 0.3628002660 |
| 0.99259481  | 4.060032e-01  | 3.376122e-02 | 0.9997779456 | 0.5588347795  | 0.1740228620 | 0.83807199 | 3.337317e-01  | 0.099185738  | 0.9982883 | -2.494963e-02  | 0.9278266851 |
| 0.79972808  | -1.347646e-01 | 8.804441e-01 | 0.9997779456 | -0.1195120985 | 0.5040605857 | 0.90612020 | -1.194530e-01 | 0.457095753  | 0.9982883 | -4.589850e-02  | 0.7598130856 |
| 0.84824569  | -1.671511e-01 | 9.632111e-01 | 0.9997779456 | 0.0103622766  | 0.9221348994 | 0.98283449 | -3.350058e-03 | 0.971431718  | 0.9984111 | 1.162539e-01   | 0.1956840773 |
| 0.84600172  | -2.612064e-01 | 9.580274e-01 | 0.9997779456 | -0.4469233999 | 0.0647982235 | 0.83807199 | 1.740655e-01  | 0.298445142  | 0.9982883 | -9.252141e-02  | 0.6143022343 |
| 0.86909435  | 4.945494e-02  | 4.659681e-01 | 0.9997779456 | 0.4117252048  | 0.3873911006 | 0.87916124 | 5.004175e-01  | 0.276534542  | 0.9982883 | -4.371531e-02  | 0.9353534582 |
| 0.79972808  | -2.804571e-01 | 8.759165e-01 | 0.9997779456 | -0.1885376469 | 0.3916356430 | 0.87916124 | -1.133010e-01 | 0.640824746  | 0.9982883 | -2.475431e-01  | 0.4469693147 |
| 0.97144018  | 4.405183e-02  | 3.439227e-01 | 0.9997779456 | 0.1401909736  | 0.2242526137 | 0.83807199 | -5.446493e-02 | 0.555532963  | 0.9982883 | -5.861466e-02  | 0.4479446692 |
| 0.99066584  | -1.541043e-01 | 8.883571e-01 | 0.9997779456 | 0.1540390921  | 0.2208811361 | 0.83807199 | -8.778804e-02 | 0.515714039  | 0.9982883 | -2.677655e-01  | 0.1116118049 |
| 0.92876201  | 1.539268e-01  | 1.675510e-01 | 0.9997779456 | 0.2659930016  | 0.3047246750 | 0.84915316 | 2.641069e-01  | 0.065472340  | 0.9982883 | 9.823156e-03   | 0.9498944148 |
| 0.77869908  | 2.649304e-01  | 1.747706e-01 | 0.9997779456 | 0.0886987344  | 0.8102447356 | 0.95972154 | -1.399570e-03 | 0.996061388  | 0.9984111 | -1.3071749e-01 | 0.6901056982 |
| 0.80820047  | 2.365759e-01  | 3.504947e-01 | 0.9997779456 | -0.2035928084 | 0.6647177006 | 0.94041014 | 7.492447e-01  | 0.226185159  | 0.9982883 | 8.223387e-01   | 0.1635578190 |
| 0.97522657  | -2.152731e-01 | 9.686660e-01 | 0.9997779456 | -0.0240984421 | 0.8417775836 | 0.96338860 | -2.937708e-02 | 0.806477743  | 0.9982883 | -1.366394e-01  | 0.2094956496 |
| 0.77869908  | -1.170055e-01 | 7.945280e-01 | 0.9997779456 | 0.1856480213  | 0.3105953588 | 0.84915316 | 4.801995e-02  | 0.732943201  | 0.9982883 | 1.307922e-01   | 0.5185238573 |
| 0.77869908  | 2.098020e-01  | 7.085270e-02 | 0.9997779456 | 0.0030968793  | 0.6071664600 | 0.93042774 | -9.179598e-02 | 0.371998227  | 0.9982883 | 2.835877e-02   | 0.7739351143 |
| 0.77869908  | -5.216248e-04 | 5.009957e-01 | 0.9997779456 | -0.4060523319 | 0.0830590966 | 0.83807199 | -4.159480e-01 | 0.038287848  | 0.9982883 | -2.192883e-01  | 0.3561750044 |
| 0.97522657  | -8.191183e-02 | 8.407397e-01 | 0.9997779456 | 0.0136358856  | 0.8771963376 | 0.96947881 | 5.858143e-02  | 0.486729809  | 0.9982883 | -7.407671e-04  | 0.9952721427 |
| 0.84824569  | -1.352236e-01 | 9.029476e-01 | 0.9997779456 | -0.0533506942 | 0.6198299659 | 0.93342431 | 5.605868e-02  | 0.448371334  | 0.9982883 | 1.477238e-02   | 0.8802791326 |
| 0.81163165  | 1.069931e-01  | 3.573427e-01 | 0.9997779456 | 0.2243391842  | 0.5783593573 | 0.92506192 | -1.305686e-01 | 0.607239091  | 0.9982883 | -2.232142e-01  | 0.3471037714 |
| 0.81163165  | 2.063760e-02  | 3.714021e-01 | 0.9997779456 | 0.0457355871  | 0.5236094750 | 0.90612020 | 7.018739e-02  | 0.215549259  | 0.9982883 | 1.013492e-01   | 0.1626448575 |
| 0.97273515  | -2.262279e-01 | 9.891063e-01 | 0.9997779456 | -0.1190999420 | 0.2682494804 | 0.84915316 | 5.217344e-02  | 0.5546891375 | 0.9982883 | -2.818290e-01  | 0.0914789815 |
| 0.97273515  | -1.558710e-01 | 6.375122e-01 | 0.9997779456 | 0.3286215734  | 0.32794      |            |               |              |           |                |              |

|            |               |              |              |               |              |            |               |             |           |               |              |
|------------|---------------|--------------|--------------|---------------|--------------|------------|---------------|-------------|-----------|---------------|--------------|
| 0.80820047 | -1.241165e-01 | 8.184487e-01 | 0.9997779456 | -0.2221433590 | 0.2960181919 | 0.84915316 | 1.151007e-01  | 0.281027340 | 0.9982883 | 3.556493e-02  | 0.7648420901 |
| 0.92876201 | 9.217259e-02  | 2.833959e-01 | 0.9997779456 | -0.0278508337 | 0.8037948652 | 0.95972154 | -1.592834e-01 | 0.273241903 | 0.9982883 | -5.696705e-02 | 0.7710534729 |
| 0.97522657 | 6.335286e-02  | 3.328976e-01 | 0.9997779456 | 0.0864376673  | 0.7243977803 | 0.94712279 | 1.218710e-01  | 0.287537292 | 0.9982883 | 3.152236e-02  | 0.7682207894 |
| 0.95487380 | 7.170637e-02  | 3.468708e-01 | 0.9997779456 | 0.3503184029  | 0.1625126845 | 0.83807199 | 2.139098e-01  | 0.242059231 | 0.9982883 | -2.870243e-02 | 0.8719297458 |
| 0.95558280 | -2.643281e-01 | 9.151647e-01 | 0.9997779456 | -0.2017203835 | 0.2361379676 | 0.84413548 | -1.683322e-01 | 0.310547706 | 0.9982883 | -5.035532e-01 | 0.0023578299 |
| 0.95353311 | 2.217487e-01  | 1.746871e-02 | 0.9997779456 | 0.0070961395  | 0.9494871139 | 0.99055055 | -1.300925e-01 | 0.169660643 | 0.9982883 | 5.452342e-03  | 0.9625478656 |
| 0.87292023 | 1.047122e-01  | 1.989295e-01 | 0.9997779456 | 0.2587291382  | 0.0020706521 | 0.24475108 | 1.442060e-01  | 0.266993873 | 0.9982883 | -3.232696e-02 | 0.8061227039 |
| 0.97522657 | -2.743794e-01 | 6.761298e-01 | 0.9997779456 | 0.5964790895  | 0.4397120559 | 0.90612020 | 4.724012e-01  | 0.421725717 | 0.9982883 | -1.803021e+00 | 0.0336780742 |
| 0.89512661 | -9.037820e-02 | 6.791118e-01 | 0.9997779456 | 0.4216689498  | 0.2121959966 | 0.83807199 | 1.969316e-01  | 0.130842509 | 0.9982883 | -1.141140e-01 | 0.4934178442 |
| 0.79578964 | 8.129109e-02  | 4.353404e-01 | 0.9997779456 | 0.6891291492  | 0.2646466024 | 0.84915316 | 2.279115e-01  | 0.625262315 | 0.9982883 | -1.021916e-02 | 0.9866398021 |
| 0.95202293 | -7.174956e-02 | 7.965116e-01 | 0.9997779456 | -0.0173303381 | 0.8656661848 | 0.96707132 | 9.051295e-03  | 0.897912676 | 0.9982883 | -1.597356e-01 | 0.0189950451 |
| 0.81552863 | -2.385369e-01 | 8.363427e-01 | 0.9997779456 | -0.2178672513 | 0.3783249154 | 0.87916124 | -3.797424e-02 | 0.880176218 | 0.9982883 | -6.942784e-01 | 0.0162938816 |
| 0.98323587 | -1.875070e-01 | 7.095142e-01 | 0.9997779456 | -0.0450555407 | 0.8589414812 | 0.96707132 | -9.080622e-02 | 0.749659522 | 0.9982883 | -4.461040e-02 | 0.8519048076 |
| 0.77869908 | -7.407521e-02 | 7.198048e-01 | 0.9997779456 | -0.2626588477 | 0.0129678050 | 0.47899830 | -2.906718e-02 | 0.810953631 | 0.9982883 | -1.202770e-02 | 0.8956444005 |
| 0.83237211 | -3.840714e-01 | 9.995623e-01 | 0.9997779456 | -0.1496731879 | 0.2669319830 | 0.84915316 | -1.186081e-01 | 0.300172827 | 0.9982883 | -2.888617e-01 | 0.0738207666 |
| 0.99066584 | -4.040856e-01 | 8.327921e-01 | 0.9997779456 | 0.0111255544  | 0.9700143499 | 0.99380888 | 1.527184e-01  | 0.537953716 | 0.9982883 | -3.151691e-01 | 0.1284785969 |
| 0.77869908 | -5.408884e-02 | 7.668636e-01 | 0.9997779456 | -0.0201043587 | 0.8656964929 | 0.96707132 | 6.371215e-02  | 0.489662722 | 0.9982883 | -2.712676e-02 | 0.7920518958 |
| 0.86909435 | 6.734135e-01  | 1.706691e-04 | 0.0672436197 | 0.4087814643  | 0.1470151767 | 0.83807199 | -1.581913e-02 | 0.926068519 | 0.9986411 | 3.138459e-01  | 0.1846152003 |
| 0.99066584 | 5.169252e-02  | 3.341360e-01 | 0.9997779456 | 0.1713120921  | 0.2473213155 | 0.84413548 | 2.308987e-02  | 0.817933456 | 0.9982883 | -2.082009e-01 | 0.1020478796 |
| 0.97273515 | 9.000028e-04  | 4.974569e-01 | 0.9997779456 | 0.1885865337  | 0.4429363080 | 0.90612020 | 1.599241e-03  | 0.989973844 | 0.9986411 | -2.101062e-02 | 0.1065050284 |
| 0.77869908 | 7.626627e-02  | 4.326077e-01 | 0.9997779456 | 0.8478902211  | 0.2942004451 | 0.84915316 | -2.945004e-03 | 0.994796061 | 0.9988193 | 2.901785e-01  | 0.6574521631 |
| 0.79578964 | 2.843697e-02  | 4.629517e-01 | 0.9997779456 | -0.3982941629 | 0.2650227528 | 0.84915316 | -1.630146e-01 | 0.562503060 | 0.9982883 | 8.820259e-03  | 0.9827055546 |
| 0.79213004 | -8.441899e-02 | 8.259926e-01 | 0.9997779456 | 0.0367370411  | 0.6907116768 | 0.94482995 | -3.558192e-02 | 0.623707875 | 0.9982883 | 1.278391e-01  | 0.2829251819 |
| 0.94189574 | 1.688295e-01  | 5.304014e-02 | 0.9997779456 | -0.0107457915 | 0.9329081420 | 0.98590149 | 7.581621e-03  | 0.922576594 | 0.9982883 | -8.720096e-02 | 0.5044280445 |
| 0.82138617 | 4.325041e-02  | 3.752449e-01 | 0.9997779456 | -0.1298401566 | 0.2712173698 | 0.84915316 | -8.136588e-02 | 0.577825307 | 0.9982883 | -7.757626e-02 | 0.6113105017 |
| 0.90581107 | -3.808283e-02 | 6.096672e-01 | 0.9997779456 | -0.2519862359 | 0.4190887058 | 0.89856301 | -3.059775e-01 | 0.027551418 | 0.9982883 | 2.348271e-01  | 0.1963459153 |
| 0.86909435 | 5.087168e-02  | 4.179811e-01 | 0.9997779456 | -0.1623824205 | 0.6574572928 | 0.93854411 | -7.177891e-02 | 0.775929271 | 0.9982883 | -4.432607e-01 | 0.1460981084 |
| 0.77869908 | 3.262849e-01  | 1.235795e-01 | 0.9997779456 | 0.0504071832  | 0.8148549135 | 0.95972154 | -2.606655e-01 | 0.167869926 | 0.9982883 | 2.740498e-01  | 0.2375492034 |
| 0.97273515 | 6.073565e-02  | 3.377841e-01 | 0.9997779456 | -0.2866335364 | 0.1241587056 | 0.83807199 | 4.218703e-02  | 0.749710568 | 0.9982883 | -1.066113e-01 | 0.6079927174 |
| 0.97273515 | 9.782790e-02  | 2.266213e-01 | 0.9997779456 | 0.0886203968  | 0.4872565529 | 0.90612020 | 1.828728e-01  | 0.113921031 | 0.9982883 | 7.930979e-02  | 0.5436926097 |
| 0.97050390 | -5.861658e-02 | 6.150014e-01 | 0.9997779456 | -0.0876946264 | 0.7687952871 | 0.95050354 | 1.533273e-01  | 0.331593982 | 0.9982883 | 9.879482e-03  | 0.9673837034 |
| 0.77869908 | 3.148192e+00  | 6.186185e-07 | 0.0007312071 | 0.1537928310  | 0.7699063333 | 0.95050354 | 3.321325e-01  | 0.440924385 | 0.9982883 | 6.257453e-01  | 0.1874504831 |
| 0.90581107 | -3.140021e-01 | 8.538312e-01 | 0.9997779456 | -0.5077756305 | 0.2413447454 | 0.84413548 | -3.182113e-01 | 0.175642793 | 0.9982883 | -1.915024e-02 | 0.9601994793 |
| 0.86936459 | 1.444759e-02  | 4.777923e-01 | 0.9997779456 | -0.0480574963 | 0.8734960444 | 0.96947881 | -4.125647e-02 | 0.858331093 | 0.9982883 | 1.594241e-01  | 0.6726562032 |
| 0.95472383 | -1.572701e-01 | 8.959066e-01 | 0.9997779456 | -0.1567072417 | 0.2838516473 | 0.84915316 | 9.895628e-02  | 0.301373713 | 0.9982883 | 1.324416e-01  | 0.3624086169 |
| 0.77869908 | 1.593094e-02  | 4.305038e-01 | 0.9997779456 | -0.0209453232 | 0.8161007374 | 0.95972154 | 3.927091e-02  | 0.661685649 | 0.9982883 | -3.332786e-02 | 0.8227513634 |
| 0.90802583 | 2.128323e-01  | 4.547286e-02 | 0.9997779456 | 0.1830280992  | 0.3901357088 | 0.87916124 | 3.701205e-02  | 0.717560082 | 0.9982883 | 3.047939e-01  | 0.0020756404 |
| 0.81552863 | 4.983025e-02  | 2.982540e-01 | 0.9997779456 | 0.0787204307  | 0.4077208400 | 0.89501894 | 1.107538e-01  | 0.158782003 | 0.9982883 | -2.371631e-03 | 0.9818959663 |
| 0.84315681 | 6.064246e-02  | 1.819700e-01 | 0.9997779456 | 0.1570748849  | 0.0060528836 | 0.40915301 | 3.522932e-02  | 0.546816660 | 0.9982883 | -9.337731e-02 | 0.1354401574 |
| 0.83725376 | 1.493878e-01  | 2.880106e-01 | 0.9997779456 | 0.6600703713  | 0.1285518537 | 0.83807199 | 3.169812e-01  | 0.173972734 | 0.9982883 | 5.528312e-01  | 0.1142842054 |
| 0.89369078 | -6.195493e-02 | 7.996615e-01 | 0.9997779456 | -0.1422410578 | 0.0611271150 | 0.83807199 | 1.194558e-02  | 0.867015596 | 0.9982883 | -1.263739e-01 | 0.2346890059 |
| 0.82862325 | -1.474071e-01 | 9.398455e-01 | 0.9997779456 | 0.0241142765  | 0.7991448157 | 0.95972154 | 1.222047e-01  | 0.147251560 | 0.9982883 | 3.080312e-02  | 0.7553418448 |
| 0.89369078 | -2.614813e-01 | 9.932837e-01 | 0.9997779456 | -0.0531214784 | 0.5886303822 | 0.92532140 | 1.340011e-01  | 0.304934187 | 0.9982883 | 1.864385e-01  | 0.0786884709 |
| 0.80820047 | -2.559370e-01 | 9.860757e-01 | 0.9997779456 | -0.1244431035 | 0.2902750065 | 0.84915316 | -1.280162e-01 | 0.282048528 | 0.9982883 | -2.362126e-01 | 0.2137607165 |
| 0.77869908 | 2.446674e-01  | 1.155479e-01 | 0.9997779456 | 0.4051287241  | 0.1458324123 | 0.83807199 | 2.496313e-01  | 0.209389931 | 0.9982883 | 2.981379e-01  | 0.1910483691 |
| 0.98420295 | -1.847258e-01 | 8.395686e-01 | 0.9997779456 | -0.1375001867 | 0.4807471484 | 0.90612020 | -1.037869e-01 | 0.525893153 | 0.9982883 | -9.991718e-02 | 0.6687598948 |
| 0.81163165 | -1.117751e-01 | 8.317517e-01 | 0.9997779456 | -0.0726724435 | 0.5018882973 | 0.90612020 | 1.602051e-02  | 0.867633733 | 0.9982883 | -2.026325e-02 | 0.8489371793 |
| 0.86955753 | 4.412138e-02  | 2.428422e-01 | 0.9997779456 | 0.1030530650  | 0.2016291988 | 0.83807199 | 3.790994e-02  | 0.530399980 | 0.9982883 | -5.134733e-02 | 0.6380843091 |
| 0.98299735 | 8.393150e-02  | 2.475155e-01 | 0.9997779456 | 0.4259505867  | 0.0014825729 | 0.19471124 | 9.607577e-02  | 0.500720326 | 0.9982883 | -6.221214e-02 | 0.6619732060 |
| 0.95472383 | -5.960743e-02 | 7.643514e-01 | 0.9997779456 | 0.0631593385  | 0.4601230160 | 0.90612020 | 5.354124e-02  | 0.438328195 | 0.9982883 | -8.997753e-03 | 0.8879865186 |
| 0.92041982 | 2.744103e-02  | 3.512379e-01 | 0.9997779456 | -0.0308346243 | 0.7039112562 | 0.94482995 | -2.763939e-02 | 0.719251597 | 0.9982883 | -5.258490e-02 | 0.6241606431 |
| 0.97273515 | -2.326015e-01 | 8.123433e-01 | 0.9997779456 | -0.3323210985 | 0.0943818663 | 0.83807199 | -3.364894e-01 | 0.121465373 | 0.9982883 | -5.421189e-01 | 0.0123857877 |
| 0.87292023 | -1.003760e-01 | 7.754704e-01 | 0.9997779456 | -0.1809845008 | 0.2001378584 | 0.83807199 | -1.474164e-01 | 0.311099972 | 0.9982883 | -1.716153e-01 | 0.2695970425 |
| 0.89656266 | -1.982093e-01 | 9.150910e-01 | 0.9997779456 | -0.1668400678 | 0.2141202783 | 0.83807199 | -1.552793e-01 | 0.322930876 | 0.9982883 | -1.240384e-01 | 0.4950347417 |
| 0.81552863 | -5.274942e-01 | 9.817887e-01 | 0.9997779456 | -0.1708873031 | 0.5945331982 | 0.92532140 | 1.695949e-01  | 0.435229335 | 0.9982883 | -3.241137e-01 | 0.3525736223 |
| 0.77869908 | 1.481740e-01  | 7.880491e-02 | 0.9997779456 | 0.2303746561  | 0.1152526469 | 0.83807199 | -1.078765e-03 | 0.990192395 | 0.9986411 | 2.641997e-01  | 0.0302419252 |
| 0.97185522 | 5.798294e-01  | 3.401758e-02 | 0.9997779456 | 0.2350115317  | 0.6439911386 | 0.93854411 | 2.441713e-01  | 0.416515569 | 0.9982883 | -4.291533e-01 | 0.3798209003 |
| 0.79578964 | 2.290435e-01  | 6.819882e-02 | 0.9997779456 | -0.0324808364 | 0.8946121931 | 0.97246977 | 8.283355e-03  | 0.954610023 | 0.9986411 | 2.782474e-01  | 0.2492424147 |
| 0.77869908 | 2.241258e-01  | 9.167129e-02 | 0.9997779456 | -0.0818704870 | 0.7004010685 | 0.94482995 | -7.265511e-02 | 0.561419958 | 0.9982883 | 1.288323e-01  | 0.3991273453 |
| 0.98042753 | 1.542913e-02  | 4.456196e-01 | 0.9997779456 | 0.1821203698  | 0.3021480910 | 0.84915316 | 1.994512e-01  | 0.068352555 | 0.9982883 | 2.312791e-01  | 0.0805454859 |
| 0.82862325 | -4.514748e-02 | 7.295478e-01 | 0.9997779456 | -0.0789293666 | 0.5228285708 | 0.90612020 | 9.587300e-03  | 0.903617299 | 0.9982883 | 2.996221e-02  | 0.7677875546 |
| 0.77869908 | -8.252228e-02 | 7.761686e-01 | 0.9997779456 | -0.0228189531 | 0.8257216364 | 0.95988696 | -8.826702e-02 | 0.326578945 | 0.998     |               |              |



| Activesmoking                                 | Allergy       | Allergy               | Allergy                                       | P<CI           | P<CI                  | P<CI                                          |
|-----------------------------------------------|---------------|-----------------------|-----------------------------------------------|----------------|-----------------------|-----------------------------------------------|
| Adj. p-val. (2-sided test, Benjamini-H. cor.) | AVG Log.Ratio | p-val. (2-sided test) | Adj. p-val. (2-sided test, Benjamini-H. cor.) | AVG Log.Ratio  | p-val. (2-sided test) | Adj. p-val. (2-sided test, Benjamini-H. cor.) |
| 0.9923046                                     | -0.0384131929 | 9.005915e-01          | 0.9969722                                     | 0.0928284216   | 8.020690e-01          | 9.207928e-01                                  |
| 0.8497626                                     | 0.1394959691  | 5.699765e-01          | 0.9641086                                     | -0.4063845427  | 1.273771e-01          | 4.047304e-01                                  |
| 0.9949051                                     | -0.8090177606 | 5.120539e-02          | 0.7921508                                     | -0.0428904548  | 9.274500e-01          | 9.835175e-01                                  |
| 0.9949051                                     | -0.2348907008 | 6.354114e-01          | 0.9689755                                     | -0.3102466520  | 4.342856e-01          | 7.199517e-01                                  |
| 0.8394240                                     | 0.2815026205  | 6.091330e-01          | 0.9641086                                     | -1.1300490874  | 3.096886e-02          | 1.848747e-01                                  |
| 0.9656591                                     | 0.2433755404  | 6.733245e-01          | 0.9717521                                     | -0.81171161646 | 3.548998e-02          | 2.026358e-01                                  |
| 0.9949051                                     | -0.7716564809 | 1.902003e-01          | 0.8526631                                     | -0.7164419946  | 2.221028e-01          | 5.328026e-01                                  |
| 0.8532963                                     | -0.1813086873 | 7.480137e-01          | 0.9823061                                     | -0.7485862790  | 5.718821e-02          | 2.714717e-01                                  |
| 0.9949051                                     | -0.5988013736 | 8.234041e-03          | 0.3705021                                     | -0.1201309834  | 6.594688e-01          | 8.563248e-01                                  |
| 0.4126320                                     | -0.4488913667 | 7.697931e-02          | 0.7921508                                     | -0.0927269384  | 7.423648e-01          | 8.836608e-01                                  |
| 0.9949051                                     | 0.1146802248  | 5.784051e-01          | 0.9641086                                     | -0.1641645659  | 5.332831e-01          | 7.882615e-01                                  |
| 0.9949051                                     | -0.0714178330 | 7.211404e-01          | 0.9733364                                     | 0.2135597897   | 4.083493e-01          | 6.954883e-01                                  |
| 0.9949051                                     | -0.4623196398 | 1.034397e-02          | 0.3705021                                     | -0.1424364744  | 3.823842e-01          | 6.715871e-01                                  |
| 0.2034892                                     | 0.0114862517  | 9.619074e-01          | 0.9969722                                     | -0.0388144645  | 8.484851e-01          | 9.481630e-01                                  |
| 0.9949051                                     | -0.9103468230 | 7.282280e-02          | 0.7921508                                     | -0.5555174080  | 3.019218e-01          | 6.206462e-01                                  |
| 0.9949051                                     | 0.6917953994  | 4.375791e-01          | 0.9482489                                     | -0.6808525475  | 2.367177e-01          | 5.464911e-01                                  |
| 0.9210048                                     | 0.2415005092  | 5.509507e-01          | 0.9641086                                     | 0.0308265068   | 9.444174e-01          | 9.835175e-01                                  |
| 0.9210048                                     | -0.5093535574 | 7.471011e-02          | 0.7921508                                     | -0.2434086924  | 2.791358e-01          | 5.902299e-01                                  |
| 0.7475613                                     | 0.5243558366  | 5.250620e-01          | 0.9641086                                     | -0.6615656814  | 6.245319e-02          | 2.813791e-01                                  |
| 0.8497626                                     | -0.7022248870 | 1.655841e-02          | 0.4760109                                     | -0.0644959210  | 8.894322e-01          | 9.646093e-01                                  |
| 0.7251512                                     | -0.0655407058 | 8.731800e-01          | 0.9969722                                     | 0.1314013978   | 6.787465e-01          | 8.656565e-01                                  |
| 0.8730639                                     | -0.0355759383 | 9.087042e-01          | 0.9969722                                     | -0.0803221310  | 7.162609e-01          | 8.762099e-01                                  |
| 0.9949051                                     | -0.4258250814 | 2.975133e-01          | 0.9286466                                     | -0.6362527427  | 6.686284e-02          | 2.894932e-01                                  |
| 0.9949051                                     | -0.1635738477 | 4.692179e-01          | 0.9641086                                     | 0.2826894155   | 2.336882e-01          | 5.448022e-01                                  |
| 0.8194410                                     | -0.5824920325 | 4.396554e-01          | 0.9482489                                     | -0.8509041136  | 2.784020e-01          | 5.897332e-01                                  |
| 0.9949051                                     | -0.3529020412 | 1.440213e-01          | 0.8166268                                     | -0.1901990237  | 4.886166e-01          | 7.621198e-01                                  |
| 0.9949051                                     | -1.1999017887 | 3.455469e-04          | 0.0782857                                     | -0.2732188544  | 5.525670e-01          | 7.993060e-01                                  |
| 0.8194410                                     | -0.3468905991 | 3.183402e-01          | 0.9300968                                     | -0.3209458982  | 4.728981e-01          | 7.506714e-01                                  |
| 0.9949051                                     | -0.4420311327 | 1.577704e-01          | 0.8386867                                     | 0.0222177089   | 9.643284e-01          | 9.911619e-01                                  |
| 0.9949051                                     | -0.0982835064 | 7.237403e-01          | 0.9733364                                     | -0.1054070574  | 7.039557e-01          | 8.782099e-01                                  |
| 0.9949051                                     | -0.2048677567 | 3.992543e-01          | 0.9430561                                     | -0.1898711418  | 3.441145e-01          | 6.539822e-01                                  |
| 0.9949051                                     | -0.2751653741 | 3.054104e-01          | 0.9286466                                     | 0.5781147627   | 3.902754e-01          | 6.774824e-01                                  |
| 0.8394240                                     | 0.1260704721  | 7.039967e-01          | 0.9733364                                     | -0.4508814628  | 8.582686e-02          | 3.339128e-01                                  |
| 0.9949051                                     | -1.0141029166 | 1.366314e-01          | 0.8166268                                     | -0.6083665545  | 3.174639e-01          | 6.316783e-01                                  |
| 0.8022770                                     | -0.3996320828 | 1.498916e-01          | 0.8317927                                     | -0.2697565188  | 3.289520e-01          | 6.412262e-01                                  |
| 0.9148164                                     | 0.3585356661  | 2.809931e-02          | 0.6133169                                     | -0.1701048738  | 4.987559e-01          | 7.643323e-01                                  |
| 0.9210048                                     | -0.0123130680 | 9.611977e-01          | 0.9969722                                     | -0.5933536306  | 6.078064e-02          | 2.794948e-01                                  |
| 0.8194410                                     | -0.3718597560 | 9.904005e-02          | 0.8015257                                     | -0.3243317723  | 1.137968e-01          | 3.920865e-01                                  |
| 0.9682638                                     | -0.5456009828 | 2.151874e-02          | 0.5208990                                     | -0.5282315593  | 7.458743e-02          | 3.159940e-01                                  |
| 0.9949051                                     | 0.0170779629  | 9.693684e-01          | 0.9969722                                     | -0.3079180617  | 4.992085e-01          | 7.643323e-01                                  |
| 0.2019302                                     | 0.0008755298  | 9.974102e-01          | 0.9997294                                     | -0.2281887775  | 4.748882e-01          | 7.506714e-01                                  |
| 0.8612982                                     | -0.2239215483 | 3.979878e-01          | 0.9430561                                     | 0.0918172310   | 7.91874e-01           | 9.053594e-01                                  |
| 0.9949051                                     | -0.2954987763 | 2.063155e-01          | 0.8617136                                     | -0.1475882491  | 4.975011e-01          | 7.643323e-01                                  |
| 0.9949051                                     | -0.3335481998 | 1.635457e-01          | 0.8441531                                     | -0.3123238929  | 2.298426e-01          | 5.401073e-01                                  |
| 0.9275791                                     | -0.0295943500 | 9.064985e-01          | 0.9969722                                     | -0.1025812035  | 6.638404e-01          | 8.572639e-01                                  |
| 0.9949051                                     | -1.3597453829 | 3.139268e-04          | 0.0782857                                     | 0.1739399619   | 6.550307e-01          | 8.556317e-01                                  |
| 0.9949051                                     | 0.0042199062  | 9.732796e-01          | 0.9969722                                     | -0.1417867064  | 3.890019e-01          | 6.774824e-01                                  |
| 0.9949051                                     | -0.2228666204 | 2.202721e-01          | 0.8800012                                     | 0.1585571399   | 5.811031e-01          | 8.225914e-01                                  |
| 0.8394240                                     | -0.5534007967 | 1.460414e-01          | 0.8181086                                     | 0.8116520412   | 4.070229e-01          | 6.952547e-01                                  |
| 0.8194410                                     | 0.5404552594  | 2.092852e-01          | 0.8699563                                     | -0.4897969725  | 1.982700e-01          | 4.999890e-01                                  |
| 0.9210048                                     | -0.3368928723 | 2.568330e-02          | 0.5383011                                     | -0.0740022618  | 6.883582e-01          | 8.702025e-01                                  |
| 0.9949051                                     | -0.1041991282 | 3.371202e-01          | 0.9366787                                     | 0.0094188359   | 4.910395e-01          | 9.835175e-01                                  |
| 0.8497626                                     | -0.5871145393 | 3.878526e-02          | 0.6813116                                     | -0.3341901616  | 3.569106e-01          | 6.629639e-01                                  |
| 0.9949051                                     | 0.6354113305  | 4.106374e-01          | 0.9430561                                     | 2.7104065622   | 3.928840e-04          | 6.537599e-03                                  |
| 0.9949051                                     | 0.0666916110  | 5.262206e-01          | 0.9641086                                     | -0.2174575706  | 1.252452e-01          | 4.011918e-01                                  |
| 0.9949051                                     | 0.0040446452  | 8.912637e-01          | 0.9969722                                     | -0.2748699044  | 1.033011e-01          | 3.707823e-01                                  |
| 0.9949051                                     | 0.0229370348  | 9.284662e-01          | 0.9969722                                     | 1.1367035357   | 1.182049e-03          | 1.440394e-02                                  |
| 0.8264615                                     | 0.4578842547  | 3.096130e-01          | 0.9288274                                     | -0.3684211142  | 1.195076e-01          | 3.995752e-01                                  |
| 0.9949051                                     | -0.1367291015 | 1.870961e-01          | 0.8526631                                     | -0.1552983427  | 8.781231e-02          | 3.369940e-01                                  |
| 0.2019302                                     | -0.0989501873 | 4.650261e-01          | 0.9641086                                     | -0.1916625969  | 1.828061e-01          | 4.856568e-01                                  |
| 0.8540650                                     | -0.0210224788 | 8.975701e-01          | 0.9969722                                     | 0.0861330610   | 6.129270e-01          | 8.394899e-01                                  |
| 0.9949051                                     | 0.0894716246  | 3.584951e-01          | 0.9430561                                     | -0.0792406256  | 2.367203e-01          | 5.464911e-01                                  |
| 0.9949051                                     | -0.0153634857 | 9.373863e-01          | 0.9969722                                     | -0.0181652816  | 9.042711e-01          | 9.710339e-01                                  |
| 0.5172057                                     | -0.0185604990 | 9.194666e-01          | 0.9969722                                     | 0.0545224666   | 7.093463e-01          | 8.762099e-01                                  |
| 0.2019302                                     | -0.0765815337 | 5.294235e-01          | 0.9641086                                     | -0.2023238754  | 3.078472e-02          | 1.847083e-01                                  |
| 0.8791060                                     | -0.0470667007 | 6.959512e-01          | 0.9733364                                     | -0.1836422397  | 3.073148e-02          | 1.847083e-01                                  |
| 0.9949051                                     | -0.2211528378 | 6.272780e-01          | 0.9689755                                     | 0.1989387822   | 6.555443e-01          | 8.556317e-01                                  |
| 0.9949051                                     | -1.1269672237 | 2.699760e-01          | 0.9106469                                     | 0.8570605889   | 5.321494e-01          | 7.882615e-01                                  |
| 0.8497626                                     | 0.9180332772  | 1.964474e-01          | 0.8526631                                     | 0.4808493156   | 2.666159e-01          | 5.814391e-01                                  |
| 0.9949051                                     | -0.4079797313 | 3.872185e-03          | 0.2875687                                     | -0.1253413245  | 4.124492e-01          | 6.984455e-01                                  |
| 0.9715057                                     | 0.3264972326  | 1.777733e-01          | 0.8526631                                     | -0.4150310213  | 8.152986e-02          | 3.294921e-01                                  |
| 0.9949051                                     | -0.0396432286 | 9.648196e-01          | 0.9969722                                     | 4.2258131673   | 4.645747e-04          | 7.131524e-03                                  |
| 0.9949051                                     | -0.2111920438 | 5.475821e-01          | 0.9641086                                     | -0.9546605263  | 1.668654e-02          | 1.188040e-01                                  |
| 0.9949051                                     | -0.1801084018 | 7.777591e-02          | 0.7921508                                     | -0.0726769562  | 4.755940e-01          | 7.506714e-01                                  |
| 0.9949051                                     | -0.2485333226 | 5.830121e-01          | 0.9641086                                     | -0.1984665470  | 6.482469e-01          | 8.523113e-01                                  |
| 0.9949051                                     | -0.1283642738 | 1.124598e-01          | 0.8166268                                     | -0.0860517402  | 3.165690e-01          | 6.316783e-01                                  |
| 0.9949051                                     | 0.0088827740  | 6.597313e-01          | 0.9689755                                     | 0.1832976633   | 3.025248e-01          | 6.208061e-01                                  |
| 0.9949051                                     | -0.3006975349 | 6.530147e-03          | 0.3216097                                     | -0.0678469099  | 6.334365e-01          | 8.479297e-01                                  |
| 0.9210048                                     | -0.0103249030 | 9.590722e-01          | 0.9969722                                     | -0.1952357445  | 2.879400e-01          | 6.045220e-01                                  |
| 0.8264615                                     | 0.1328474027  | 5.722439e-01          | 0.9641086                                     | 0.0259281201   | 8.286460e-01          | 9.372819e-01                                  |
| 0.8329325                                     | -0.0996459332 | 4.393129e-01          | 0.9482489                                     | -0.1161674086  | 1.507444e-01          | 4.410394e-01                                  |
| 0.8540650                                     | -0.0162874636 | 8.684248e-01          | 0.9969722                                     | -0.1020077932  | 2.131396e-01          | 5.215962e-01                                  |
| 0.9275791                                     | -0.0107091728 | 9.032781e-01          | 0.9969722                                     | -0.2061810699  | 5.561772e-02          | 2.661544e-01                                  |
| 0.9949051                                     | 0.1628318670  | 1.862940e-01          | 0.8467562                                     | -0.2023073634  | 5.908739e-02          | 2.771480e-01                                  |
| 0.9998859                                     | 0.0861176218  | 4.152592e-01          | 0.9430561                                     | -0.2175341330  | 6.168619e-03          | 5.441274e-02                                  |
| 0.9949051                                     | 0.0229789152  | 9.779757e-01          | 0.9969722                                     | 2.8851022132   | 1.636141e-03          | 1.834638e-02                                  |
| 0.9949051                                     | -0.5422254266 | 1.060212e-04          | 0.0626585                                     | 0.0336889971   | 8.736820e-01          | 9.553119e-01                                  |
| 0.9949051                                     | -0.0858104188 | 8.194457e-01          | 0.9957784                                     | 1.9409901437   | 3.057407e-04          | 5.646648e-03                                  |
| 0.9949051                                     | 0.2832449394  | 6.766091e-01          | 0.9717521                                     | 2.4977297885   | 4.037273e-04          | 6.625290e-03                                  |
| 0.9949051                                     | 0.0323041968  | 9.382643e-01          | 0.9969722                                     | 1.5444303387   | 3.540918e-04          | 6.154948e-03                                  |
| 0.9949051                                     | -0.2192403355 | 1.596719e-01          | 0.8388907                                     | 0.1634884074   | 2.424168e-01          | 5.531595e-01                                  |
| 0.9949051                                     | 0.0960528469  | 4.538516e-01          | 0.9579510                                     | -0.3478995251  | 7.592442e-04          | 1.008345e-02                                  |
| 0.8394240                                     | -0.2910741926 | 6.932220e-02          | 0.7921508                                     | -0.1751938070  | 2.380653e-01          | 5.474575e-01                                  |
| 0.9148164                                     | -0.1471202801 | 1.834579e-01          | 0.8526631                                     | -0.0281115565  | 8.104941e-01          | 9.247143e-01                                  |
| 0.9923046                                     | -0.0727146480 | 3.790825e-01          | 0.9430561                                     | -0.0459885197  | 6.264615e-01          | 8.433108e-01                                  |
| 0.9109219                                     | -0.2199884325 | 6.572164e-01          | 0.9689755                                     | 0.4299490276   | 2.726150e-01          | 5.858743e-01                                  |
| 0.8653339                                     | -0.0340661562 | 7.190266e-01          | 0.9733364                                     | -0.0675208993  | 3.747039e-01          | 6.700454e-01                                  |
| 0.6925121                                     | -0.1771859928 | 6.881394e-02          | 0.7921508                                     | -0.1144740182  | 2.954840e-01          | 6.138173e-01                                  |
| 0.8540650                                     | -0.1035747726 | 8.995534e-02          | 0.7921508                                     | -0.0938354349  | 1.647790e-01          | 4.666833e-01                                  |
| 0.9949051                                     | 0.4281510072  | 5.267260e-01          | 0.9641086                                     | -0.4320790131  | 1.768132e-01          | 4.802300e-01                                  |
| 0.2034892                                     | -0.0728322880 | 4.848915e-01          | 0.9641086                                     | -0.1665855930  | 1.038316e-01          | 3.707823e-01                                  |
| 0.8394240                                     | -0.2488023865 | 7.156431e-02          | 0.7921508                                     | 0.0314899063   | 7.923673e-01          | 9.155212e-01                                  |
| 0.9210048                                     | -0.0206471607 | 9.407901e-01          | 0.9969722                                     | 0.1979997903   | 5.336953e-01          | 8.247616e-01                                  |
| 0.8394240                                     | -0.2132628988 | 5.488312e-01          | 0.9641086                                     | -0.4046176860  | 9.869967e-02          | 3.627027e-01                                  |
| 0.8477725                                     | 0.06          |                       |                                               |                |                       |                                               |

|           |               |              |           |               |              |              |
|-----------|---------------|--------------|-----------|---------------|--------------|--------------|
| 0.8210171 | -0.3516465080 | 5.767453e-01 | 0.9641086 | 1.6087761796  | 2.767826e-01 | 5.897332e-01 |
| 0.8805172 | -0.4459560167 | 1.574044e-02 | 0.4760109 | -0.0962642704 | 5.464724e-01 | 7.942706e-01 |
| 0.9949051 | 0.0510162782  | 9.193783e-01 | 0.9969722 | -0.3700921824 | 4.595197e-01 | 7.420113e-01 |
| 0.9949051 | -0.0430714128 | 9.258165e-01 | 0.9969722 | 1.9694488423  | 4.565904e-05 | 1.686531e-03 |
| 0.9949051 | 0.3106335053  | 7.943788e-01 | 0.9957784 | -2.6192625747 | 4.099895e-02 | 2.233215e-01 |
| 0.9961675 | -0.1488634710 | 1.367642e-01 | 0.8166268 | -0.0104498763 | 9.319049e-01 | 9.835175e-01 |
| 0.8394240 | -0.1193548064 | 3.256547e-01 | 0.9364851 | 0.0022096485  | 9.863212e-01 | 9.950155e-01 |
| 0.9949051 | 0.0047943347  | 9.784033e-01 | 0.9969722 | -0.1464366139 | 4.212185e-01 | 7.092312e-01 |
| 0.9949051 | -0.1204193040 | 5.098270e-01 | 0.9641086 | -0.1799138617 | 3.227101e-01 | 6.359740e-01 |
| 0.9949051 | -0.3614239883 | 1.718722e-01 | 0.8467562 | -0.0318475303 | 9.052332e-01 | 9.710339e-01 |
| 0.9949051 | 0.3156093377  | 4.153149e-01 | 0.9430561 | 1.3782416160  | 2.202358e-03 | 2.303706e-02 |
| 0.9949051 | 0.1879128682  | 7.005420e-01 | 0.9733364 | 2.4301113365  | 3.746681e-04 | 6.418228e-03 |
| 0.9949051 | -0.0729164062 | 4.385100e-01 | 0.9482489 | -0.0220762974 | 8.661113e-01 | 9.515996e-01 |
| 0.9949051 | 0.0024489177  | 9.814890e-01 | 0.9969722 | -0.1275462088 | 2.750966e-01 | 5.881219e-01 |
| 0.9949051 | -0.0421807757 | 7.795931e-01 | 0.9932650 | -0.3951628125 | 7.905818e-03 | 6.722790e-02 |
| 0.9949051 | 0.0476507989  | 8.256536e-01 | 0.9964090 | -0.1110991451 | 6.970188e-01 | 8.762099e-01 |
| 0.9949051 | -0.1745052469 | 1.930189e-01 | 0.8526631 | -0.2269762969 | 1.296856e-01 | 4.087689e-01 |
| 0.9949051 | 0.0320230164  | 7.504419e-01 | 0.9823061 | 0.0300889083  | 6.988954e-01 | 8.782099e-01 |
| 0.9949051 | -0.0113461445 | 9.486583e-01 | 0.9969722 | -0.0038887179 | 9.822698e-01 | 9.950155e-01 |
| 0.9949051 | 0.0365141921  | 8.886158e-01 | 0.9969722 | 0.9926491750  | 4.620883e-04 | 7.131524e-03 |
| 0.8264615 | -0.1290226883 | 2.110439e-01 | 0.8699563 | -0.0839356037 | 4.754919e-01 | 7.506714e-01 |
| 0.9949051 | 0.6380675532  | 5.040001e-01 | 0.9641086 | 5.3653555399  | 1.056252e-06 | 2.496980e-04 |
| 0.9949051 | -0.0108294120 | 9.058574e-01 | 0.9969722 | -0.1331853868 | 1.765036e-01 | 4.802300e-01 |
| 0.9949051 | -0.0060855478 | 9.719637e-01 | 0.9969722 | 0.1346585456  | 3.614711e-01 | 6.629639e-01 |
| 0.9949051 | -0.0586468072 | 4.829364e-01 | 0.9641086 | -0.0355808611 | 7.887334e-01 | 9.122142e-01 |
| 0.9949051 | -0.1645475294 | 9.461341e-02 | 0.7921508 | -0.0379340105 | 7.055155e-01 | 8.762099e-01 |
| 0.8194410 | -0.1966575230 | 1.118337e-02 | 0.3776783 | -0.0732829051 | 3.228295e-01 | 6.359740e-01 |
| 0.8449829 | -0.0156804392 | 8.320268e-01 | 0.9964090 | 0.0090910818  | 8.597024e-01 | 9.515996e-01 |
| 0.9696873 | -0.1325443697 | 3.675193e-01 | 0.9430561 | -0.0488164722 | 7.514101e-01 | 8.876755e-01 |
| 0.8103326 | 0.1786817645  | 5.828668e-02 | 0.7921508 | -0.2038435199 | 1.669834e-01 | 4.676259e-01 |
| 0.8194410 | 0.1728216093  | 1.717585e-01 | 0.8467562 | -0.0736490001 | 5.684697e-01 | 8.127545e-01 |
| 0.9949051 | 0.1118468871  | 7.044427e-01 | 0.9733364 | -0.2354027487 | 2.978875e-01 | 6.166427e-01 |
| 0.9949051 | 0.3739023458  | 2.410562e-01 | 0.8975264 | 0.0247476738  | 9.332694e-01 | 9.835175e-01 |
| 0.9923046 | -0.1474568439 | 3.292335e-01 | 0.9366787 | -0.108686053  | 1.213293e-01 | 3.995752e-01 |
| 0.9949051 | 0.1438361412  | 2.762992e-01 | 0.9110414 | -0.4467483873 | 2.078530e-02 | 1.409284e-01 |
| 0.8194410 | 1.0421160292  | 2.847210e-01 | 0.9245610 | -0.3399724154 | 3.782017e-01 | 6.707992e-01 |
| 0.9949051 | 0.0284998615  | 7.886937e-01 | 0.9957784 | -0.0580947180 | 6.290773e-01 | 8.433108e-01 |
| 0.8194410 | -0.0031249886 | 9.780749e-01 | 0.9969722 | -0.0535121832 | 6.976653e-01 | 8.762099e-01 |
| 0.8540650 | 0.0354133363  | 8.700733e-01 | 0.9932650 | 0.0686615971  | 5.704384e-01 | 8.131842e-01 |
| 0.9923046 | -0.1683011521 | 1.001920e-01 | 0.8015257 | -0.1715609305 | 6.579759e-02 | 2.881189e-01 |
| 0.9949051 | -0.0955092362 | 3.879496e-01 | 0.9430561 | -0.0573476120 | 5.907979e-01 | 8.264179e-01 |
| 0.9949051 | -0.0991354380 | 3.585338e-01 | 0.9430561 | -0.2236426157 | 4.561489e-02 | 2.354314e-01 |
| 0.9210048 | -0.0113837816 | 9.176491e-01 | 0.9969722 | -0.0590531407 | 4.561558e-01 | 7.385974e-01 |
| 0.9949051 | 0.1855440842  | 1.742355e-01 | 0.8526631 | -0.1937807402 | 1.048275e-01 | 3.724992e-01 |
| 0.9949051 | 0.1054459168  | 6.262073e-01 | 0.9689755 | -0.2220321931 | 2.100501e-01 | 5.205014e-01 |
| 0.9949051 | 0.0156134398  | 9.325449e-01 | 0.9969722 | 0.3348584011  | 4.655485e-02 | 2.371889e-01 |
| 0.8805172 | 0.1337559248  | 2.563244e-01 | 0.9016579 | -0.0183914231 | 8.633485e-01 | 9.515996e-01 |
| 0.9949051 | 0.0659515980  | 5.872580e-01 | 0.9641086 | -0.0387963887 | 7.097710e-01 | 8.762099e-01 |
| 0.5133973 | 0.3730592099  | 1.875218e-02 | 0.5037516 | -0.1072424436 | 5.717056e-01 | 8.131842e-01 |
| 0.7342939 | 0.4336279223  | 4.236519e-01 | 0.9430561 | -0.3038156954 | 2.516217e-01 | 5.601071e-01 |
| 0.9949051 | 0.0502869977  | 7.121789e-01 | 0.9733364 | -0.0962147415 | 4.101671e-01 | 6.975791e-01 |
| 0.9949051 | -0.0907766256 | 6.353970e-01 | 0.9689755 | 1.0088288223  | 9.727631e-04 | 1.236350e-02 |
| 0.2019302 | 0.0372301561  | 8.312929e-01 | 0.9964090 | -0.4391591684 | 2.836400e-03 | 2.865491e-02 |
| 0.9961627 | -0.4167726055 | 7.047349e-02 | 0.7921508 | -0.0710030989 | 7.575410e-01 | 8.905775e-01 |
| 0.6918844 | -0.0448159623 | 8.599625e-01 | 0.9969722 | 0.0841688723  | 3.066371e-01 | 9.220939e-01 |
| 0.9949051 | -0.4784299389 | 9.877313e-04 | 0.1459373 | 0.1253417769  | 5.361860e-01 | 7.882615e-01 |
| 0.9379996 | -0.0615308648 | 8.091276e-01 | 0.9957784 | -0.2852541866 | 1.459799e-01 | 4.367095e-01 |
| 0.8394240 | -0.2567925007 | 4.042904e-01 | 0.9430561 | 0.6238697864  | 6.109396e-02 | 2.794946e-01 |
| 0.9210048 | -0.4724133125 | 2.914427e-01 | 0.8286466 | 0.8245595758  | 4.743601e-01 | 7.506714e-01 |
| 0.6918369 | -0.1646157941 | 4.478956e-01 | 0.9515413 | -0.0908774738 | 7.088593e-01 | 8.762099e-01 |
| 0.9148164 | -0.1708771402 | 4.119431e-01 | 0.9430561 | -0.1704881454 | 3.802230e-01 | 6.707992e-01 |
| 0.9961627 | 0.2478058761  | 2.492339e-01 | 0.8975264 | 0.0564826868  | 7.599672e-01 | 8.905775e-01 |
| 0.8394240 | -0.3056907202 | 2.211421e-01 | 0.8801009 | -0.0816929016 | 8.020214e-01 | 9.207928e-01 |
| 0.9210048 | -0.2164503197 | 3.422283e-01 | 0.9398602 | -0.1090806022 | 5.123697e-01 | 7.784331e-01 |
| 0.9949051 | 0.1557309211  | 1.368198e-01 | 0.9689755 | -0.1074964127 | 6.191226e-01 | 8.433108e-01 |
| 0.9949051 | 0.0800022023  | 8.852530e-01 | 0.9969722 | -1.2503980474 | 2.893664e-02 | 1.785439e-01 |
| 0.9696873 | -0.6709313928 | 3.811771e-02 | 0.6813116 | -0.9419861023 | 7.588287e-03 | 6.546975e-02 |
| 0.7251512 | -0.1708406355 | 5.241186e-01 | 0.9641086 | 0.0704294519  | 8.465154e-01 | 9.481630e-01 |
| 0.7251512 | 0.3965308396  | 2.015009e-01 | 0.8526631 | 0.3622138181  | 1.688769e-01 | 4.676259e-01 |
| 0.5190755 | 0.0939657689  | 7.122834e-01 | 0.9733364 | 0.1169247913  | 6.713910e-01 | 8.607204e-01 |
| 0.9949051 | -0.2703396510 | 1.972323e-01 | 0.8526631 | 0.0953291516  | 6.288656e-01 | 8.433108e-01 |
| 0.9949051 | -0.5028163687 | 9.527446e-02 | 0.7921508 | -0.0494008677 | 8.691773e-01 | 9.529580e-01 |
| 0.8194410 | -0.3328617962 | 8.217172e-02 | 0.7921508 | -0.1848420946 | 4.565661e-01 | 6.539822e-01 |
| 0.9949051 | -0.6409817722 | 3.565965e-02 | 0.6690430 | -0.5608838841 | 6.326061e-02 | 2.821662e-01 |
| 0.9148164 | -0.1485299034 | 5.710135e-01 | 0.9641086 | 0.0459166703  | 8.285536e-01 | 9.372819e-01 |
| 0.5133973 | -0.0494167844 | 7.993029e-01 | 0.9957784 | -0.4721043072 | 2.649387e-03 | 2.703053e-02 |
| 0.8194410 | -0.1087965282 | 4.189925e-01 | 0.9430561 | -0.0759578082 | 6.297907e-01 | 7.878622e-01 |
| 0.8194410 | -0.1301341038 | 5.527712e-01 | 0.9641086 | -0.1093998825 | 5.808879e-01 | 8.225914e-01 |
| 0.9949051 | -0.2463115749 | 2.770426e-01 | 0.9110414 | 0.1473967714  | 4.900262e-01 | 7.621199e-01 |
| 0.8394240 | -0.3051882628 | 2.261823e-01 | 0.8836164 | -0.1769775402 | 5.236822e-01 | 7.867567e-01 |
| 0.7685693 | -0.3349698256 | 9.714107e-03 | 0.3705021 | -0.1658900022 | 4.722032e-01 | 7.506714e-01 |
| 0.7811016 | -0.1286931577 | 5.133156e-01 | 0.9641086 | -0.0849883384 | 7.220207e-01 | 8.762099e-01 |
| 0.7696781 | 0.1997951041  | 6.468605e-01 | 0.9689755 | -0.1341768122 | 6.200152e-01 | 8.433108e-01 |
| 0.9949051 | -0.6728475261 | 1.109809e-01 | 0.8166268 | -0.4817135012 | 2.280415e-01 | 5.365081e-01 |
| 0.8477725 | 0.0904511482  | 7.619705e-01 | 0.9864723 | -0.0277829907 | 9.218517e-01 | 9.834194e-01 |
| 0.9696873 | -0.6979925682 | 9.596489e-05 | 0.0626585 | -0.0526826819 | 8.138570e-01 | 9.267620e-01 |
| 0.9949051 | -3.3833259298 | 2.247950e-01 | 0.8836164 | -3.4969965871 | 2.181499e-01 | 5.283877e-01 |
| 0.9210048 | 0.8455320768  | 1.973725e-01 | 0.8526631 | 0.5441676927  | 4.916797e-01 | 7.639864e-01 |
| 0.9949051 | -0.1954254275 | 6.115971e-02 | 0.7921508 | -0.2735112051 | 1.345016e-02 | 1.030432e-01 |
| 0.9949051 | -0.7056160858 | 6.347644e-03 | 0.3216097 | -0.4165572137 | 1.760153e-01 | 4.802300e-01 |
| 0.9923046 | 0.4658680243  | 1.406403e-01 | 0.8166268 | -0.5649771373 | 2.396793e-01 | 5.481636e-01 |
| 0.9949051 | 0.0181622055  | 6.680688e-01 | 0.9717521 | -0.1257877021 | 6.465856e-01 | 8.520225e-01 |
| 0.9949051 | -0.0770433130 | 3.529962e-01 | 0.9430561 | -0.0926231801 | 2.140411e-01 | 5.227202e-01 |
| 0.9923046 | -0.0799328916 | 4.730390e-01 | 0.9641086 | -0.1966698507 | 2.047892e-01 | 5.128408e-01 |
| 0.9949051 | -0.1318602814 | 4.349356e-01 | 0.9482489 | 0.0966061902  | 6.387004e-01 | 8.511205e-01 |
| 0.9949051 | -0.0352137990 | 8.027971e-01 | 0.9957784 | -0.2623285776 | 3.798606e-02 | 2.110347e-01 |
| 0.9949051 | 0.0240315237  | 8.715882e-01 | 0.9969722 | 0.0109409355  | 9.428291e-01 | 9.835175e-01 |
| 0.9949051 | -0.1049778071 | 6.578481e-01 | 0.9689755 | -0.1494341151 | 4.999566e-01 | 7.644874e-01 |
| 0.8194410 | -0.0575180224 | 8.123714e-01 | 0.9957784 | -0.2049502237 | 3.075814e-01 | 6.214128e-01 |
| 0.9210048 | 0.1308204153  | 4.018579e-01 | 0.9430561 | 0.0175188724  | 8.981652e-01 | 9.695263e-01 |
| 0.8194410 | -0.0023491116 | 9.839758e-01 | 0.9969722 | -0.0167289489 | 8.027605e-01 | 9.207928e-01 |
| 0.9949051 | -0.0034993749 | 9.810814e-01 | 0.9969722 | -0.0492503313 | 7.172306e-01 | 8.762099e-01 |
| 0.9949051 | -0.0133079381 | 9.793542e-01 | 0.9969722 | 2.6596973847  | 6.989964e-05 | 2.058028e-03 |
| 0.9949051 | -0.0137743505 | 9.781453e-01 | 0.9969722 | 2.2639709916  | 2.213157e-04 | 4.433815e-03 |
| 0.9949051 | 0.4823142433  | 5.499141e-01 | 0.9641086 | 0.6903982974  | 3.860676e-01 | 6.760473e-01 |
| 0.9949051 | 0.45897297472 | 3.919744e-02 | 0.6813116 | -0.0199       |              |              |



|           |                |              |           |               |              |              |
|-----------|----------------|--------------|-----------|---------------|--------------|--------------|
| 0.9949051 | -0.0114201501  | 9.523048e-01 | 0.9969722 | -0.0837007966 | 6.417793e-01 | 8.512682e-01 |
| 0.9949051 | -0.1580565560  | 9.558527e-02 | 0.7921508 | -0.2212158820 | 4.123288e-02 | 2.235654e-01 |
| 0.8918844 | -0.3911833634  | 3.113927e-02 | 0.6526535 | -0.0339582422 | 8.504188e-01 | 9.481630e-01 |
| 0.9949051 | 0.2924679757   | 5.927756e-01 | 0.9641086 | -0.1522495946 | 6.450009e-01 | 8.512682e-01 |
| 0.9949051 | -0.0669769873  | 3.757158e-01 | 0.9430561 | -0.1265055603 | 6.906611e-02 | 2.966587e-01 |
| 0.9275791 | -0.00762222495 | 9.469195e-01 | 0.9969722 | -0.1408528477 | 3.612140e-01 | 6.629639e-01 |
| 0.7685693 | -0.0384150041  | 8.309727e-01 | 0.9964090 | -0.2310558802 | 2.052902e-01 | 5.130084e-01 |
| 0.9949051 | 0.3300329318   | 5.542799e-01 | 0.9641086 | 1.7386498022  | 5.851034e-04 | 8.538176e-03 |
| 0.9949051 | -0.1081568540  | 2.503880e-01 | 0.8975264 | -0.2075327307 | 2.141813e-02 | 1.438422e-01 |
| 0.9949051 | 0.2473287565   | 7.143279e-01 | 0.9733364 | 0.0637186043  | 8.570337e-01 | 9.513893e-01 |
| 0.9949051 | -0.2073380684  | 6.102525e-01 | 0.9641086 | 1.1129211407  | 5.445028e-06 | 6.436023e-04 |
| 0.9949051 | 0.6460223422   | 2.367285e-01 | 0.8975264 | 1.8171481398  | 1.393720e-05 | 8.670406e-04 |
| 0.9867694 | -0.0623976419  | 9.112599e-01 | 0.9969722 | 2.4121790777  | 6.256440e-04 | 8.909773e-03 |
| 0.5937207 | 1.2333131868   | 2.940834e-01 | 0.9286466 | -0.7089087867 | 3.551737e-01 | 6.629639e-01 |
| 0.9949051 | 0.0093872794   | 9.621745e-01 | 0.9969722 | -0.3821481334 | 6.260997e-02 | 2.813791e-01 |
| 0.2019302 | -0.0758999862  | 5.550568e-01 | 0.9641086 | -0.2805005266 | 1.260268e-02 | 9.800240e-02 |
| 0.9949051 | 0.4230931817   | 4.007341e-01 | 0.9430561 | 1.8400100172  | 1.404287e-04 | 3.254641e-03 |
| 0.9379096 | 0.2292415507   | 5.941712e-01 | 0.9641086 | 1.7940745340  | 5.210093e-05 | 1.811274e-03 |
| 0.9949051 | 0.1751490751   | 5.148072e-01 | 0.9641086 | -0.1863962616 | 3.617139e-01 | 6.629639e-01 |
| 0.8598556 | -0.3767710703  | 3.299151e-01 | 0.9366787 | 0.0860508872  | 7.955011e-01 | 9.182454e-01 |
| 0.9949051 | 0.1323852064   | 3.895482e-01 | 0.9430561 | -0.2013213164 | 1.861433e-01 | 4.889364e-01 |
| 0.8730639 | 0.1092349927   | 4.042711e-01 | 0.9430561 | -0.1083578169 | 3.038843e-01 | 6.214128e-01 |
| 0.9653626 | 0.1821730082   | 2.324850e-01 | 0.8921990 | 0.0872138794  | 5.368096e-01 | 7.882615e-01 |
| 0.9949051 | 0.0222685393   | 8.452639e-01 | 0.9969722 | -0.0053503766 | 9.669478e-01 | 9.912683e-01 |
| 0.8612982 | 0.5693359534   | 4.052670e-01 | 0.9430561 | -0.1287690076 | 7.971794e-01 | 9.183880e-01 |
| 0.9949051 | 0.2038548079   | 4.483997e-01 | 0.9515413 | 0.3298580865  | 9.506257e-02 | 3.558867e-01 |
| 0.9949051 | -0.0273983124  | 7.723893e-01 | 0.9020566 | -0.1449729497 | 1.288687e-01 | 4.082215e-01 |
| 0.9949051 | 0.5312803534   | 3.441100e-01 | 0.9398602 | 0.9064074591  | 8.006445e-02 | 3.293325e-01 |
| 0.9949051 | 0.3767893821   | 3.372699e-01 | 0.9366787 | -0.1528362965 | 5.205836e-01 | 7.867567e-01 |
| 0.9949051 | -0.1460639730  | 6.303056e-01 | 0.9699755 | -0.6251562976 | 1.351243e-02 | 1.030432e-01 |
| 0.5133973 | 0.1381828053   | 3.693345e-01 | 0.9430561 | -0.1540203936 | 1.922145e-01 | 4.928717e-01 |
| 0.9210048 | 0.1478493862   | 3.090105e-01 | 0.9288274 | 0.1229449993  | 1.922285e-01 | 4.928717e-01 |
| 0.9949051 | 0.1211202013   | 3.957342e-01 | 0.9430561 | -0.2609817606 | 1.011780e-01 | 3.676741e-01 |
| 0.9949051 | 0.0342578988   | 7.896756e-01 | 0.9957784 | -0.0975930700 | 3.765294e-01 | 6.707992e-01 |
| 0.9949051 | 0.6509797091   | 4.736360e-01 | 0.9641086 | 3.9514859567  | 5.446421e-03 | 4.914252e-02 |
| 0.9379096 | -0.1249860136  | 2.532702e-01 | 0.9016579 | -0.1806816890 | 6.021651e-02 | 2.791213e-01 |
| 0.7194638 | -0.0193232862  | 8.878891e-01 | 0.9969722 | 0.0025156190  | 9.862754e-01 | 9.950155e-01 |
| 0.9949051 | -0.2191234688  | 3.983609e-01 | 0.9430561 | -0.2735563585 | 3.625748e-01 | 6.629639e-01 |
| 0.8394240 | -0.0358130352  | 6.682732e-01 | 0.9969722 | -0.2233176456 | 1.614376e-01 | 4.589055e-01 |
| 0.8598556 | -0.4341910787  | 1.172741e-02 | 0.3850499 | -0.1938012136 | 3.086403e-01 | 6.214870e-01 |
| 0.2019302 | 0.1666719547   | 2.741915e-01 | 0.9110414 | -0.1864665618 | 3.611835e-02 | 2.050213e-01 |
| 0.9509918 | 0.0321940384   | 9.032744e-01 | 0.9969722 | -0.0545382434 | 8.503270e-01 | 9.481630e-01 |
| 0.9949051 | -0.1799054526  | 5.133389e-01 | 0.9641086 | 1.0280256829  | 2.458112e-04 | 4.762236e-03 |
| 0.9949051 | 0.05177171807  | 5.792207e-01 | 0.9641086 | 0.1486943073  | 2.006958e-01 | 5.090609e-01 |
| 0.9692638 | 0.1273632113   | 5.953813e-01 | 0.9641086 | -0.1843200406 | 3.404845e-01 | 6.522734e-01 |
| 0.9949051 | -0.0542207855  | 5.509168e-01 | 0.9641086 | 0.0864467721  | 2.397636e-01 | 5.481836e-01 |
| 0.9148164 | 0.1936117693   | 4.871685e-01 | 0.9641086 | -0.1214228191 | 6.359460e-01 | 8.493805e-01 |
| 0.9949051 | -0.1917263249  | 1.047367e-01 | 0.8091427 | 0.0479536871  | 7.211710e-01 | 8.762099e-01 |
| 0.9949051 | -0.0482921183  | 6.169211e-01 | 0.9641086 | -0.2397396858 | 1.545454e-02 | 1.120756e-01 |
| 0.8394240 | -0.0290547749  | 8.594006e-01 | 0.9969722 | 0.0238078284  | 8.955353e-01 | 9.686740e-01 |
| 0.9949051 | -0.2915928425  | 5.897041e-02 | 0.7921508 | -0.1908167290 | 1.406911e-01 | 4.313058e-01 |
| 0.9551136 | -0.1143342869  | 1.551043e-01 | 0.8386867 | -0.1624837070 | 4.683461e-02 | 2.375902e-01 |
| 0.7194638 | -0.2319468099  | 3.957647e-02 | 0.6813116 | -0.0014616961 | 8.976889e-01 | 9.950155e-01 |
| 0.9949051 | -0.3261335275  | 9.210699e-03 | 0.3705021 | -0.1230906483 | 4.035875e-01 | 6.943819e-01 |
| 0.9949051 | 0.1795472181   | 1.699390e-01 | 0.8467562 | -0.2077040284 | 1.989182e-01 | 5.056372e-01 |
| 0.9949051 | 0.0739583978   | 8.195038e-01 | 0.9957784 | 1.4996359235  | 1.281213e-05 | 8.413298e-04 |
| 0.9949051 | -0.0538192829  | 5.635648e-01 | 0.9641086 | -0.0302882036 | 7.465429e-01 | 8.850046e-01 |
| 0.9949051 | 0.4054888382   | 1.118903e-01 | 0.8166268 | 0.2457963542  | 2.585589e-01 | 5.701802e-01 |
| 0.8451285 | 0.1641320536   | 2.275026e-01 | 0.8836164 | 0.0314350989  | 7.601172e-01 | 8.905775e-01 |
| 0.9949051 | 0.1132284891   | 3.368229e-01 | 0.9366787 | 0.1386314671  | 2.447795e-01 | 5.554637e-01 |
| 0.9210048 | 0.5187791488   | 3.069429e-01 | 0.9288274 | 1.5253306990  | 7.533647e-03 | 6.546975e-02 |
| 0.9949051 | 0.0660789260   | 6.517749e-01 | 0.9689755 | 0.1950505895  | 1.962457e-01 | 4.999809e-01 |
| 0.8394240 | -0.1096727484  | 1.381728e-01 | 0.8166268 | -0.0469403498 | 5.568462e-01 | 8.036535e-01 |
| 0.7342939 | 0.1573711730   | 2.774745e-01 | 0.9110414 | 0.0298962152  | 8.541642e-01 | 9.506799e-01 |
| 0.8210171 | 0.0146063248   | 9.405175e-01 | 0.9969722 | -0.3028524282 | 2.669699e-02 | 1.699335e-01 |
| 0.8477725 | 0.0280438132   | 7.879235e-01 | 0.9957784 | -0.0799223863 | 3.603204e-01 | 6.629639e-01 |
| 0.9949051 | 0.0828922569   | 5.389396e-01 | 0.9641086 | -0.2812819300 | 5.817472e-03 | 5.179572e-02 |
| 0.9949051 | -0.1329659922  | 6.235455e-02 | 0.7921508 | -0.1660892995 | 5.171483e-02 | 2.536387e-01 |
| 0.7815947 | 0.1248193833   | 1.588364e-01 | 0.8386867 | -0.0747500147 | 2.865522e-01 | 6.045220e-01 |
| 0.9949051 | 0.0008284783   | 9.898433e-01 | 0.9997294 | -0.0933595111 | 3.583457e-01 | 6.675072e-01 |
| 0.9949051 | 0.0397603075   | 9.504990e-01 | 0.9969722 | -0.9833463937 | 8.587943e-02 | 3.339128e-01 |
| 0.8539066 | -0.2018314511  | 4.721934e-02 | 0.7645652 | 0.0204554661  | 8.662616e-01 | 9.515996e-01 |
| 0.9949051 | 0.0359512888   | 8.345855e-01 | 0.9969722 | 0.0368521922  | 8.662238e-01 | 9.515996e-01 |
| 0.8477725 | 0.6592121363   | 3.863885e-01 | 0.9430561 | -0.6958526914 | 1.312120e-01 | 4.113862e-01 |
| 0.9949051 | 0.3361699636   | 5.050084e-01 | 0.9641086 | 2.0567723378  | 5.051266e-05 | 1.809271e-03 |
| 0.9824103 | 0.2078738307   | 1.220082e-01 | 0.8166268 | 0.0609203110  | 6.704145e-01 | 8.607204e-01 |
| 0.9949051 | -0.0945356873  | 2.695872e-01 | 0.9106469 | 0.0293818957  | 6.833713e-01 | 8.676100e-01 |
| 0.9949051 | 0.0387060005   | 7.058140e-01 | 0.9733364 | 0.0103209634  | 9.341952e-01 | 9.835175e-01 |
| 0.9380386 | -0.0122629346  | 9.491299e-01 | 0.9969722 | -0.0928400797 | 5.483290e-01 | 7.942706e-01 |
| 0.9210048 | 0.0431877675   | 8.912183e-01 | 0.9969722 | 0.4817423073  | 7.929895e-02 | 3.288820e-01 |
| 0.9949051 | -0.0152445330  | 8.645048e-01 | 0.9969722 | -0.1881763944 | 1.542282e-01 | 4.468082e-01 |
| 0.9949051 | 0.0208464878   | 8.794803e-01 | 0.9969722 | -0.2220628603 | 1.691319e-01 | 4.714951e-01 |
| 0.9551136 | 0.0786918962   | 7.875836e-01 | 0.9957784 | -0.0242245602 | 9.410234e-01 | 9.835175e-01 |
| 0.8741974 | 0.0338025263   | 6.925196e-01 | 0.9733364 | 0.0049457490  | 9.751245e-01 | 9.927624e-01 |
| 0.6504978 | 0.2943718771   | 1.655989e-01 | 0.8467562 | -0.0613708702 | 5.223210e-01 | 7.867567e-01 |
| 0.9949051 | 0.1229279473   | 1.272207e-01 | 0.8166268 | 0.1048273104  | 1.908377e-01 | 4.925112e-01 |
| 0.9949051 | 0.5187674220   | 2.023446e-01 | 0.8526631 | 0.7217565661  | 1.195949e-01 | 3.995752e-01 |
| 0.8805172 | -0.3178338357  | 7.907473e-02 | 0.7921508 | -0.1976717154 | 2.275299e-01 | 5.378807e-01 |
| 0.9696873 | 0.0915597369   | 3.034874e-01 | 0.9286466 | -0.0338479778 | 7.438376e-01 | 8.842500e-01 |
| 0.2019302 | -0.10296683072 | 5.247132e-01 | 0.9641086 | 0.3181406705  | 8.080069e-02 | 3.293325e-01 |
| 0.9949051 | 0.1478724400   | 7.596429e-01 | 0.9855489 | 2.5185010666  | 6.909292e-05 | 2.058028e-03 |
| 0.9949051 | -0.2479498339  | 4.012810e-01 | 0.9430561 | -0.2534335033 | 3.463852e-01 | 7.297749e-01 |
| 0.8791060 | -0.3544415635  | 4.167783e-01 | 0.9430561 | -0.4678151374 | 2.973950e-01 | 6.166427e-01 |
| 0.9949051 | -0.1381717002  | 3.785216e-01 | 0.9430561 | -0.4343894544 | 3.656435e-02 | 2.058050e-01 |
| 0.9210048 | -0.2209737865  | 6.282979e-02 | 0.7921508 | -0.2182883186 | 1.359143e-01 | 4.216554e-01 |
| 0.9949051 | -0.4489108274  | 1.699689e-01 | 0.8467562 | 0.1409568200  | 6.452930e-01 | 8.512682e-01 |
| 0.9949051 | -0.0797721904  | 7.123217e-01 | 0.9733364 | -0.3771030338 | 7.886909e-02 | 3.288820e-01 |
| 0.9949051 | -0.0075761909  | 9.457212e-01 | 0.9969722 | 0.0678237047  | 6.286058e-01 | 8.433108e-01 |
| 0.9923046 | 0.2142492779   | 3.306911e-01 | 0.9366787 | -0.2411491240 | 4.064870e-01 | 9.952547e-01 |
| 0.8805172 | -0.2004545973  | 1.117559e-01 | 0.8166268 | -0.2281545467 | 1.678533e-02 | 1.188040e-01 |
| 0.9949051 | -0.0955432760  | 6.519019e-01 | 0.9689755 | -0.4009904186 | 7.915589e-02 | 3.288820e-01 |
| 0.9949051 | -0.0167780092  | 9.356283e-01 | 0.9969722 | -0.2130338686 | 4.284445e-01 | 7.159073e-01 |
| 0.9949051 | -0.2313105445  | 1.005697e-02 | 0.3705021 | 0.1096009249  | 3.728729e-01 | 6.687949e-01 |
| 0.9949051 | 0.0742941882   | 7.076242e-01 | 0.9733364 | -0.6177818268 | 4.069997e-03 | 3.848305e-02 |
| 0.9148164 | 0.1493966986   | 2.872268e-01 | 0.9286466 | -0.1048538081 | 4.222842e-01 | 7.260833e-01 |
| 0.9949051 | -0.1181548212  | 1.440466e-01 | 0.8166268 | -0.1          |              |              |

|           |                |              |           |               |              |              |
|-----------|----------------|--------------|-----------|---------------|--------------|--------------|
| 0.8899481 | 0.4754288980   | 4.292473e-01 | 0.9478644 | -0.0226841126 | 9.575417e-01 | 9.906899e-01 |
| 0.9949051 | -0.2798716907  | 3.743670e-02 | 0.6813116 | -0.0417314001 | 7.617376e-01 | 8.905775e-01 |
| 0.9949051 | 0.5204771416   | 3.518434e-01 | 0.9430561 | 2.1144802943  | 1.199883e-04 | 2.894413e-03 |
| 0.9949051 | 0.0498608432   | 6.067635e-01 | 0.9641086 | -0.1068482210 | 2.776535e-01 | 5.897332e-01 |
| 0.9949051 | -0.3456664168  | 3.253519e-03 | 0.2875687 | -0.2594330050 | 5.800097e-02 | 2.731360e-01 |
| 0.8194410 | -0.3066392728  | 2.286622e-01 | 0.8836164 | -0.2669811317 | 3.451105e-01 | 6.539822e-01 |
| 0.9949051 | 0.1879761935   | 5.344340e-01 | 0.9641086 | 0.5990813949  | 5.357677e-03 | 4.871365e-02 |
| 0.8394240 | 2.2338882522   | 3.446684e-01 | 0.9398602 | -1.4153876606 | 3.169821e-01 | 6.316783e-01 |
| 0.9949051 | 0.0128093612   | 9.181263e-01 | 0.9969722 | -0.1621888348 | 2.769389e-01 | 5.897332e-01 |
| 0.8598556 | -0.1802826462  | 7.078991e-01 | 0.9733364 | -0.2362753952 | 6.047062e-01 | 8.359439e-01 |
| 0.8477725 | -0.4693728041  | 7.064771e-02 | 0.7921508 | 0.0602431311  | 8.699748e-01 | 9.529580e-01 |
| 0.9949051 | 0.1769007075   | 3.781679e-01 | 0.9430561 | 0.6073990252  | 1.845276e-03 | 1.834638e-02 |
| 0.9379096 | -0.4473254356  | 3.904793e-01 | 0.9430561 | -0.7323395587 | 1.752905e-01 | 4.802300e-01 |
| 0.9210048 | -0.1622917361  | 5.191269e-01 | 0.9641086 | 0.5573333448  | 8.452824e-02 | 3.330413e-01 |
| 0.9949051 | 0.0857607830   | 5.031747e-01 | 0.9641086 | -0.2134533710 | 1.568290e-01 | 4.523748e-01 |
| 0.8497626 | 0.1999992518   | 5.787972e-01 | 0.9641086 | -0.3475647995 | 3.957352e-02 | 2.175623e-01 |
| 0.8264615 | -0.0604444468  | 6.499649e-01 | 0.9689755 | -0.0226153575 | 8.895297e-01 | 9.646093e-01 |
| 0.9949051 | 0.5834521256   | 5.007482e-01 | 0.9641086 | 4.0021394629  | 1.670543e-05 | 9.872909e-04 |
| 0.9949051 | 0.6541515791   | 1.289600e-01 | 0.8166268 | 1.8529996240  | 7.187570e-05 | 2.072124e-03 |
| 0.9949051 | 0.8684203726   | 1.874190e-01 | 0.8526631 | 1.0152376396  | 1.574430e-01 | 4.527923e-01 |
| 0.9210048 | -0.1260501035  | 2.112330e-01 | 0.8699563 | -0.0876583293 | 3.065781e-01 | 6.214128e-01 |
| 0.9379096 | -0.1902542246  | 6.782323e-02 | 0.7921508 | -0.1546255553 | 2.702101e-01 | 5.849604e-01 |
| 0.9949051 | -0.4491426292  | 9.218059e-02 | 0.7921508 | -0.0977454649 | 6.614096e-01 | 8.563248e-01 |
| 0.9949051 | 0.1005251559   | 6.762806e-01 | 0.9717521 | -0.0994049769 | 6.093706e-01 | 8.375303e-01 |
| 0.8329325 | -4.480829350   | 1.260611e-01 | 0.8166268 | -3.3788657293 | 1.522183e-01 | 4.442521e-01 |
| 0.8394240 | 0.1562646849   | 2.791127e-01 | 0.9128476 | 0.0206242171  | 9.965561e-01 | 9.686740e-01 |
| 0.9949051 | 0.0078294357   | 9.552644e-01 | 0.9969722 | -0.2683371638 | 3.485390e-02 | 2.004620e-01 |
| 0.9949051 | -0.0798824409  | 3.131319e-01 | 0.9300968 | -0.1077994622 | 3.384074e-01 | 6.512563e-01 |
| 0.8532963 | 0.2862641426   | 7.629527e-01 | 0.9866632 | -0.2545801777 | 7.014386e-01 | 8.762099e-01 |
| 0.9949051 | -0.1064699049  | 4.244550e-01 | 0.9430561 | -0.0579675122 | 6.236646e-01 | 8.433108e-01 |
| 0.9949051 | -0.1198649955  | 4.306287e-01 | 0.9478644 | 0.1545017613  | 4.268514e-01 | 7.146435e-01 |
| 0.9949051 | 0.3066009753   | 2.579799e-01 | 0.9021664 | 0.1237189095  | 6.859143e-01 | 8.689718e-01 |
| 0.9949051 | 0.2711756945   | 5.960226e-01 | 0.9641086 | 2.3511468127  | 1.802204e-05 | 1.014295e-03 |
| 0.8194410 | 0.0152274175   | 9.535961e-01 | 0.9969722 | -0.2299247738 | 3.420842e-01 | 6.539822e-01 |
| 0.9949051 | -0.1021224172  | 3.929676e-01 | 0.9430561 | 0.01177038521 | 8.926647e-01 | 9.671216e-01 |
| 0.9444828 | 1.5541474941   | 3.449347e-01 | 0.9398602 | 0.5646352767  | 3.790870e-01 | 6.707992e-01 |
| 0.9949051 | 0.1759731091   | 5.821209e-01 | 0.9641086 | 1.5624784042  | 3.757161e-05 | 1.588059e-03 |
| 0.8899481 | 0.4142831834   | 1.033407e-01 | 0.8036101 | -0.1601894394 | 3.351592e-01 | 6.473173e-01 |
| 0.9949051 | -0.0106791579  | 9.027952e-01 | 0.9969722 | -0.2143708456 | 1.291665e-01 | 4.082215e-01 |
| 0.9949051 | 0.0531632820   | 7.803440e-01 | 0.9932650 | -0.4363720334 | 2.829515e-02 | 1.785439e-01 |
| 0.9949051 | 0.2416548799   | 1.227830e-01 | 0.8166268 | -0.3133405992 | 1.082622e-02 | 8.429655e-02 |
| 0.9949051 | -0.1646683925  | 5.028007e-01 | 0.9641086 | 1.1920517739  | 7.951265e-05 | 2.237713e-03 |
| 0.9210048 | 0.0025793423   | 9.842886e-01 | 0.9969722 | 0.0012548502  | 9.933318e-01 | 9.950155e-01 |
| 0.9949051 | 0.5492614026   | 3.889304e-01 | 0.9430561 | 2.1103176715  | 1.599277e-03 | 1.817640e-02 |
| 0.9949051 | 0.3590252293   | 3.559308e-01 | 0.9430561 | -0.0976816851 | 7.190759e-01 | 8.782099e-01 |
| 0.9949051 | 0.1628603078   | 1.710459e-01 | 0.8467562 | -0.1383039305 | 1.746136e-02 | 1.221262e-01 |
| 0.9949051 | -0.3241946506  | 8.544282e-03 | 0.3705021 | -0.1994868223 | 1.634034e-01 | 4.642856e-01 |
| 0.9949051 | 0.1356647779   | 3.849728e-01 | 0.9430561 | -0.1856125246 | 2.086873e-01 | 5.182110e-01 |
| 0.9949051 | -0.3924401087  | 6.348943e-01 | 0.9689755 | -1.6259305134 | 1.840673e-03 | 1.996032e-02 |
| 0.9210048 | 0.6306386040   | 6.198927e-02 | 0.7921508 | 0.6839209061  | 3.446131e-02 | 1.969729e-01 |
| 0.8194410 | 0.0672642990   | 5.378581e-01 | 0.9641086 | -0.0327199906 | 7.830147e-01 | 9.081934e-01 |
| 0.9949051 | 0.0096322511   | 9.521762e-01 | 0.9969722 | -0.0967774718 | 5.438340e-01 | 7.934534e-01 |
| 0.8805172 | 0.0409200743   | 8.075559e-01 | 0.9957784 | -0.0787554906 | 7.472374e-01 | 8.850046e-01 |
| 0.9949051 | -0.2499222006  | 6.946817e-04 | 0.1173020 | 0.0140051114  | 9.042656e-01 | 9.710339e-01 |
| 0.9949051 | -0.2741394856  | 2.183758e-03 | 0.2868002 | -0.0408428737 | 7.457435e-01 | 8.850046e-01 |
| 0.9949051 | -0.3846000036  | 2.340057e-02 | 0.5531895 | 0.01723976733 | 9.306832e-01 | 9.835175e-01 |
| 0.7733569 | 0.4288153046   | 6.386070e-01 | 0.9689755 | -0.0469287977 | 9.469943e-01 | 9.835175e-01 |
| 0.9949051 | 0.1802553465   | 5.937544e-01 | 0.9641086 | 1.8397460648  | 8.776333e-06 | 7.408616e-04 |
| 0.9949051 | -0.0662094408  | 8.661196e-01 | 0.9969722 | -0.1440980194 | 7.205106e-01 | 8.782099e-01 |
| 0.9949051 | -0.0057525134  | 9.541226e-01 | 0.9969722 | 0.2051806391  | 1.248744e-01 | 4.004487e-01 |
| 0.9210048 | -0.1245576332  | 1.170071e-01 | 0.8166268 | -0.0324082623 | 6.735614e-01 | 8.625673e-01 |
| 0.9923046 | 0.2353159448   | 2.369364e-01 | 0.8975264 | 0.2606352681  | 1.780381e-01 | 4.751087e-01 |
| 0.9949051 | 0.4192410746   | 1.604325e-01 | 0.8390760 | 1.2597196899  | 9.514383e-05 | 2.499111e-03 |
| 0.9949051 | -0.2236600015  | 9.469564e-02 | 0.7921508 | 0.4257587397  | 1.773099e-02 | 1.232826e-01 |
| 0.8805172 | -0.0666715013  | 8.570028e-01 | 0.9969722 | 0.4139074171  | 2.719813e-01 | 5.856155e-01 |
| 0.9949051 | 0.0910197361   | 6.299617e-01 | 0.9689755 | -0.5569445247 | 1.371412e-02 | 1.039108e-01 |
| 0.9949051 | 0.7994688049   | 3.813920e-01 | 0.9430561 | -0.3119962003 | 3.496789e-01 | 6.564148e-01 |
| 0.9949051 | -0.2979541771  | 3.592795e-01 | 0.9430561 | 1.6090116576  | 1.236307e-03 | 1.476075e-02 |
| 0.9923046 | -0.1068576594  | 2.499421e-01 | 0.8975264 | -0.1859289558 | 6.630441e-02 | 3.344650e-01 |
| 0.8329325 | 0.1495793578   | 6.508061e-01 | 0.9689755 | 0.4760923929  | 1.898931e-01 | 4.922230e-01 |
| 0.9917395 | -0.0243897802  | 8.288528e-01 | 0.9964090 | 0.2892249221  | 1.815944e-02 | 1.255232e-01 |
| 0.9715057 | -0.00254955067 | 8.551711e-01 | 0.9969722 | -0.2529270653 | 4.601071e-02 | 2.354314e-01 |
| 0.9275791 | -0.0404544968  | 8.880950e-01 | 0.9733364 | 0.1034493467  | 1.139665e-01 | 3.920865e-01 |
| 0.8329325 | -0.2650901887  | 6.319306e-01 | 0.9689755 | 2.4665522972  | 5.828114e-03 | 5.179572e-02 |
| 0.8477725 | -0.1747455865  | 2.312194e-01 | 0.8902324 | -0.1397832205 | 3.324427e-01 | 6.431217e-01 |
| 0.9949051 | 0.1659275820   | 8.289908e-01 | 0.9964090 | -0.6865642057 | 2.236629e-01 | 5.330032e-01 |
| 0.9949051 | -0.0877657684  | 3.887632e-01 | 0.9430561 | -0.1053063022 | 2.909097e-01 | 6.064468e-01 |
| 0.9949051 | -0.0127170100  | 8.736995e-01 | 0.9969722 | 0.3748645397  | 7.657322e-03 | 6.558662e-02 |
| 0.8394240 | 0.4114268975   | 4.164180e-01 | 0.9430561 | -0.5249865217 | 4.272187e-02 | 2.277429e-01 |
| 0.9284320 | 0.1282773059   | 7.789948e-01 | 0.9932650 | -1.3855453737 | 2.900206e-02 | 1.785439e-01 |
| 0.8088570 | 0.0330940502   | 7.442523e-01 | 0.9796283 | -0.2662004833 | 8.443199e-02 | 3.330413e-01 |
| 0.9949051 | 0.2783552264   | 3.862843e-01 | 0.9430561 | 0.1003461134  | 7.604379e-01 | 8.905775e-01 |
| 0.9949051 | 0.2275764852   | 7.217873e-01 | 0.9733364 | 2.9299143163  | 4.095438e-05 | 1.613603e-03 |
| 0.9949051 | 0.0457332636   | 6.578436e-01 | 0.9689755 | -0.0655081370 | 3.590291e-01 | 6.629639e-01 |
| 0.9275791 | 0.0121025593   | 9.622646e-01 | 0.9969722 | 1.0296143858  | 3.185967e-04 | 5.718726e-03 |
| 0.9949051 | -0.0904714274  | 8.475094e-01 | 0.9969722 | -1.4971554150 | 9.789918e-03 | 7.855811e-02 |
| 0.9949051 | 0.0453719688   | 7.017433e-01 | 0.9733364 | 0.1127895821  | 3.709717e-01 | 6.676641e-01 |
| 0.9949051 | 0.4638292523   | 2.212690e-02 | 0.5337527 | -0.0536247852 | 7.809499e-01 | 8.905775e-01 |
| 0.9949051 | 0.0723147787   | 4.884461e-01 | 0.9641086 | -0.1070555373 | 3.455949e-01 | 6.539822e-01 |
| 0.9949051 | 0.1506816619   | 2.011735e-01 | 0.8526631 | 0.0086445420  | 9.420657e-01 | 9.835175e-01 |
| 0.8194410 | 0.0742414693   | 9.059069e-01 | 0.9969722 | 0.7645972534  | 8.553050e-02 | 3.339128e-01 |
| 0.9949051 | -0.0267283080  | 8.730997e-01 | 0.9969722 | 0.0749215406  | 6.789103e-01 | 8.656556e-01 |
| 0.9210048 | 0.0759652102   | 3.837233e-01 | 0.9430561 | -0.0127924331 | 8.485392e-01 | 9.481630e-01 |
| 0.9949051 | 0.2872726473   | 3.181008e-01 | 0.9300968 | 0.1186093871  | 6.226762e-01 | 8.433108e-01 |
| 0.9949051 | 0.3917773927   | 6.500972e-01 | 0.9689755 | 4.7028180359  | 4.059347e-06 | 5.997866e-04 |
| 0.9949051 | 0.0148084249   | 9.170917e-01 | 0.9969722 | 0.4496829456  | 1.025211e-03 | 1.289148e-02 |
| 0.9949051 | -0.0944635516  | 2.178242e-01 | 0.8800012 | -0.0919603552 | 3.645740e-01 | 6.629639e-01 |
| 0.9275791 | -0.0607869898  | 9.033177e-01 | 0.9969722 | -0.6804748291 | 2.106736e-01 | 5.209544e-01 |
| 0.9949051 | -0.0647063933  | 4.352678e-01 | 0.9482489 | 0.0696641950  | 4.681528e-01 | 7.506714e-01 |
| 0.8532963 | 0.2423239386   | 1.540454e-01 | 0.8386667 | -0.1228722746 | 5.397383e-01 | 7.905460e-01 |
| 0.9148164 | 0.0079177183   | 9.812467e-01 | 0.9969722 | -0.6471160059 | 4.591208e-02 | 2.354314e-01 |
| 0.9949051 | -0.0778364125  | 3.953800e-01 | 0.9430561 | -0.2392969852 | 2.046769e-02 | 1.398428e-01 |
| 0.9917395 | 0.6632836404   | 3.322018e-01 | 0.9366787 | -0.0818194540 | 9.102837e-01 | 9.730907e-01 |
| 0.9949051 | -0.0501056048  | 5.602578e-01 | 0.9641086 | -0.1261103805 | 3.435296e-01 | 6.539822e-01 |
| 0.8805172 | -0.1750615016  | 2.223890e-01 | 0.8820931 | -0.2145235315 | 4.920778e-02 | 2.440266e-01 |
| 0.9236575 | 0.3741443457   | 2.372515e-01 | 0.8975264 | 1.19          |              |              |



|           |                |              |           |                |               |              |
|-----------|----------------|--------------|-----------|----------------|---------------|--------------|
| 0.9949051 | 0.0144135616   | 9.524368e-01 | 0.9969722 | -0.3610732490  | 6.284609e-02  | 2.813791e-01 |
| 0.9109219 | -0.0887693908  | 5.146995e-01 | 0.9641086 | -0.0777129680  | 4.988731e-01  | 7.643323e-01 |
| 0.9949051 | -0.1364580403  | 1.089319e-01 | 0.8149209 | 0.0300423046   | 6.953956e-01  | 8.762099e-01 |
| 0.9949051 | 0.1724748702   | 5.316625e-01 | 0.9641086 | 1.2935442547   | 4.701120e-06  | 6.174137e-04 |
| 0.9949051 | -0.1751565860  | 4.622562e-02 | 0.7588705 | -0.1645868861  | 9.547591e-02  | 3.560017e-01 |
| 0.9949051 | -0.2086908563  | 7.455331e-02 | 0.7921508 | 0.0057591580   | 9.641062e-01  | 9.911619e-01 |
| 0.9949051 | -0.1016909166  | 2.017850e-01 | 0.8526631 | -0.1086603143  | 2.231280e-01  | 5.328026e-01 |
| 0.9949051 | -0.2163575267  | 1.934433e-02 | 0.5081163 | -0.1297272740  | 1.652860e-01  | 4.666833e-01 |
| 0.9696873 | 0.0325351869   | 9.343879e-01 | 0.9969722 | -0.0884384191  | 6.614421e-01  | 8.563248e-01 |
| 0.9949051 | -0.0466910636  | 5.044661e-01 | 0.9641086 | -0.1383071179  | 9.723395e-02  | 3.602838e-01 |
| 0.8805172 | -0.2978086497  | 4.489233e-02 | 0.7473625 | 0.0596010912   | 7.353384e-01  | 8.795259e-01 |
| 0.9210048 | 0.2153757908   | 3.364229e-01 | 0.9364851 | 0.1405865446   | 4.948598e-01  | 7.643323e-01 |
| 0.9949051 | -0.0280514647  | 8.525486e-01 | 0.9969722 | -0.0018982120  | 9.915415e-01  | 9.950155e-01 |
| 0.9949051 | 0.3866959128   | 4.168585e-01 | 0.9430561 | -0.1340641636  | 7.024294e-01  | 8.762099e-01 |
| 0.8532963 | -0.1120526165  | 6.928943e-01 | 0.9733364 | -0.0899947279  | 7.270473e-01  | 8.773616e-01 |
| 0.9949051 | 0.2164069107   | 7.712660e-01 | 0.9919874 | 3.0233410443   | 2.179950e-04  | 4.433815e-03 |
| 0.9949051 | -0.0844116522  | 6.607346e-01 | 0.9689755 | -0.2759514164  | 5.240593e-02  | 2.559662e-01 |
| 0.9379096 | -0.0393871367  | 6.722095e-01 | 0.9717521 | -0.1769933325  | 2.176688e-01  | 5.283051e-01 |
| 0.9949051 | 0.4089024205   | 2.570717e-01 | 0.9016579 | 1.4544447363   | 1.026492e-04  | 2.637637e-03 |
| 0.9949051 | 0.2845042046   | 6.130141e-01 | 0.9641086 | 2.7955520605   | 6.381597e-07  | 2.496980e-04 |
| 0.8194410 | 0.1811644792   | 2.436883e-01 | 0.8975264 | -0.0869670416  | 5.889497e-01  | 8.264179e-01 |
| 0.9949051 | -0.0895340532  | 3.087213e-01 | 0.8288274 | -0.0410742919  | 6.574407e-01  | 8.558314e-01 |
| 0.8805172 | -0.2260298859  | 3.522674e-03 | 0.2875687 | 0.0410233980   | 5.654652e-01  | 8.104629e-01 |
| 0.8730639 | -0.0564064952  | 4.982727e-01 | 0.9641086 | -0.0626079471  | 4.122317e-01  | 6.984455e-01 |
| 0.9949051 | -0.2347871214  | 3.147329e-03 | 0.2875687 | -0.0516550004  | 5.840317e-01  | 8.247616e-01 |
| 0.9236575 | -0.0760920978  | 4.366197e-01 | 0.9482489 | -0.0984801278  | 2.222203e-01  | 5.328026e-01 |
| 0.2019302 | -0.0256518111  | 8.222332e-01 | 0.9957784 | -0.0715012165  | 5.801368e-01  | 8.225914e-01 |
| 0.9275791 | -0.0705671860  | 6.061327e-01 | 0.9641086 | -0.1783873345  | 1.477051e-01  | 4.368450e-01 |
| 0.9867694 | 0.2207519695   | 5.123420e-01 | 0.9641086 | -0.5201204403  | 8.167613e-02  | 3.294921e-01 |
| 0.9275791 | -0.0617285799  | 5.388246e-01 | 0.9641086 | -0.1183170826  | 1.059039e-01  | 3.751228e-01 |
| 0.9696873 | 0.1166453156   | 4.439305e-01 | 0.9499322 | -0.2450446647  | 6.093420e-02  | 2.794946e-01 |
| 0.9949051 | 0.0157478242   | 9.000427e-01 | 0.9969722 | -0.1009232046  | 5.267373e-01  | 7.878622e-01 |
| 0.2019302 | 0.6743903587   | 3.056206e-01 | 0.9286466 | -0.6325752389  | 3.640366e-01  | 6.629639e-01 |
| 0.9949051 | 0.1999378573   | 7.964958e-01 | 0.9957784 | 3.8765904393   | 4.091761e-04  | 6.625290e-03 |
| 0.9949051 | 0.0204010151   | 8.434096e-01 | 0.9969722 | 0.1918503280   | 5.007073e-02  | 2.465984e-01 |
| 0.9949051 | -0.0017653123  | 9.811420e-01 | 0.9969722 | -0.0298330933  | 6.089178e-01  | 8.375303e-01 |
| 0.9981675 | -0.2011578550  | 5.762701e-02 | 0.7921508 | -0.0493977340  | 1.6112028e-01 | 8.384287e-01 |
| 0.9949051 | -0.0988047022  | 3.155073e-01 | 0.9300968 | -0.0838854350  | 4.671395e-01  | 7.502159e-01 |
| 0.8477725 | -0.2733692093  | 6.221910e-02 | 0.7921508 | 0.0106052635   | 4.910675e-01  | 9.835175e-01 |
| 0.8899481 | -0.1006782979  | 1.017165e-01 | 0.8015257 | -0.0609484051  | 1.905291e-01  | 4.925112e-01 |
| 0.9949051 | -0.0148360547  | 9.446832e-01 | 0.9969722 | 0.9972488498   | 8.153854e-06  | 7.408616e-04 |
| 0.9949051 | -0.0944667105  | 2.387611e-01 | 0.8975264 | -0.1136329338  | 1.478325e-01  | 4.368450e-01 |
| 0.9949051 | -0.1091961627  | 1.331353e-01 | 0.8166268 | -0.0719243867  | 4.552412e-01  | 7.382965e-01 |
| 0.9949051 | 0.3682792362   | 2.222799e-01 | 0.9430561 | 2.0310733675   | 1.203174e-05  | 8.413298e-04 |
| 0.7475613 | 0.0113657181   | 9.254052e-01 | 0.9969722 | 0.0587354656   | 5.984876e-01  | 8.312719e-01 |
| 0.7817234 | -0.1208527288  | 2.704205e-01 | 0.9106469 | -0.0184163626  | 8.504966e-01  | 9.481630e-01 |
| 0.9949051 | -0.0705121579  | 4.847074e-01 | 0.9641086 | -0.1216548061  | 3.195261e-01  | 6.336910e-01 |
| 0.9949051 | -0.1778049096  | 5.006845e-01 | 0.9641086 | -0.1359852238  | 6.652934e-01  | 8.575538e-01 |
| 0.9949051 | 0.0189309066   | 8.508635e-01 | 0.9969722 | -0.0227759038  | 7.969977e-01  | 9.183890e-01 |
| 0.9210048 | 0.1063529867   | 5.445699e-01 | 0.9641086 | -0.1979724747  | 1.238154e-01  | 4.002115e-01 |
| 0.9949051 | -0.0709246808  | 4.492904e-01 | 0.9517226 | -0.1471513415  | 1.815875e-01  | 8.845067e-01 |
| 0.9949051 | -0.2237642111  | 6.748337e-02 | 0.7921508 | -0.1295661368  | 2.230777e-01  | 5.328026e-01 |
| 0.9476053 | -0.0558436874  | 5.216052e-01 | 0.9641086 | -0.1234981080  | 2.500434e-01  | 5.599450e-01 |
| 0.9949051 | -0.3357429151  | 9.964986e-03 | 0.3705021 | 0.0409206179   | 8.117054e-01  | 9.252033e-01 |
| 0.9949051 | -0.2169957171  | 4.589469e-03 | 0.2875687 | -0.0797812481  | 3.586447e-01  | 6.629639e-01 |
| 0.9949051 | 0.1586509591   | 4.883374e-01 | 0.9641086 | -0.2193919947  | 2.227910e-01  | 5.328026e-01 |
| 0.9949051 | -0.0943042434  | 3.708266e-01 | 0.9430561 | -0.2408688117  | 1.059992e-01  | 3.751228e-01 |
| 0.9210048 | 0.0601675231   | 8.054935e-01 | 0.9957784 | -0.0490276706  | 8.249654e-01  | 9.358053e-01 |
| 0.5937207 | -0.0267780232  | 7.312375e-01 | 0.9733364 | 0.0455060570   | 5.435675e-01  | 7.934534e-01 |
| 0.8805172 | 0.0718399624   | 7.383261e-01 | 0.9767472 | 0.2917681893   | 5.451354e-02  | 2.619309e-01 |
| 0.9949051 | 0.3434590937   | 8.845777e-01 | 0.9733364 | -0.1184556210  | 8.867404e-01  | 9.645345e-01 |
| 0.9949051 | 0.2981108484   | 1.757511e-01 | 0.8526631 | 0.0439654579   | 8.571982e-01  | 9.513863e-01 |
| 0.9949051 | 0.0571130833   | 5.937127e-01 | 0.9641086 | -0.2305578399  | 1.516597e-02  | 1.106554e-01 |
| 0.8477725 | 0.0003624208   | 9.997294e-01 | 0.9997294 | -1.5685226570  | 1.485215e-01  | 4.377867e-01 |
| 0.9949051 | -0.1244714862  | 1.145231e-01 | 0.8166268 | -0.0772929650  | 3.716776e-01  | 6.676641e-01 |
| 0.8805172 | -0.0451309603  | 5.997952e-01 | 0.9641086 | 0.0950453122   | 1.072775e-01  | 3.780833e-01 |
| 0.9949051 | 0.1968325632   | 7.392237e-01 | 0.9767472 | 2.6764209288   | 3.327715e-05  | 1.456800e-03 |
| 0.8540650 | -0.1929411512  | 4.002649e-01 | 0.9430561 | -0.0286115894  | 8.642564e-01  | 9.515996e-01 |
| 0.9949051 | -0.1533141775  | 3.620111e-01 | 0.9430561 | -0.1625281731  | 4.078240e-01  | 6.952547e-01 |
| 0.8540650 | -0.0236084998  | 9.202906e-01 | 0.9969722 | -0.2738428406  | 3.276655e-01  | 6.412262e-01 |
| 0.9949051 | -0.0073602844  | 9.940101e-01 | 0.9997294 | -0.7747341159  | 4.411200e-01  | 7.251792e-01 |
| 0.9949051 | -0.1668883409  | 5.837867e-02 | 0.7921508 | -0.1782098032  | 8.696376e-02  | 3.348246e-01 |
| 0.9949051 | 0.0454373634   | 4.452305e-01 | 0.9499322 | -0.3191198355  | 1.498351e-01  | 4.408538e-01 |
| 0.9148164 | -0.0236013867  | 3.330814e-01 | 0.9366787 | 0.0284593001   | 9.064726e-01  | 9.713967e-01 |
| 0.9379096 | -0.1083139086  | 4.638374e-01 | 0.9641086 | -0.4438654850  | 2.457239e-03  | 2.547769e-02 |
| 0.9210048 | -0.0448124045  | 6.275802e-01 | 0.9689755 | 0.1396488816   | 1.014059e-01  | 3.676741e-01 |
| 0.8532963 | 0.3604779211   | 1.309954e-01 | 0.8166268 | -0.0751948147  | 6.986158e-01  | 8.762099e-01 |
| 0.8612982 | -0.1656169283  | 1.391589e-01 | 0.8166268 | -0.1460403193  | 2.128357e-01  | 5.215962e-01 |
| 0.9949051 | 0.0789107277   | 6.716015e-01 | 0.9717521 | -0.1261600611  | 4.935534e-01  | 7.643323e-01 |
| 0.8194410 | 0.3007561292   | 6.866954e-02 | 0.7921508 | -0.0565504162  | 7.118932e-01  | 8.762099e-01 |
| 0.9949051 | 0.0744447085   | 1.719302e-01 | 0.8467562 | -0.1699097656  | 5.401131e-02  | 2.612240e-01 |
| 0.9210048 | -0.1563707747  | 0.774277e-02 | 0.7921508 | -0.0316491780  | 7.648254e-01  | 8.933039e-01 |
| 0.9923046 | 0.0452635251   | 6.800351e-01 | 0.9733364 | -0.0640168612  | 4.981990e-01  | 7.643323e-01 |
| 0.9949051 | -0.1238358378  | 1.066386e-01 | 0.8123872 | -0.1701574769  | 6.225148e-02  | 2.813791e-01 |
| 0.8329325 | 0.8571783218   | 1.286548e-01 | 0.8166268 | 0.0304214740   | 9.248569e-01  | 9.835175e-01 |
| 0.8477725 | -0.6176779904  | 8.357461e-02 | 0.7921508 | -0.3874698223  | 2.364801e-01  | 5.464911e-01 |
| 0.9949051 | 0.2237967017   | 5.713789e-01 | 0.9641086 | 1.4565502039   | 1.721581e-03  | 1.901784e-02 |
| 0.9949051 | -0.1020816101  | 1.468795e-01 | 0.8189227 | -0.0585886889  | 5.931743e-01  | 8.274987e-01 |
| 0.9949051 | -0.1622164090  | 1.173612e-01 | 0.8166268 | -0.1483130077  | 1.506094e-01  | 4.410394e-01 |
| 0.8532963 | -0.2742910424  | 2.027059e-01 | 0.8526631 | 0.0619726787   | 8.006495e-01  | 9.207928e-01 |
| 0.9923046 | 0.0310885210   | 6.476351e-01 | 0.9689755 | -0.20505392293 | 2.652742e-03  | 2.703053e-02 |
| 0.8394240 | 1.3464559766   | 4.012210e-01 | 0.9430561 | -1.3023985047  | 1.218945e-01  | 3.995752e-01 |
| 0.9923046 | -0.2577015455  | 5.724644e-01 | 0.9641086 | 0.2098195898   | 6.643433e-01  | 8.572639e-01 |
| 0.9210048 | -0.3686881490  | 6.709734e-02 | 0.7921508 | -0.2972935100  | 1.542167e-01  | 4.468082e-01 |
| 0.9949051 | -0.1826327670  | 3.257746e-02 | 0.6526535 | -0.0900467211  | 4.307670e-01  | 7.171360e-01 |
| 0.7247177 | -0.0613527091  | 5.881922e-01 | 0.9641086 | -0.1911756767  | 1.197154e-01  | 3.995752e-01 |
| 0.9949051 | -0.2334211239  | 4.190045e-03 | 0.2875687 | -0.0259829780  | 7.592526e-01  | 8.905775e-01 |
| 0.9949051 | 0.0338604030   | 7.841218e-01 | 0.9955231 | 0.0613099574   | 5.068979e-01  | 7.730859e-01 |
| 0.9867694 | -0.0007351032  | 9.950232e-01 | 0.9997294 | -0.2717775828  | 9.704261e-03  | 7.855811e-02 |
| 0.9949051 | -0.1781174781  | 8.404338e-02 | 0.7921508 | -0.2028780462  | 1.154007e-01  | 3.942300e-01 |
| 0.9109219 | 0.2565067392   | 3.052217e-01 | 0.9286466 | 0.3088321741   | 3.691120e-01  | 6.675072e-01 |
| 0.8497626 | -0.1749044560  | 1.356522e-01 | 0.8166268 | -0.0090423384  | 9.302637e-01  | 9.835175e-01 |
| 0.8741974 | -0.03022281845 | 8.437044e-01 | 0.9969722 | -0.0460964803  | 7.175108e-01  | 8.762099e-01 |
| 0.9949051 | -0.0279095126  | 7.515578e-01 | 0.9826784 | 0.0452364384   | 7.196428e-01  | 8.762099e-01 |
| 0.9949051 | 0.3628003308   | 3.581543e-01 | 0.9430561 | -0.1194257230  | 5.907584e-01  | 8.264179e-01 |
| 0.9949051 | -0.3952912031  | 4.029832e-01 | 0.9430561 | -0.1           |               |              |

|           |               |              |           |                |              |              |
|-----------|---------------|--------------|-----------|----------------|--------------|--------------|
| 0.9949051 | -0.0353916714 | 6.942172e-01 | 0.9733364 | -0.0688632858  | 4.742480e-01 | 7.506714e-01 |
| 0.8394240 | -0.0049236219 | 9.506901e-01 | 0.9969722 | 0.0613471199   | 2.880165e-01 | 6.045220e-01 |
| 0.9949051 | -0.2014870786 | 5.080365e-01 | 0.9641086 | 0.7764991646   | 3.416068e-03 | 3.302505e-02 |
| 0.9949051 | 0.1682745563  | 4.097892e-01 | 0.9430561 | 0.7800312558   | 4.391094e-05 | 1.674282e-03 |
| 0.9653626 | -0.1530073089 | 1.580349e-01 | 0.8386867 | -0.0953910029  | 3.638522e-01 | 6.629639e-01 |
| 0.5133973 | -0.0417017240 | 8.237046e-01 | 0.9964090 | -0.0269606235  | 6.791565e-01 | 9.595226e-01 |
| 0.8487626 | 0.0354809694  | 8.576851e-01 | 0.9969722 | -0.2112662801  | 1.721314e-01 | 4.776041e-01 |
| 0.9379096 | -0.0274546881 | 7.809501e-01 | 0.9932650 | -0.0792120620  | 3.458028e-01 | 6.539822e-01 |
| 0.9210048 | 0.0273264335  | 6.738950e-01 | 0.9717521 | -0.0197553435  | 7.308062e-01 | 8.778587e-01 |
| 0.6918844 | 0.0301702648  | 8.266019e-01 | 0.9964090 | 0.0460504383   | 7.517455e-01 | 8.876755e-01 |
| 0.9949051 | -0.1669418303 | 1.540478e-01 | 0.8386867 | 0.1549166171   | 3.111848e-01 | 6.238252e-01 |
| 0.9981675 | 0.0087388307  | 9.414816e-01 | 0.9969722 | -0.1483367743  | 2.077621e-01 | 5.169997e-01 |
| 0.8487626 | -0.0150909373 | 9.583566e-01 | 0.9969722 | -0.0885041597  | 7.797263e-01 | 9.053594e-01 |
| 0.8194410 | -0.0914664764 | 4.802315e-01 | 0.9641086 | -0.2030710888  | 4.750334e-02 | 2.391031e-01 |
| 0.9379096 | -0.2095332181 | 8.067831e-02 | 0.7921508 | -0.0557846523  | 6.246323e-01 | 8.433108e-01 |
| 0.9379096 | 0.2851131564  | 2.391883e-01 | 0.8975264 | -0.0086059998  | 9.679419e-01 | 9.914275e-01 |
| 0.8103326 | -0.0641040458 | 4.576020e-01 | 0.9607204 | -0.0533420222  | 4.961010e-01 | 7.643323e-01 |
| 0.9949051 | -0.1078865556 | 4.427724e-01 | 0.9499322 | -0.1461901047  | 1.758186e-01 | 4.802300e-01 |
| 0.9949051 | 0.008770212   | 9.665244e-01 | 0.9969722 | -0.1384441513  | 5.154455e-01 | 7.810982e-01 |
| 0.8805172 | -0.0494990804 | 6.611232e-01 | 0.9689755 | -0.0081861340  | 9.483806e-01 | 9.835175e-01 |
| 0.9949051 | -0.1002806224 | 7.541191e-01 | 0.9839596 | 1.2335778535   | 4.613069e-04 | 7.131524e-03 |
| 0.9148215 | -0.2320205974 | 1.172877e-01 | 0.8166268 | -0.0214876898  | 8.620565e-01 | 9.515996e-01 |
| 0.9949051 | 0.2163629589  | 2.461904e-01 | 0.8975264 | -0.3390405790  | 1.460729e-01 | 4.367095e-01 |
| 0.9949051 | -0.1116667395 | 5.149556e-01 | 0.9641086 | -0.2608103867  | 9.388297e-02 | 3.558867e-01 |
| 0.9949051 | -0.0823359998 | 3.031149e-01 | 0.9286466 | -0.1724639173  | 3.493670e-02 | 2.004620e-01 |
| 0.7194638 | -0.1783746338 | 6.051857e-02 | 0.7921508 | -0.2600407726  | 2.585610e-02 | 1.660974e-01 |
| 0.9148164 | -0.0734787018 | 3.150255e-01 | 0.9300968 | -0.0372478119  | 4.897597e-01 | 7.621198e-01 |
| 0.9949051 | 0.0185259343  | 7.940539e-01 | 0.9957784 | -0.0334853481  | 6.441280e-01 | 6.512682e-01 |
| 0.8487626 | -0.2135487677 | 5.233313e-02 | 0.7921508 | -0.1524453229  | 1.241271e-01 | 4.002115e-01 |
| 0.9949051 | -0.1688452635 | 7.455131e-02 | 0.7921508 | -0.1442052241  | 1.187748e-01 | 3.995752e-01 |
| 0.9949051 | -0.3024257983 | 4.093273e-01 | 0.9430561 | -0.3954591274  | 2.751535e-01 | 5.881219e-01 |
| 0.9949051 | -0.0828755315 | 6.308213e-01 | 0.9689755 | -0.2206174420  | 2.394322e-01 | 5.481636e-01 |
| 0.9148164 | -0.1676695968 | 2.503239e-01 | 0.8975264 | 0.2440387608   | 1.596492e-01 | 4.560401e-01 |
| 0.9949051 | -0.0946407365 | 3.510529e-01 | 0.9430561 | -0.1121876032  | 2.614982e-01 | 5.723906e-01 |
| 0.9148164 | -0.0536439030 | 6.753515e-01 | 0.9717521 | -0.2766164181  | 3.809146e-02 | 2.110347e-01 |
| 0.9949051 | 0.6842950356  | 1.312026e-01 | 0.8166268 | -0.4882174860  | 1.882522e-01 | 4.902249e-01 |
| 0.2506875 | -0.0942090440 | 5.758955e-01 | 0.9641086 | -0.1545411955  | 3.312345e-01 | 6.431217e-01 |
| 0.9949051 | -0.1290573592 | 2.281179e-01 | 0.8836164 | -0.1104532261  | 3.712977e-01 | 6.676641e-01 |
| 0.2019302 | -0.0628041645 | 5.264716e-01 | 0.9641086 | -0.1434941697  | 9.885870e-02 | 3.627027e-01 |
| 0.4126320 | -0.1220471993 | 1.833969e-01 | 0.8526631 | 0.0053626105   | 9.729170e-01 | 9.922242e-01 |
| 0.8532963 | -0.0646167307 | 6.081490e-01 | 0.9641086 | -0.0749349120  | 5.653213e-01 | 8.104628e-01 |
| 0.9949051 | 0.0858464218  | 8.002326e-01 | 0.9957784 | -0.1185369950  | 5.714756e-01 | 8.131842e-01 |
| 0.9653626 | 0.0652496906  | 5.511484e-01 | 0.9641086 | -0.1468948084  | 9.911418e-02 | 3.627027e-01 |
| 0.9949051 | -0.0686714480 | 4.316740e-01 | 0.9482489 | -0.0924553927  | 2.351052e-01 | 5.459614e-01 |
| 0.8532963 | 0.0161573126  | 8.884295e-01 | 0.9969722 | -0.1865600159  | 2.781744e-01 | 5.897332e-01 |
| 0.8532963 | 0.0524258783  | 3.783228e-01 | 0.9430561 | -0.0924792137  | 1.756489e-01 | 4.802300e-01 |
| 0.9923046 | 0.0038689442  | 9.762982e-01 | 0.9969722 | -0.1555986151  | 1.851808e-01 | 4.889364e-01 |
| 0.8540650 | -0.0082747659 | 9.412388e-01 | 0.9969722 | -0.1777812616  | 6.576071e-03 | 5.757716e-02 |
| 0.9949051 | -0.1402120290 | 8.721382e-02 | 0.7921508 | -0.0461486536  | 5.584098e-01 | 8.039469e-01 |
| 0.3047548 | -0.0236967108 | 9.074279e-01 | 0.9969722 | 0.4517519963   | 3.063753e-02 | 1.847083e-01 |
| 0.5092568 | 0.1309685696  | 5.161019e-01 | 0.9641086 | 0.0730172295   | 6.927215e-01 | 8.739493e-01 |
| 0.9949051 | -0.1186574528 | 6.076315e-01 | 0.9641086 | 0.7318220384   | 2.980944e-03 | 2.960904e-02 |
| 0.9949051 | 0.0557120825  | 5.912088e-01 | 0.9641086 | 0.3224180996   | 6.120541e-04 | 8.822535e-03 |
| 0.9949051 | 0.0668839837  | 7.986824e-01 | 0.9957784 | 1.1359353520   | 2.334637e-04 | 4.599235e-03 |
| 0.9949051 | -0.0521450214 | 5.430000e-01 | 0.9641086 | -0.1738388159  | 1.790327e-01 | 4.809469e-01 |
| 0.9949051 | -0.3708216727 | 5.019002e-02 | 0.7909947 | -0.0908515016  | 6.565344e-01 | 8.556317e-01 |
| 0.9135088 | -0.2651360226 | 1.214241e-02 | 0.3879007 | -0.1365844887  | 2.547283e-01 | 5.659565e-01 |
| 0.9694325 | -0.1429204052 | 9.512019e-03 | 0.3705021 | -0.0485525585  | 3.984343e-01 | 6.512563e-01 |
| 0.6825121 | 0.1826963370  | 4.773889e-01 | 0.9641086 | 0.7941963756   | 4.962985e-03 | 4.547479e-02 |
| 0.9949051 | 0.1007161718  | 3.627482e-01 | 0.9430561 | -0.1321046527  | 1.475911e-01 | 4.368450e-01 |
| 0.9275791 | -0.0220089872 | 8.192254e-01 | 0.9957784 | -0.0988137231  | 2.988628e-01 | 6.175802e-01 |
| 0.9148164 | -0.0508678830 | 5.911678e-01 | 0.9641086 | -0.1178699187  | 1.897722e-01 | 4.922230e-01 |
| 0.9949051 | -0.1586612565 | 1.434487e-01 | 0.8166268 | -0.1205331345  | 1.755466e-01 | 4.802300e-01 |
| 0.9516289 | -0.1183184578 | 1.438143e-01 | 0.8166268 | 0.0387687306   | 5.255993e-01 | 7.873997e-01 |
| 0.9981675 | 0.0400363724  | 8.396140e-01 | 0.9969722 | 0.8140956687   | 3.089432e-05 | 1.451602e-03 |
| 0.9949051 | -0.1512152591 | 6.547069e-01 | 0.9689755 | 1.5772343886   | 6.798151e-04 | 9.243899e-03 |
| 0.9949051 | 0.0050339737  | 9.777208e-01 | 0.9969722 | 0.9098074911   | 2.046755e-04 | 4.398662e-03 |
| 0.9109219 | -0.4884787666 | 3.651312e-01 | 0.9430561 | -0.3729313304  | 4.730411e-01 | 7.506714e-01 |
| 0.9949051 | 0.0658113570  | 7.992037e-01 | 0.9957784 | -0.3598743258  | 2.086503e-02 | 1.409284e-01 |
| 0.9692638 | 1.0660831356  | 2.982467e-01 | 0.9286466 | -0.3653081503  | 3.738518e-01 | 6.695347e-01 |
| 0.9949051 | 0.0240749939  | 9.146403e-01 | 0.9969722 | 0.1249591096   | 5.865598e-01 | 8.264179e-01 |
| 0.9949051 | -0.0529145944 | 4.353356e-01 | 0.9482489 | -0.0496432076  | 5.444084e-01 | 7.934534e-01 |
| 0.9949051 | -0.1164188653 | 3.560829e-01 | 0.9430561 | 0.1232068431   | 4.382222e-01 | 7.234338e-01 |
| 0.9949051 | -0.1363794126 | 1.508736e-01 | 0.8333300 | 0.3883765498   | 9.963521e-03 | 7.957353e-02 |
| 0.9379096 | -0.0818015471 | 2.598188e-01 | 0.9038923 | -0.1576553210  | 1.569605e-02 | 1.131264e-01 |
| 0.5172057 | -0.2232219826 | 2.038184e-02 | 0.5125815 | -0.2404537372  | 6.124288e-02 | 2.794946e-01 |
| 0.7815947 | 0.0685126778  | 5.850807e-01 | 0.9641086 | -0.2244758659  | 1.270081e-01 | 4.046458e-01 |
| 0.9949051 | 0.0763171156  | 3.775705e-01 | 0.9430561 | -0.2421121883  | 3.625164e-02 | 2.050213e-01 |
| 0.9949051 | -0.2030108643 | 1.070917e-02 | 0.3723011 | -0.1613678198  | 8.308924e-02 | 3.328401e-01 |
| 0.9949051 | -0.1154633334 | 2.714804e-01 | 0.9110414 | 0.2453846123   | 6.12407e-02  | 2.881189e-01 |
| 0.9379096 | 0.1163258508  | 3.720837e-01 | 0.9430561 | -0.0936999826  | 3.314455e-01 | 6.431217e-01 |
| 0.9949051 | 0.0950039547  | 1.586241e-01 | 0.8386867 | -0.1890362083  | 3.108778e-03 | 3.062147e-02 |
| 0.9949051 | 0.3358673658  | 6.583880e-01 | 0.9689755 | 3.8047008914   | 6.209903e-06 | 6.672823e-04 |
| 0.9949051 | 0.1523069416  | 5.801461e-01 | 0.9641086 | 0.6155465581   | 4.478689e-02 | 2.348175e-01 |
| 0.9949051 | -0.1714226144 | 5.458008e-02 | 0.7921508 | -0.0853214559  | 4.056432e-01 | 6.952547e-01 |
| 0.9210048 | 0.1066003489  | 5.012477e-01 | 0.9641086 | 0.6679694842   | 8.226262e-04 | 1.198400e-02 |
| 0.9949051 | 0.1015228845  | 4.015292e-01 | 0.9430561 | -0.0393162057  | 7.015193e-01 | 8.762099e-01 |
| 0.7251512 | 0.0105029094  | 8.747852e-01 | 0.9969722 | -0.0586791685  | 4.955003e-01 | 7.643323e-01 |
| 0.9949051 | -0.1323080867 | 9.430683e-02 | 0.7921508 | 0.0286553991   | 6.053875e-01 | 8.359439e-01 |
| 0.9949051 | 0.2087993208  | 4.531878e-01 | 0.9579510 | -0.0196152047  | 9.479147e-01 | 9.835175e-01 |
| 0.8540650 | -0.0743333443 | 3.329795e-01 | 0.9366787 | -0.1279295917  | 4.845924e-02 | 3.328479e-01 |
| 0.9949051 | -0.0904305134 | 2.424821e-01 | 0.8975264 | -0.0737643392  | 2.222890e-01 | 5.328026e-01 |
| 0.9949051 | 0.0471525459  | 8.703365e-01 | 0.9969722 | 1.4573242299   | 6.665362e-05 | 2.058028e-03 |
| 0.9949051 | -0.2979265865 | 3.227821e-03 | 0.2875687 | -0.2237307116  | 6.394452e-02 | 2.838570e-01 |
| 0.9949051 | -0.2247050710 | 5.740747e-01 | 0.9641086 | 2.0755942845   | 4.840756e-03 | 4.470136e-02 |
| 0.9949051 | 0.4523059171  | 5.162952e-01 | 0.9641086 | 2.7025323304   | 6.898401e-04 | 9.265807e-03 |
| 0.9949051 | -0.1352644510 | 1.576401e-01 | 0.8386867 | -0.0899485109  | 2.999647e-01 | 6.187753e-01 |
| 0.8598556 | -0.0444431657 | 6.547765e-01 | 0.9689755 | 0.0199555894   | 8.192996e-01 | 9.302711e-01 |
| 0.9949051 | -0.0026337893 | 9.783302e-01 | 0.9969722 | -0.2245521383  | 2.306685e-02 | 1.506355e-01 |
| 0.9696873 | -0.0694748957 | 4.298352e-01 | 0.9478644 | 0.0412736500   | 7.266548e-01 | 8.773616e-01 |
| 0.7475613 | -0.0272992229 | 8.693784e-01 | 0.9969722 | -0.2433335208  | 1.470820e-01 | 4.368450e-01 |
| 0.8194410 | -0.0395849059 | 7.303726e-01 | 0.9733364 | -0.0083889356  | 9.457852e-01 | 9.835175e-01 |
| 0.8394240 | 0.2834851096  | 5.879702e-01 | 0.9641086 | 2.2409703776   | 2.172294e-05 | 1.126414e-03 |
| 0.8477725 | -0.0606043191 | 4.449915e-01 | 0.9499322 | -0.24635327813 | 3.193197e-04 | 5.718726e-03 |
| 0.8329325 | -0.0228711335 | 7.086020e-01 | 0.9733364 | -0.0544236382  | 4.329273e-01 | 7.187080e-01 |
| 0.8477725 | -0.2572937232 | 9.653674e-02 | 0.7921508 | -0.15406       |              |              |



|           |               |              |           |                |              |              |
|-----------|---------------|--------------|-----------|----------------|--------------|--------------|
| 0.9949051 | -0.1225288385 | 4.085784e-01 | 0.9430561 | -0.0547518048  | 7.174900e-01 | 8.762099e-01 |
| 0.9949051 | -0.0142041025 | 9.302218e-01 | 0.9969722 | -0.0876176026  | 5.238388e-01 | 7.867567e-01 |
| 0.8194410 | 0.0790354016  | 6.423345e-01 | 0.9689755 | -0.0541360552  | 6.906595e-01 | 8.721790e-01 |
| 0.8194410 | 0.0177762668  | 8.664713e-01 | 0.9969722 | -0.0313234953  | 7.215281e-01 | 8.762099e-01 |
| 0.8088570 | -0.0713657036 | 4.963552e-01 | 0.9641086 | -0.0692512631  | 5.686531e-01 | 8.127545e-01 |
| 0.9148164 | -0.0634330526 | 6.708699e-01 | 0.9717521 | -0.1063875589  | 4.816479e-01 | 7.570582e-01 |
| 0.9257199 | 0.0315331685  | 7.779451e-01 | 0.9932650 | -0.2428074887  | 1.128757e-02 | 8.902485e-02 |
| 0.7815947 | 0.0513873455  | 6.345614e-01 | 0.9689755 | -0.1567457971  | 2.027266e-01 | 5.098358e-01 |
| 0.9949051 | -0.7375804405 | 7.523072e-02 | 0.7921508 | 2.0197890021   | 2.149205e-03 | 2.268179e-02 |
| 0.9949051 | 0.2170843036  | 5.491599e-01 | 0.9641086 | 0.1494612143   | 6.873801e-01 | 8.698964e-01 |
| 0.9949051 | -0.0040345148 | 9.815230e-01 | 0.9969722 | -0.1773579558  | 2.286415e-01 | 5.383552e-01 |
| 0.9949051 | 0.0785085252  | 8.028674e-01 | 0.9957784 | -0.3338507544  | 6.015881e-02 | 2.791213e-01 |
| 0.9949051 | -0.1756470408 | 2.811397e-01 | 0.9154467 | -0.1734429023  | 2.373245e-01 | 5.468179e-01 |
| 0.9949051 | -0.1340073464 | 1.286838e-01 | 0.8166268 | 0.0414532229   | 6.847359e-01 | 8.684097e-01 |
| 0.8532963 | -0.1247439884 | 1.291658e-01 | 0.8166268 | -0.2010774127  | 6.269007e-02 | 2.813791e-01 |
| 0.9949051 | -0.1719728043 | 2.203726e-01 | 0.8800012 | 0.0604060401   | 6.212172e-01 | 8.433108e-01 |
| 0.9949051 | -0.0780479729 | 6.158645e-01 | 0.9641086 | -0.0985695952  | 5.531576e-01 | 7.993060e-01 |
| 0.9949051 | -0.0506650070 | 8.692402e-01 | 0.9969722 | 0.3873407986   | 1.241728e-01 | 4.002115e-01 |
| 0.8805172 | -0.2027867289 | 5.840679e-03 | 0.3216097 | -0.0342407459  | 7.151523e-01 | 8.762099e-01 |
| 0.9949051 | 0.1323411476  | 8.194963e-01 | 0.9957784 | 2.6413533684   | 1.240218e-05 | 8.413298e-04 |
| 0.8805172 | -0.0065849245 | 9.676899e-01 | 0.9969722 | -0.0712696609  | 5.233321e-01 | 7.867567e-01 |
| 0.9949051 | -0.0941007015 | 6.905361e-01 | 0.9733364 | 0.2467706187   | 3.067687e-01 | 6.214128e-01 |
| 0.9981675 | -0.2914006624 | 4.061180e-02 | 0.6857593 | -0.2612565670  | 6.419772e-02 | 2.838570e-01 |
| 0.7475613 | 0.0956162278  | 6.498295e-01 | 0.9689755 | -0.0427277828  | 7.341275e-01 | 8.794980e-01 |
| 0.9949051 | 0.3203650771  | 4.764825e-01 | 0.9641086 | 2.3029789396   | 5.861794e-09 | 6.928640e-06 |
| 0.9949051 | -0.0988387423 | 5.635690e-01 | 0.9876268 | 0.1991411266   | 5.599180e-01 | 8.051376e-01 |
| 0.9949051 | -0.0643230987 | 5.730882e-01 | 0.9641086 | 0.0800926731   | 3.921747e-01 | 6.796928e-01 |
| 0.9148164 | -0.1039438665 | 2.773454e-01 | 0.9110414 | -0.0800773514  | 2.891260e-01 | 6.048618e-01 |
| 0.9949051 | 0.6871388996  | 3.184065e-01 | 0.9300968 | -0.3805004477  | 2.613797e-01 | 5.723906e-01 |
| 0.9694325 | -0.1213890267 | 3.255280e-02 | 0.6526535 | -0.0065118801  | 9.375558e-01 | 9.835175e-01 |
| 0.8539066 | 0.3068646557  | 3.374639e-01 | 0.9366787 | -0.1040348468  | 3.889655e-01 | 6.766173e-01 |
| 0.2019302 | 0.2940746979  | 1.78643e-01  | 0.8526631 | -0.1489443924  | 4.880565e-01 | 7.621198e-01 |
| 0.9210048 | -0.1118625958 | 5.639571e-01 | 0.9641086 | -0.0720674290  | 6.292725e-01 | 8.433108e-01 |
| 0.9949051 | 0.0657647696  | 9.216326e-01 | 0.9969722 | 2.7483659395   | 2.102760e-03 | 2.239156e-02 |
| 0.9949051 | -0.1775887151 | 2.642611e-02 | 0.5893521 | -0.0927948567  | 3.710999e-01 | 6.676641e-01 |
| 0.6504978 | -0.0320860076 | 8.841464e-01 | 0.9969722 | -0.3204337737  | 2.222303e-02 | 1.467465e-01 |
| 0.6504978 | 0.0429182600  | 7.097572e-01 | 0.9733364 | -0.1414453250  | 3.820763e-02 | 2.110347e-01 |
| 0.8539066 | -0.1278429958 | 7.122564e-01 | 0.9733364 | -0.58111145971 | 4.241613e-02 | 2.277429e-01 |
| 0.9923046 | -0.1632314533 | 2.422365e-01 | 0.8975264 | -0.2835327949  | 4.204137e-03 | 3.943881e-02 |
| 0.9149215 | 0.0839085528  | 5.214914e-01 | 0.9641086 | -0.2836526471  | 1.692853e-02 | 1.191043e-01 |
| 0.9949051 | -0.0864214403 | 4.977159e-01 | 0.9641086 | -0.0516304583  | 6.007390e-01 | 8.314678e-01 |
| 0.5133973 | -0.0180678485 | 8.843341e-01 | 0.9969722 | 0.0118827035   | 9.310031e-01 | 9.835175e-01 |
| 0.8194410 | -0.2541184474 | 3.538291e-02 | 0.6690430 | -0.0789326862  | 3.151753e-01 | 6.303507e-01 |
| 0.9917395 | -0.0481555587 | 6.082107e-01 | 0.9641086 | -0.0820356996  | 4.796463e-01 | 7.551927e-01 |
| 0.9923046 | 0.5558766523  | 2.772826e-01 | 0.9110414 | -0.5593020668  | 4.487223e-02 | 2.348175e-01 |
| 0.9949051 | -0.0659364398 | 7.261546e-01 | 0.9733364 | -0.3143001252  | 1.077658e-01 | 3.780833e-01 |
| 0.8497626 | 0.0103366110  | 8.826035e-01 | 0.9969722 | 0.0111287358   | 8.555526e-01 | 9.513294e-01 |
| 0.9949051 | -0.0858379119 | 7.395844e-01 | 0.9767472 | -0.4922213289  | 3.165025e-02 | 1.879929e-01 |
| 0.9949051 | -0.2310653489 | 1.401243e-01 | 0.8166268 | -0.2916163479  | 8.942027e-02 | 3.627027e-01 |
| 0.9949051 | 3.2462895331  | 2.868685e-01 | 0.9286466 | -2.4155230034  | 2.126030e-01 | 5.215962e-01 |
| 0.9949051 | -0.1430057321 | 1.833138e-01 | 0.8526631 | -0.1468707212  | 2.570040e-01 | 5.688741e-01 |
| 0.8394240 | -0.0169049874 | 9.080433e-01 | 0.9969722 | -0.1844933790  | 6.949266e-02 | 2.976099e-01 |
| 0.9949051 | 0.0680768110  | 6.742662e-01 | 0.9717521 | -0.3967273666  | 6.674080e-02 | 1.699335e-01 |
| 0.7251512 | 0.0002033438  | 9.984458e-01 | 0.9997294 | -0.0425612757  | 6.410753e-01 | 8.512682e-01 |
| 0.9949051 | 0.0081902289  | 9.872120e-01 | 0.9981904 | 2.4791612486   | 2.295697e-05 | 1.130631e-03 |
| 0.2019302 | 0.0247791792  | 9.771579e-01 | 0.9969722 | 0.4628534203   | 5.315116e-01 | 7.882615e-01 |
| 0.8741974 | 0.0388419335  | 7.503838e-01 | 0.9823061 | -0.0124594966  | 9.048471e-01 | 9.710339e-01 |
| 0.8805172 | -0.1159762191 | 1.629743e-01 | 0.8441531 | 0.1868342990   | 4.532936e-02 | 2.354314e-01 |
| 0.8497626 | 0.0097792136  | 9.277637e-01 | 0.9969722 | -0.1970156347  | 1.822219e-01 | 4.851043e-01 |
| 0.8805172 | 0.4157919446  | 1.961499e-01 | 0.8526631 | 0.7328063274   | 6.640598e-05 | 2.058029e-03 |
| 0.9949051 | 0.0370296659  | 8.193978e-01 | 0.9957784 | 0.1778195959   | 3.771280e-01 | 6.707992e-01 |
| 0.9949051 | -0.1047320027 | 5.902492e-01 | 0.9641086 | -0.1393488593  | 5.108056e-01 | 7.770557e-01 |
| 0.9949051 | 0.0775269050  | 8.926331e-01 | 0.9969722 | 1.8420932388   | 3.465006e-04 | 6.112892e-03 |
| 0.5133973 | 0.0070597198  | 9.484321e-01 | 0.9969722 | -0.0413190510  | 6.633760e-01 | 8.572639e-01 |
| 0.9949051 | -0.4998431371 | 1.817754e-02 | 0.4996710 | -0.1671248117  | 1.585889e-01 | 7.414889e-01 |
| 0.9949051 | -0.1334160991 | 9.296381e-02 | 0.7921508 | -0.1078690829  | 3.055929e-01 | 6.214128e-01 |
| 0.9949051 | -0.1614665983 | 9.041872e-02 | 0.7921508 | -0.0594816667  | 5.368447e-01 | 7.882615e-01 |
| 0.9949051 | -0.1387972893 | 8.637255e-01 | 0.9969722 | 3.9711205482   | 2.075753e-03 | 2.230491e-02 |
| 0.9949051 | 0.1399743928  | 5.890982e-01 | 0.9641086 | 0.6652774311   | 2.382820e-02 | 1.547524e-01 |
| 0.9949051 | -0.0203344963 | 8.292978e-01 | 0.9964090 | -0.0369577735  | 6.365105e-01 | 8.493805e-01 |
| 0.9949051 | -0.2088340003 | 7.650811e-01 | 0.9876268 | -0.6961598659  | 3.065022e-01 | 6.214128e-01 |
| 0.9210048 | -0.2498437447 | 2.853844e-02 | 0.6133169 | -0.0215968517  | 8.364163e-01 | 9.420896e-01 |
| 0.9949051 | -0.0544582295 | 5.643468e-01 | 0.9641086 | -0.2257539208  | 7.136921e-02 | 3.034475e-01 |
| 0.8805172 | -0.0521052409 | 6.047563e-01 | 0.9641086 | -0.1436704279  | 2.149517e-01 | 5.227838e-01 |
| 0.5133973 | 0.6235366294  | 3.122988e-01 | 0.9300968 | -0.1449958162  | 8.154100e-01 | 9.276368e-01 |
| 0.9476053 | -0.8786633749 | 1.437155e-01 | 0.8166268 | 1.2293388566   | 7.935505e-01 | 6.707992e-01 |
| 0.9949051 | 0.1135571211  | 7.989812e-01 | 0.9957784 | 1.8277455327   | 6.272493e-05 | 2.058028e-03 |
| 0.8805172 | -0.0048704423 | 9.651981e-01 | 0.9969722 | -0.0111119753  | 8.959442e-01 | 9.686740e-01 |
| 0.9949051 | 0.0229338744  | 8.179377e-01 | 0.9957784 | -0.0203563836  | 7.837202e-01 | 9.081934e-01 |
| 0.9949051 | 0.1681946618  | 3.699866e-01 | 0.9430561 | -0.0271217483  | 9.012719e-01 | 9.710339e-01 |
| 0.9949051 | -0.2057026251 | 7.346768e-02 | 0.7921508 | -0.2540779130  | 2.843736e-02 | 1.785439e-01 |
| 0.9949051 | -0.0630593428 | 5.181189e-01 | 0.9641086 | -0.2007433944  | 2.221356e-02 | 1.467465e-01 |
| 0.9949051 | -0.1189746677 | 2.642729e-01 | 0.8092411 | -0.0465752117  | 7.053479e-01 | 8.762099e-01 |
| 0.9949051 | 0.5304671313  | 3.939172e-01 | 0.9430561 | 0.4497562236   | 4.741299e-01 | 7.506714e-01 |
| 0.2019302 | 0.1100266873  | 8.841788e-01 | 0.9733364 | -0.0017972413  | 9.925966e-01 | 9.950155e-01 |
| 0.8497626 | 0.0803529763  | 2.995541e-01 | 0.9286466 | 0.0727365398   | 4.657258e-01 | 7.489631e-01 |
| 0.8210171 | -0.1041428445 | 1.869861e-01 | 0.8526631 | -0.0574623149  | 6.285416e-01 | 8.433108e-01 |
| 0.9949051 | -0.1200733990 | 2.946337e-01 | 0.9286466 | -0.1850249802  | 1.242620e-01 | 4.002115e-01 |
| 0.9949051 | -0.0464163402 | 8.214496e-01 | 0.9957784 | -0.3284301532  | 1.483087e-01 | 4.367095e-01 |
| 0.8730639 | 0.1350759265  | 6.158245e-01 | 0.9641086 | -0.3268455907  | 2.451177e-01 | 5.554637e-01 |
| 0.9949051 | 0.0629082413  | 5.770311e-01 | 0.9641086 | -0.2405820834  | 8.057905e-02 | 3.293325e-01 |
| 0.9275791 | -0.4212893560 | 8.796665e-02 | 0.7921508 | -0.3036155712  | 2.121613e-01 | 5.215962e-01 |
| 0.8598556 | -0.2016582208 | 9.717586e-02 | 0.7921508 | -0.1690813258  | 1.328028e-01 | 4.152722e-01 |
| 0.9949051 | -0.0788216453 | 4.050993e-01 | 0.9430561 | -0.0423764998  | 6.257250e-01 | 8.433108e-01 |
| 0.9210048 | -0.0920662987 | 5.528385e-01 | 0.9641086 | 0.1192021789   | 5.934655e-01 | 8.274967e-01 |
| 0.9949051 | 0.0794744065  | 6.658844e-01 | 0.9717521 | -0.4593480648  | 3.320794e-02 | 1.952575e-01 |
| 0.9135088 | 0.0578227160  | 7.815029e-01 | 0.9932650 | -0.19703771652 | 9.468793e-02 | 3.558676e-01 |
| 0.9949051 | -0.0683898058 | 4.102577e-01 | 0.9430561 | -0.1009000991  | 2.683658e-01 | 5.832415e-01 |
| 0.9867694 | -0.1752713659 | 1.856815e-01 | 0.8526631 | -0.1070720489  | 5.459699e-01 | 7.942706e-01 |
| 0.8532963 | -0.0021950240 | 9.828615e-01 | 0.9969722 | -0.0961851222  | 2.024366e-01 | 5.098358e-01 |
| 0.8805172 | -0.0290548410 | 7.236994e-01 | 0.9733364 | -0.1190475404  | 1.302311e-01 | 4.093966e-01 |
| 0.9696873 | -0.2733043823 | 1.257487e-01 | 0.8166268 | -0.1933673535  | 3.623120e-01 | 6.629639e-01 |
| 0.9949051 | -0.1022643318 | 3.194749e-01 | 0.9300968 | -0.2011675637  | 1.382914e-01 | 4.217184e-01 |
| 0.9949051 | 0.0137359573  | 9.021467e-01 | 0.9969722 | -0.1023162115  | 2.499895e-01 | 5.599450e-01 |
| 0.9949051 | 0.0610523105  | 8.979459e-01 | 0.9969722 | -0.4330615596  | 1.342438e-01 | 4.186707e-01 |
| 0.9515733 | 0.0889506483  | 6.690105e-01 | 0.9717521 | -0.234         |              |              |

|           |               |              |           |               |              |              |
|-----------|---------------|--------------|-----------|---------------|--------------|--------------|
| 0.9949051 | -0.2984706035 | 6.091587e-01 | 0.9641086 | -2.4277404321 | 2.866003e-04 | 5.377167e-03 |
| 0.8532963 | -0.0954207464 | 3.660826e-01 | 0.9430561 | -0.1434483614 | 2.509722e-01 | 5.601071e-01 |
| 0.9949051 | -0.1929598206 | 2.898413e-03 | 0.2875687 | -0.0314134658 | 7.118098e-01 | 8.762099e-01 |
| 0.6504978 | -0.7856715639 | 7.847352e-02 | 0.7921508 | 0.3308966202  | 3.818718e-01 | 6.715871e-01 |
| 0.9210048 | 0.3684292419  | 6.254343e-01 | 0.9689755 | 0.0368725922  | 9.809803e-01 | 9.906899e-01 |
| 0.8805172 | -0.0038668529 | 9.704448e-01 | 0.9969722 | -0.0896010227 | 3.497288e-01 | 6.564148e-01 |
| 0.8487626 | -0.0349883571 | 7.746770e-01 | 0.9920566 | -0.0049377194 | 9.704461e-01 | 9.915358e-01 |
| 0.9949051 | -0.6821997565 | 1.075818e-01 | 0.8123872 | 0.0196471611  | 9.653329e-01 | 9.911825e-01 |
| 0.8612982 | 0.5941188128  | 1.960021e-01 | 0.8526631 | 0.0029457188  | 9.953516e-01 | 9.961944e-01 |
| 0.9949051 | 0.0031669708  | 9.769391e-01 | 0.9969722 | -0.1178742528 | 1.882928e-01 | 4.902249e-01 |
| 0.8194410 | 1.1011967286  | 2.258198e-01 | 0.8836164 | -0.1287745187 | 7.696566e-01 | 6.980594e-01 |
| 0.8394240 | 0.2207127991  | 5.032746e-01 | 0.9641086 | 0.6864388601  | 4.934210e-02 | 2.440266e-01 |
| 0.8805172 | 4.3308168736  | 2.990816e-01 | 0.8286466 | -0.5645640865 | 7.278220e-01 | 8.773616e-01 |
| 0.9998558 | 1.0788256873  | 1.345406e-01 | 0.8166268 | 2.0235074005  | 3.566208e-03 | 3.399401e-02 |
| 0.9949051 | 0.0281343420  | 9.235712e-01 | 0.9969722 | 1.4046503817  | 4.836725e-04 | 7.329498e-03 |
| 0.9949051 | -0.1380471783 | 5.479635e-01 | 0.9641086 | -0.4580355814 | 8.383482e-02 | 3.328497e-01 |
| 0.8997252 | -0.1633012356 | 3.856441e-01 | 0.9430561 | 0.2334346453  | 1.083946e-01 | 3.790604e-01 |
| 0.9949051 | -0.1367165477 | 8.766476e-02 | 0.7921508 | -0.0777509944 | 4.882578e-01 | 7.621198e-01 |
| 0.5297647 | 0.2702556596  | 2.662687e-01 | 0.9096231 | -0.2157082642 | 3.656589e-01 | 6.639152e-01 |
| 0.9949051 | 0.8620744303  | 4.430560e-01 | 0.9499322 | 6.2076958197  | 1.568920e-03 | 1.800451e-02 |
| 0.9109219 | 0.1170133185  | 4.881478e-01 | 0.9641086 | -0.2788171713 | 6.883308e-02 | 3.348246e-01 |
| 0.9432280 | -0.1147083751 | 5.401938e-01 | 0.9641086 | 0.0899621191  | 6.279334e-01 | 8.433108e-01 |
| 0.9949051 | 0.3162347081  | 2.161429e-01 | 0.8800012 | 0.9878934217  | 9.391021e-05 | 2.499111e-03 |
| 0.9949051 | -0.0699297456 | 4.330079e-01 | 0.9482489 | 0.0055463499  | 9.512790e-01 | 9.854617e-01 |
| 0.9949051 | -0.0106661932 | 9.143757e-01 | 0.9969722 | -0.0785763656 | 3.109195e-01 | 6.238252e-01 |
| 0.5172307 | -0.0768576578 | 8.089373e-01 | 0.9957784 | 0.0034239190  | 9.899525e-01 | 9.950155e-01 |
| 0.9493730 | -0.1740685410 | 6.964578e-01 | 0.9733364 | -0.0795524820 | 1.476737e-02 | 1.090940e-01 |
| 0.8497626 | 0.0824998082  | 6.436543e-01 | 0.9689755 | -0.1244996851 | 5.583700e-01 | 6.039469e-01 |
| 0.9949051 | -0.0362861629 | 7.550343e-01 | 0.9839586 | -0.1080282124 | 4.154329e-01 | 7.014880e-01 |
| 0.8394240 | 0.5263507316  | 4.404303e-01 | 0.9482489 | 0.1316957881  | 8.079502e-01 | 9.227025e-01 |
| 0.8394240 | -0.6285949426 | 4.938750e-02 | 0.7888653 | -0.3499325752 | 1.920520e-01 | 4.928717e-01 |
| 0.9949051 | -0.1268840144 | 3.337402e-01 | 0.9366787 | 0.1495232688  | 2.274876e-01 | 5.378807e-01 |
| 0.8540650 | 0.2493598452  | 4.185942e-01 | 0.9430561 | -0.4817600803 | 1.409337e-01 | 4.313059e-01 |
| 0.9949051 | 0.0481601032  | 9.312230e-01 | 0.9969722 | 2.4088479820  | 4.541317e-04 | 7.131524e-03 |
| 0.9949051 | -0.1509563551 | 1.829805e-01 | 0.8526631 | -0.1361455577 | 9.425651e-02 | 3.558867e-01 |
| 0.9949051 | 0.0239805477  | 9.561618e-01 | 0.9969722 | 0.8651949890  | 3.204416e-01 | 6.344422e-01 |
| 0.8394240 | -1.3053963953 | 1.198793e-01 | 0.8166268 | 1.6490058513  | 3.403477e-01 | 6.522734e-01 |
| 0.9949051 | -0.0138411155 | 9.517057e-01 | 0.9969722 | 0.1280723939  | 7.281656e-01 | 8.773616e-01 |
| 0.9210048 | -0.1087177058 | 8.868625e-01 | 0.9969722 | -1.8965701588 | 9.070314e-03 | 7.497281e-02 |
| 0.9949051 | 0.0380564015  | 8.025276e-01 | 0.9957784 | -0.0835101733 | 5.326472e-01 | 7.882615e-01 |
| 0.9210048 | 0.1245717112  | 5.551309e-01 | 0.9641086 | -0.1854970566 | 3.567310e-01 | 6.629639e-01 |
| 0.9949051 | 0.2307492611  | 4.972735e-01 | 0.9641086 | 0.3628685027  | 2.580357e-01 | 5.700900e-01 |
| 0.9949051 | -0.2610015891 | 3.977200e-02 | 0.6813116 | -0.0215872322 | 6.840823e-01 | 9.640195e-01 |
| 0.8497626 | -0.0951495447 | 3.926469e-01 | 0.9430561 | 0.0986025689  | 2.943132e-01 | 6.124616e-01 |
| 0.9949051 | -0.0979804905 | 6.133687e-01 | 0.9641086 | 0.1165243704  | 4.526058e-01 | 7.363525e-01 |
| 0.9949051 | 0.1991057082  | 7.233593e-01 | 0.9733364 | 2.2987968583  | 6.964560e-05 | 2.058028e-03 |
| 0.9715057 | 0.4119065676  | 1.865247e-01 | 0.8526631 | -0.0494438596 | 8.707230e-01 | 9.529580e-01 |
| 0.9715057 | 0.0840724086  | 3.663417e-01 | 0.9430561 | 0.0953619524  | 2.341451e-01 | 5.448022e-01 |
| 0.8194410 | 0.1031901388  | 5.368797e-01 | 0.9641086 | 0.0307236008  | 8.511006e-01 | 9.481630e-01 |
| 0.9949051 | 0.0592595153  | 7.576233e-01 | 0.9851603 | -0.1838086787 | 2.904086e-01 | 6.064469e-01 |
| 0.9949051 | 0.0281745598  | 9.211981e-01 | 0.9969722 | 0.1017303420  | 7.344032e-01 | 8.794989e-01 |
| 0.8394240 | -0.2955516208 | 7.225343e-01 | 0.9733364 | -0.4737292702 | 3.256011e-01 | 6.382430e-01 |
| 0.8532963 | -0.0249002729 | 8.601061e-01 | 0.9969722 | 0.0603632152  | 6.585743e-01 | 8.563248e-01 |
| 0.9949051 | 0.1516665072  | 3.458876e-01 | 0.9398602 | -0.0030917285 | 9.858100e-01 | 9.950155e-01 |
| 0.9949051 | 0.0768636987  | 6.185092e-01 | 0.9641086 | -0.1203493542 | 3.525701e-01 | 6.604404e-01 |
| 0.9210048 | 0.0244676080  | 9.260954e-01 | 0.9969722 | 0.0065913779  | 9.829589e-01 | 9.950155e-01 |
| 0.9981675 | -0.0052162261 | 9.516926e-01 | 0.9969722 | -0.0833041511 | 3.495482e-01 | 6.564148e-01 |
| 0.9949051 | -0.0718238745 | 3.929502e-01 | 0.9430561 | -0.0677700006 | 4.866651e-01 | 7.621198e-01 |
| 0.9210048 | 0.3435337665  | 2.689340e-01 | 0.9106489 | 0.2798489213  | 2.606325e-01 | 5.723906e-01 |
| 0.8394240 | -0.0895941342 | 1.370353e-01 | 0.8166268 | -0.0547787557 | 2.719991e-01 | 5.856155e-01 |
| 0.8194410 | -0.2766659006 | 5.220341e-03 | 0.3085222 | -0.1950198687 | 1.119020e-01 | 3.878831e-01 |
| 0.9949051 | -0.1827886214 | 4.736902e-01 | 0.9641086 | -0.4897319349 | 8.561527e-02 | 3.339128e-01 |
| 0.5471102 | 0.0624466522  | 5.192921e-01 | 0.9641086 | -0.0823716998 | 5.140939e-01 | 7.800501e-01 |
| 0.9148184 | -0.0803625240 | 5.896566e-01 | 0.9641086 | -0.0863613178 | 5.707695e-01 | 8.131842e-01 |
| 0.9949051 | 0.1406104377  | 4.574989e-01 | 0.9607204 | -0.4336175580 | 7.514541e-02 | 3.172210e-01 |
| 0.8088570 | -0.3642588997 | 2.548955e-01 | 0.9016579 | -0.1419071470 | 6.386761e-01 | 8.493805e-01 |
| 0.9949051 | 0.0850939997  | 7.306178e-01 | 0.9733364 | -0.2045933053 | 0.052099e-01 | 6.952547e-01 |
| 0.8194410 | 0.0438924478  | 7.711145e-01 | 0.9919874 | -0.1801291961 | 2.684831e-01 | 5.832415e-01 |
| 0.8741974 | 0.0660691225  | 6.187484e-01 | 0.9641086 | 0.0501508636  | 6.435408e-01 | 8.512682e-01 |
| 0.8394240 | -0.0299244212 | 6.957404e-01 | 0.9733364 | -0.2315736590 | 1.512719e-02 | 1.106554e-01 |
| 0.9949051 | -0.0165875950 | 9.670545e-01 | 0.9969722 | 1.8393864285  | 4.002388e-05 | 1.613603e-03 |
| 0.9949051 | 0.0502294357  | 8.115428e-01 | 0.9957784 | -0.2578781367 | 2.501277e-01 | 5.599450e-01 |
| 0.7685693 | 0.2288429661  | 6.870524e-01 | 0.9733364 | -0.5337894267 | 1.184209e-01 | 3.995752e-01 |
| 0.8194410 | -0.1252504433 | 6.063247e-01 | 0.9641086 | -0.2829717988 | 2.245104e-01 | 5.339463e-01 |
| 0.9949051 | -0.1102512255 | 3.155869e-01 | 0.9300968 | -0.0444323938 | 6.184722e-01 | 8.433108e-01 |
| 0.8497626 | -0.1193408665 | 2.401003e-01 | 0.8975264 | -0.0825251707 | 3.683314e-01 | 6.675072e-01 |
| 0.8532963 | 0.1834593649  | 6.275509e-01 | 0.9689755 | -0.7242336248 | 2.918355e-03 | 2.923301e-02 |
| 0.9949051 | 0.0313337507  | 7.275314e-01 | 0.9733364 | -0.1246454247 | 1.417247e-01 | 4.317490e-01 |
| 0.9949051 | -0.0584135877 | 6.061678e-01 | 0.9641086 | -0.0085466489 | 9.444330e-01 | 9.835175e-01 |
| 0.9949051 | 0.0797817400  | 4.677551e-01 | 0.9641086 | -0.0037767978 | 9.745725e-01 | 9.927624e-01 |
| 0.6922402 | -0.2368794598 | 8.030195e-02 | 0.7921508 | -0.0970749962 | 5.996776e-01 | 8.313707e-01 |
| 0.9210048 | -0.0066527842 | 9.916883e-01 | 0.9997294 | 1.8072232015  | 9.352322e-02 | 3.558867e-01 |
| 0.9949051 | 0.6868899565  | 3.925972e-01 | 0.9430561 | 3.1045039015  | 1.225898e-03 | 1.476075e-02 |
| 0.9949051 | 0.0563071819  | 8.493669e-01 | 0.9969722 | 0.0702416248  | 8.259028e-01 | 9.359704e-01 |
| 0.9949051 | -0.0291974091 | 6.780405e-01 | 0.9726260 | -0.0106292873 | 9.018196e-01 | 9.710339e-01 |
| 0.9949051 | 0.1498393959  | 7.372916e-02 | 0.7921508 | -0.1207872312 | 9.514398e-02 | 3.558867e-01 |
| 0.9135088 | -0.1196937450 | 3.391163e-01 | 0.9387248 | -0.0586023952 | 7.133506e-01 | 8.762099e-01 |
| 0.7815947 | -0.2326786423 | 1.862719e-02 | 0.4780109 | -0.0344140028 | 7.252583e-01 | 8.773616e-01 |
| 0.8540650 | -0.0999921458 | 7.995333e-01 | 0.9957784 | -0.1842347648 | 6.191225e-01 | 8.433108e-01 |
| 0.8194410 | 0.0745060714  | 5.646834e-01 | 0.9641086 | -0.1151227411 | 4.606507e-01 | 7.428229e-01 |
| 0.9949051 | -0.0305338534 | 8.491357e-01 | 0.9969722 | 0.7517554553  | 9.391109e-04 | 1.206553e-02 |
| 0.8540650 | -0.2613971630 | 2.020970e-01 | 0.8526631 | 0.0108714766  | 9.613547e-01 | 9.906899e-01 |
| 0.9949051 | -0.0762784847 | 5.555143e-01 | 0.9641086 | -0.0677389710 | 6.686618e-01 | 8.600198e-01 |
| 0.8194410 | -0.0059470003 | 9.670745e-01 | 0.9969722 | -0.0517745390 | 7.359147e-01 | 8.795259e-01 |
| 0.9694325 | -0.0179109986 | 8.749167e-01 | 0.9969722 | -0.1469477685 | 5.973135e-02 | 2.790611e-01 |
| 0.9787873 | -0.2792386559 | 2.202461e-01 | 0.8800012 | 0.1184041354  | 4.971565e-01 | 7.643323e-01 |
| 0.8497626 | -0.0712223217 | 7.741977e-01 | 0.9920566 | -0.0867056993 | 5.972476e-01 | 8.305255e-01 |
| 0.7696781 | -0.1399788731 | 8.621385e-02 | 0.7921508 | -0.0566948352 | 5.381235e-01 | 7.891587e-01 |
| 0.9314626 | 0.1853123332  | 5.192143e-01 | 0.9641086 | -0.0298423448 | 9.105231e-01 | 9.730907e-01 |
| 0.9949051 | 0.2921286283  | 2.001158e-01 | 0.8526631 | 0.1050693859  | 5.950940e-01 | 8.285045e-01 |
| 0.9949051 | -0.0819371750 | 6.505486e-01 | 0.9689755 | 0.2333729491  | 1.412143e-01 | 4.313058e-01 |
| 0.9949051 | 0.0981323737  | 4.612887e-01 | 0.9641086 | -0.0040198124 | 9.724271e-01 | 9.922242e-01 |
| 0.8194410 | -0.1018018969 | 3.814095e-01 | 0.9430561 | -0.2318135943 | 4.394703e-02 | 2.329390e-01 |
| 0.8805172 | 1.6625759901  | 3.435242e-01 | 0.9398602 | 1.7052944574  | 3.627573e-01 | 6.629639e-01 |
| 0.9867694 | -0.0946404943 | 3.247879e-01 | 0.9364851 | -0.0827161539 | 4.186793e-01 | 7.059613e-01 |
| 0.8264615 | -0.2011677849 | 2.513378e-01 | 0.8975264 | -0.0769       |              |              |



|            |               |              |           |               |              |              |
|------------|---------------|--------------|-----------|---------------|--------------|--------------|
| 0.9949051  | -0.1797009651 | 1.961725e-01 | 0.8526631 | -0.1237388526 | 3.801932e-01 | 6.707992e-01 |
| 0.9949051  | -0.0782626436 | 5.815475e-01 | 0.9641086 | -0.1544952400 | 2.707378e-01 | 5.850313e-01 |
| 0.9949051  | -0.1330575168 | 4.072653e-01 | 0.9430561 | -0.3751329597 | 4.757611e-02 | 2.391031e-01 |
| 0.9949051  | 0.1753893935  | 4.917820e-01 | 0.9641086 | 0.7105332191  | 3.436618e-03 | 3.302505e-02 |
| 0.2019302  | -0.1130050618 | 5.565919e-01 | 0.9641086 | -0.1873185534 | 3.577382e-01 | 6.629639e-01 |
| 0.9949051  | -0.0329872349 | 7.743501e-01 | 0.9520596 | -0.0105283845 | 9.323986e-01 | 9.835175e-01 |
| 0.9949051  | 0.0445787087  | 7.589807e-01 | 0.9855489 | 0.2645469557  | 1.173676e-03 | 1.440394e-02 |
| 0.65259817 | 0.1469291555  | 8.117491e-01 | 0.9957784 | -1.0741115885 | 1.144415e-01 | 3.920865e-01 |
| 0.9949051  | -0.0615214545 | 6.619906e-01 | 0.9689755 | 0.0158795835  | 9.485701e-01 | 9.835175e-01 |
| 0.9961627  | 0.3574895251  | 4.891525e-01 | 0.9641086 | 2.4184838244  | 5.772679e-07 | 2.496980e-04 |
| 0.5133973  | -0.0749125228 | 4.215569e-01 | 0.9430561 | -0.0537871827 | 5.249301e-01 | 7.873952e-01 |
| 0.5133973  | -0.1077093007 | 6.609224e-01 | 0.9689755 | 0.2355270894  | 4.711473e-01 | 7.506714e-01 |
| 0.9949051  | -0.2882333197 | 3.435789e-01 | 0.9396602 | 0.0417430694  | 8.856397e-01 | 9.645345e-01 |
| 0.9949051  | -0.0158621907 | 8.850935e-01 | 0.9969722 | -0.1733785826 | 2.453063e-01 | 5.554637e-01 |
| 0.7815947  | -0.1849807464 | 1.209735e-01 | 0.8166268 | -0.1872761370 | 1.810370e-01 | 4.841307e-01 |
| 0.8264615  | 0.3930870504  | 4.097994e-01 | 0.9430561 | -0.1222639999 | 6.512429e-01 | 8.534026e-01 |
| 0.9949051  | -0.0646817822 | 4.920222e-01 | 0.9641086 | -0.0528666891 | 5.299484e-01 | 7.882615e-01 |
| 0.8497626  | 0.2095419113  | 3.659031e-01 | 0.9430561 | -0.0320822123 | 8.508605e-01 | 9.481630e-01 |
| 0.8194410  | 0.1788857292  | 9.457845e-02 | 0.7921508 | 0.0573236728  | 5.999655e-01 | 8.313707e-01 |
| 0.8194410  | -0.1989485750 | 2.110569e-01 | 0.8699563 | 0.0106558012  | 9.302558e-01 | 9.835175e-01 |
| 0.9949051  | 0.0878454147  | 8.498921e-01 | 0.9969722 | 2.0347795210  | 6.803885e-04 | 9.243899e-03 |
| 0.9949051  | -0.5969068266 | 2.392882e-02 | 0.5545856 | 0.0493336219  | 8.636541e-01 | 9.515996e-01 |
| 0.8899481  | -0.0914761142 | 2.954452e-01 | 0.9286466 | -0.1283829525 | 1.453403e-01 | 4.367095e-01 |
| 0.9949051  | 0.0608280365  | 5.154835e-01 | 0.9641086 | -0.1510676994 | 1.538092e-01 | 4.468082e-01 |
| 0.9949051  | 0.0412700889  | 8.188960e-01 | 0.9957784 | -0.0032157786 | 9.813823e-01 | 9.950155e-01 |
| 0.8497626  | 0.1209421641  | 5.696015e-01 | 0.9641086 | -0.1688549939 | 4.327399e-01 | 7.187080e-01 |
| 0.8394240  | -0.0471119625 | 8.175660e-01 | 0.9957784 | -0.3799210066 | 1.224904e-01 | 3.995752e-01 |
| 0.8612982  | 0.2335536067  | 3.260264e-01 | 0.9364851 | -0.0134582208 | 9.589559e-01 | 9.906899e-01 |
| 0.9949051  | 0.0053604535  | 9.684146e-01 | 0.9969722 | -0.0161277558 | 9.315717e-01 | 9.835175e-01 |
| 0.9949051  | 0.0555137147  | 7.036067e-01 | 0.9733364 | -0.0018690179 | 9.904276e-01 | 9.950155e-01 |
| 0.9949051  | -0.1487631241 | 5.049923e-01 | 0.9641086 | -0.0486876038 | 6.052220e-01 | 9.213673e-01 |
| 0.8497626  | 0.4027415000  | 3.322759e-01 | 0.9366787 | -0.2923802478 | 5.477884e-01 | 7.942705e-01 |
| 0.9949051  | -0.2322367519 | 4.965154e-01 | 0.9641086 | -0.2580624920 | 4.756792e-01 | 7.506714e-01 |
| 0.9949051  | -0.0543792304 | 8.311516e-01 | 0.9964090 | -0.5008165520 | 1.026625e-01 | 3.699605e-01 |
| 0.9210048  | -0.2338254102 | 6.839536e-03 | 0.3233732 | -0.1454039905 | 1.842667e-01 | 4.883481e-01 |
| 0.9949051  | -0.0053226403 | 9.583951e-01 | 0.9969722 | -0.1998510513 | 4.901149e-02 | 2.440266e-01 |
| 0.2019302  | -0.1258119039 | 2.488900e-01 | 0.8975264 | -0.0524143243 | 7.044277e-01 | 8.762099e-01 |
| 0.9949051  | 0.0181847127  | 8.313342e-01 | 0.9964090 | -0.0866051114 | 3.179768e-01 | 6.316783e-01 |
| 0.8329325  | -0.0284247784 | 6.464281e-01 | 0.9689755 | 0.1313834657  | 1.625726e-02 | 1.164611e-01 |
| 0.8194410  | 0.0222095477  | 9.285639e-01 | 0.9969722 | 0.3560981674  | 2.740451e-01 | 5.878791e-01 |
| 0.8612982  | -0.0654570113 | 4.217826e-01 | 0.9430561 | -0.1205355095 | 1.878537e-01 | 4.902249e-01 |
| 0.9949051  | 0.0191987041  | 7.918298e-01 | 0.9957784 | -0.0591301084 | 4.798221e-01 | 7.551927e-01 |
| 0.7815947  | -0.1579900055 | 2.795692e-01 | 0.9128476 | 0.0961631382  | 4.394800e-01 | 7.244984e-01 |
| 0.8539066  | -0.1247654978 | 3.657274e-01 | 0.9430561 | -0.0657523375 | 6.067154e-01 | 8.360191e-01 |
| 0.8497626  | -0.0265137362 | 9.030955e-01 | 0.9969722 | 0.0414804676  | 8.441055e-01 | 9.481630e-01 |
| 0.9949051  | -0.0108314463 | 9.434920e-01 | 0.9969722 | -0.2712514409 | 3.091853e-01 | 6.215256e-01 |
| 0.9949051  | -0.1900940469 | 1.079059e-01 | 0.8123872 | -0.1475016522 | 1.393298e-01 | 4.288747e-01 |
| 0.9949051  | -0.0976022999 | 1.844083e-01 | 0.8526631 | -0.0091988421 | 8.877113e-01 | 9.645345e-01 |
| 0.9949051  | -0.0573070062 | 8.127038e-01 | 0.9957784 | 0.1825396342  | 8.043080e-02 | 3.293325e-01 |
| 0.9949051  | -0.1238537102 | 1.278491e-01 | 0.8166268 | 0.0134806232  | 6.620432e-01 | 9.515996e-01 |
| 0.9949051  | -0.0939124630 | 3.193831e-01 | 0.9300968 | 0.0758158543  | 4.123435e-01 | 6.984455e-01 |
| 0.4880000  | 0.0535474771  | 8.369989e-01 | 0.9969722 | -0.1390791343 | 6.542333e-01 | 8.556317e-01 |
| 0.8805172  | -0.2650113520 | 8.031871e-02 | 0.7921508 | -0.2171829650 | 1.451518e-01 | 4.367095e-01 |
| 0.9949051  | -0.3283403120 | 3.393336e-02 | 0.6684872 | -0.2759874166 | 1.765751e-01 | 4.802300e-01 |
| 0.9210048  | -0.3890605504 | 1.192088e-01 | 0.8166268 | -0.1872531885 | 4.437237e-01 | 7.274360e-01 |
| 0.6383206  | 0.0709486046  | 5.842494e-01 | 0.9641086 | 0.1270765466  | 1.669443e-01 | 4.676259e-01 |
| 0.9275791  | 0.0573348238  | 8.781793e-01 | 0.9969722 | 0.5519186425  | 1.445746e-01 | 4.367095e-01 |
| 0.8741974  | 0.1071255968  | 5.483134e-01 | 0.9641086 | 0.0013581593  | 9.929049e-01 | 9.950155e-01 |
| 0.9379096  | -0.0338174744 | 8.050012e-01 | 0.9957784 | -0.0449588946 | 7.301648e-01 | 8.778587e-01 |
| 0.7817234  | -0.1192755776 | 4.178576e-01 | 0.9430561 | 0.0657433691  | 6.444720e-01 | 8.512682e-01 |
| 0.9949051  | -0.0459318426 | 6.899839e-01 | 0.9733364 | -0.0784821034 | 4.880648e-01 | 7.621198e-01 |
| 0.9210048  | -0.0232901695 | 8.191638e-01 | 0.9957784 | -0.1323811851 | 1.673484e-01 | 4.676259e-01 |
| 0.9949051  | -0.0654097021 | 5.530803e-01 | 0.9641086 | -0.1226016551 | 4.362379e-01 | 7.217613e-01 |
| 0.9149215  | -0.1413236841 | 1.450860e-01 | 0.8166268 | -0.1104522136 | 2.148346e-01 | 5.227838e-01 |
| 0.8210171  | -0.0857618031 | 4.760962e-01 | 0.9641086 | -0.0083410629 | 9.323935e-01 | 9.835175e-01 |
| 0.9509918  | -0.2561924104 | 1.985913e-01 | 0.8526631 | -0.2334207404 | 3.467819e-01 | 6.547862e-01 |
| 0.6922402  | -0.5038100964 | 1.252427e-01 | 0.8166268 | 0.0050323142  | 9.854143e-01 | 9.950155e-01 |
| 0.9949051  | -0.3045161787 | 1.237596e-01 | 0.8166268 | -0.5179842018 | 2.47293e-03  | 7.590486e-02 |
| 0.9949051  | 0.1893579803  | 4.735586e-01 | 0.9641086 | -0.4813548846 | 2.247864e-02 | 1.919370e-01 |
| 0.9148164  | 0.0464116734  | 7.469457e-01 | 0.9820799 | 0.0493986034  | 7.743734e-01 | 9.026719e-01 |
| 0.9949051  | -0.8882642604 | 1.564126e-01 | 0.8386867 | -0.8957941660 | 1.459797e-01 | 4.367095e-01 |
| 0.9949051  | 0.0671031410  | 9.062983e-01 | 0.9969722 | 2.3238708336  | 8.814453e-04 | 1.157632e-02 |
| 0.8394240  | -0.2488406505 | 2.966816e-01 | 0.9286466 | -0.0160334553 | 9.360851e-01 | 9.835175e-01 |
| 0.8394240  | 0.0295101708  | 8.829535e-01 | 0.9969722 | -0.0029102060 | 9.871003e-01 | 9.950155e-01 |
